# Supplementary material for: Copper-catalyzed enantioselective Sonogashira-type oxidative cross-coupling of unactivated C(sp3)−H bonds with alkynes
Source: PubMed Central journal article supplement (PMC6908613; doi:10.1038/s41467-019-13705-1), 2019-12-12
Supplement: 41467_2019_13705_MOESM2_ESM.pdf [file 41467_2019_13705_MOESM2_ESM.pdf]

## Supplementary Information

# Copper-Catalyzed Enantioselective Sonogashira-Type Oxidative Cross-Coupling of Unactivated C(*sp*<sup>3</sup>)-H Bonds with Alkynes

Zhang et al.

**Supplementary Table 1** HPLC data and optical rotation of **5a** in literatures. <sup>1-4</sup>

| entry | absolute configuration of <b>5</b> | chiral resolution conditions                                         | $t_R$ (minor) | $t_R$ (major) | $[\alpha]$                                                                   | references                                             |
|-------|------------------------------------|----------------------------------------------------------------------|---------------|---------------|------------------------------------------------------------------------------|--------------------------------------------------------|
| 1     | <b>R</b> (89% ee)                  | OD-H ( <i>n</i> hexane/ <i>i</i> -PrOH = 99.5/0.5; flow: 0.8 mL/min) | 13.60         | 19.32         | $[\alpha]_D^{27} = -12.8$ ( <i>c</i> 0.71, CHCl <sub>3</sub> ).              | this work                                              |
| 2     | <b>R</b> (82% ee)                  | OD-H ( <i>n</i> hexane; flow: 0.5 mL/min)                            | 20.67         | 26.00         | --                                                                           | <i>Chem. Eur. J.</i> <b>14</b> , 741-746 (2008)        |
| 3     | <b>S</b> (84% ee)                  | OD-H ( <i>n</i> hexane; flow: 0.5 mL/min)                            | 27.54         | 20.79         | $[\alpha]_D^{20} = +12.1$ ( <i>c</i> 1.85, CHCl <sub>3</sub> )               | <i>Chem. Eur. J.</i> <b>14</b> , 741-746 (2008)        |
| 4     | <b>S</b> (90% ee)                  | IA ( <i>n</i> hexane; flow: 0.5 mL/min)                              | 25.3          | 18.1          | $[\alpha]_D^{20} = +12.7$ ( <i>c</i> 0.70, CH <sub>2</sub> Cl <sub>2</sub> ) | <i>Chem. Eur. J.</i> <b>18</b> , 9775-9779 (2012)      |
| 5     | <b>S</b> (74% ee)                  | OD-H ( <i>n</i> hexane; flow: 0.5 mL/min)                            | 55.0          | 44.0          | $[\alpha]_D^{25} = +9.4$ ( <i>c</i> 0.89, CHCl <sub>3</sub> )                | <i>Synlett</i> <b>29</b> , 2251-2256 (2018)            |
| 6     | <b>R</b> (98% ee)                  | ID [CO <sub>2</sub> ], 1.0 mL/min                                    | 24.5          | 22.9          | $[\alpha]_D^{20} = -16.3$ ( <i>c</i> 1.0, CHCl <sub>3</sub> ).               | <i>J. Am. Chem. Soc.</i> <b>139</b> , 8448-8451 (2017) |

## Supplementary Figures

### a Radical inhibition experiments

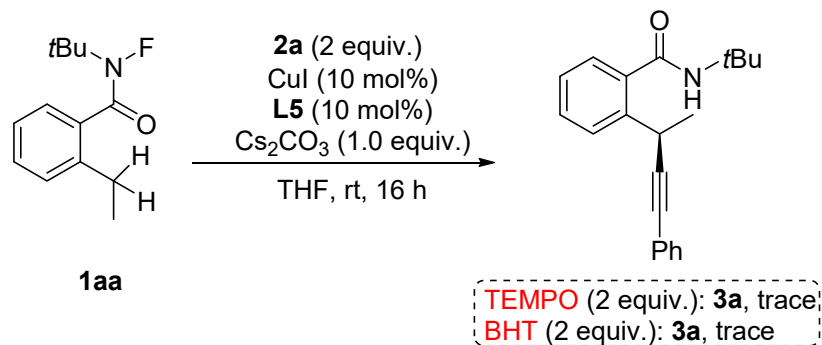

### b Intramolecular KIE

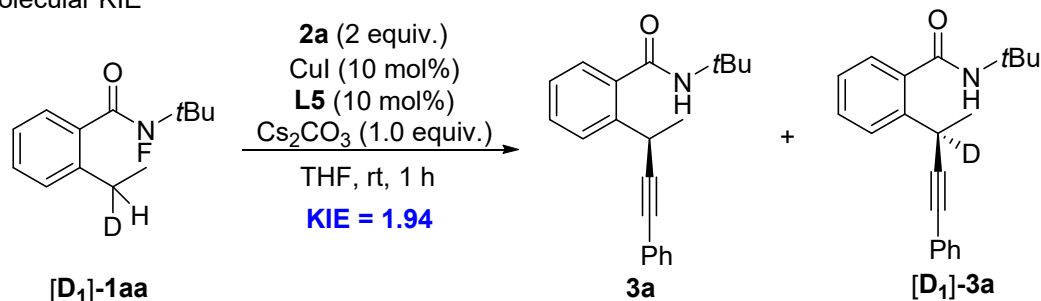

### c Intermolecular KIE

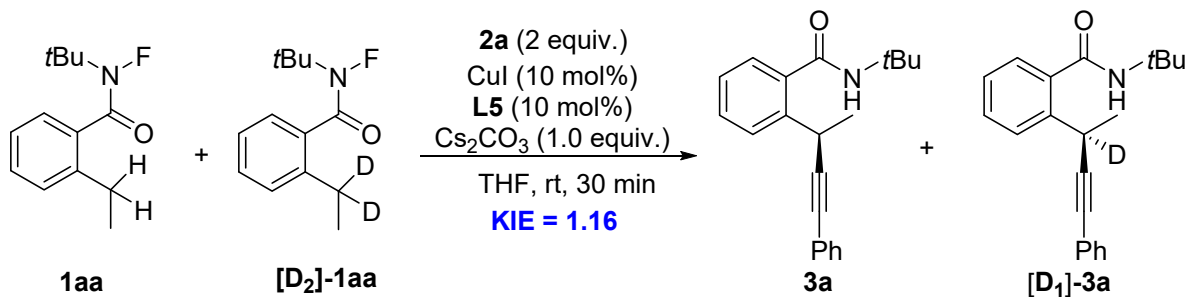

**Supplementary Figure 1** Mechanistic studies of Sonogashira-type enantioselective oxidative cross-coupling reaction. **a** The reaction was significantly inhibited by addition of common radical inhibitors TEMPO and BHT. **b** and **c** An intramolecular KIE of 1.94 and an intermolecular KIE of 1.16 were observed, respectively, on substrate **1aa** and its corresponding deuterated derivatives, thus indicating the HAA step might not be involved in the rate-determining step(s).

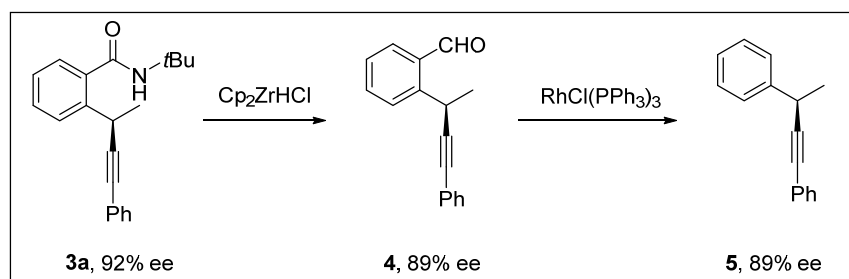

The absolute configuration of **3a** was determined by comparing the HPLC spectrum and specific rotation of prepared **5** with those reported in literature,<sup>1-4</sup> The product **3a** was determined to be of an “S” absolute configuration according to the “R” absolute configuration of **5**.

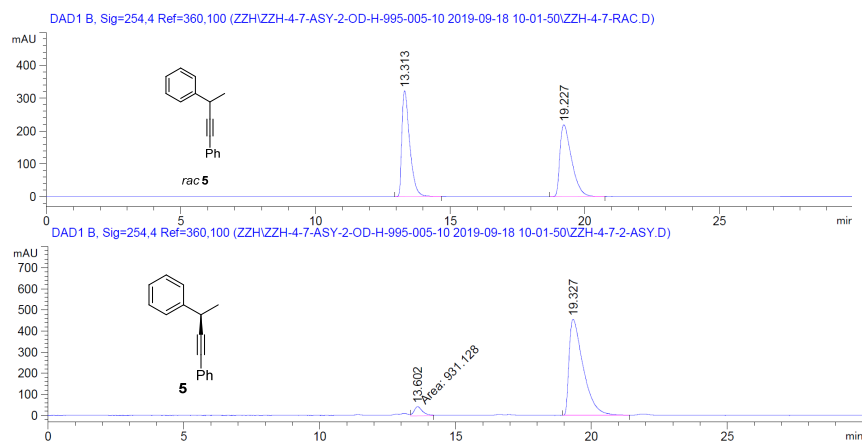

**Supplementary Figure 2** Determination of absolute stereochemistry

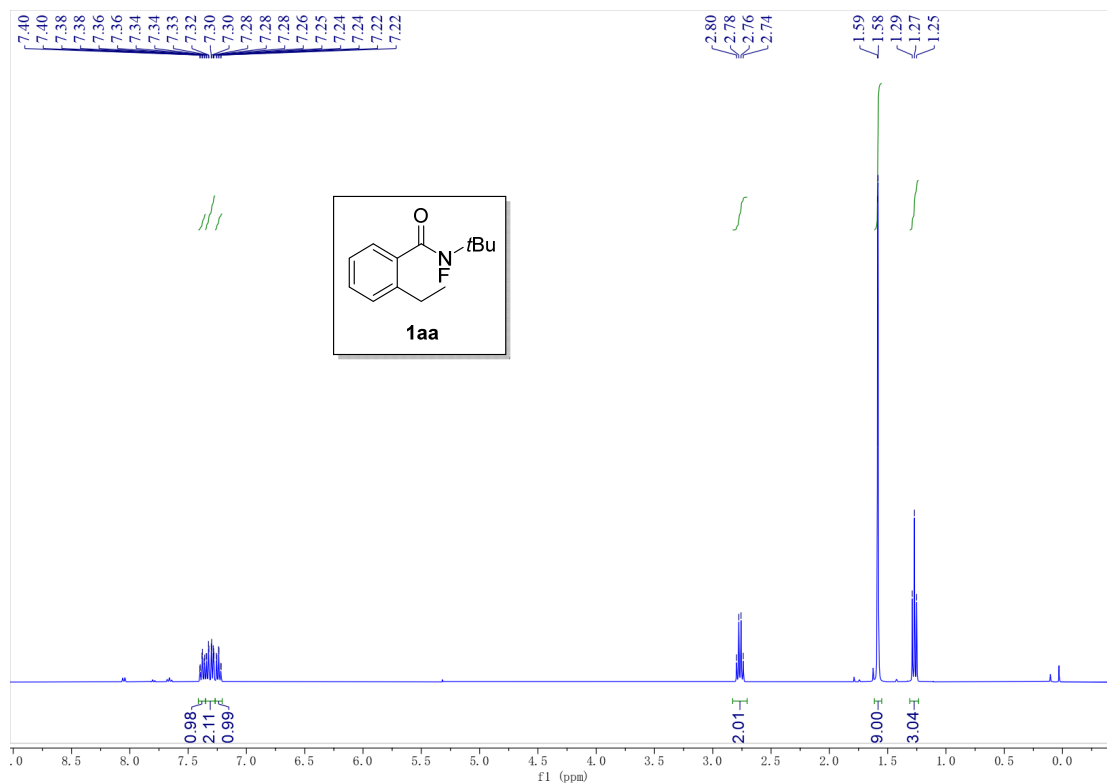

Supplementary Figure 3  $^1\text{H}$  NMR of **1aa**

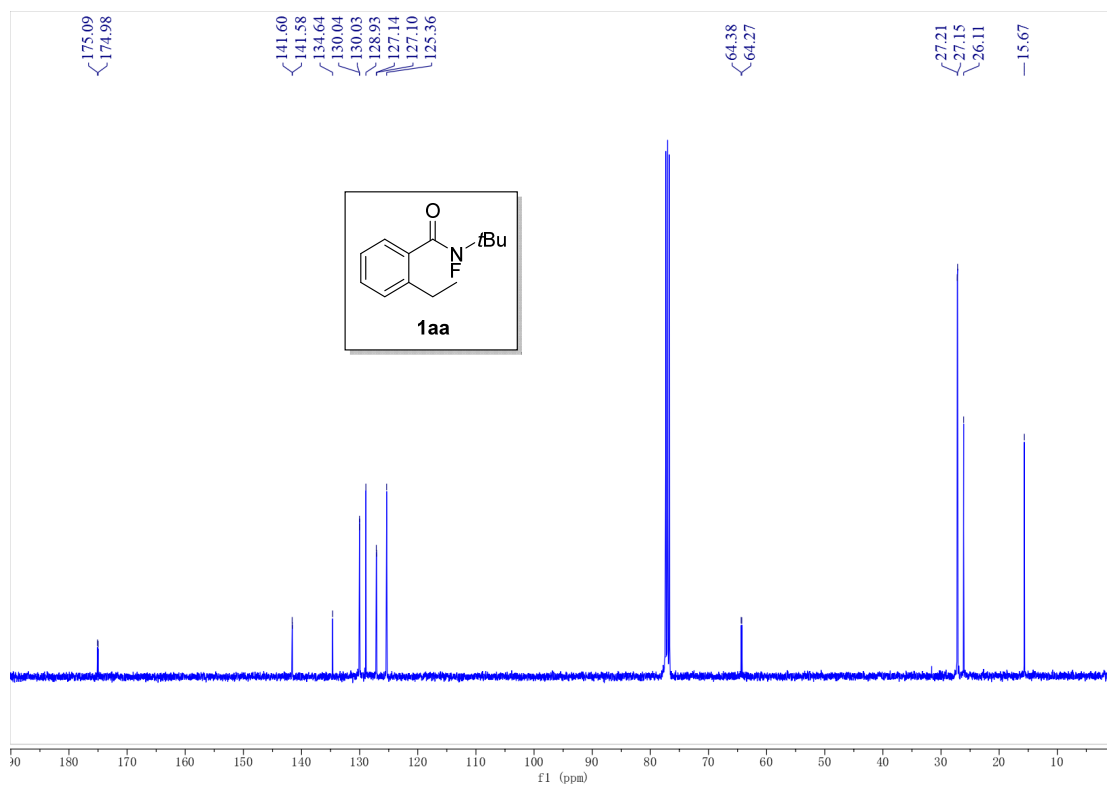

Supplementary Figure 4  $^{13}\text{C}$  NMR of **1aa**

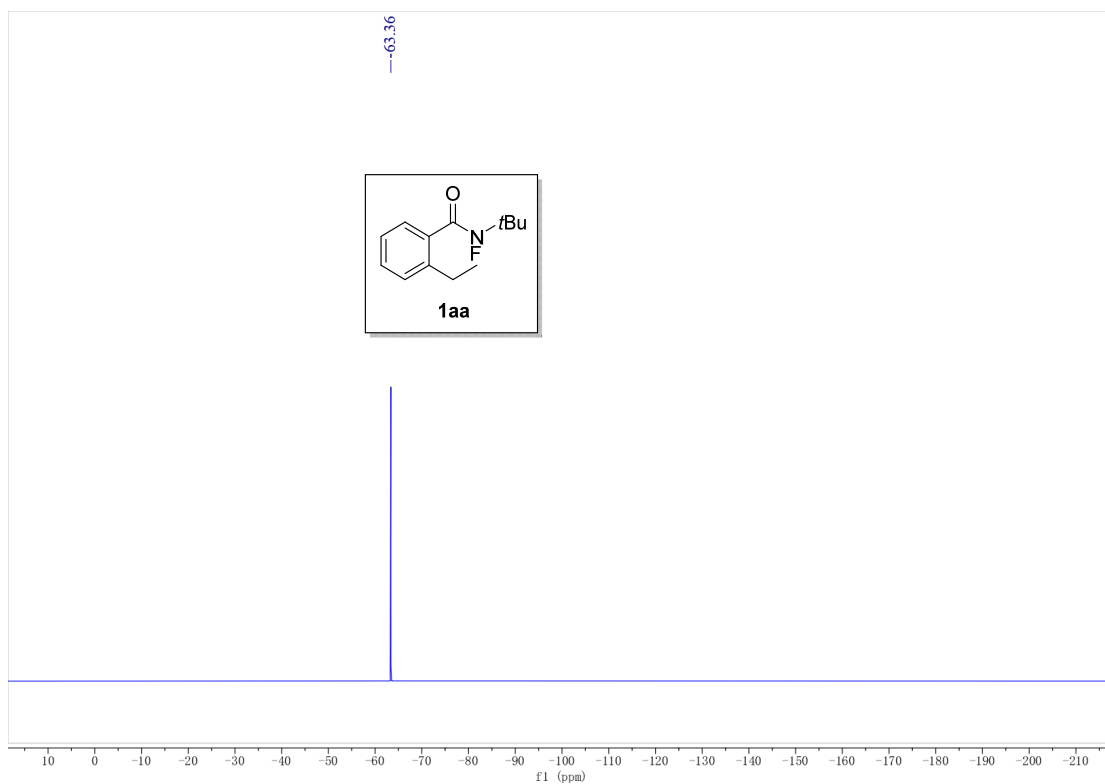

Supplementary Figure 5  $^{19}\text{F}$  NMR of **1aa**

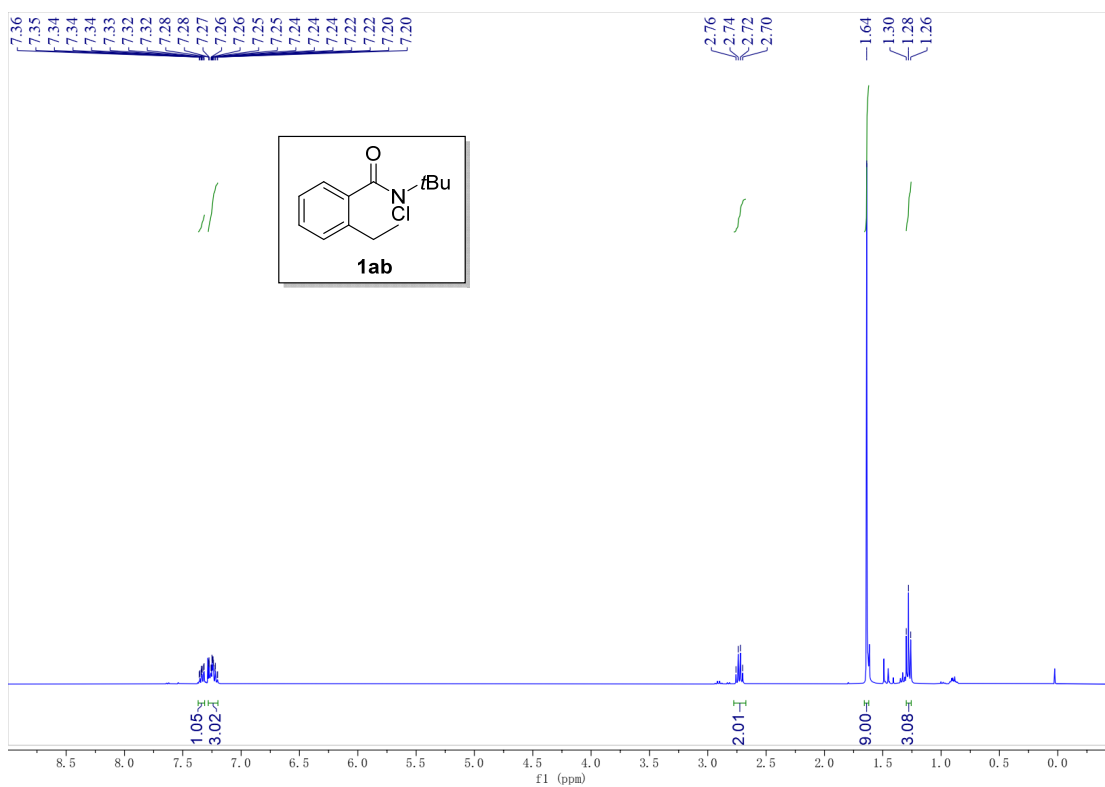

Supplementary Figure 6  $^1\text{H}$  NMR of **1ab**

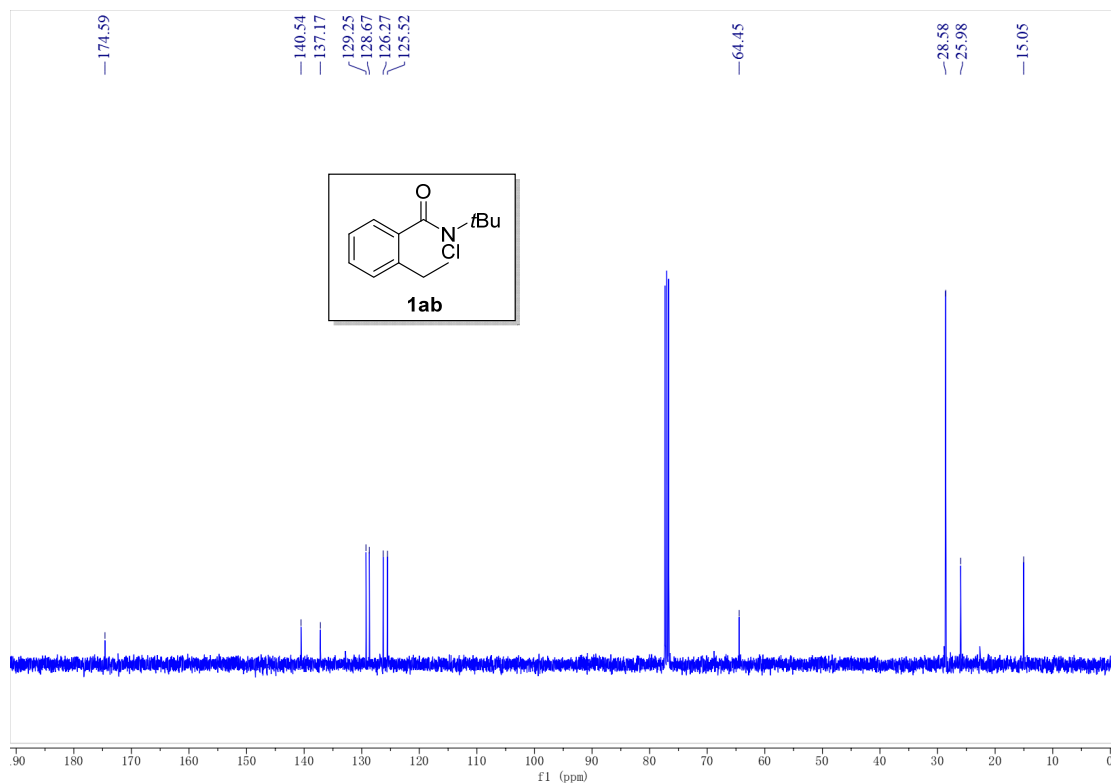

Supplementary Figure 7 <sup>1</sup>H NMR of **1ab**

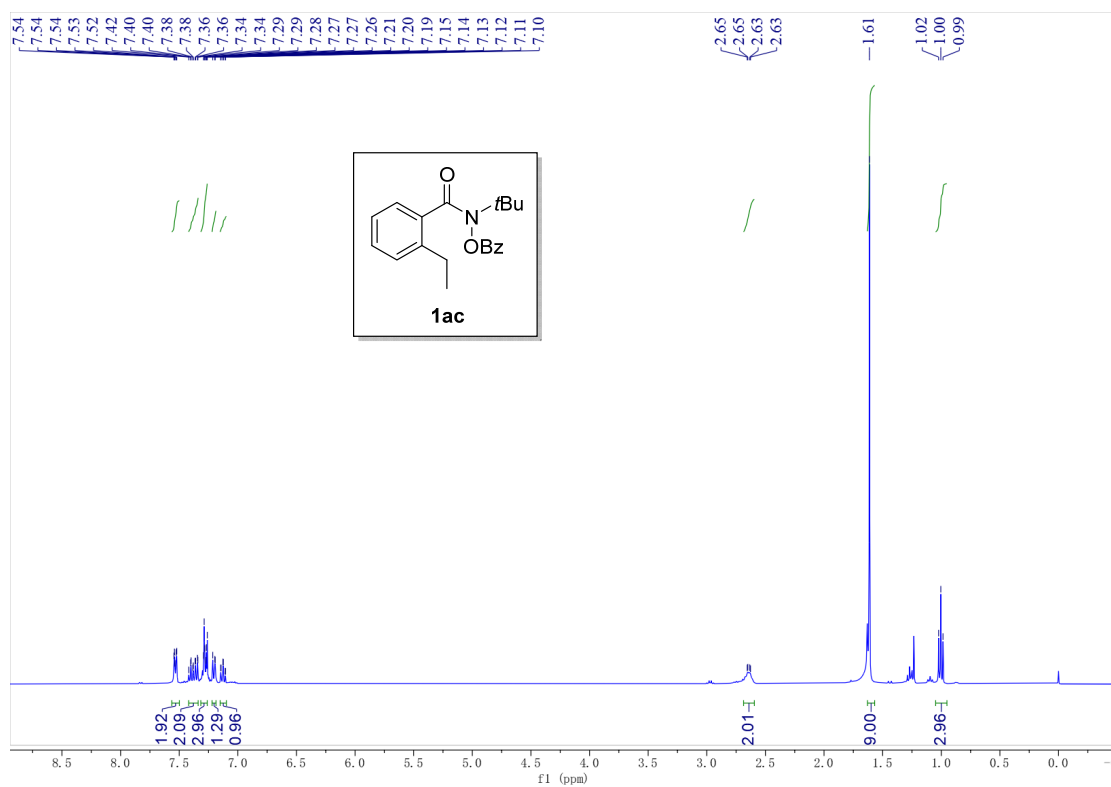

Supplementary Figure 8 <sup>1</sup>H NMR of **1ac**

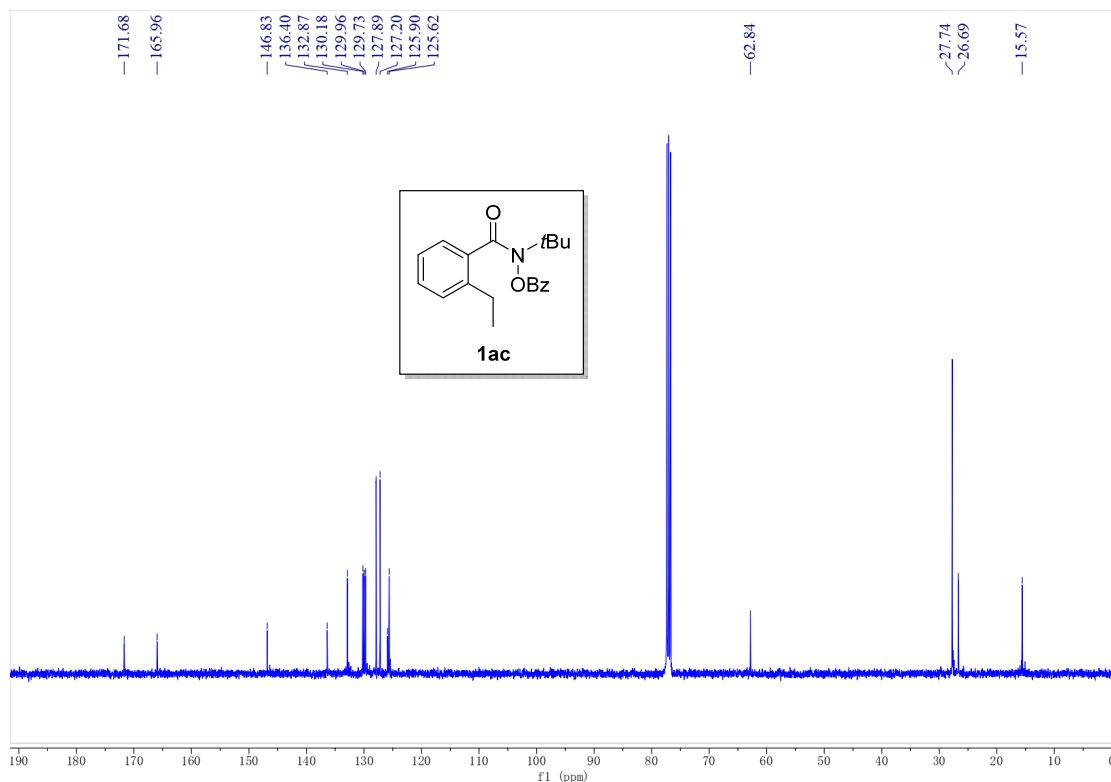

Supplementary Figure 9 <sup>13</sup>C NMR of **1ac**

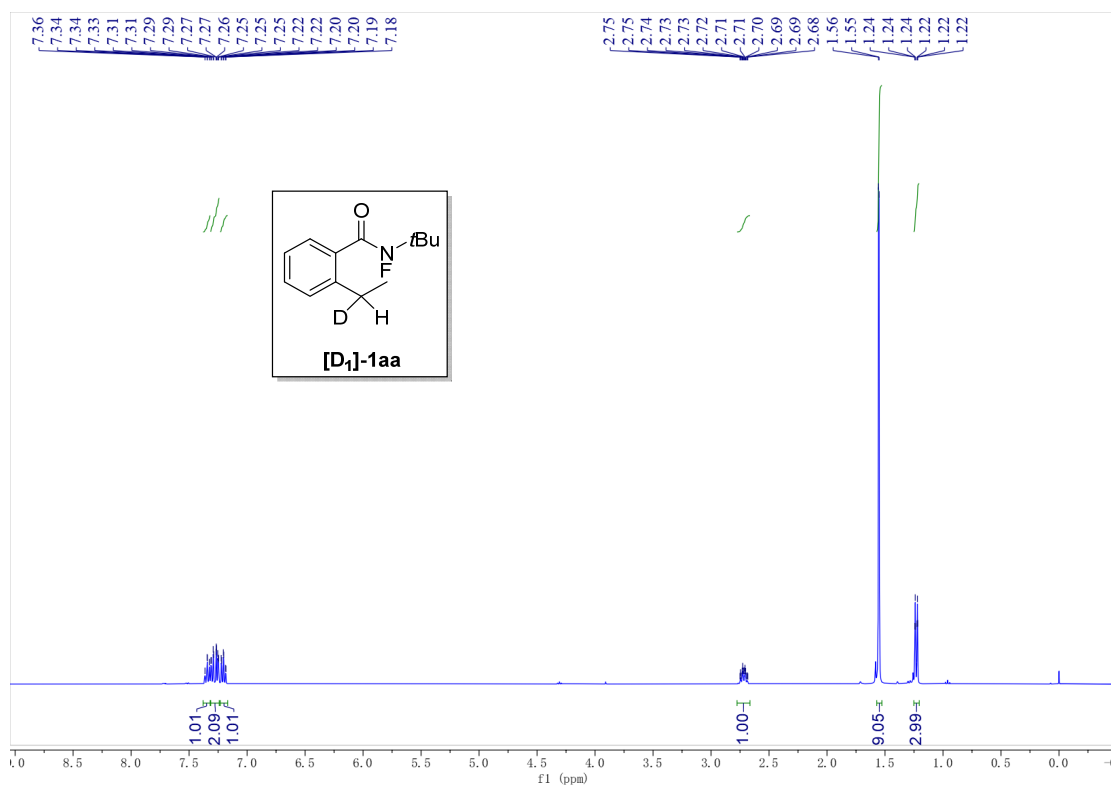

Supplementary Figure 10 <sup>1</sup>H NMR of **[D<sub>1</sub>]-1aa**



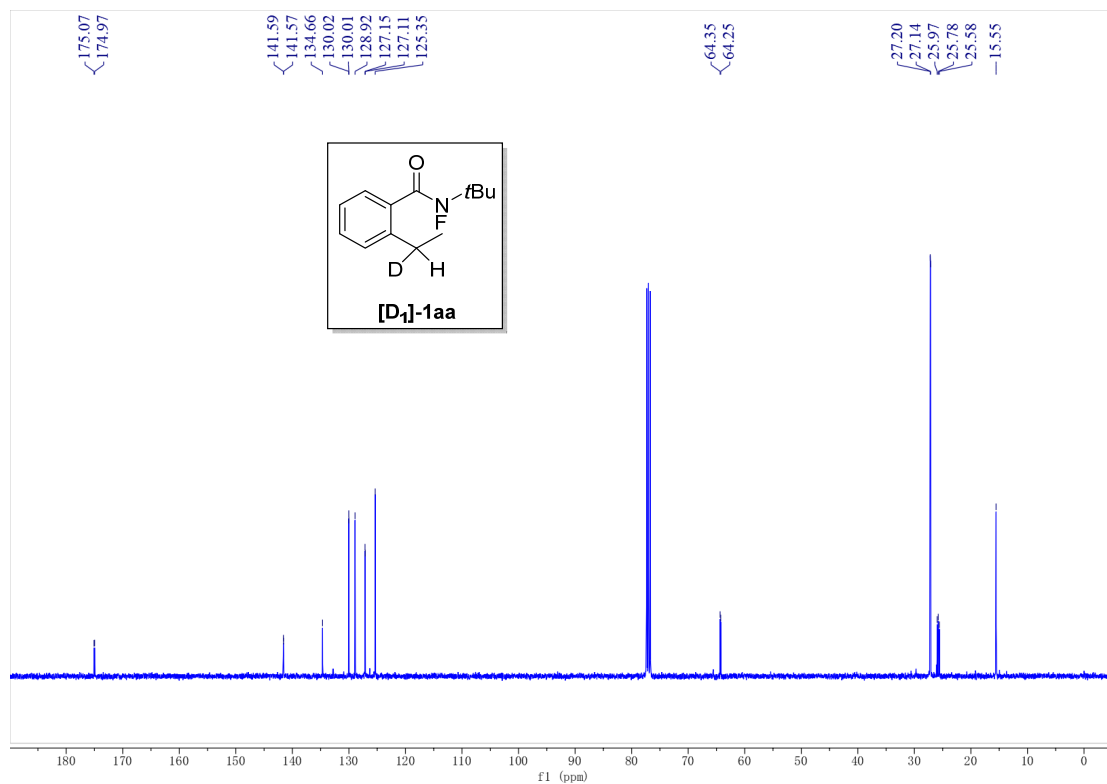

Supplementary Figure 11 <sup>13</sup>C NMR of **[D<sub>1</sub>]-1aa**

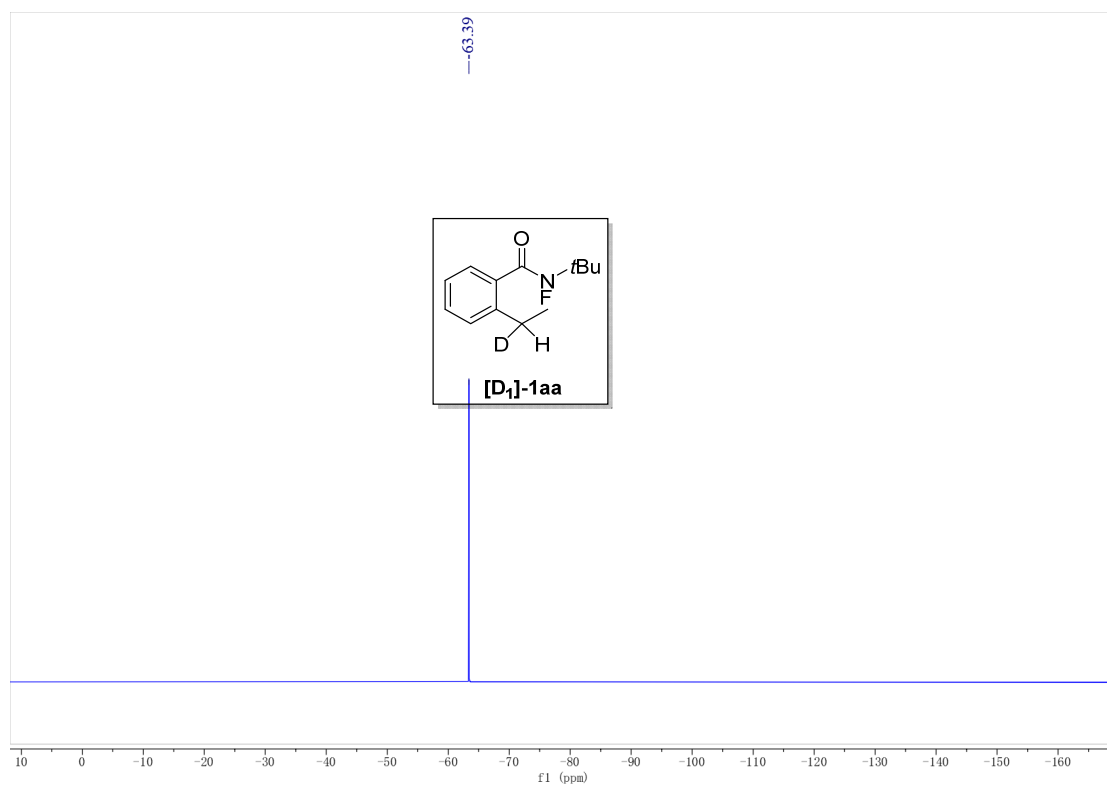

Supplementary Figure 12 <sup>19</sup>F NMR of **[D<sub>1</sub>]-1aa**

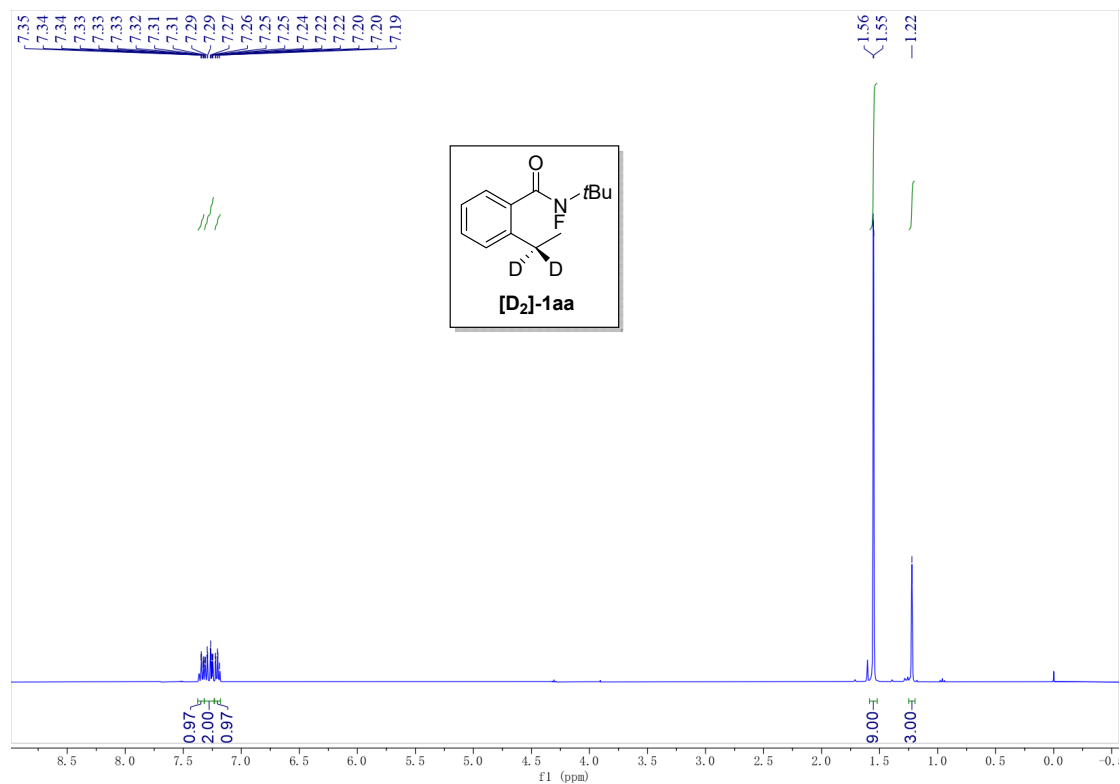

Supplementary Figure 13 <sup>1</sup>H NMR of [D<sub>2</sub>]-1aa

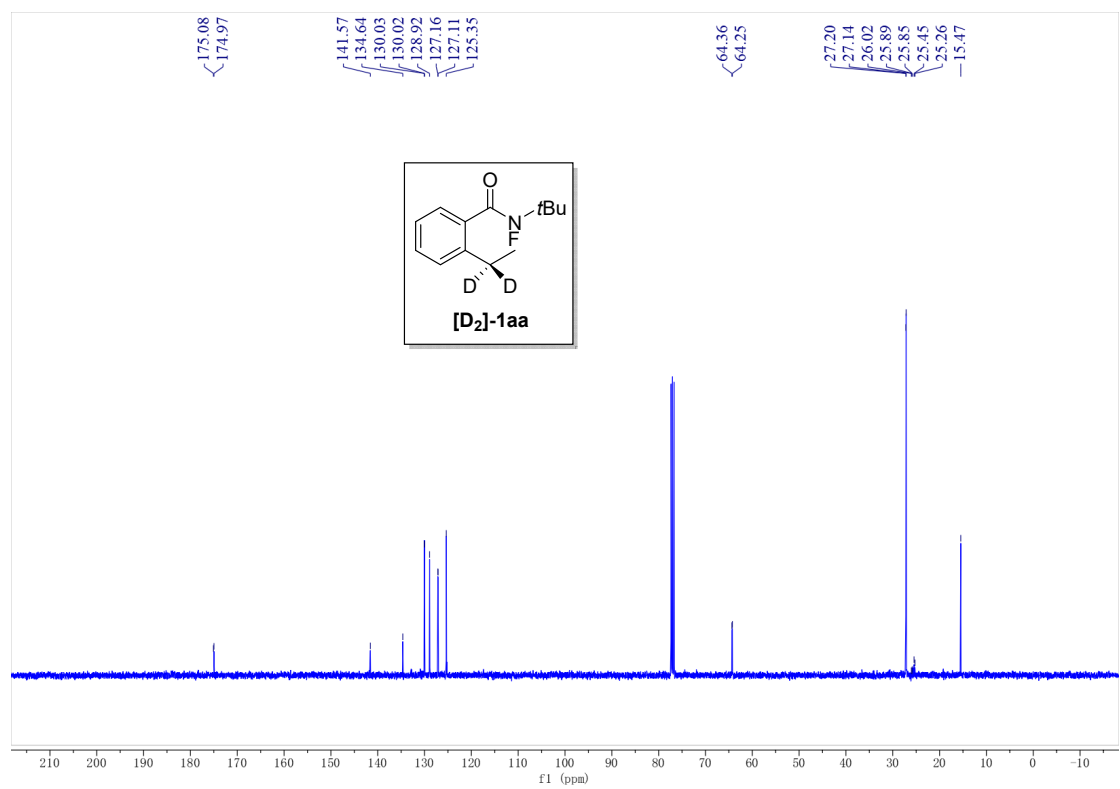

Supplementary Figure 14 <sup>13</sup>C NMR of [D<sub>2</sub>]-1aa

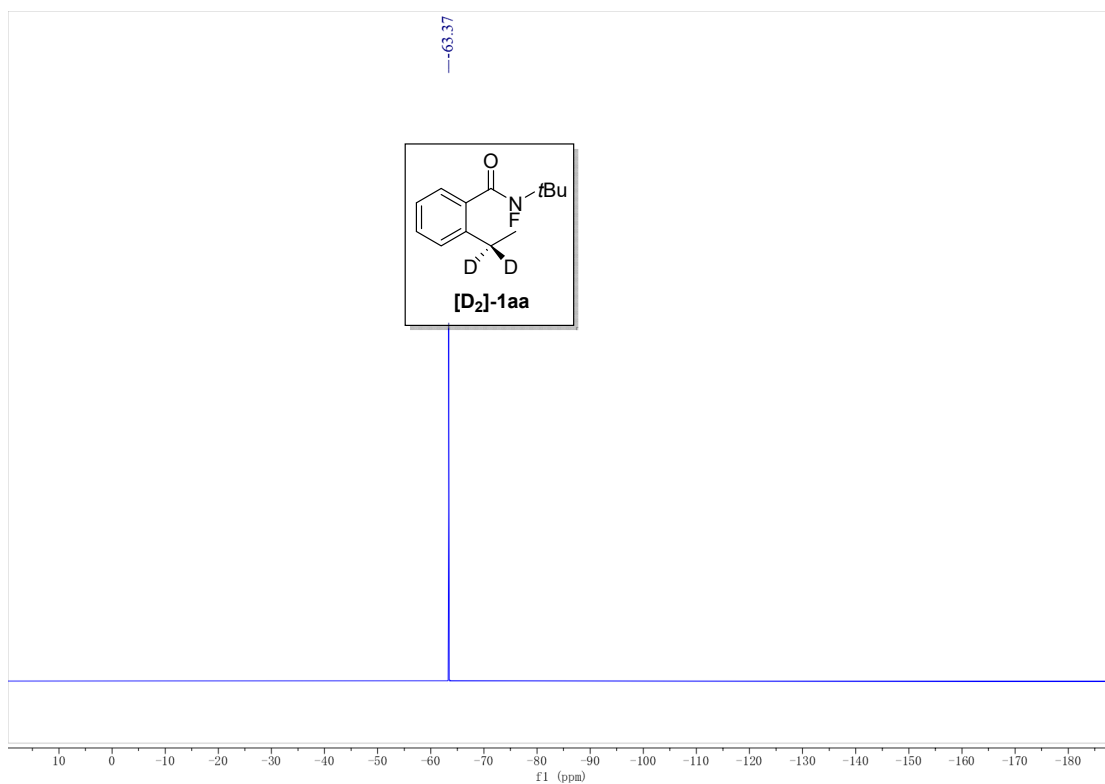

Supplementary Figure 15 <sup>19</sup>F NMR of [D<sub>2</sub>]-1aa

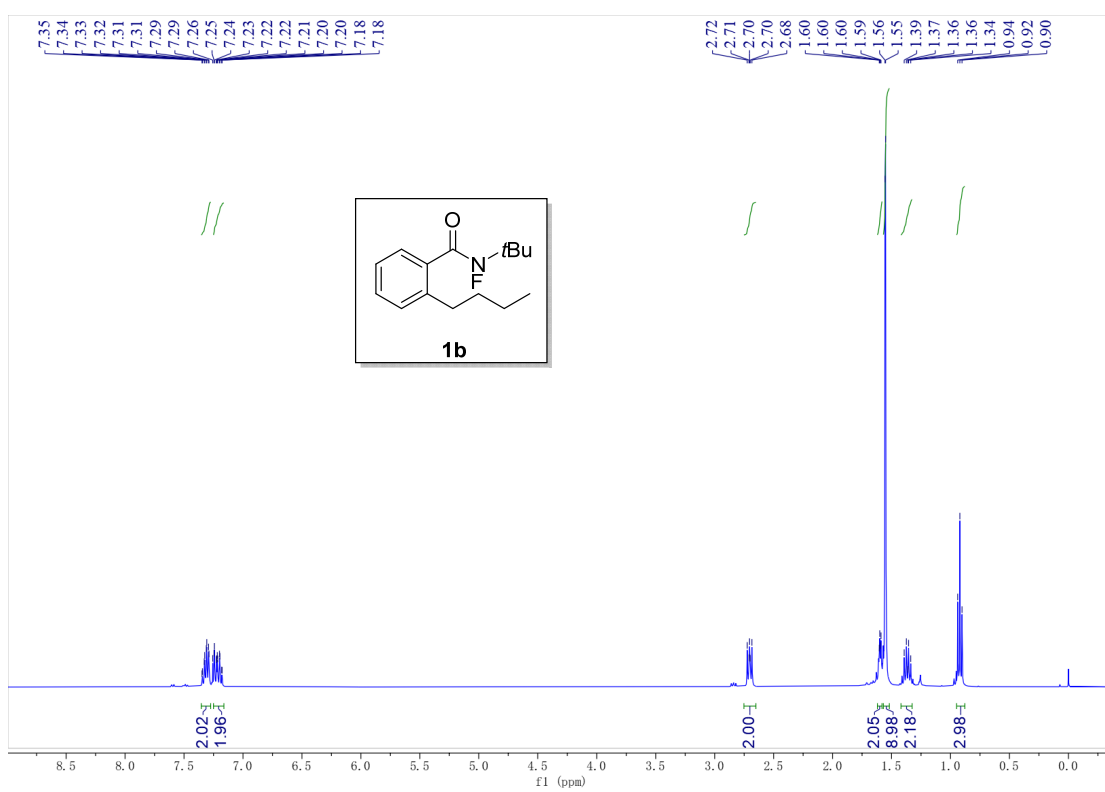

Supplementary Figure 16 <sup>1</sup>H NMR of 1b

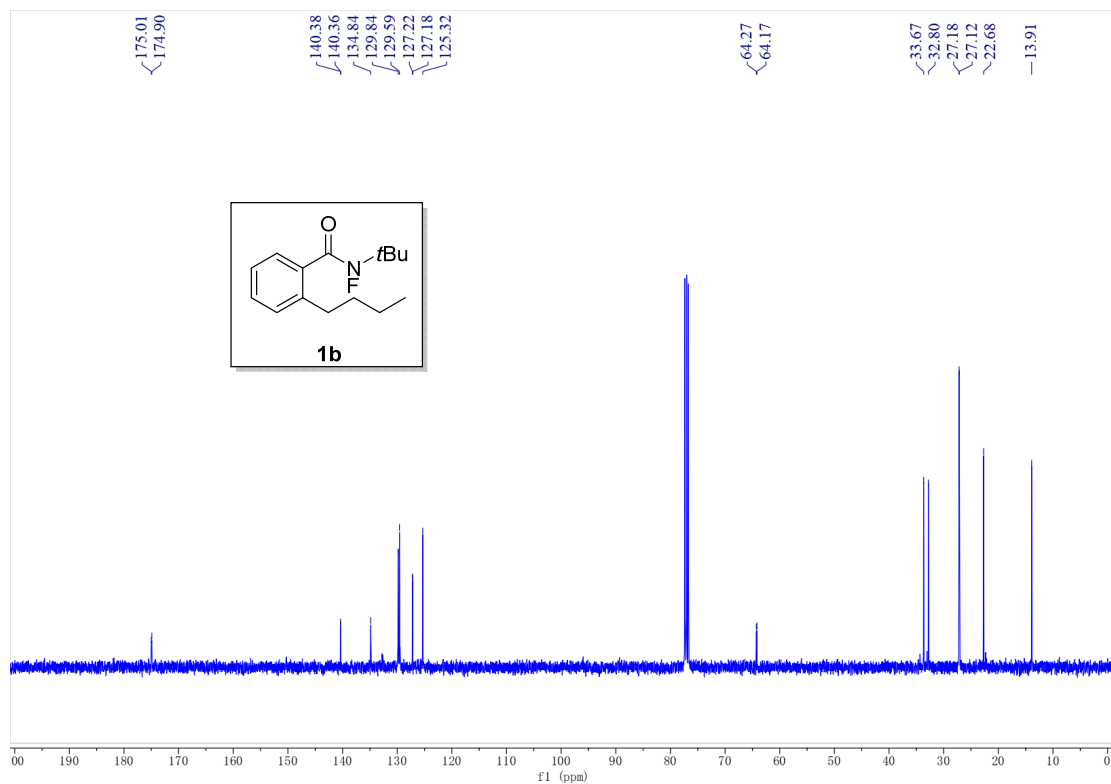

Supplementary Figure 17 <sup>13</sup>C NMR of **1b**

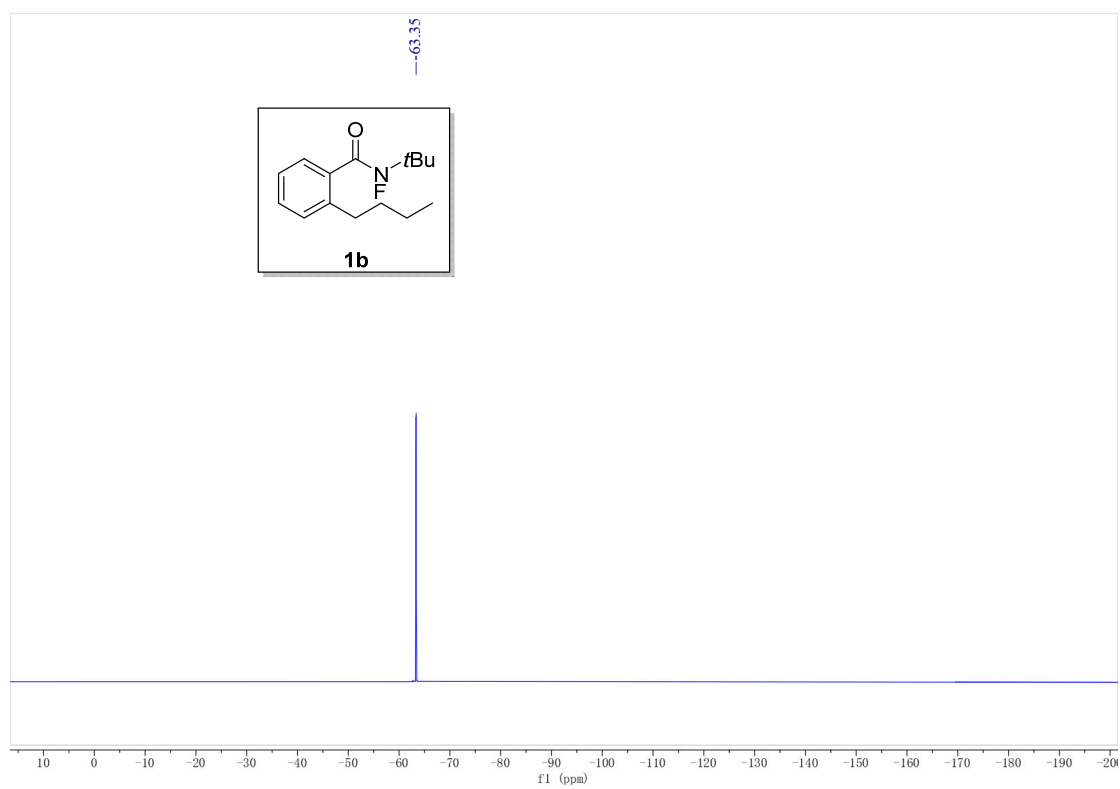

Supplementary Figure 18 <sup>19</sup>F NMR of **1b**

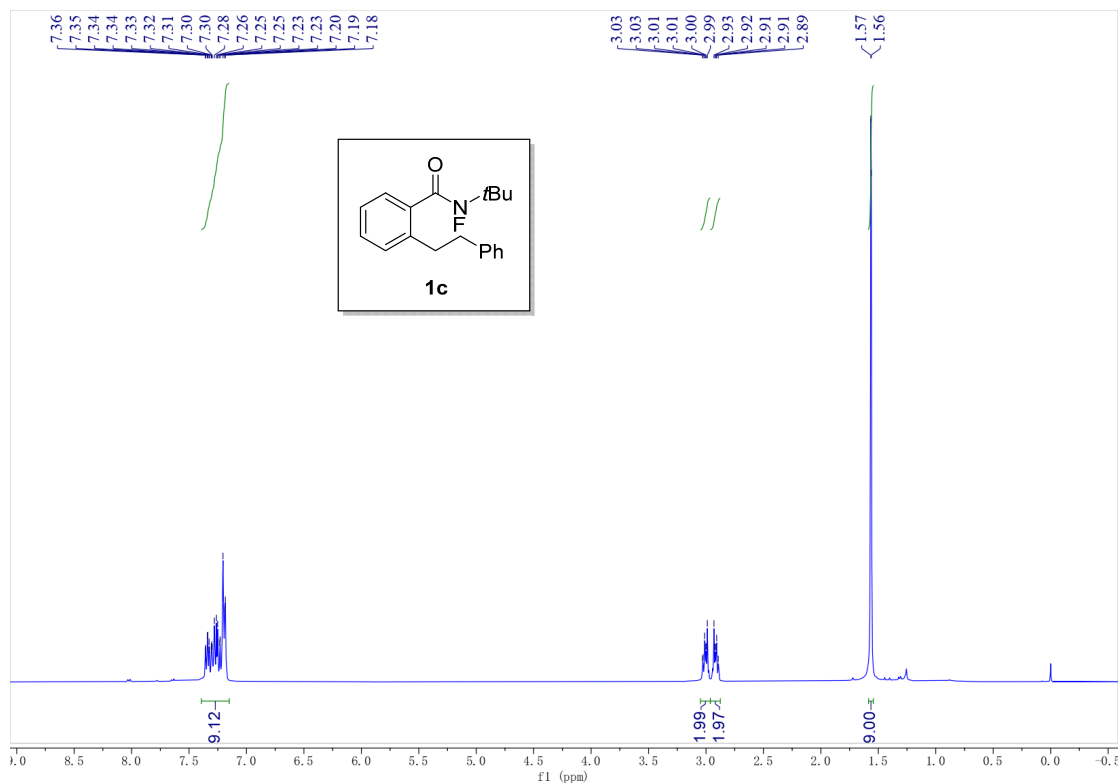

Supplementary Figure 19 <sup>1</sup>H NMR of **1c**

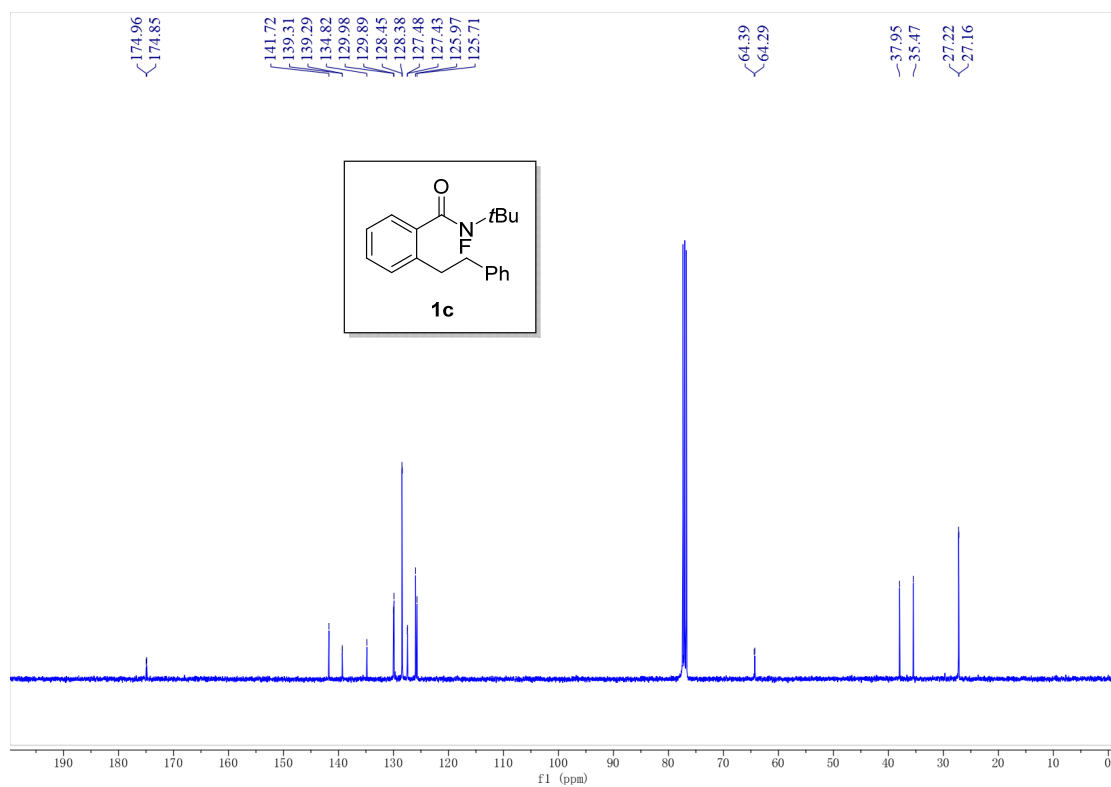

Supplementary Figure 20 <sup>13</sup>C NMR of **1c**

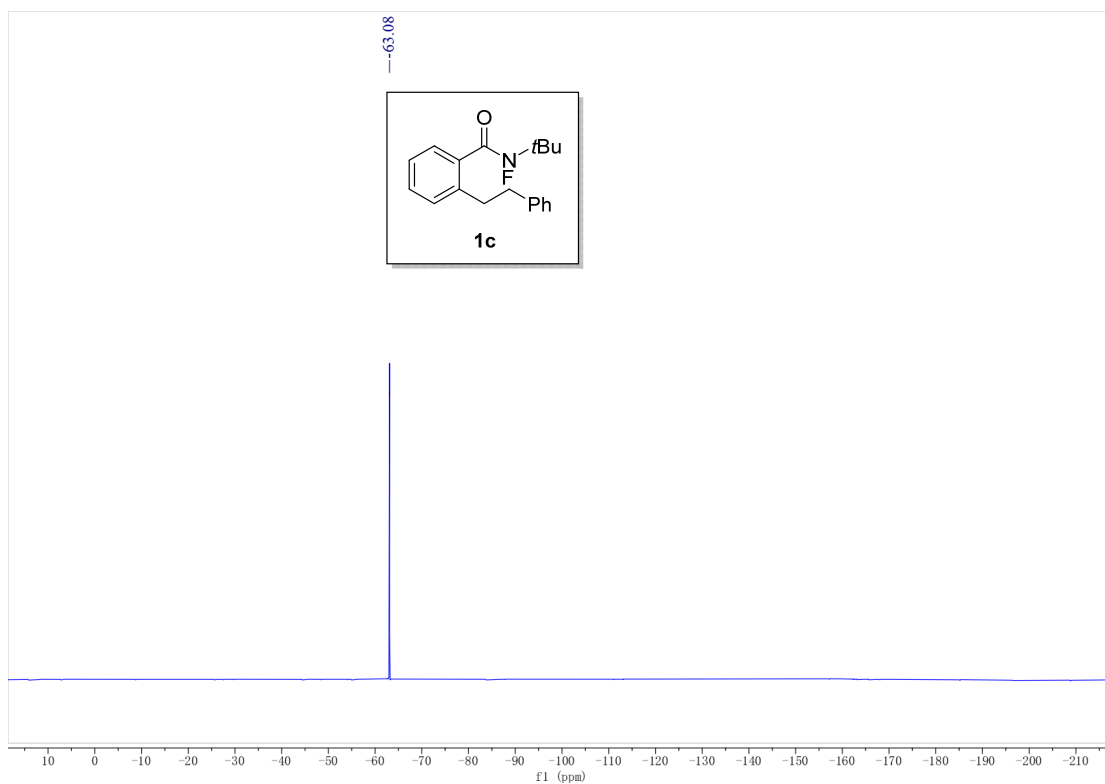

Supplementary Figure 21  $^{19}\text{F}$  NMR of **1c**

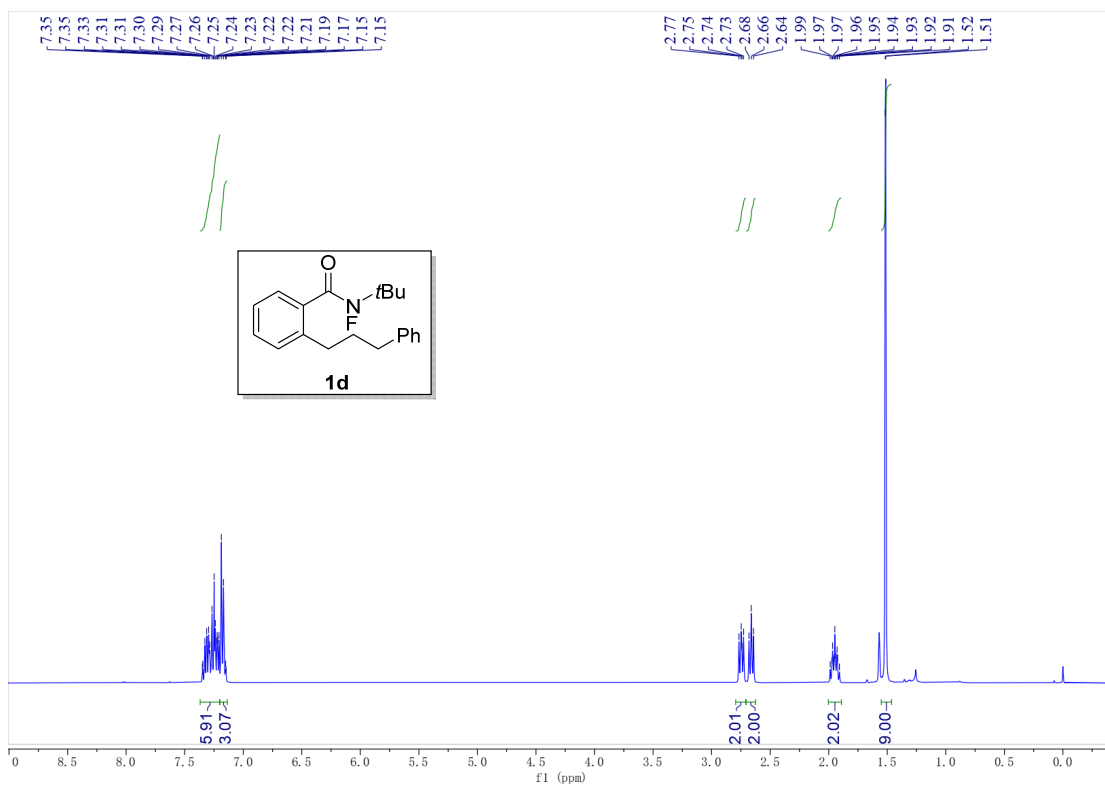

Supplementary Figure 22  $^1\text{H}$  NMR of **1d**

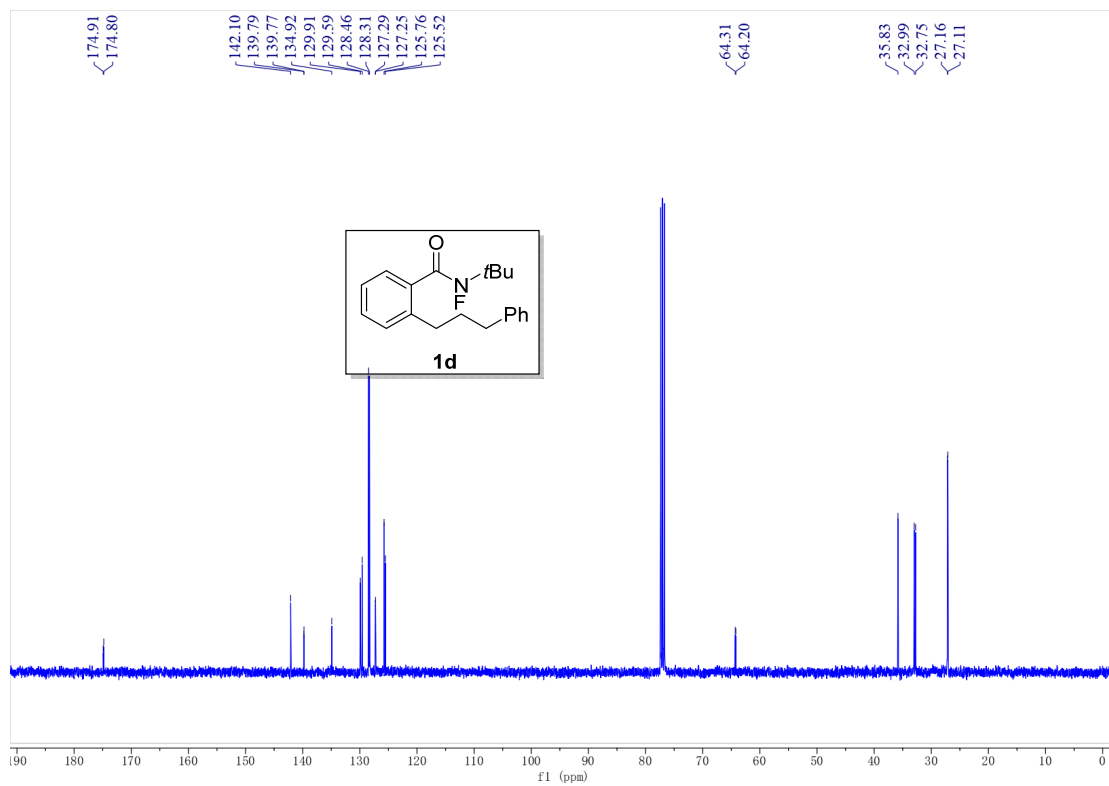

Supplementary Figure 23  $^{13}\text{C}$  NMR of **1d**

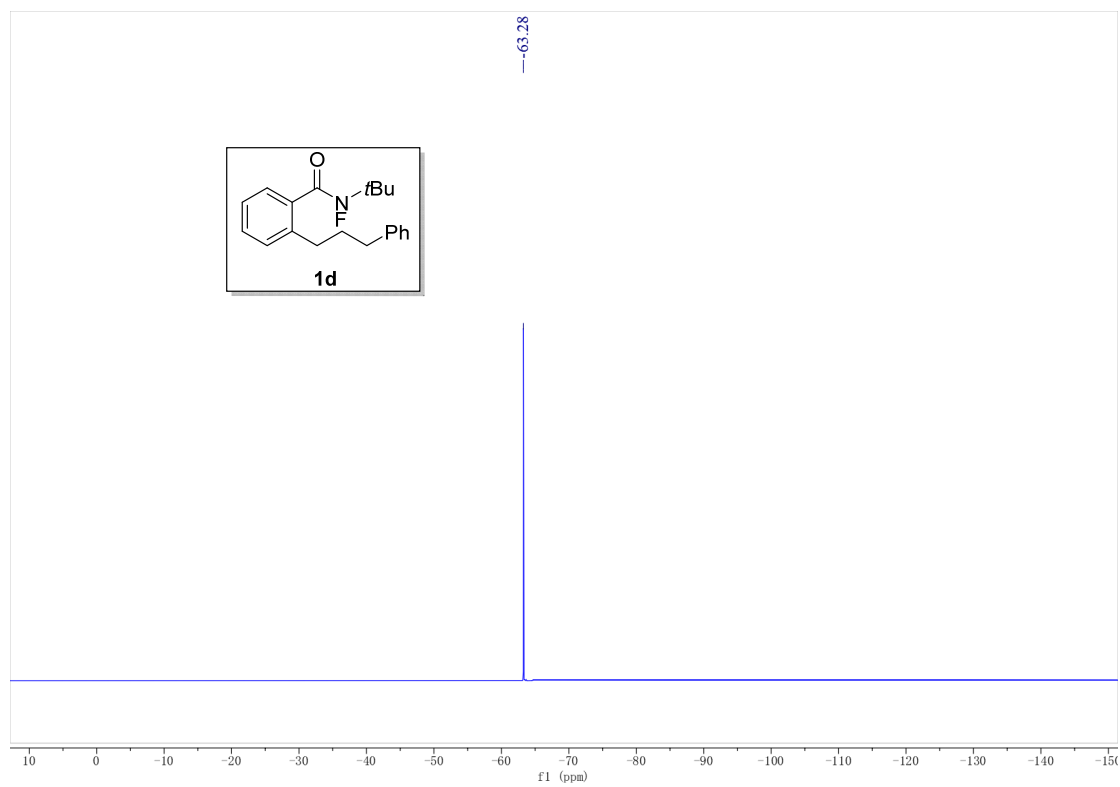

Supplementary Figure 24  $^{19}\text{F}$  NMR of **1d**

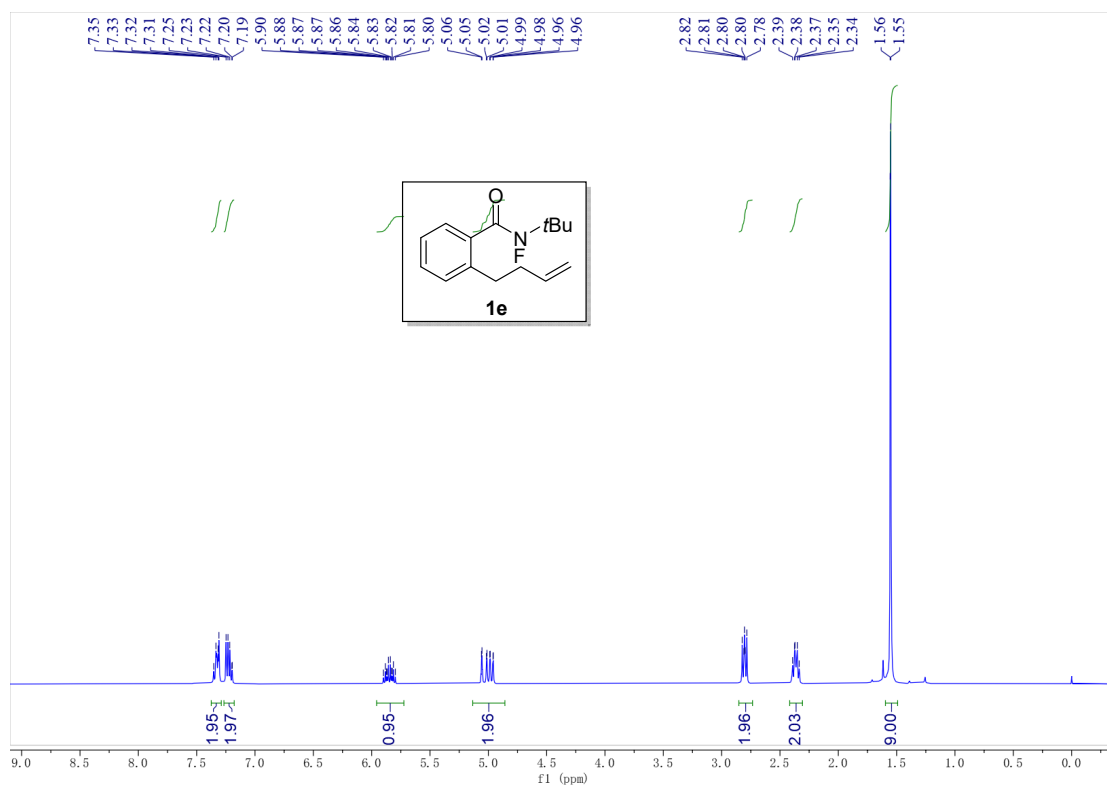

Supplementary Figure 25 <sup>1</sup>H NMR of **1e**

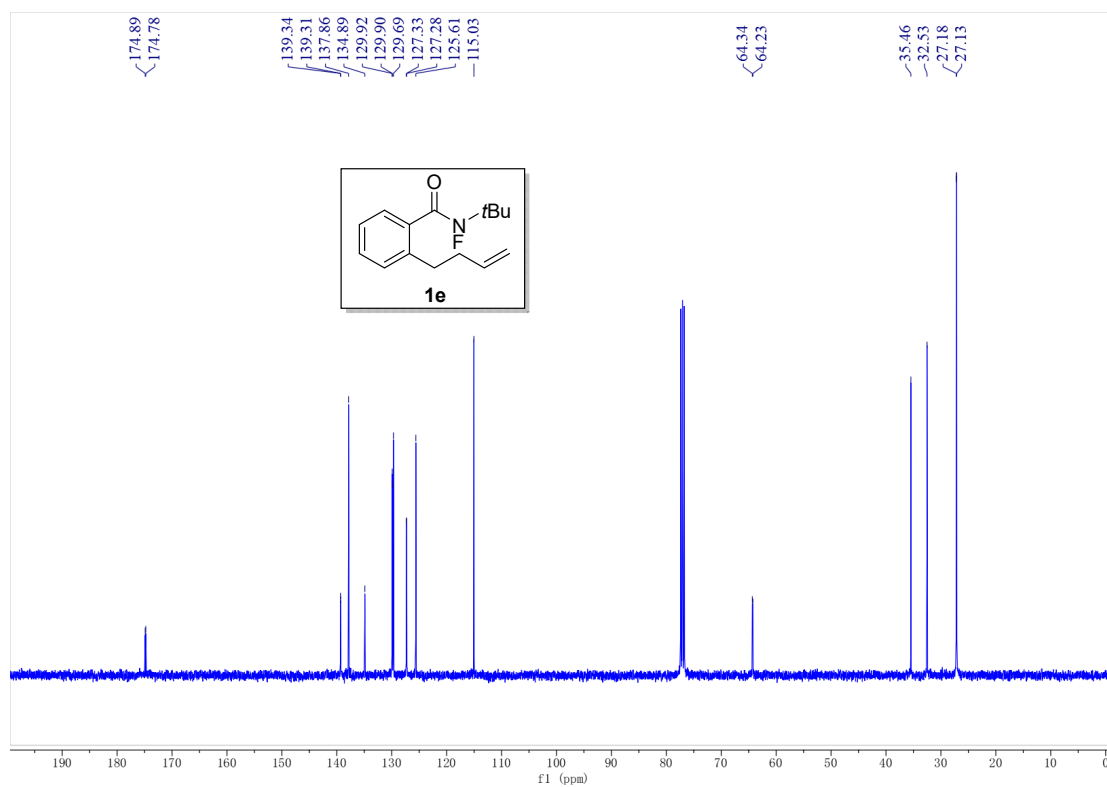

Supplementary Figure 26 <sup>13</sup>C NMR of **1e**



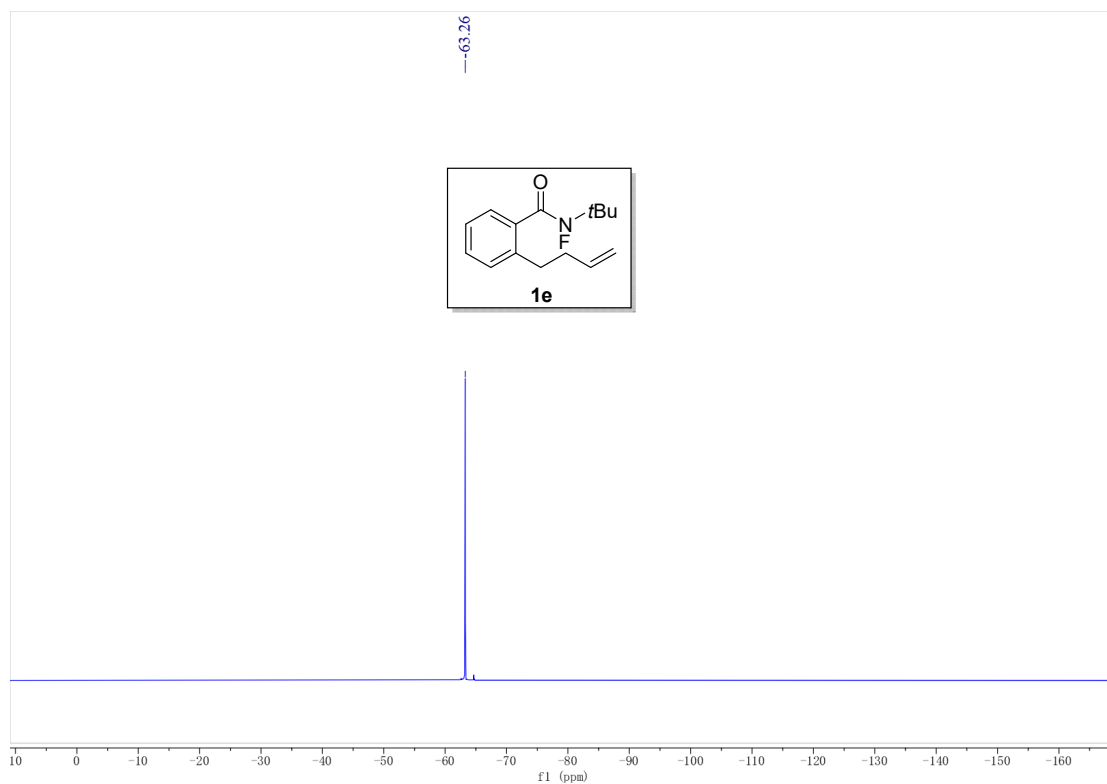

Supplementary Figure 27  $^{19}\text{F}$  NMR of **1e**

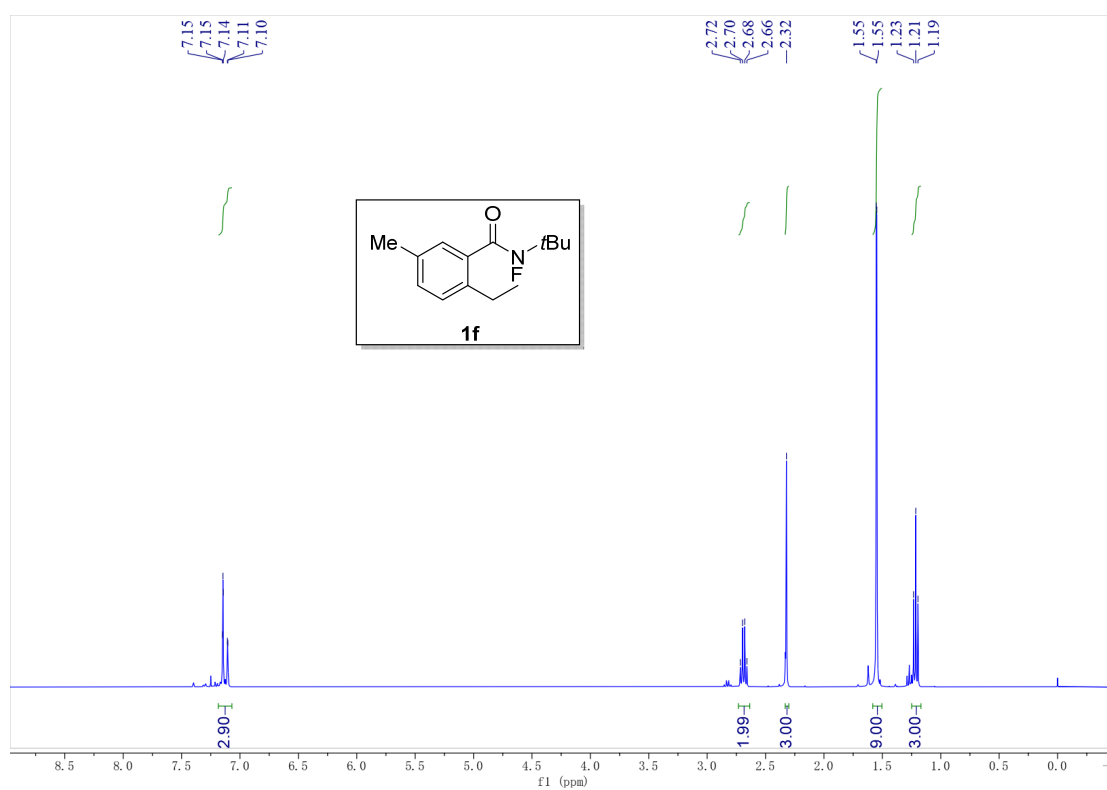

Supplementary Figure 28  $^1\text{H}$  NMR of **1f**

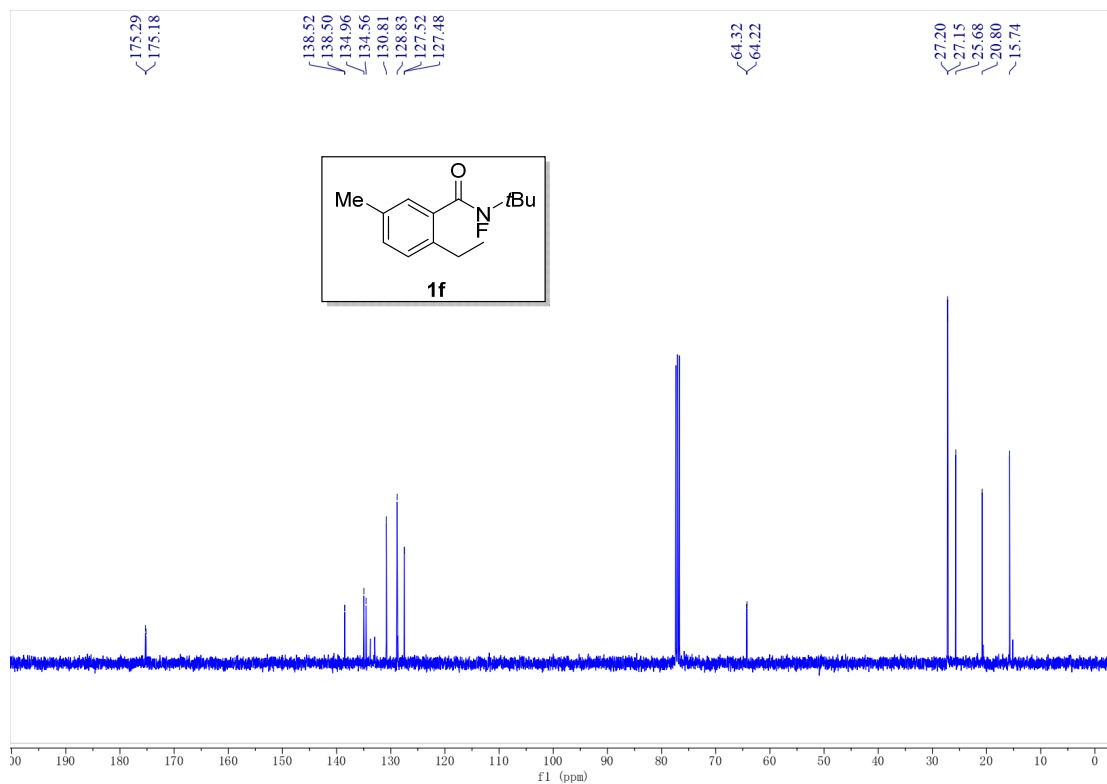

Supplementary Figure 29 <sup>13</sup>C NMR of **1f**

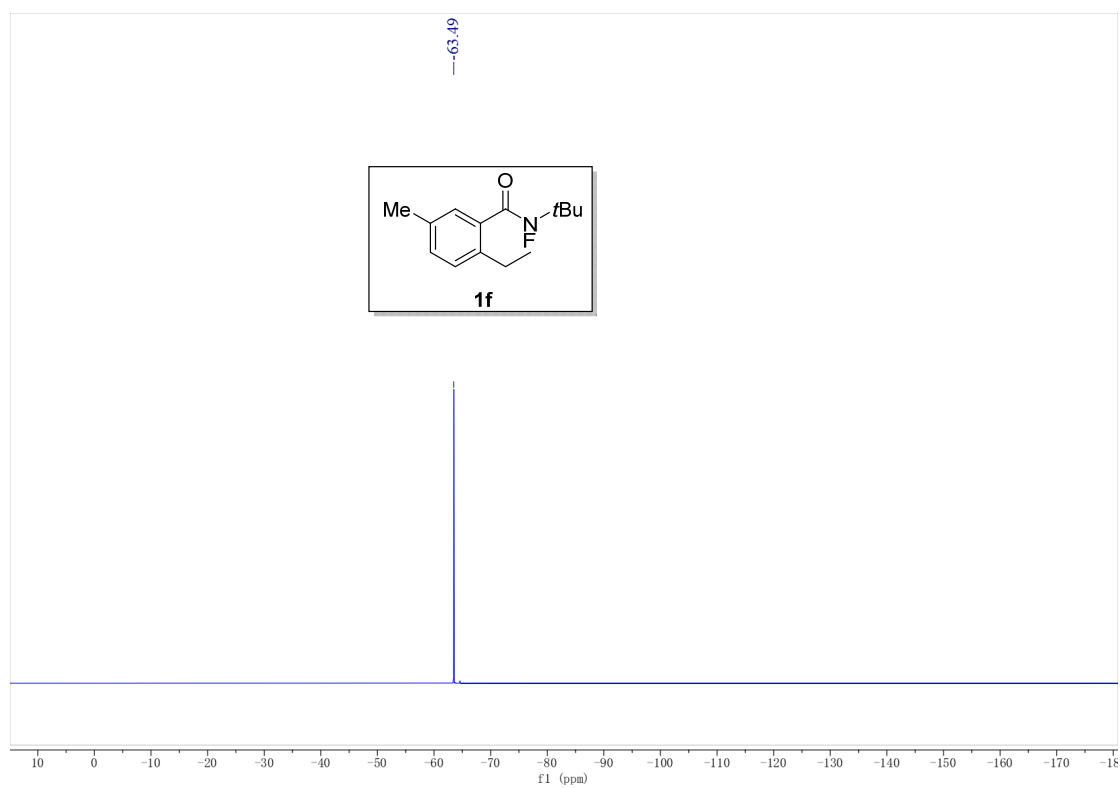

Supplementary Figure 30 <sup>19</sup>F NMR of **1f**

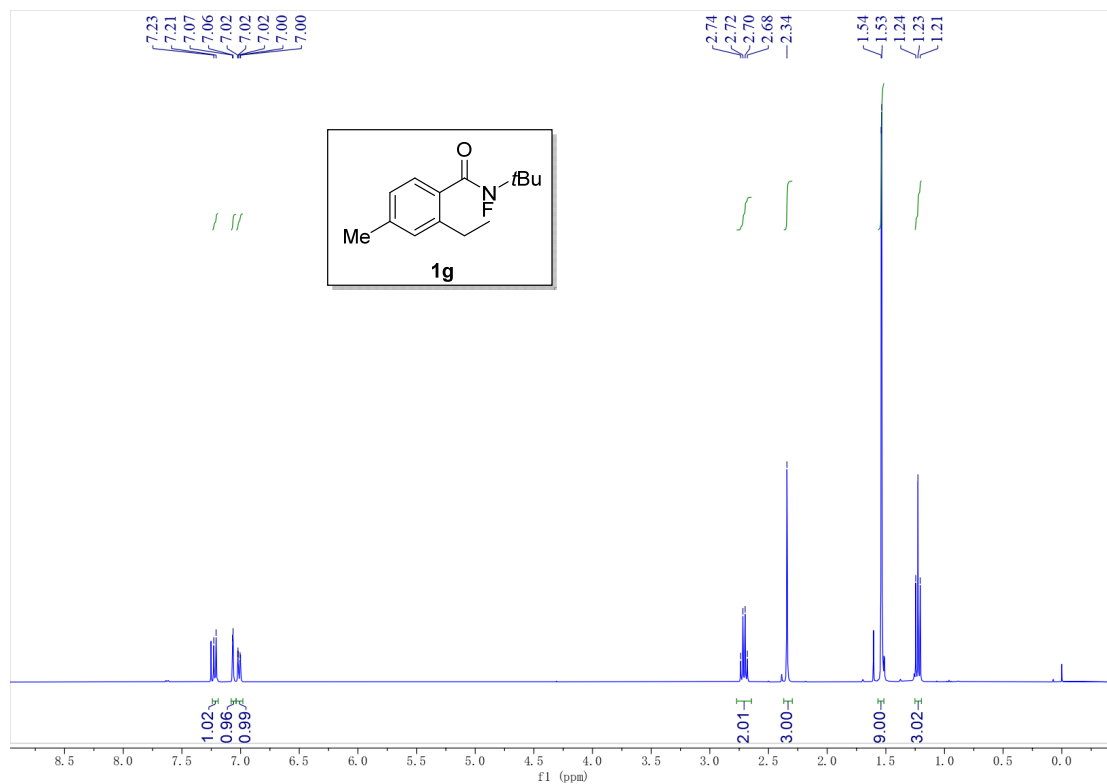

Supplementary Figure 31 <sup>1</sup>H NMR of **1g**

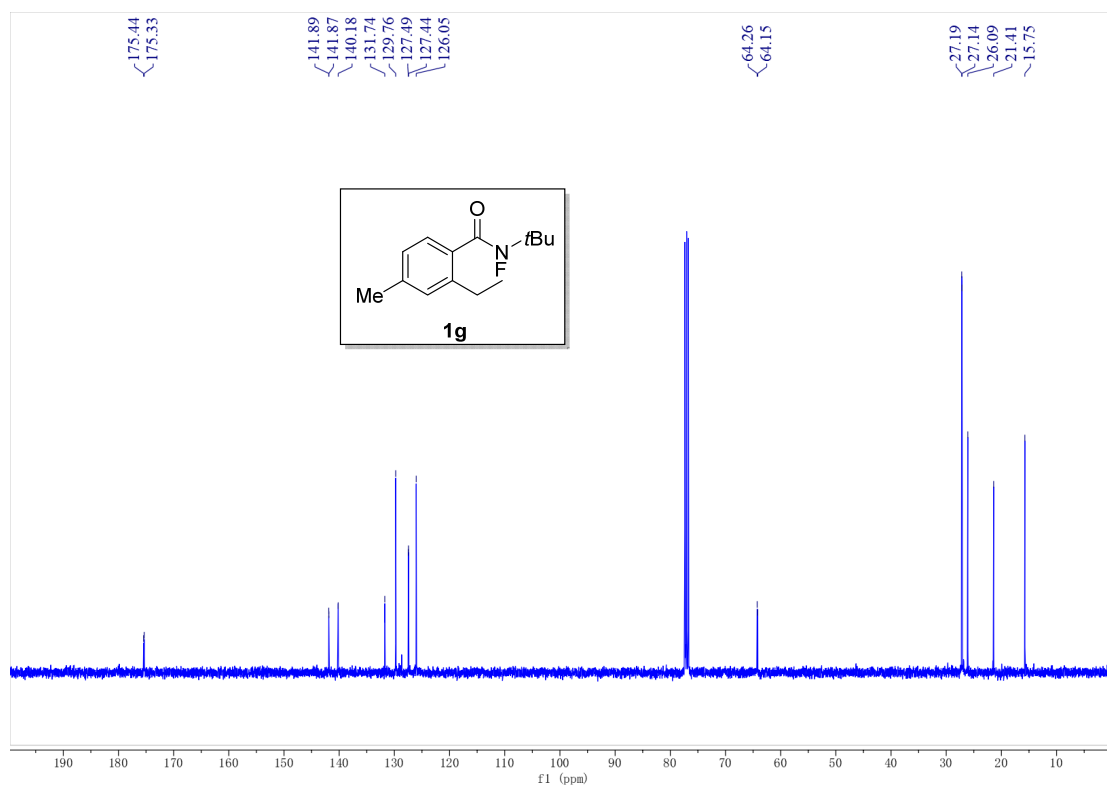

Supplementary Figure 32 <sup>13</sup>C NMR of **1g**

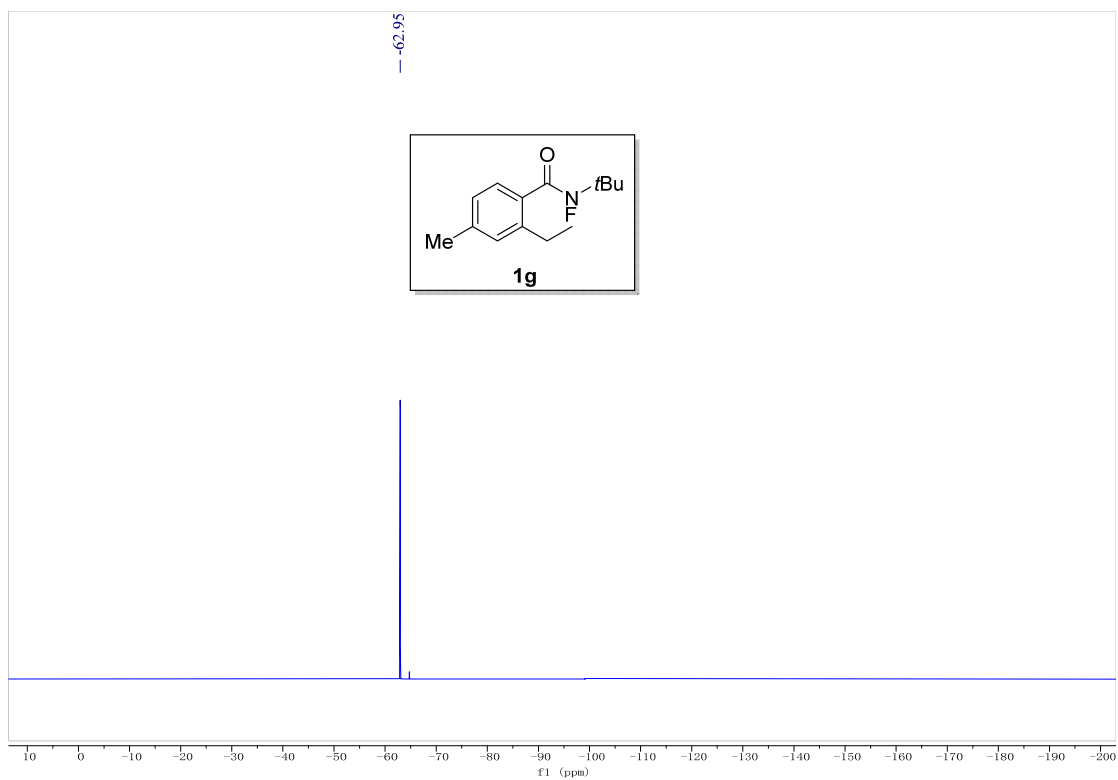

Supplementary Figure 33 <sup>19</sup>F NMR of **1g**

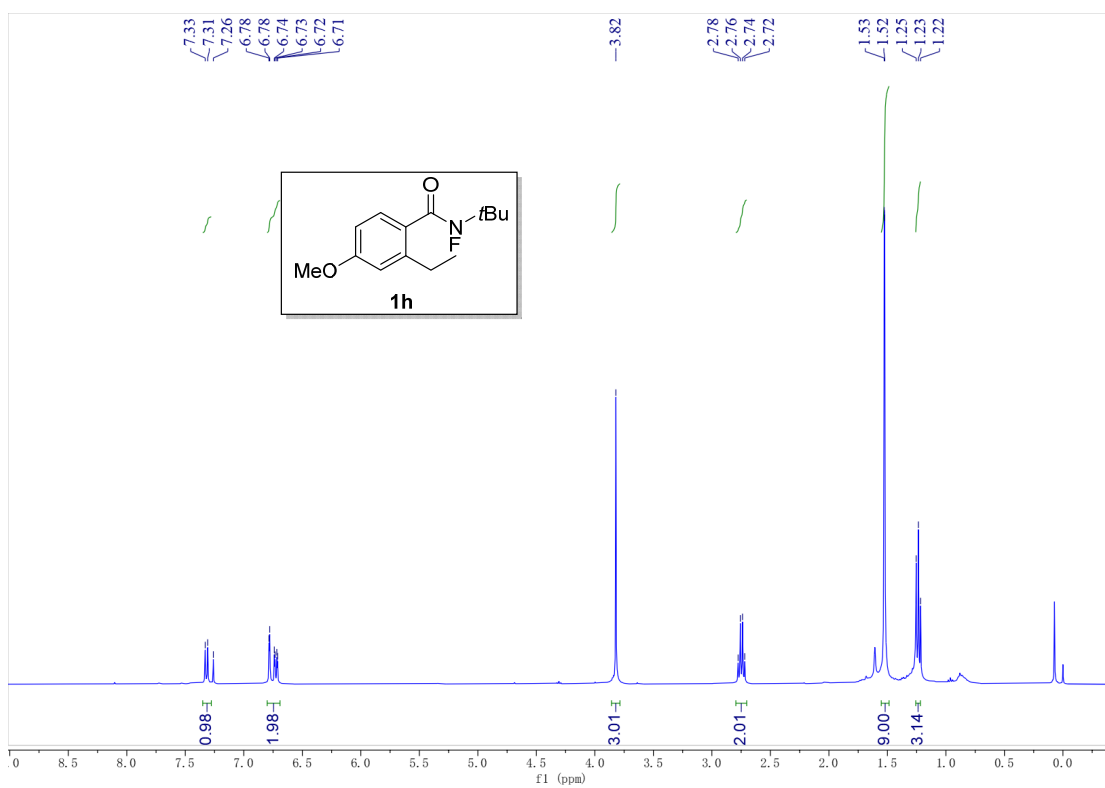

Supplementary Figure 34 <sup>1</sup>H NMR of **1h**

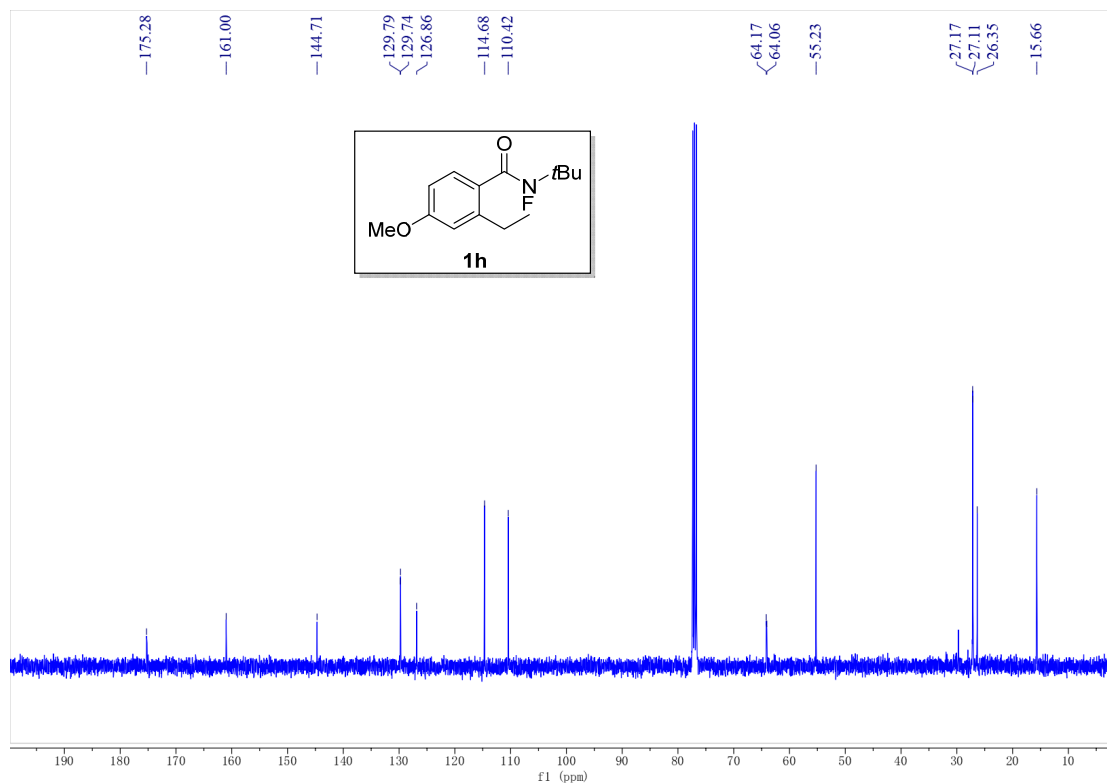

Supplementary Figure 35 <sup>13</sup>C NMR of **1h**

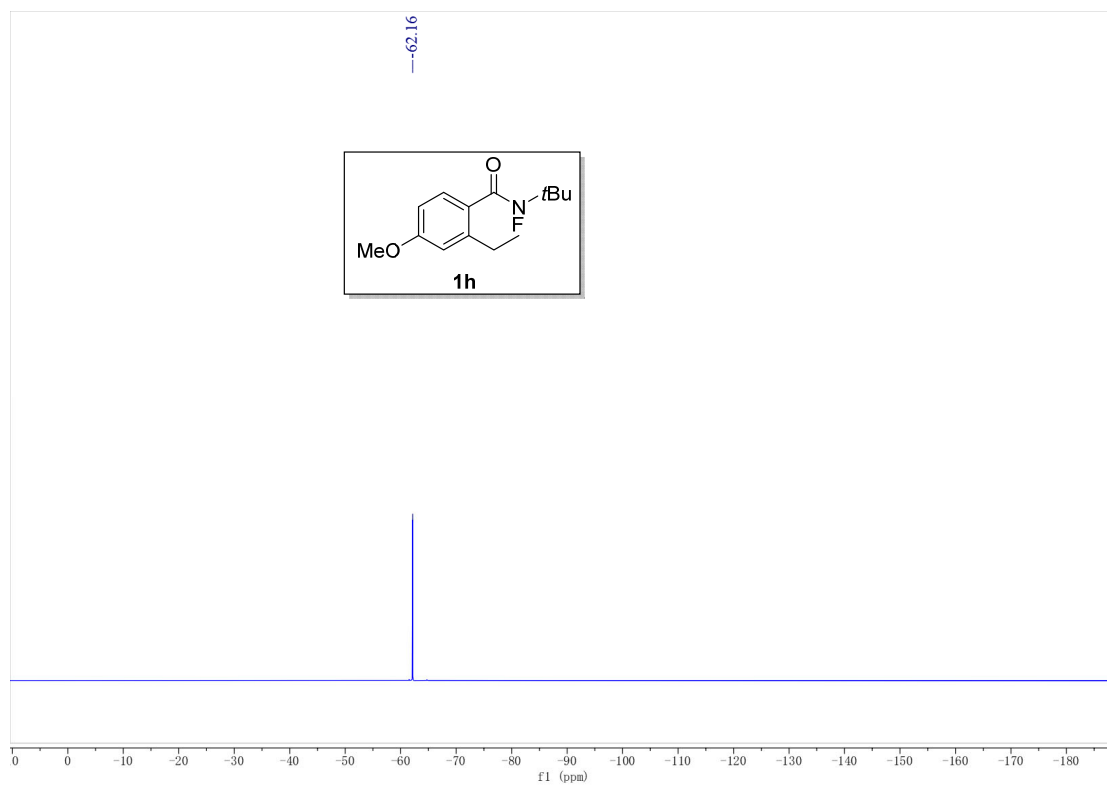

Supplementary Figure 36 <sup>19</sup>F NMR of **1h**

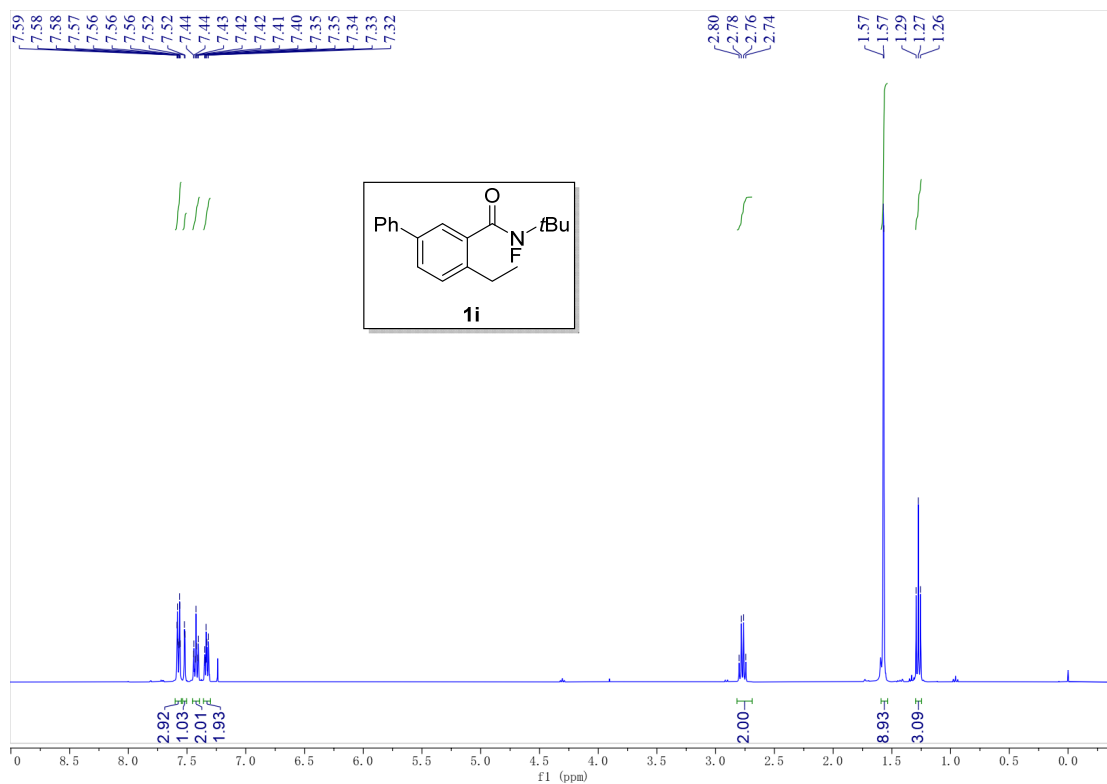

Supplementary Figure 37 <sup>1</sup>H NMR of **1i**

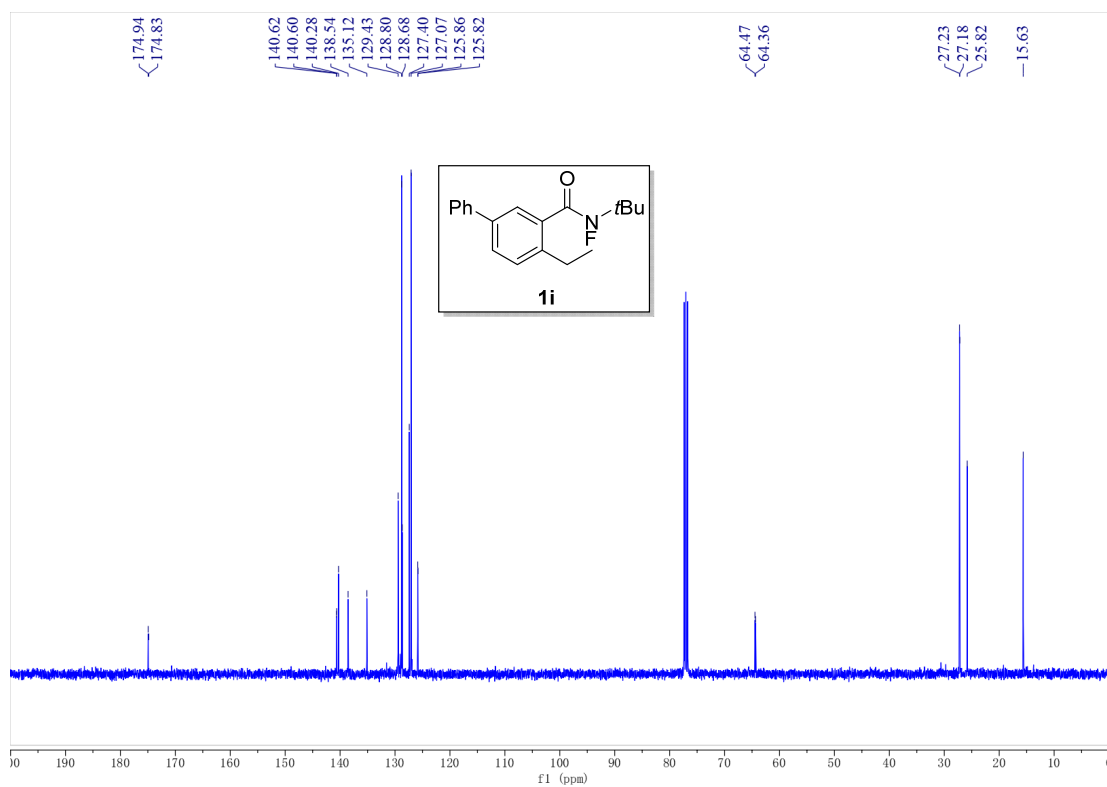

Supplementary Figure 38 <sup>13</sup>C NMR of **1i**

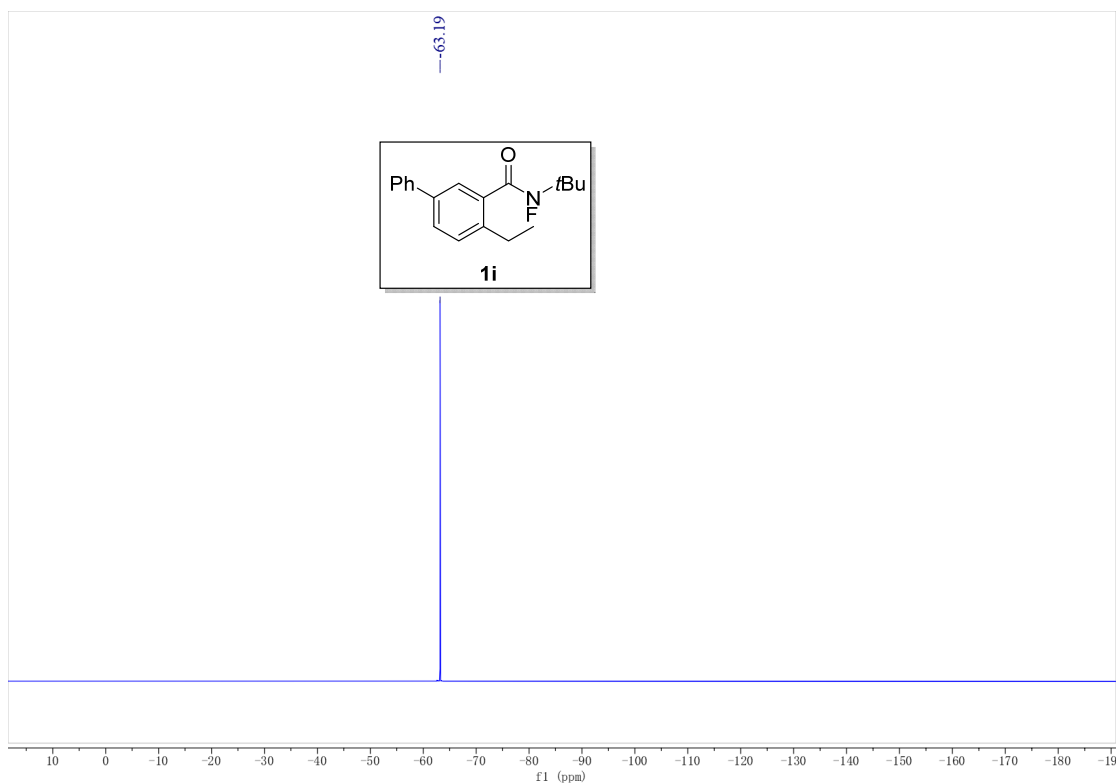

Supplementary Figure 39  $^{19}\text{F}$  NMR of **1i**

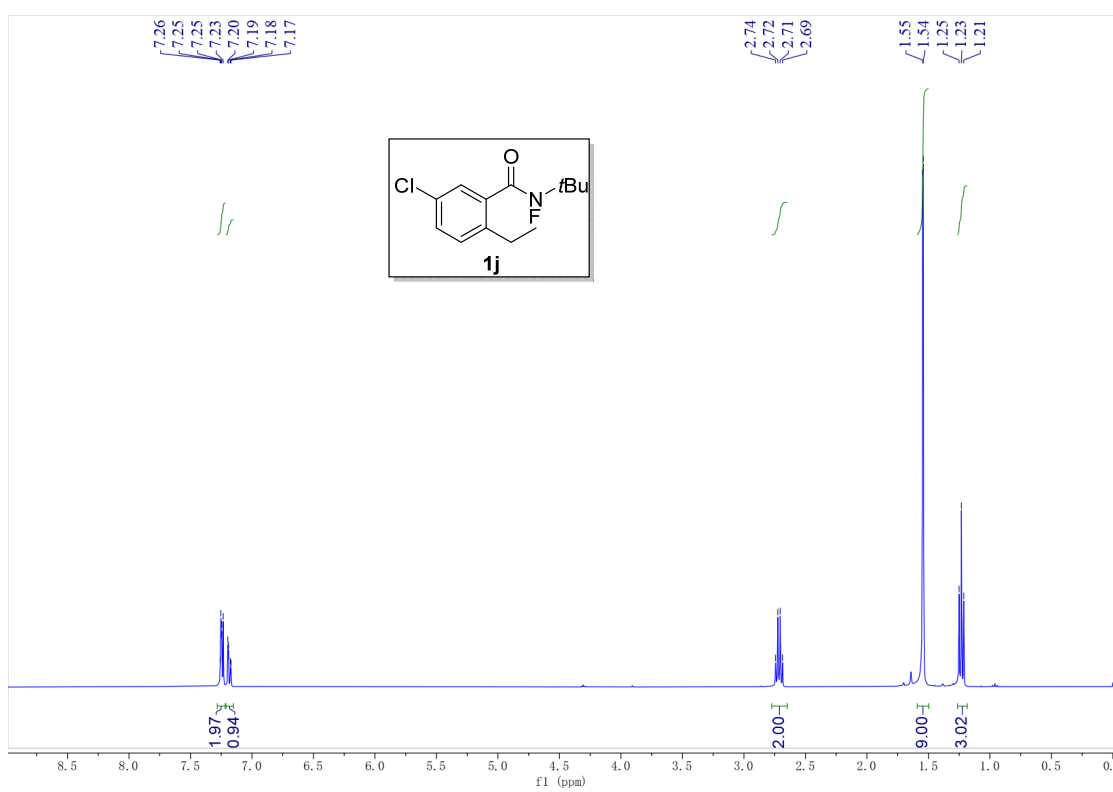

Supplementary Figure 40  $^1\text{H}$  NMR of **1j**

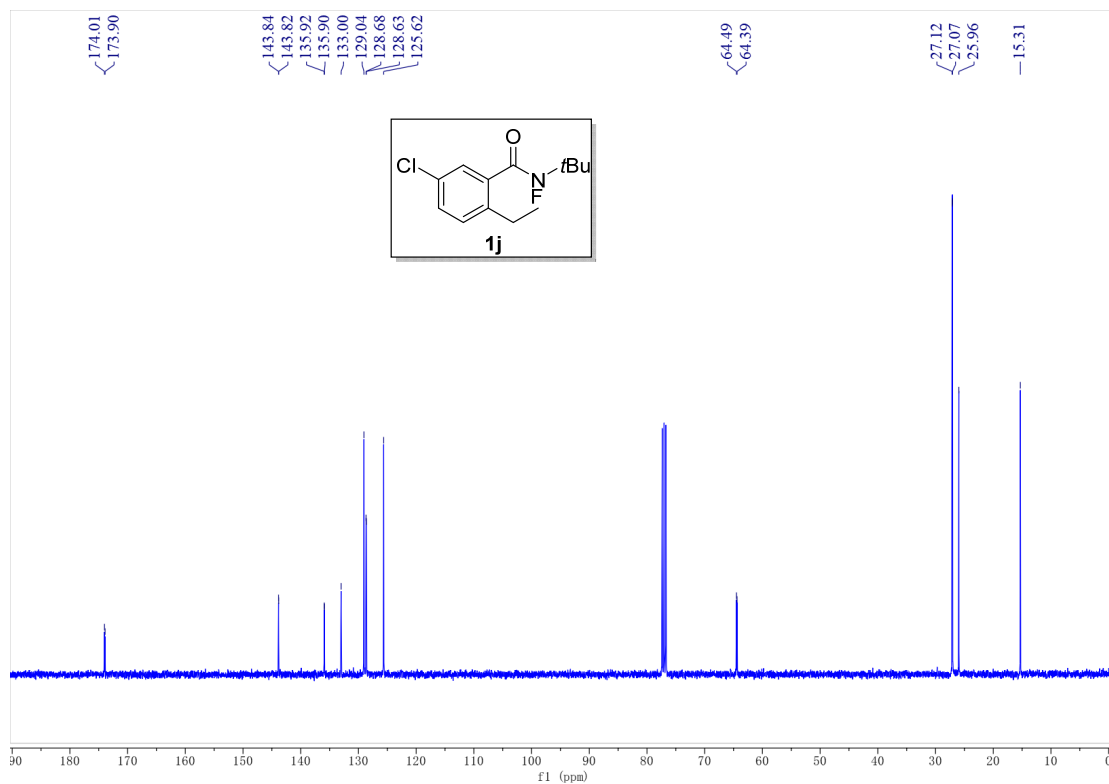

Supplementary Figure 41 <sup>13</sup>C NMR of **1j**

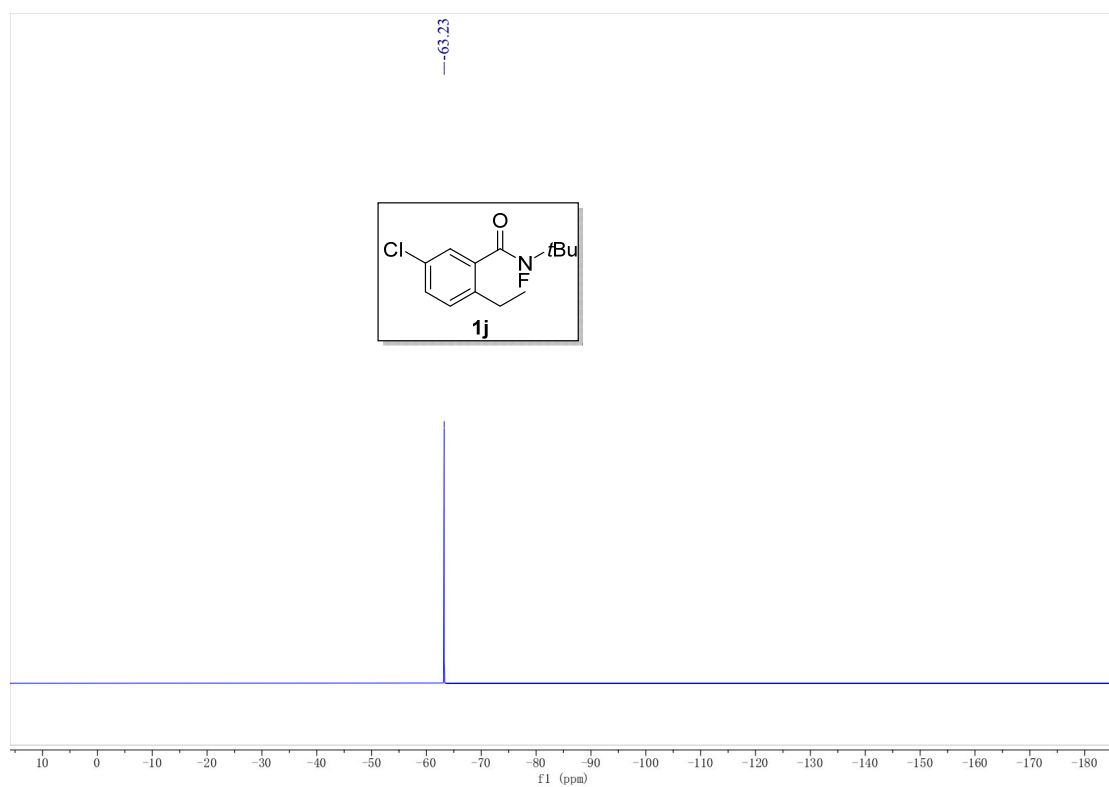

Supplementary Figure 42 <sup>19</sup>F NMR of **1j**



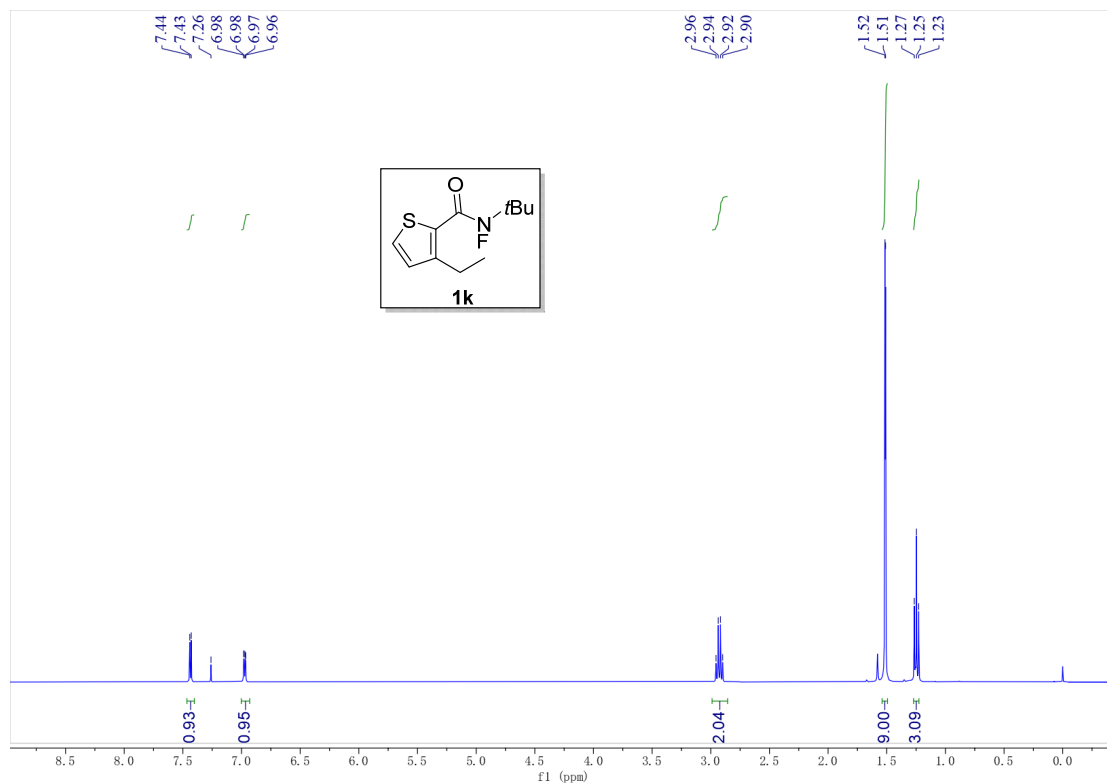

Supplementary Figure 43  $^1\text{H}$  NMR of **1k**

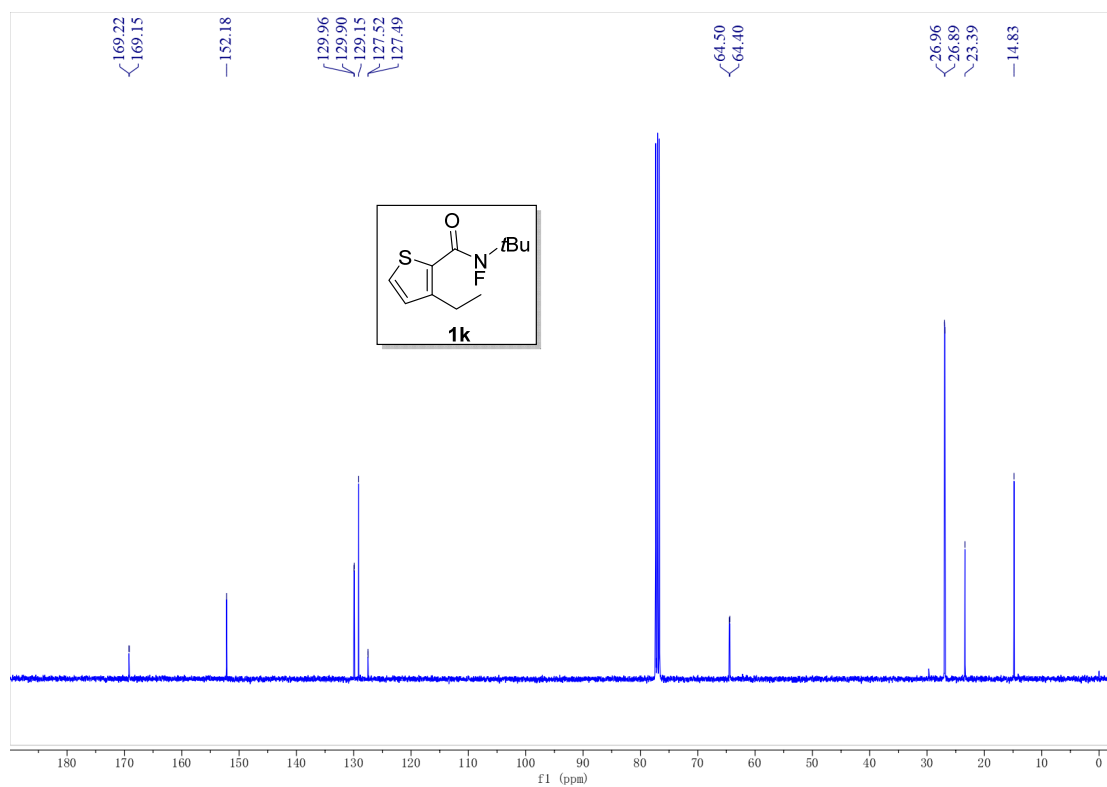

Supplementary Figure 44  $^{13}\text{C}$  NMR of **1k**

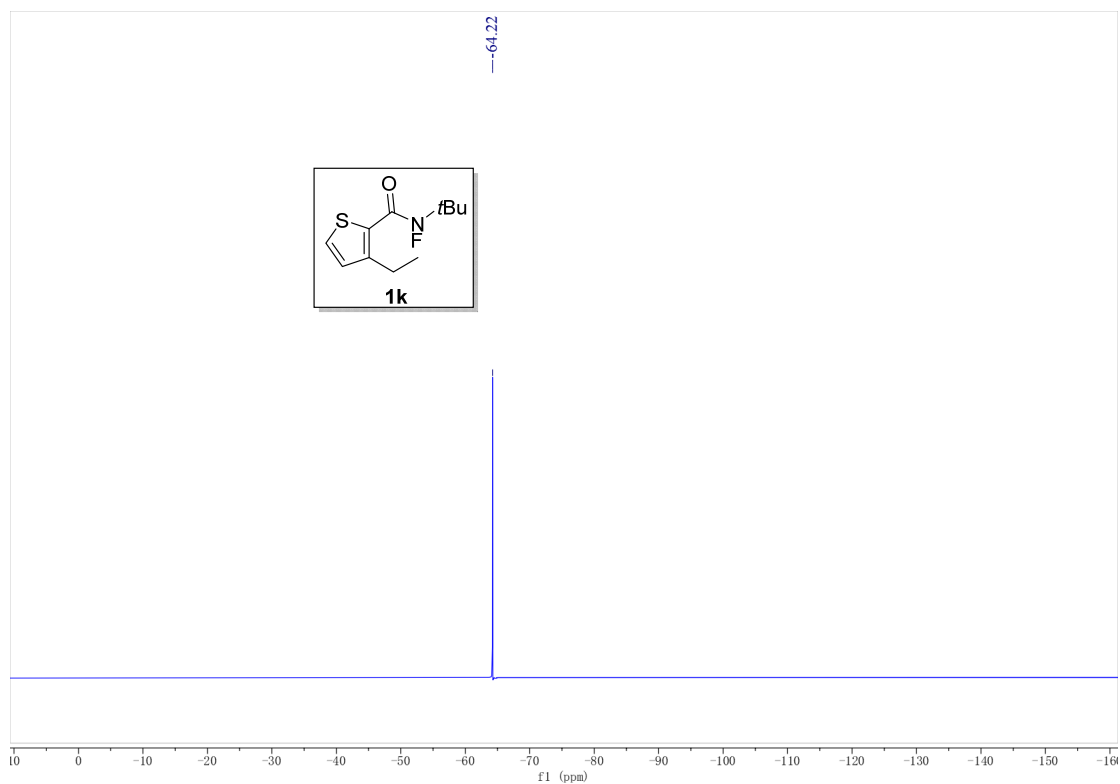

Supplementary Figure 45  $^{19}\text{F}$  NMR of **1k**

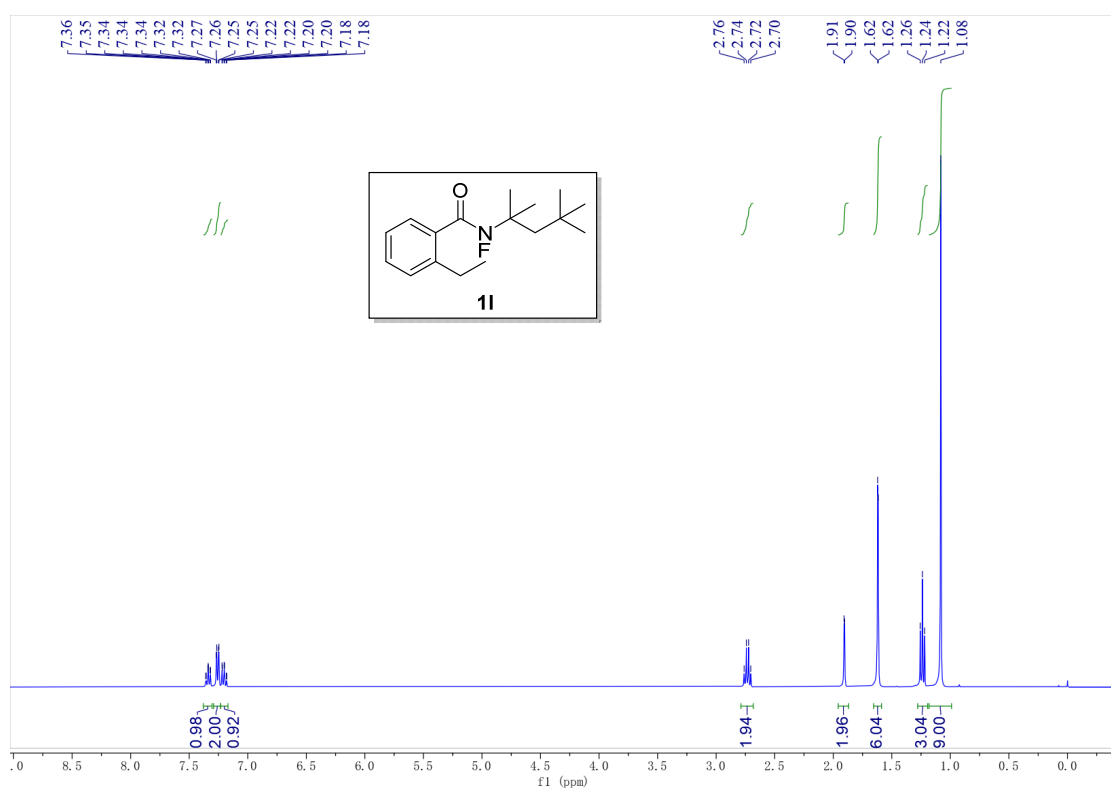

Supplementary Figure 46  $^1\text{H}$  NMR of **1l**

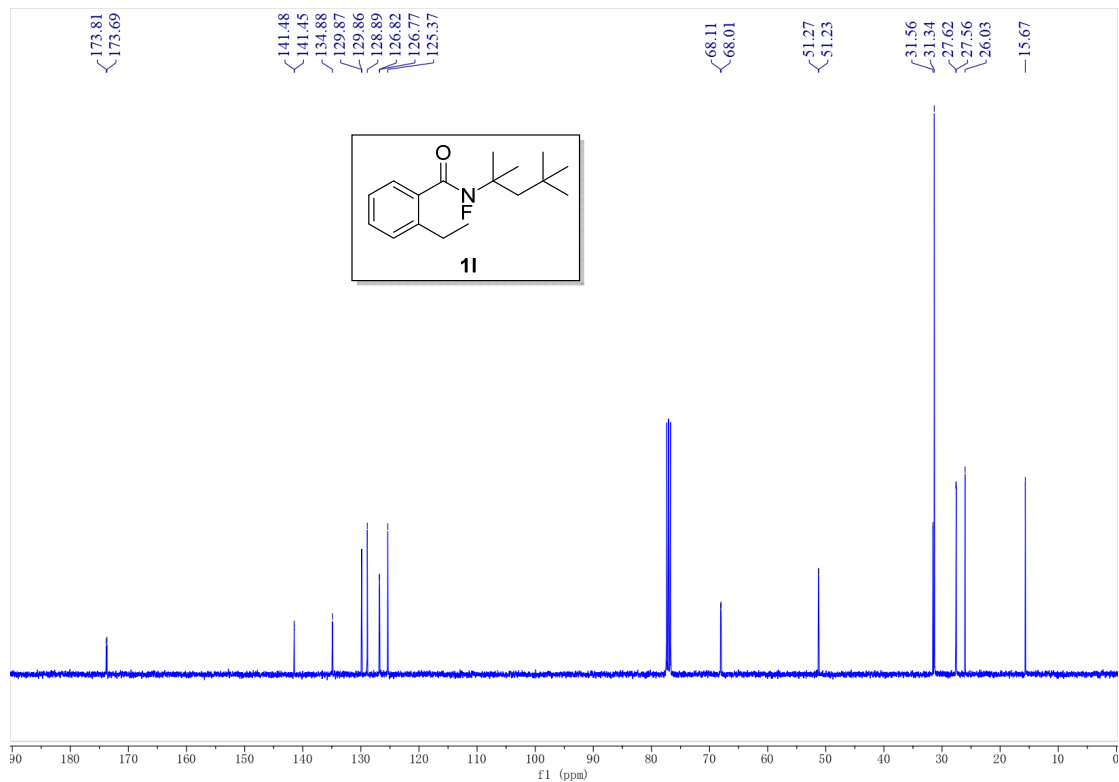

Supplementary Figure 47 <sup>13</sup>C NMR of **11**

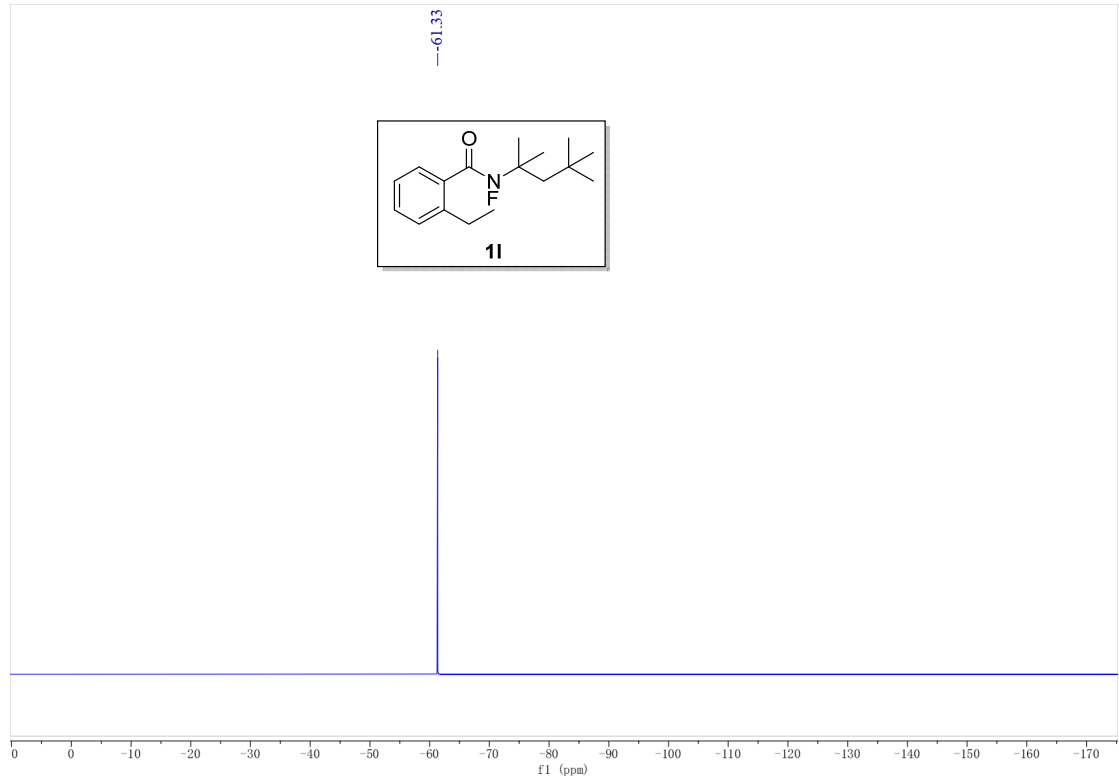

Supplementary Figure 48 <sup>19</sup>F NMR of **11**

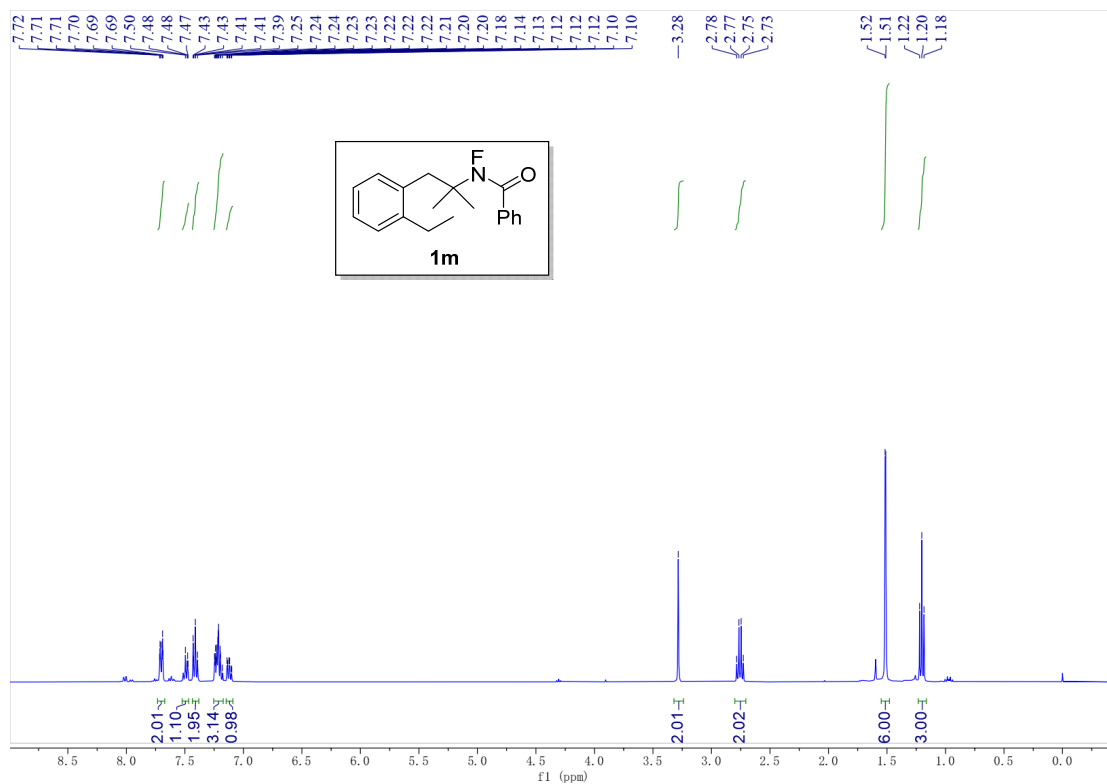

Supplementary Figure 49 <sup>1</sup>H NMR of **1m**

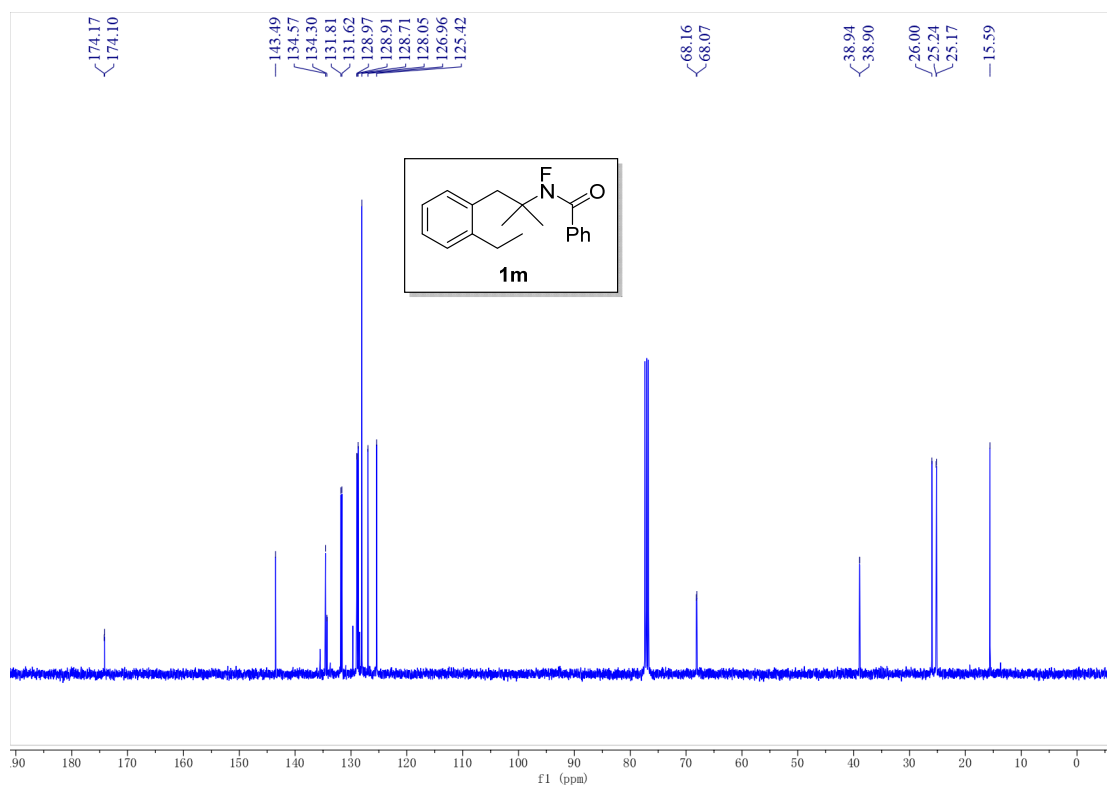

Supplementary Figure 50 <sup>13</sup>C NMR of **1m**

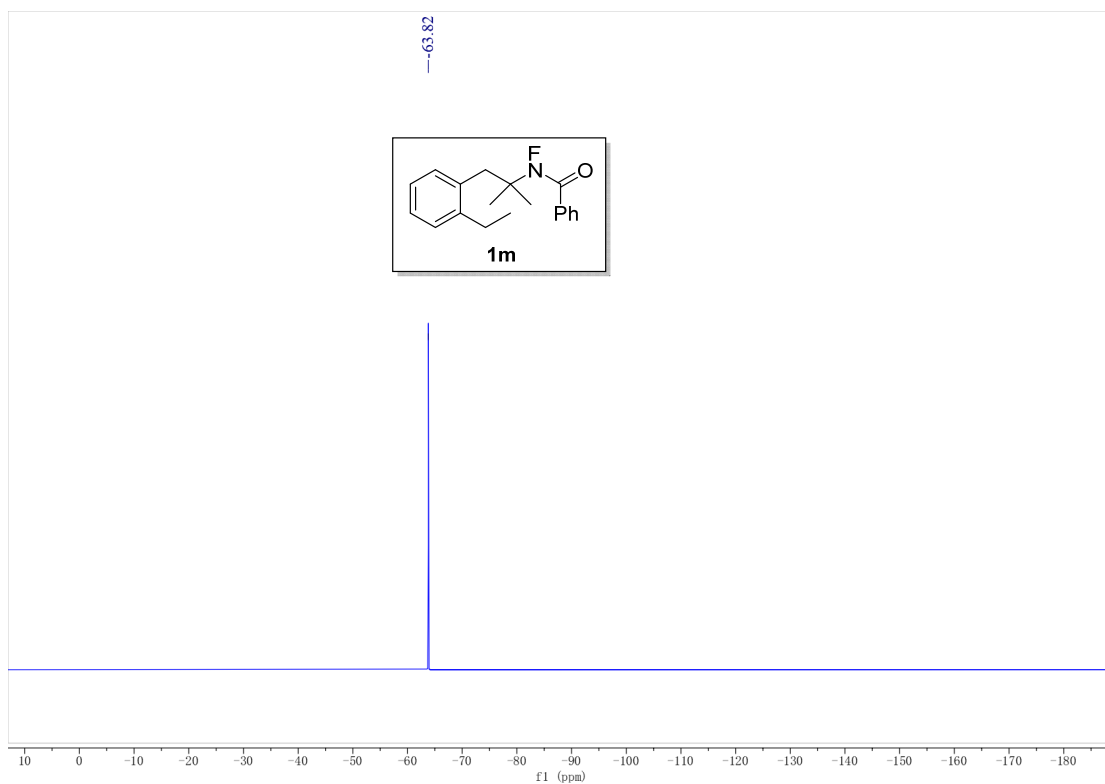

Supplementary Figure 51  $^{19}\text{F}$  NMR of **1m**

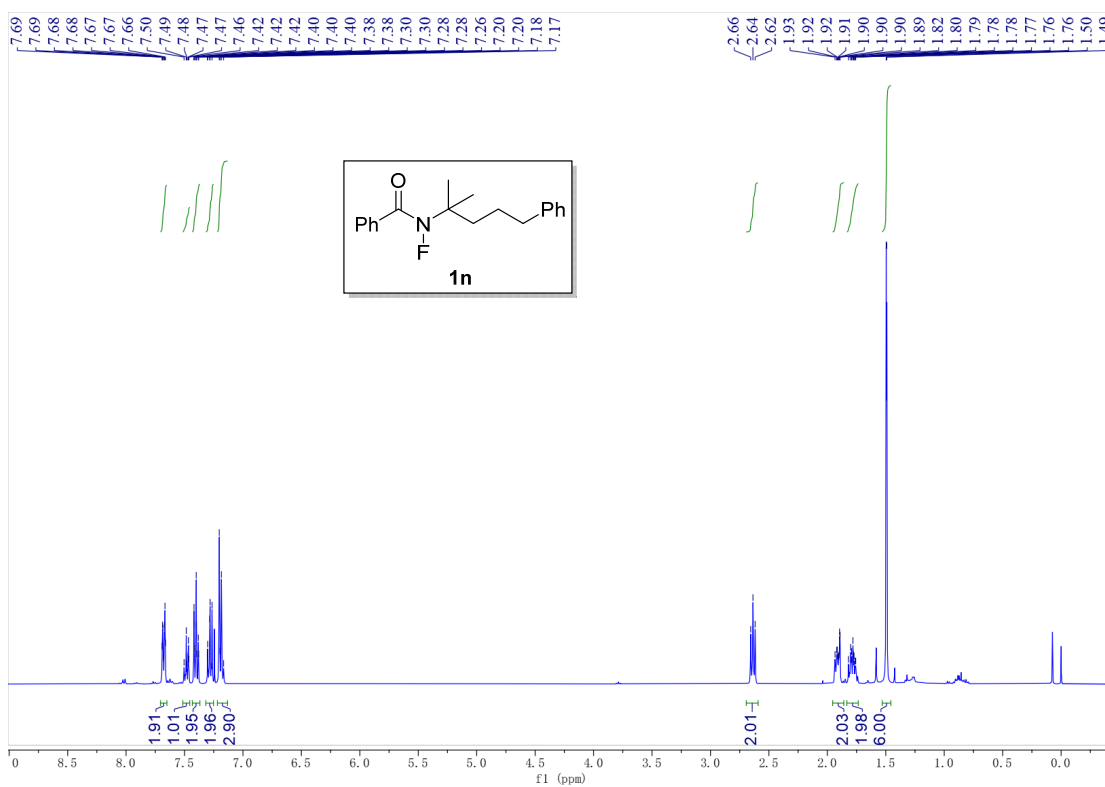

Supplementary Figure 52  $^1\text{H}$  NMR of **1n**

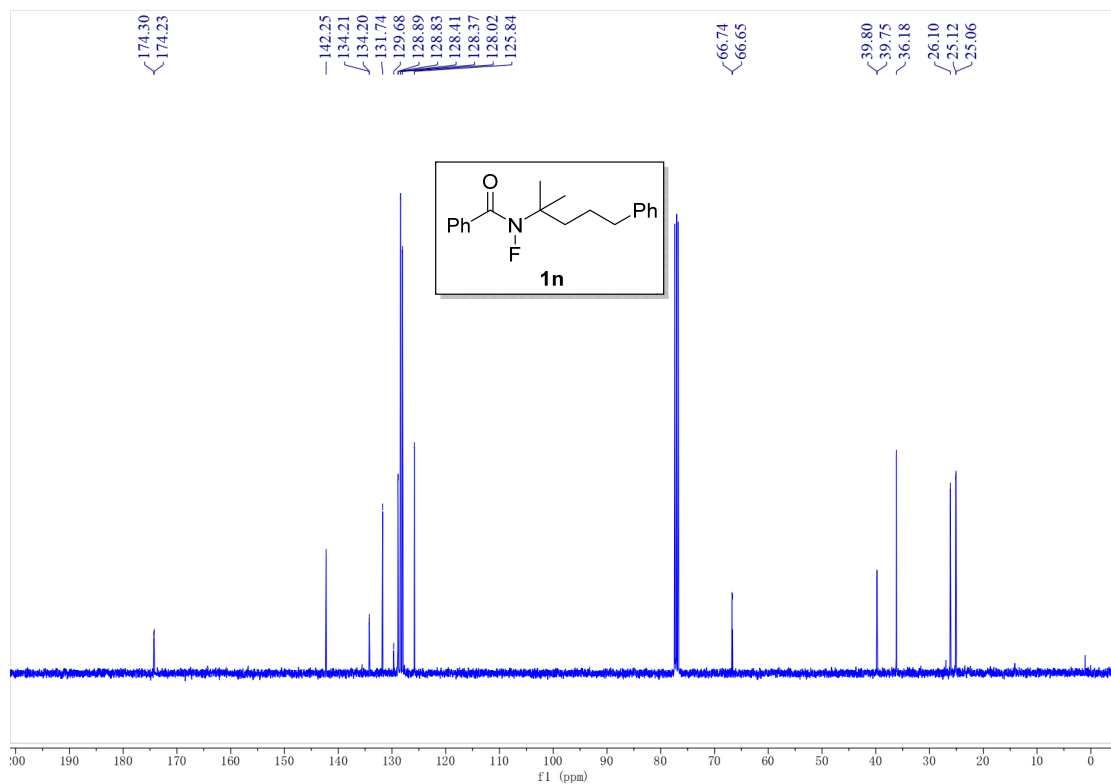

Supplementary Figure 53 <sup>13</sup>C NMR of **1n**

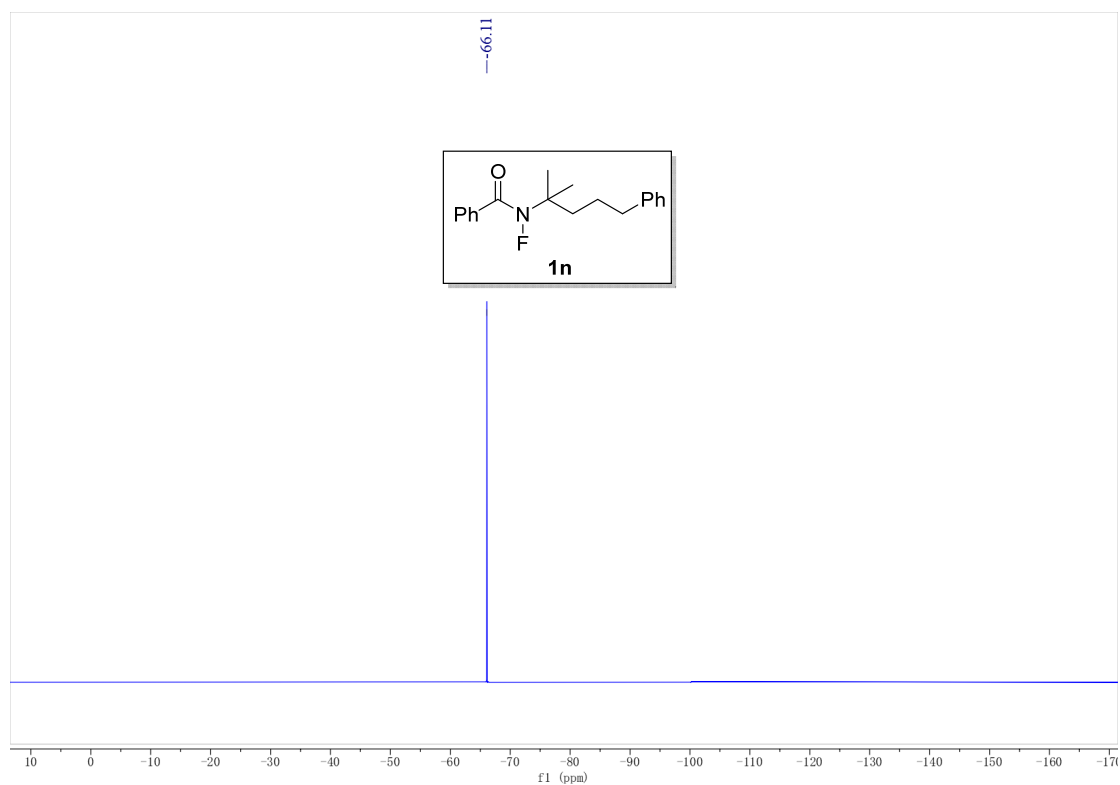

Supplementary Figure 54 <sup>19</sup>F NMR of **1n**

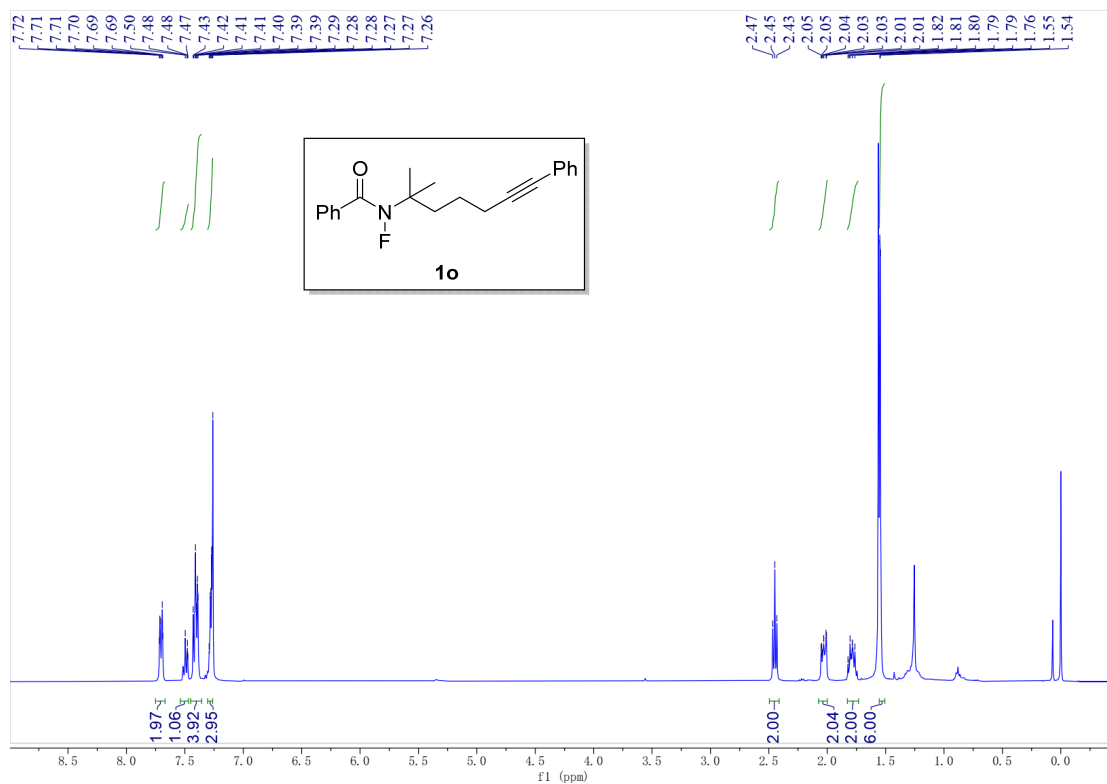

**Supplementary Figure 55**  $^1\text{H}$  NMR of **1o**

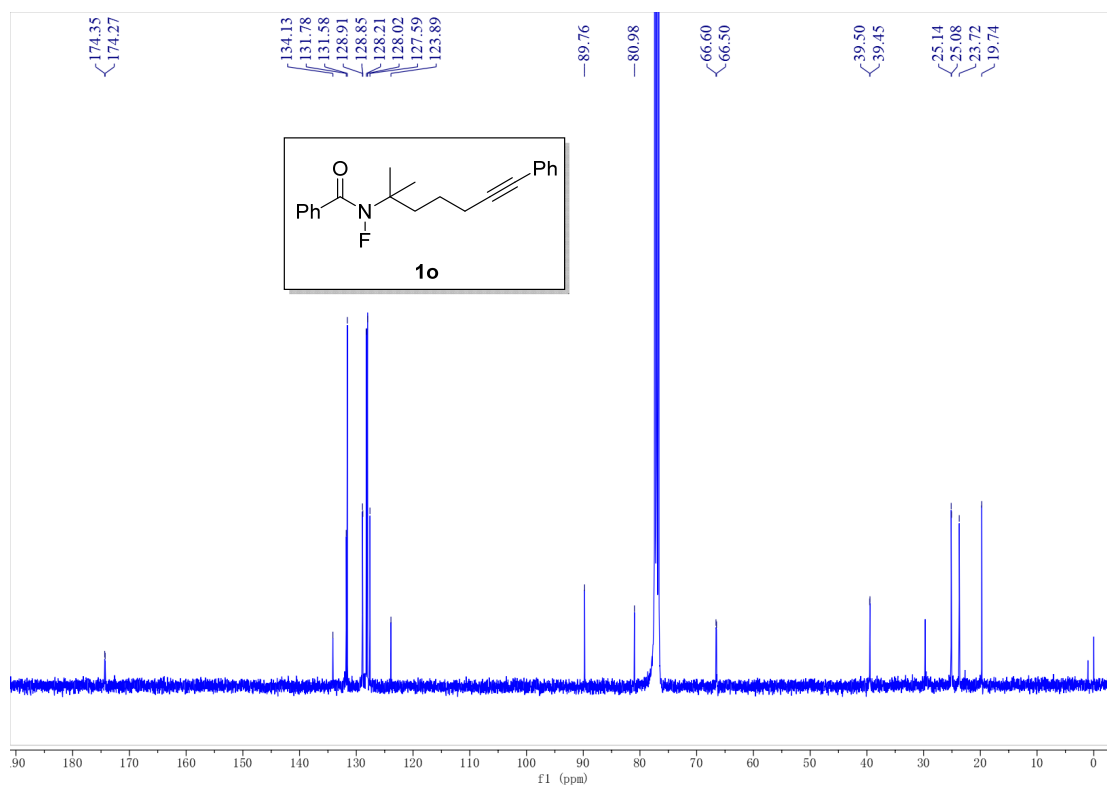

**Supplementary Figure 56**  $^{13}\text{C}$  NMR of **1o**

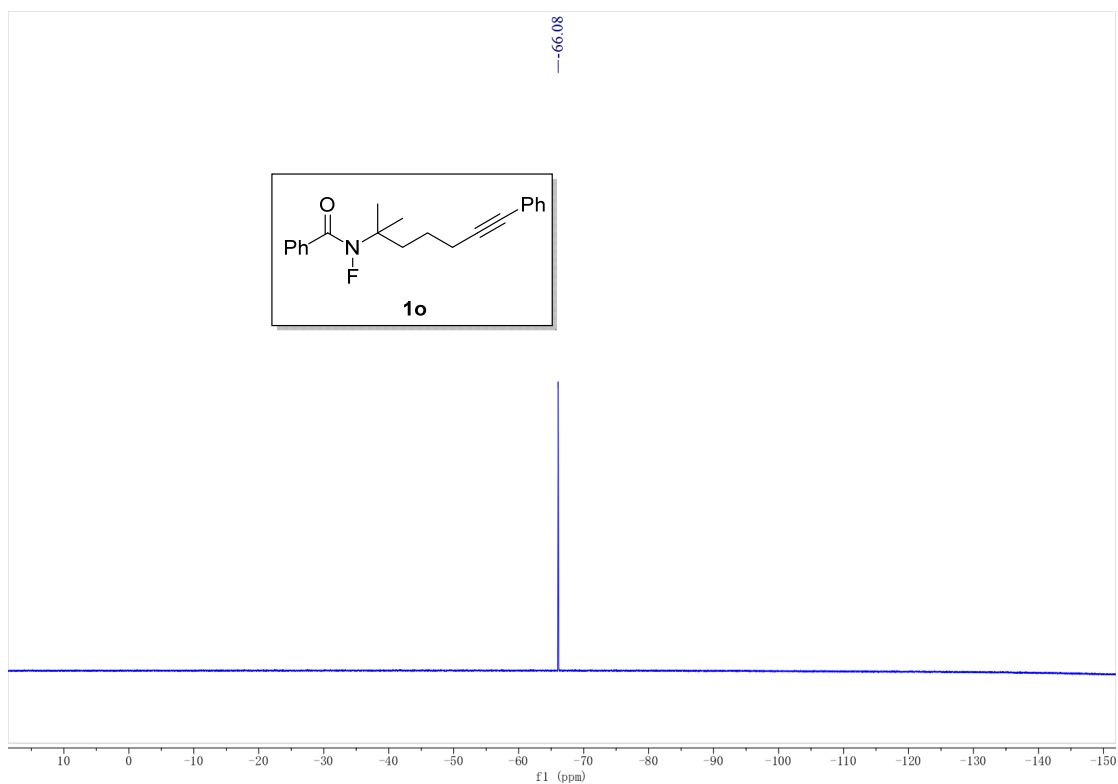

Supplementary Figure 57  $^{19}\text{F}$  NMR of **1o**

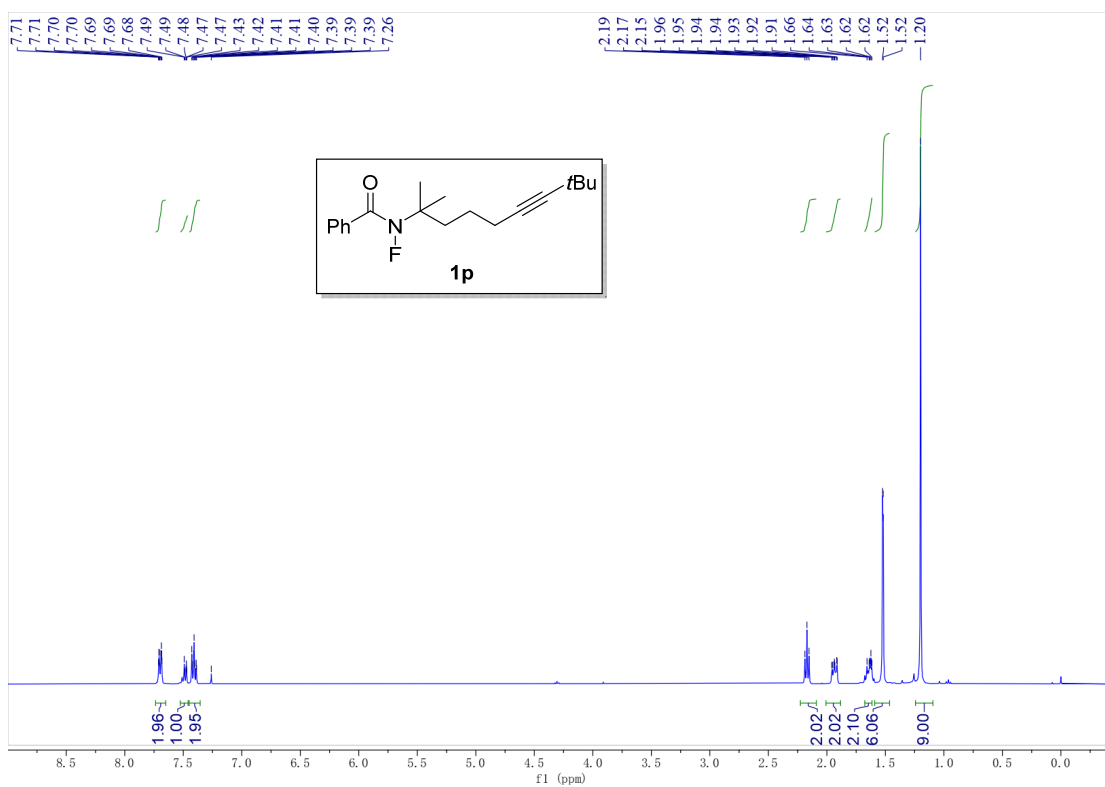

Supplementary Figure 58  $^1\text{H}$  NMR of **1p**



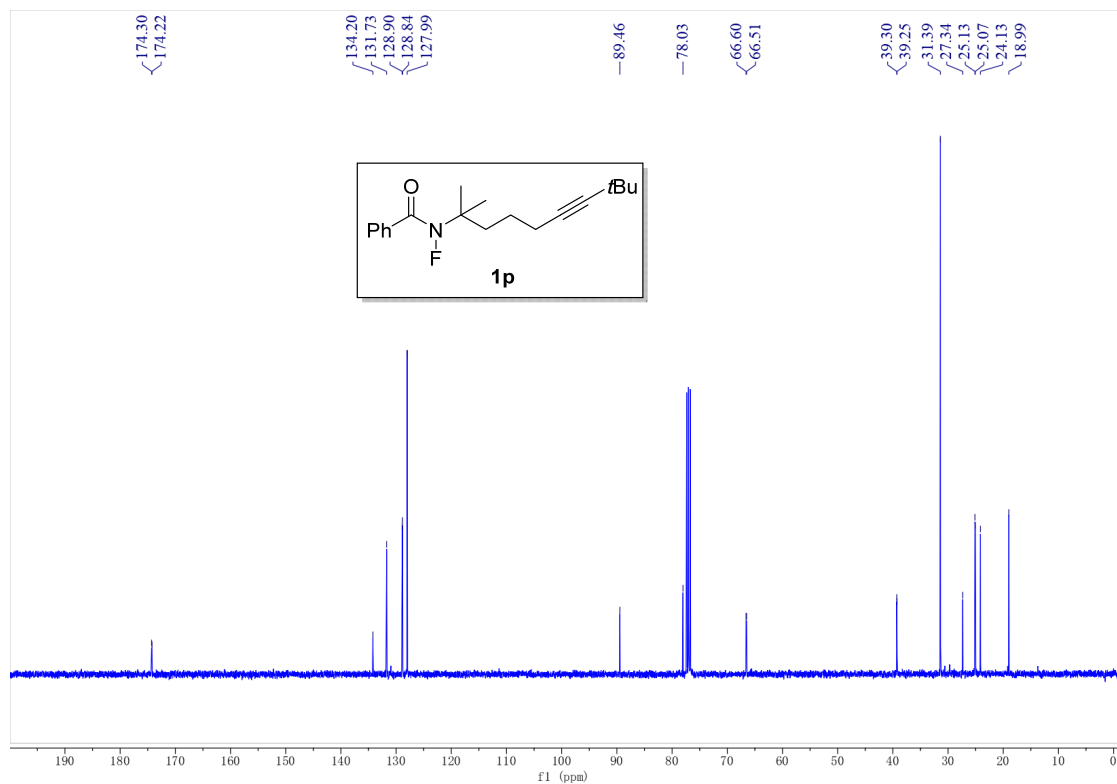

Supplementary Figure 59  $^{13}\text{C}$  NMR of **1p**

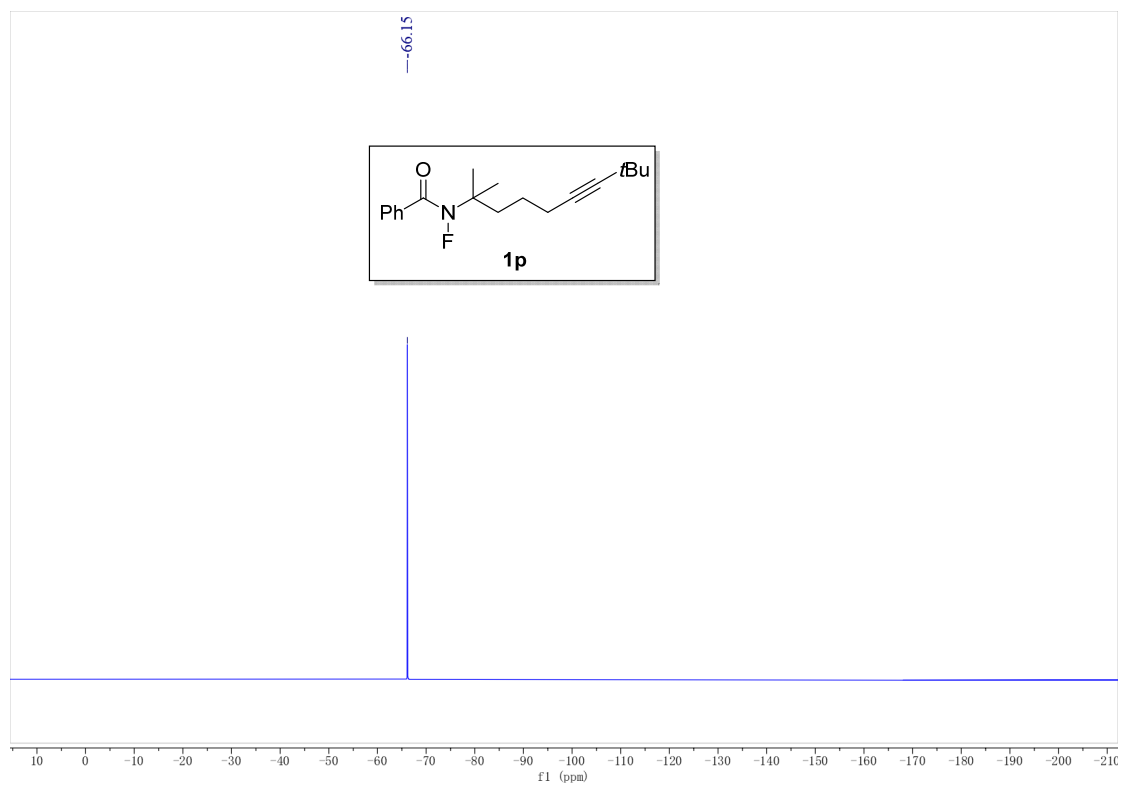

Supplementary Figure 60  $^{19}\text{F}$  NMR of **1p**

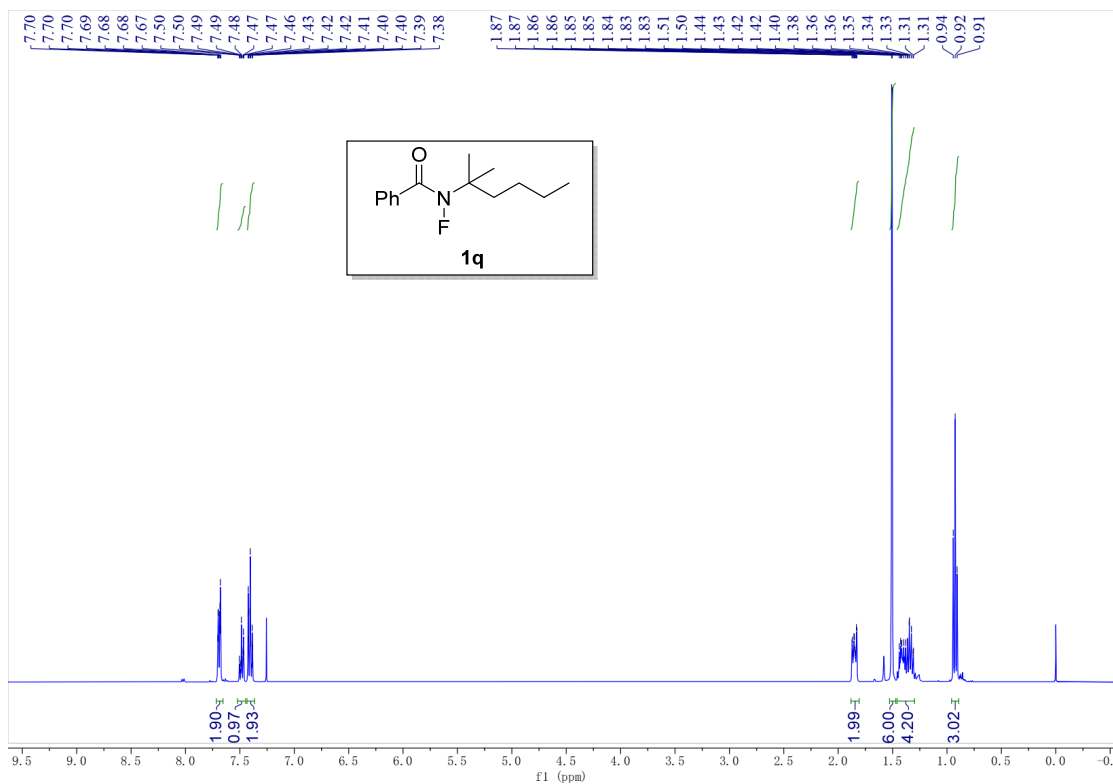

Supplementary Figure 61 <sup>1</sup>H NMR of 1q

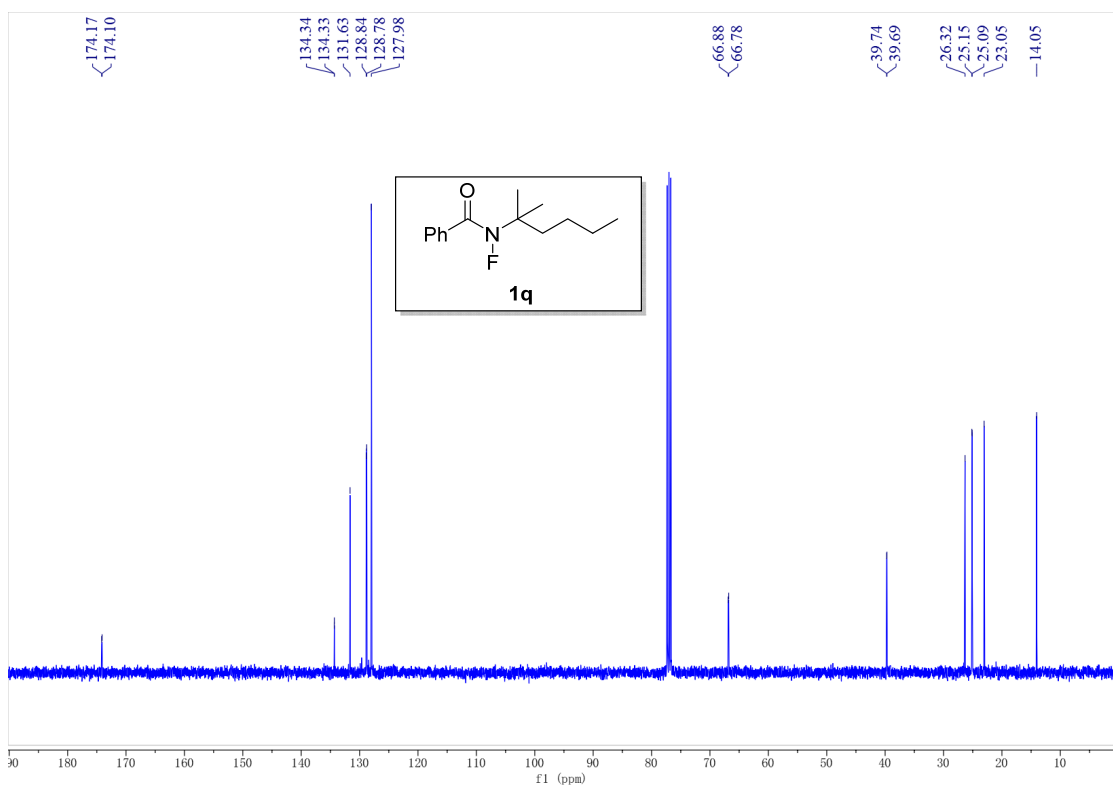

Supplementary Figure 62 <sup>13</sup>C NMR of 1q

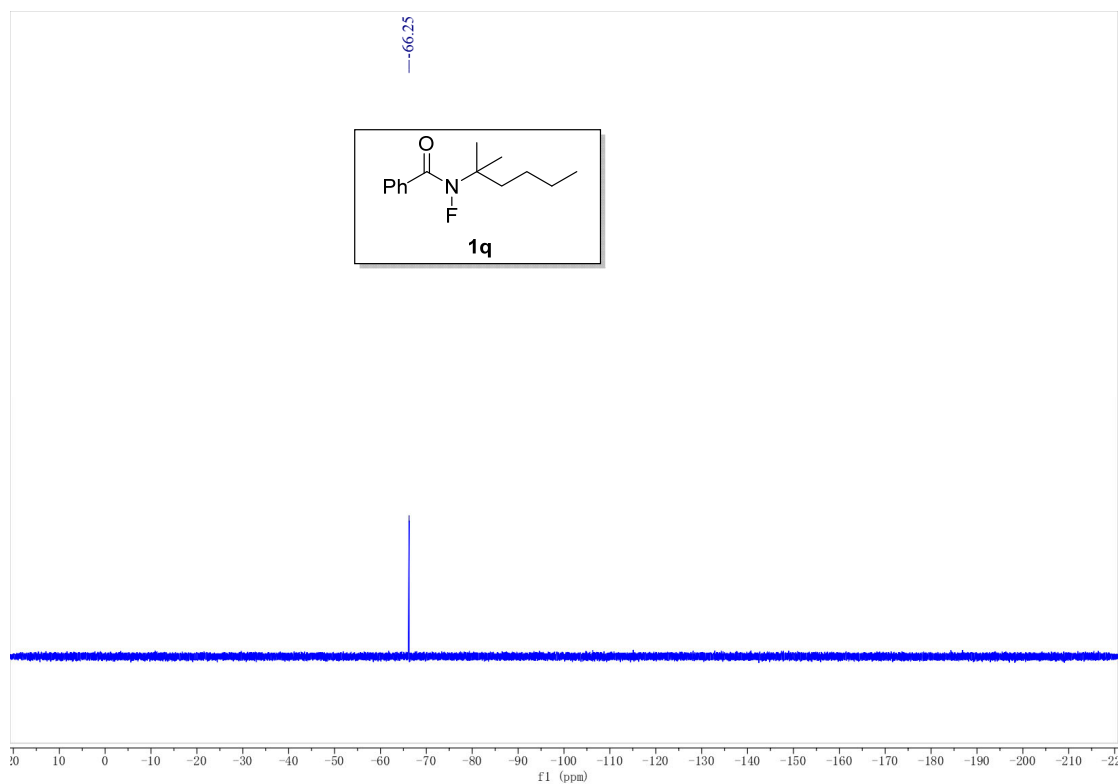

Supplementary Figure 63  $^{19}\text{F}$  NMR of **1q**

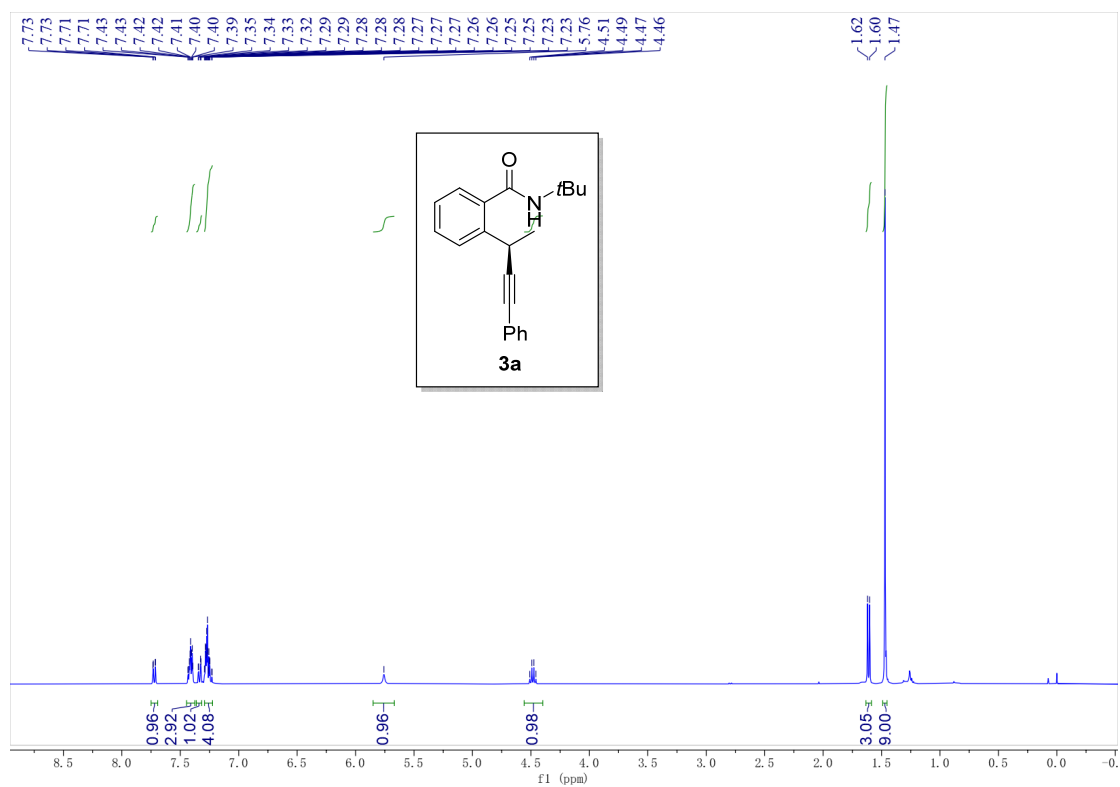

Supplementary Figure 64  $^1\text{H}$  NMR of **3a**

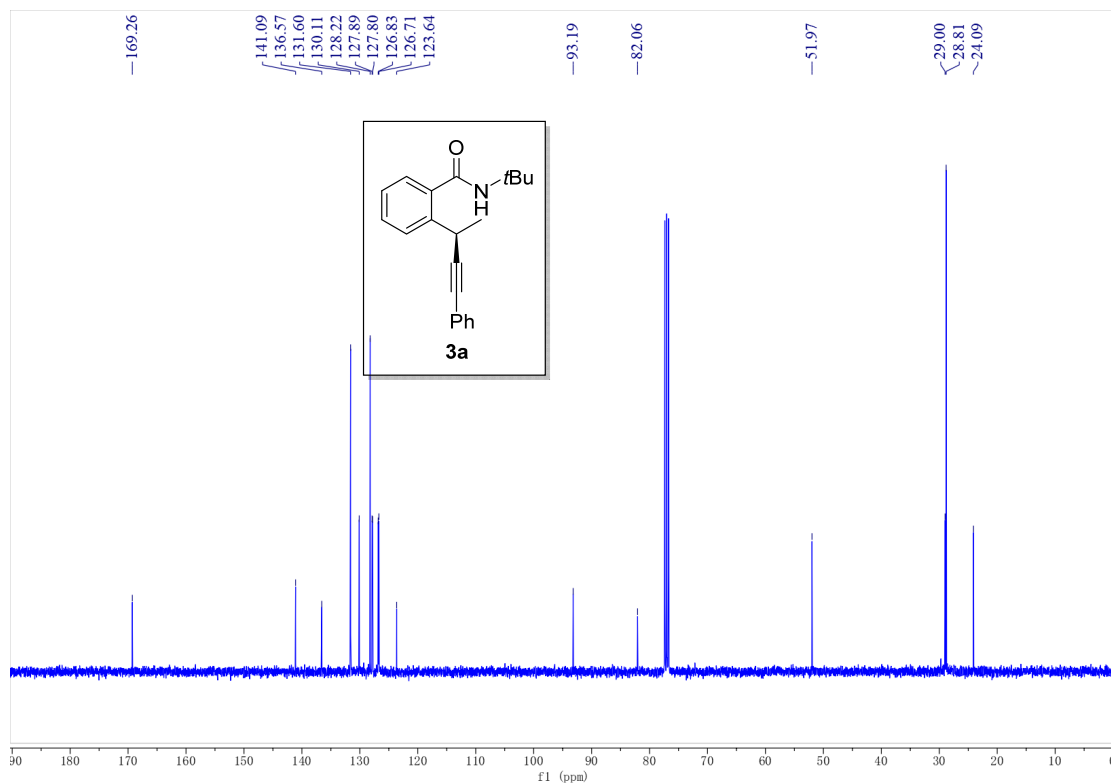

Supplementary Figure 65  $^{13}\text{C}$  NMR of **3a**

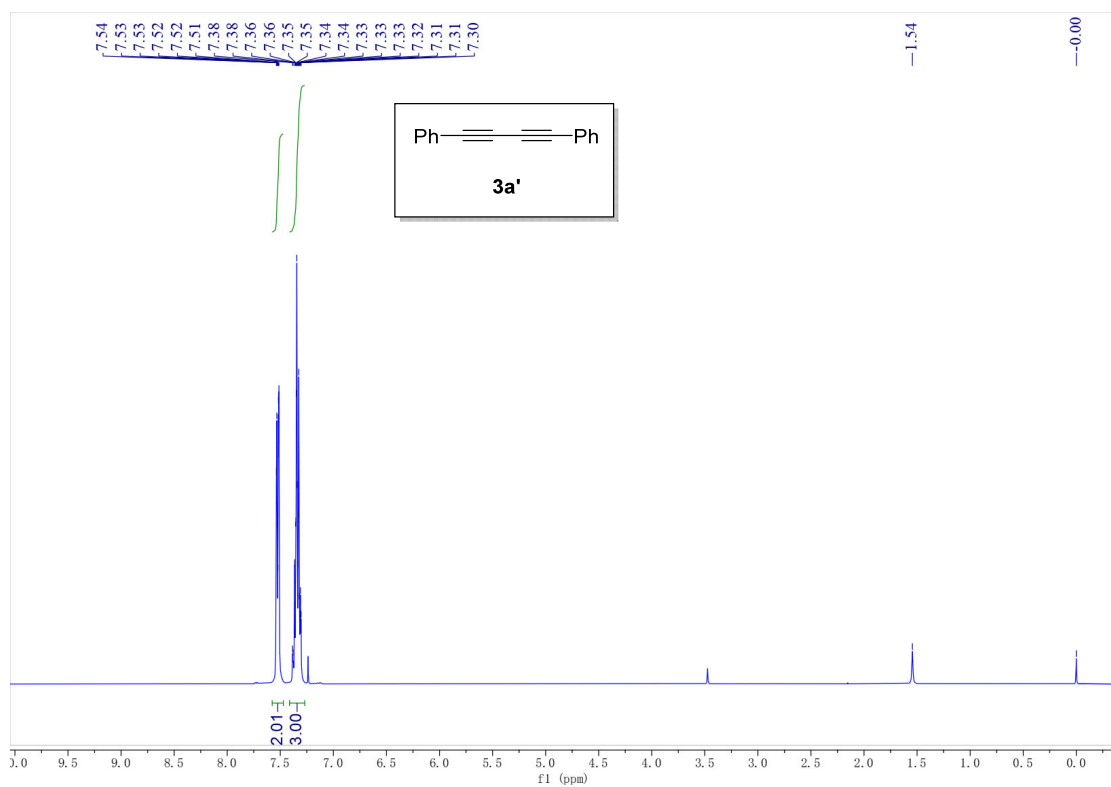

Supplementary Figure 66  $^1\text{H}$  NMR of **3a'**

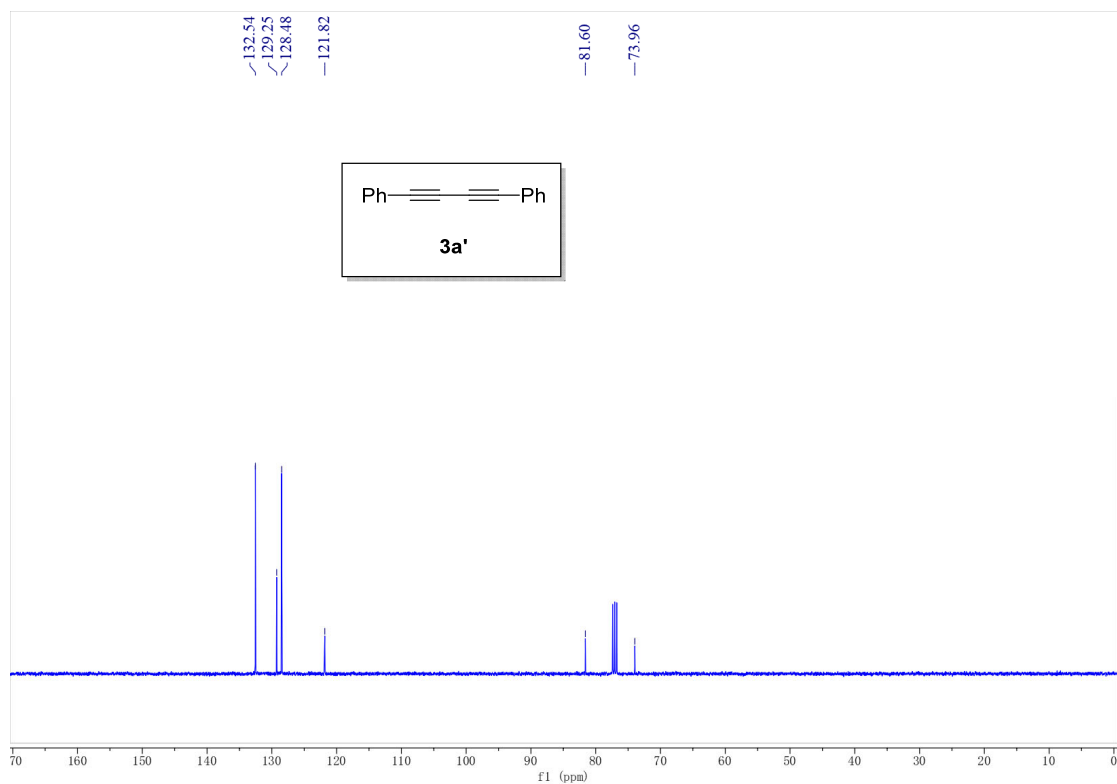

Supplementary Figure 67 <sup>13</sup>C NMR of **3a'**

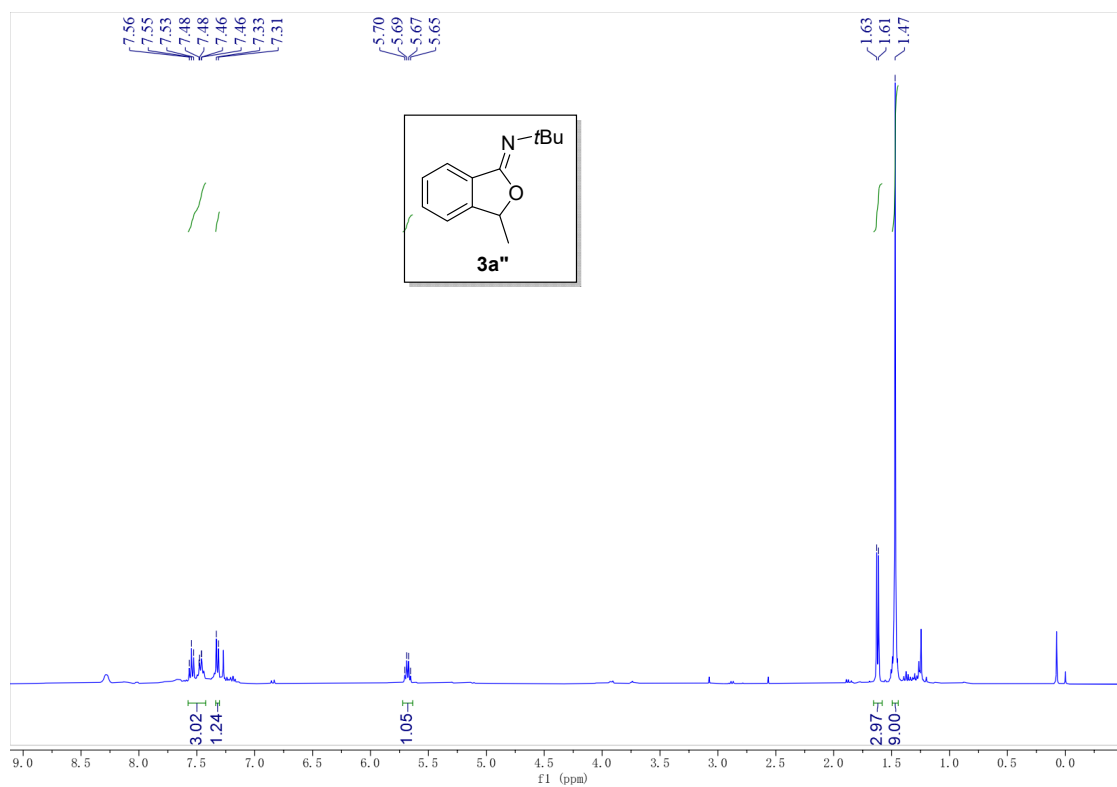

Supplementary Figure 68 <sup>1</sup>H NMR of **3a''**

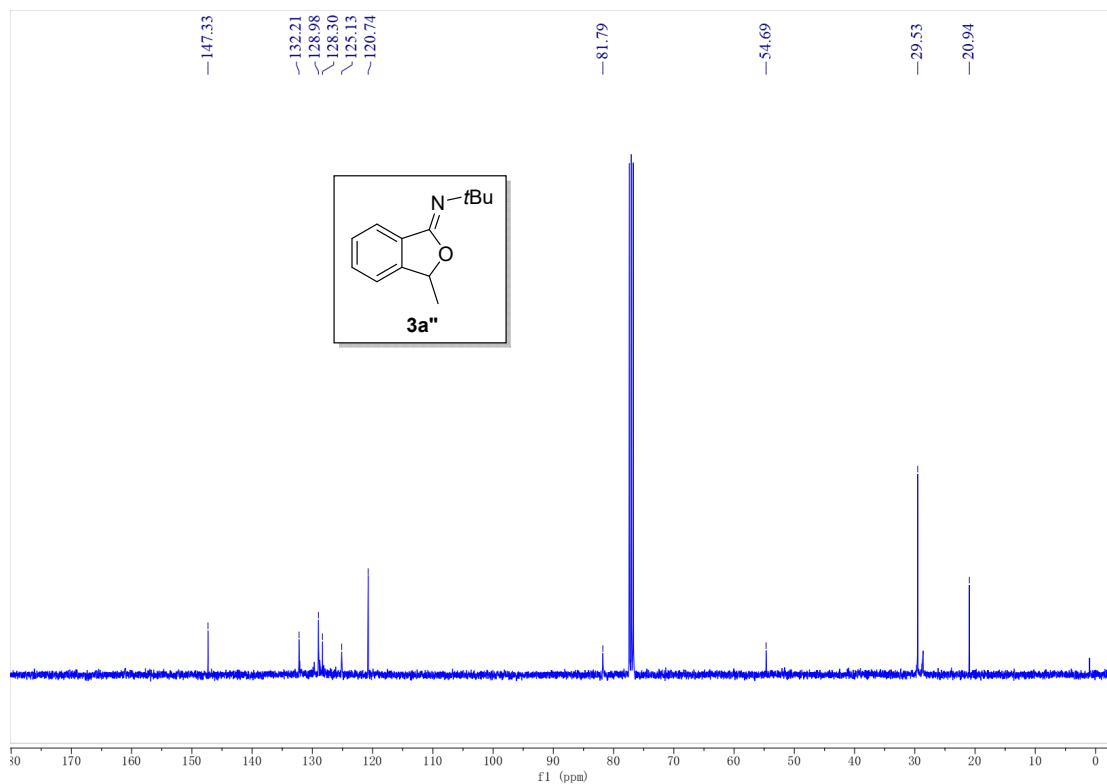

Supplementary Figure 69 <sup>13</sup>C NMR of 3a''

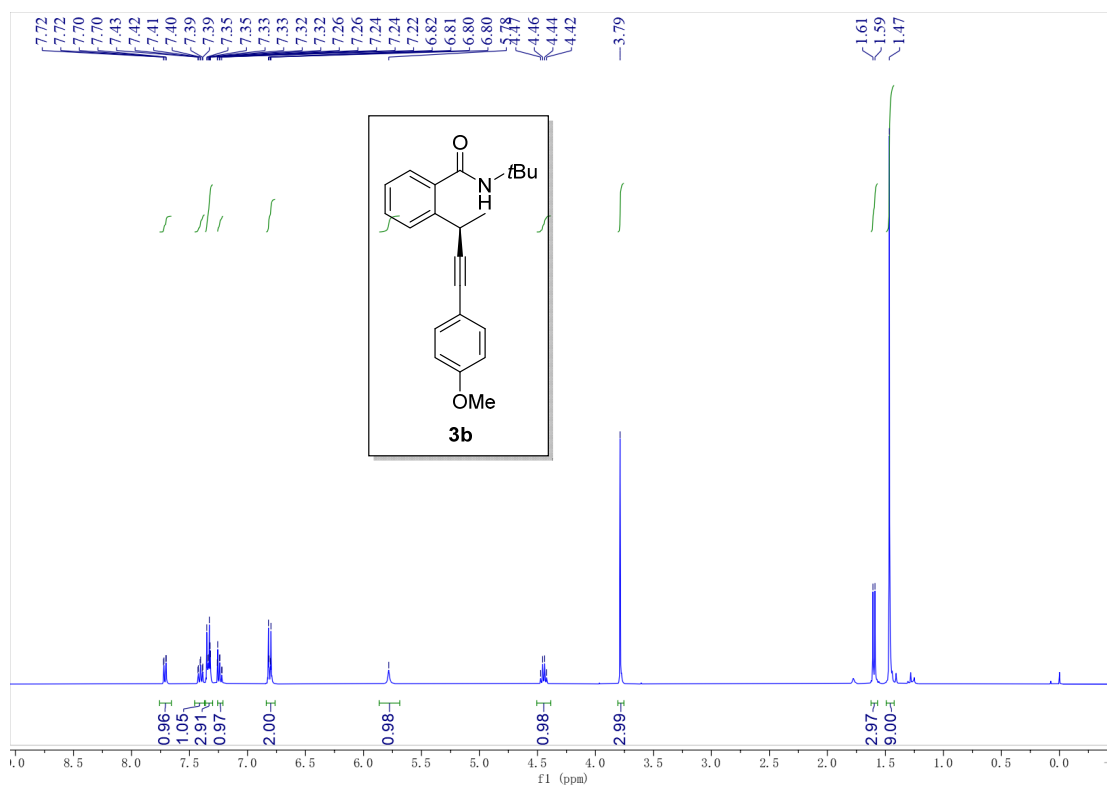

Supplementary Figure 70 <sup>1</sup>H NMR of 3b

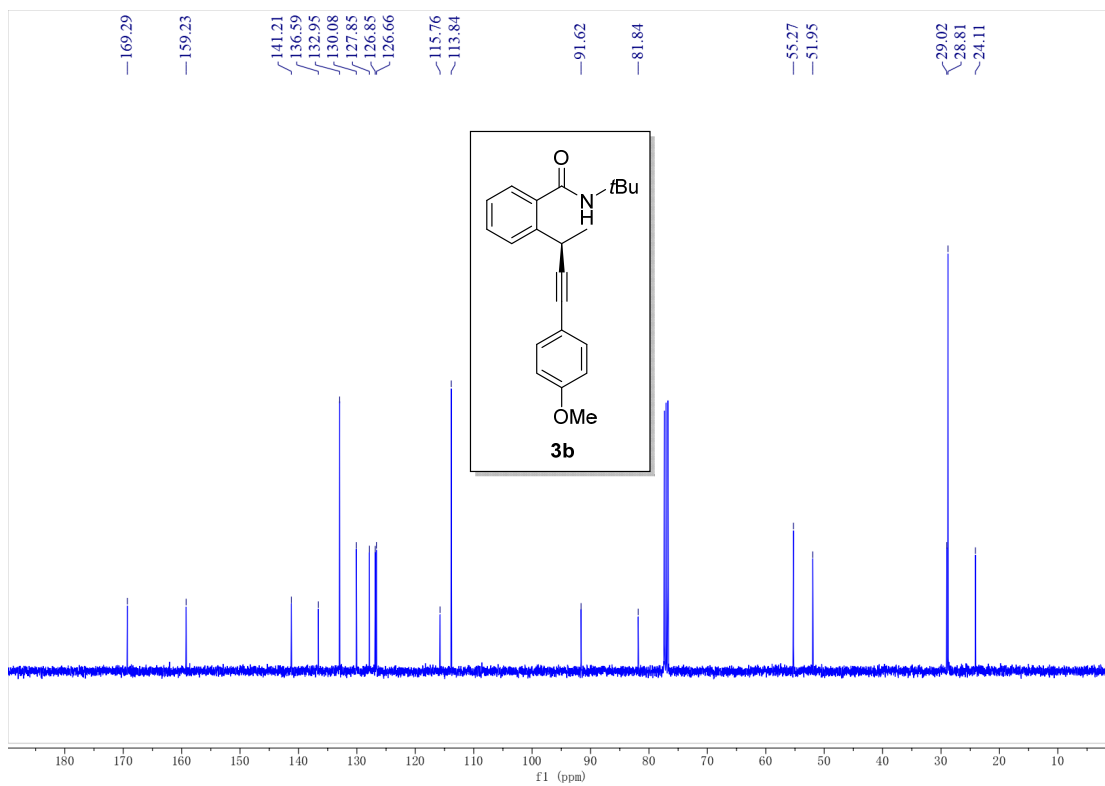

Supplementary Figure 71 <sup>13</sup>C NMR of **3b**

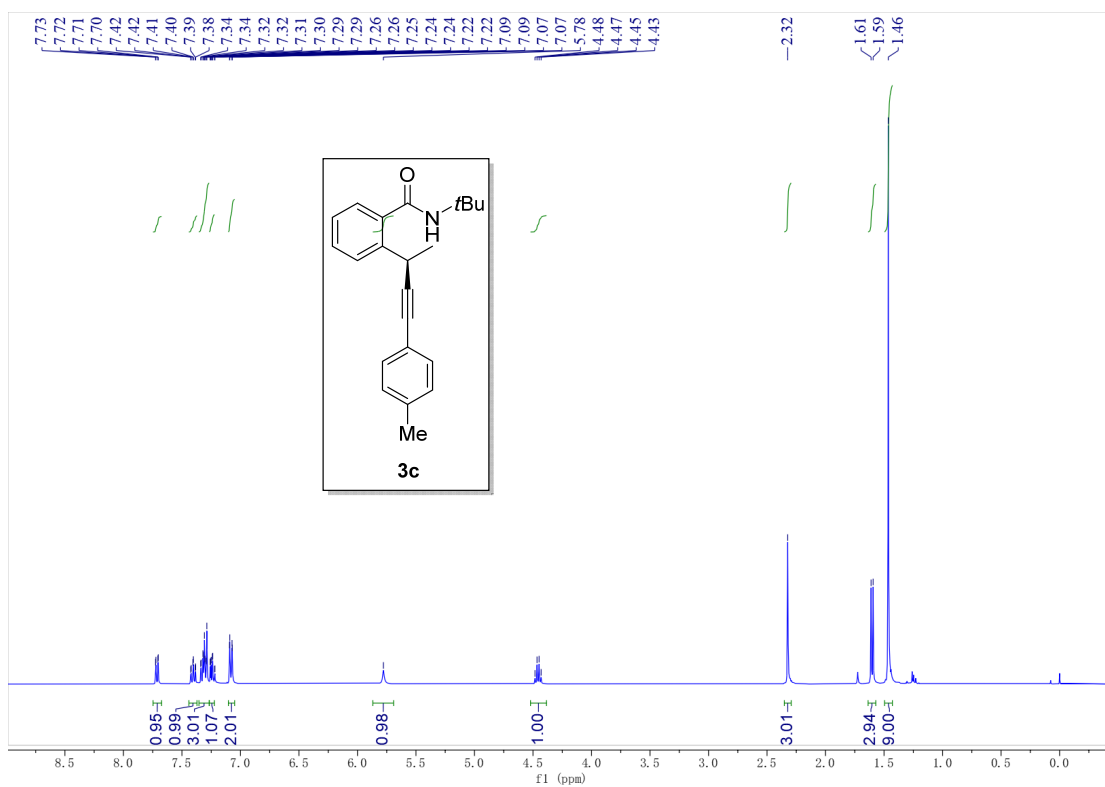

Supplementary Figure 72 <sup>1</sup>H NMR of **3c**

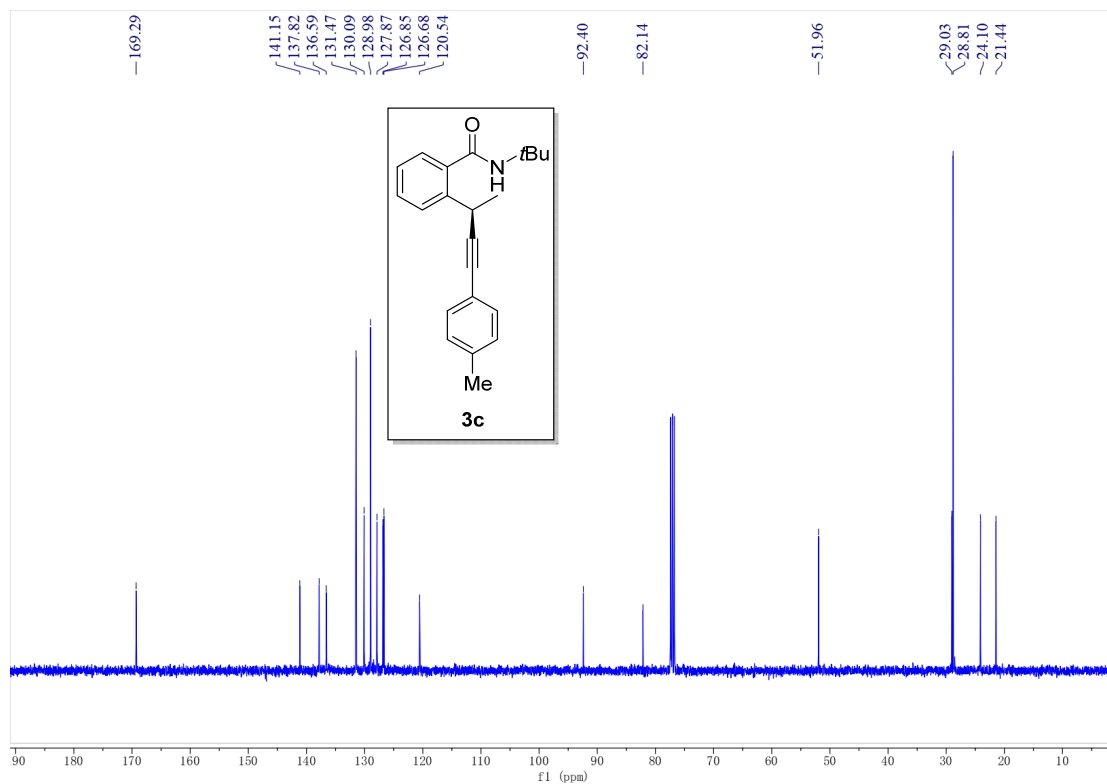

Supplementary Figure 73 <sup>13</sup>C NMR of **3c**

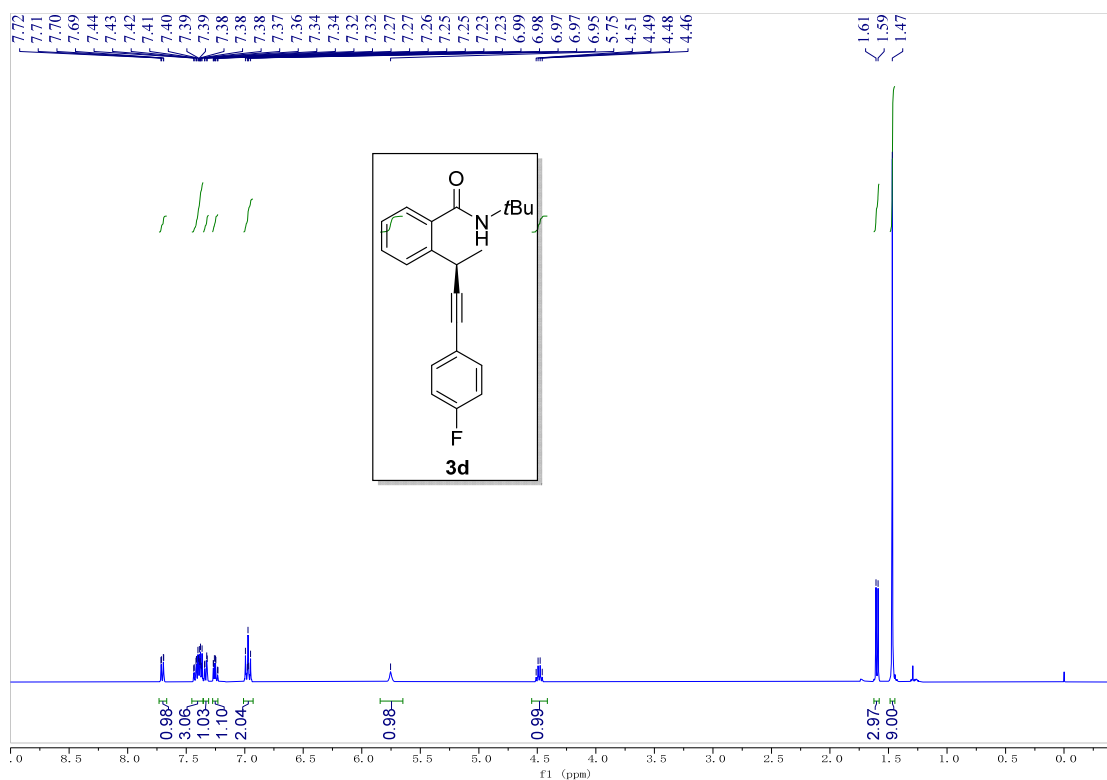

Supplementary Figure 74 <sup>1</sup>H NMR of **3d**



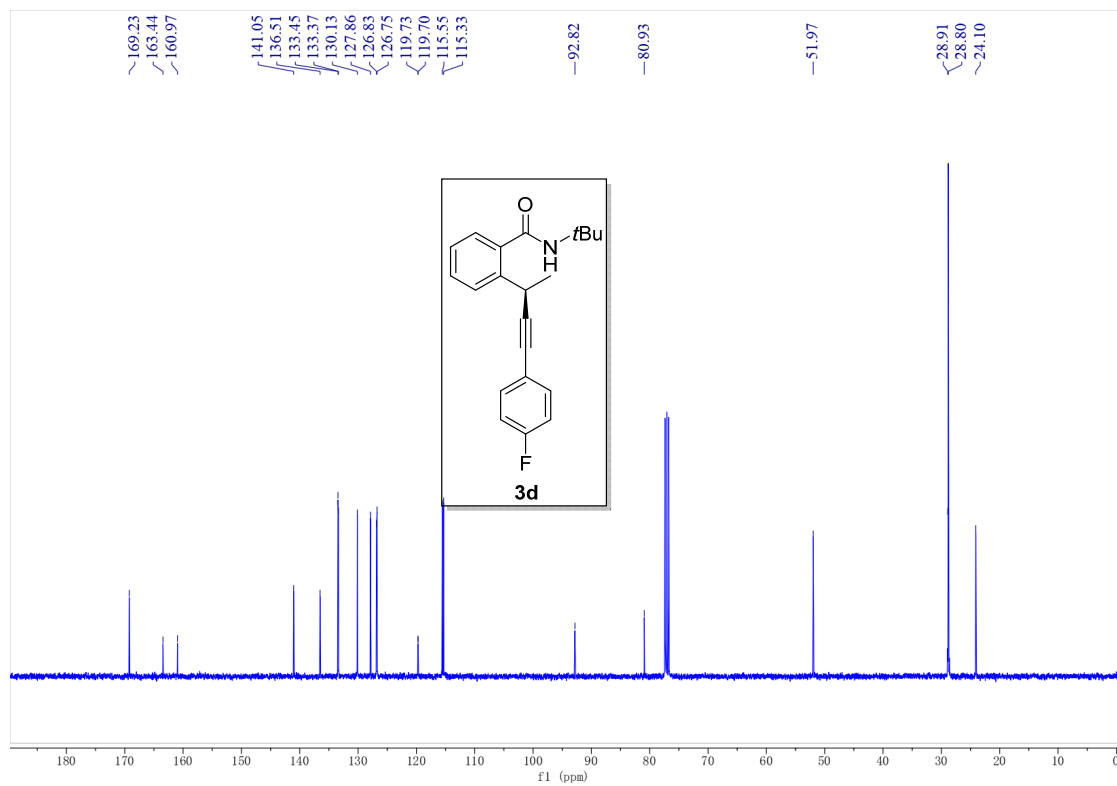

Supplementary Figure 75  $^{13}\text{C}$  NMR of **3d**

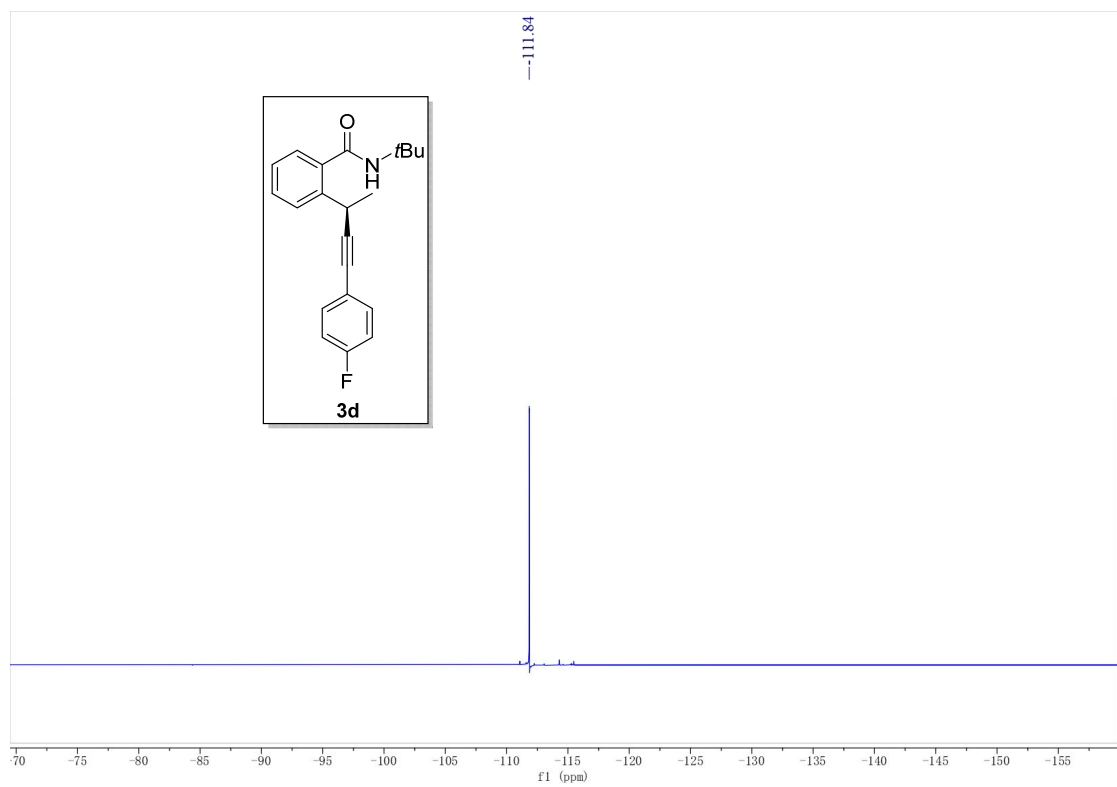

Supplementary Figure 76  $^{19}\text{F}$  NMR of **3d**

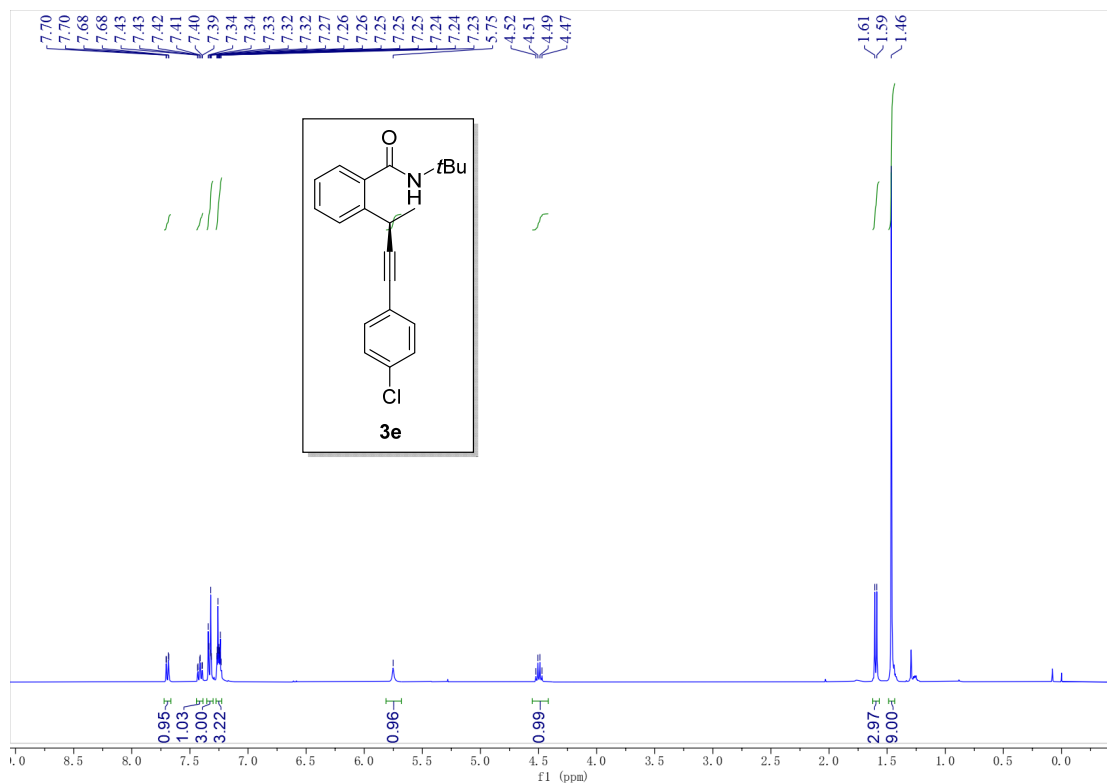

Supplementary Figure 77 <sup>1</sup>H NMR of **3e**

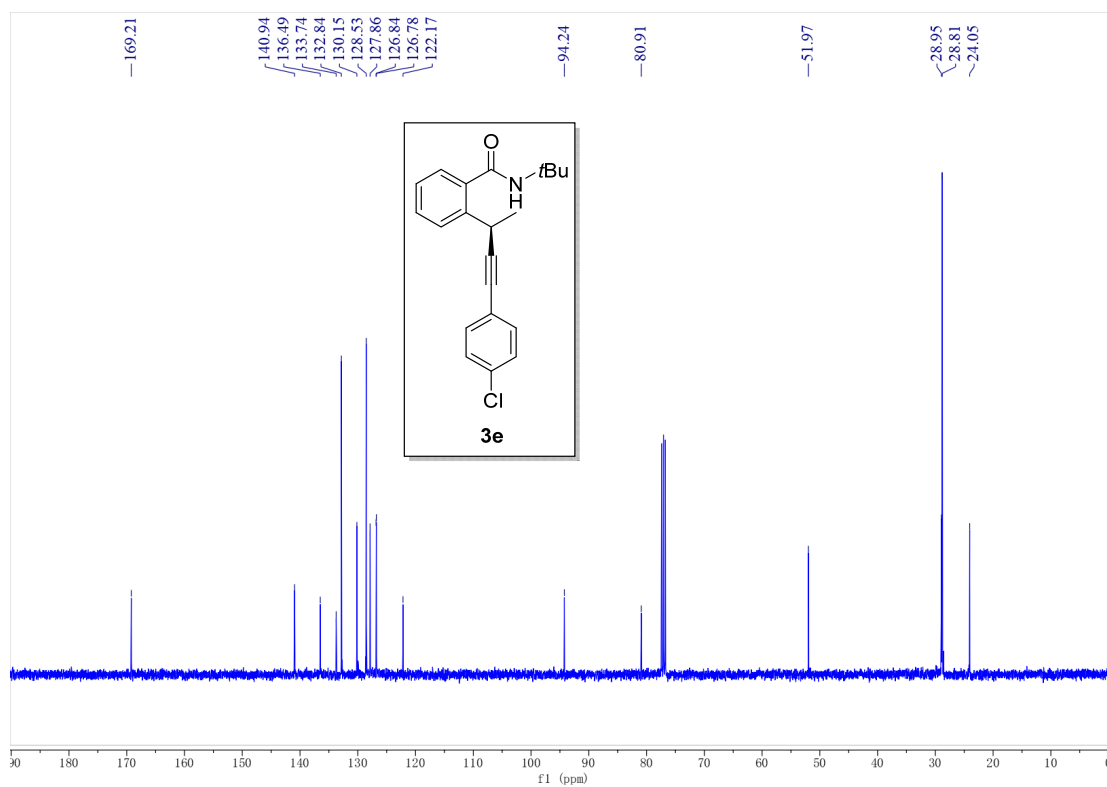

Supplementary Figure 78 <sup>13</sup>C NMR of **3e**

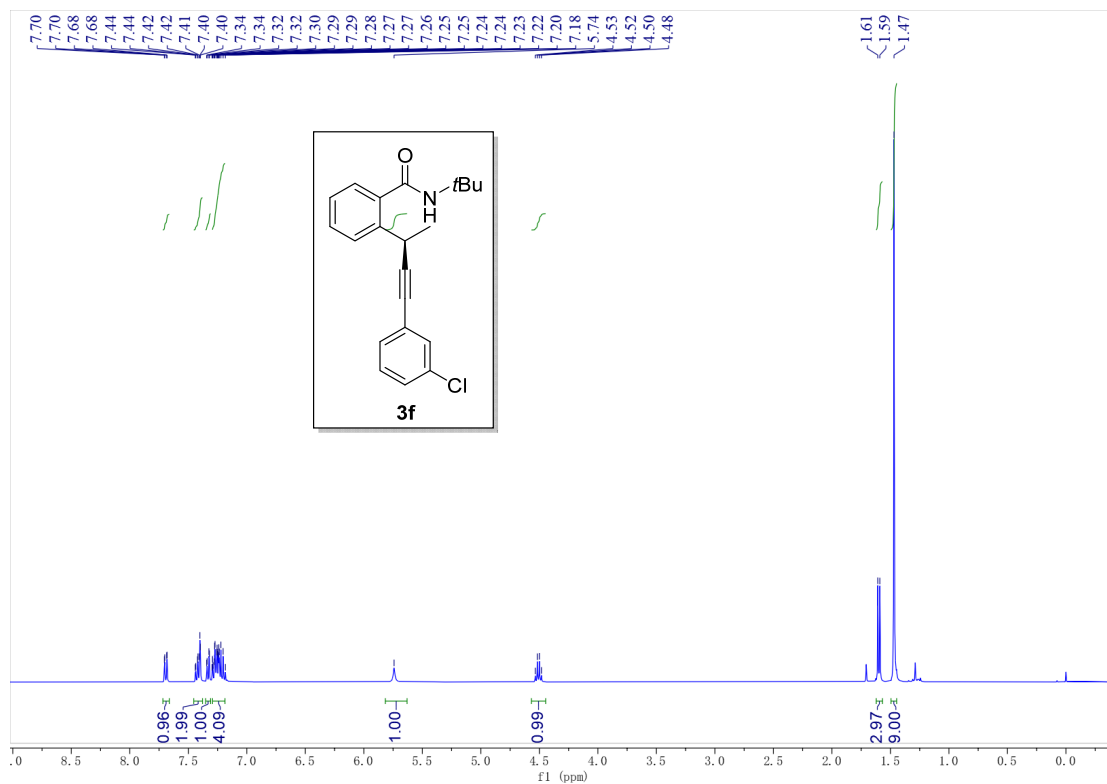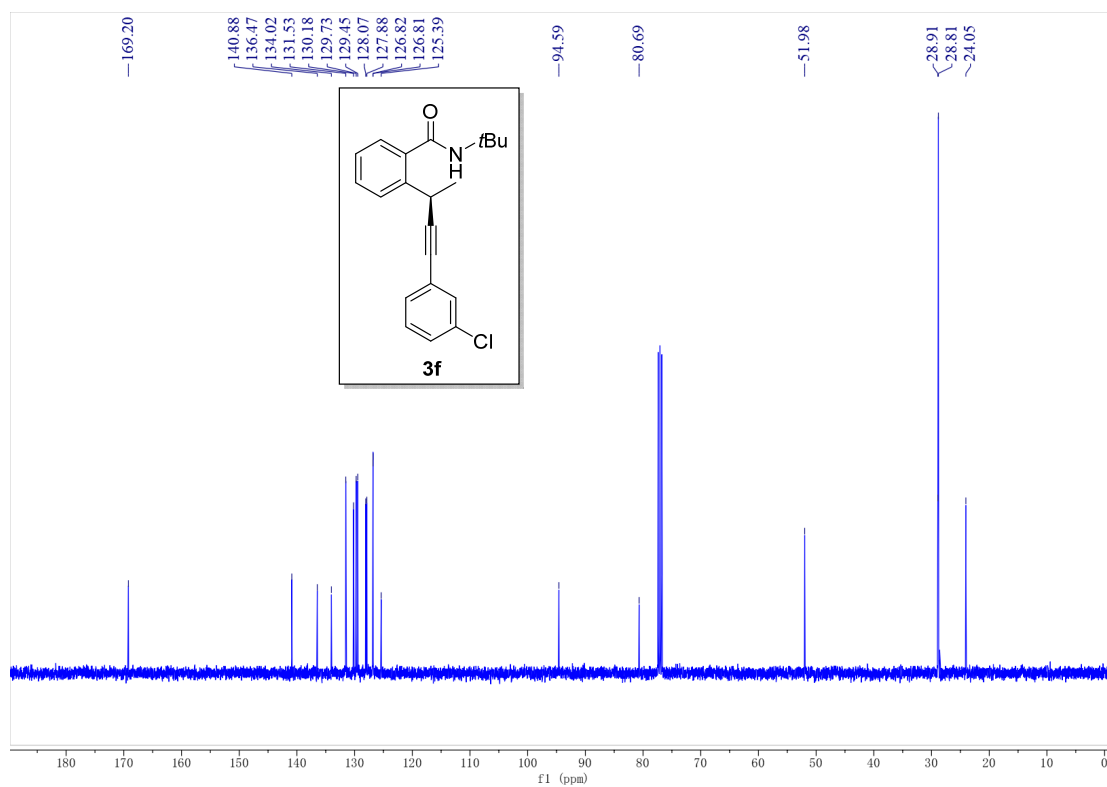

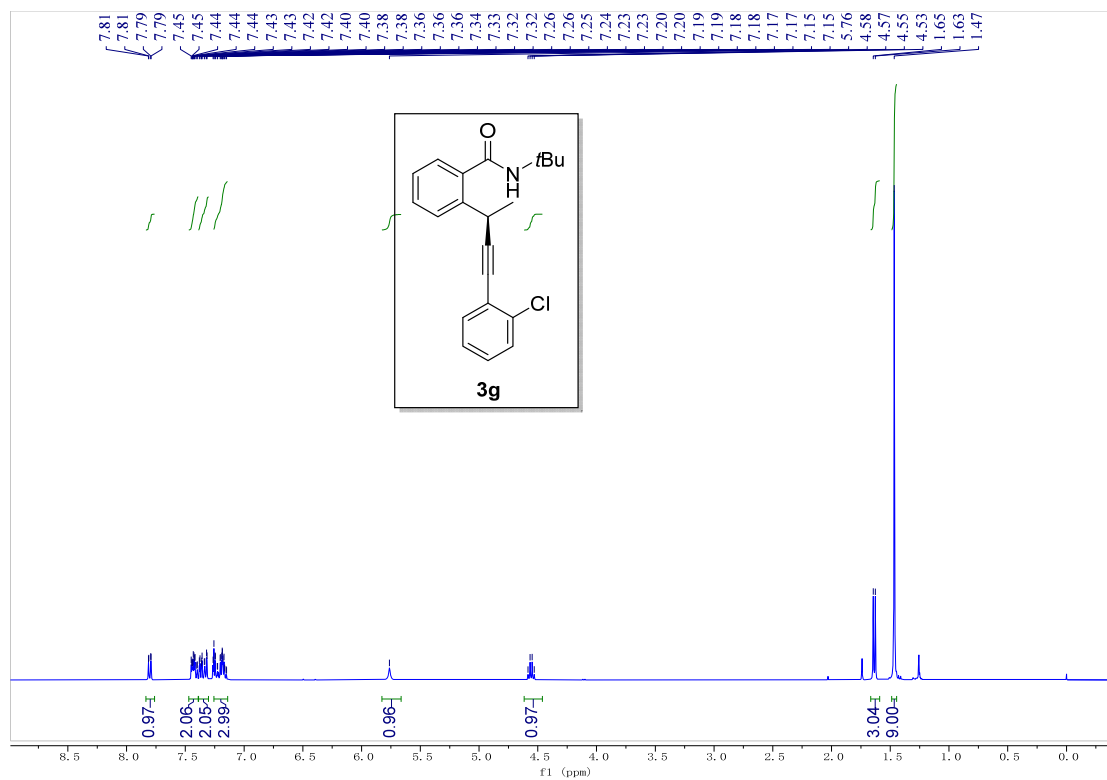

Supplementary Figure 81  $^1\text{H}$  NMR of **3g**

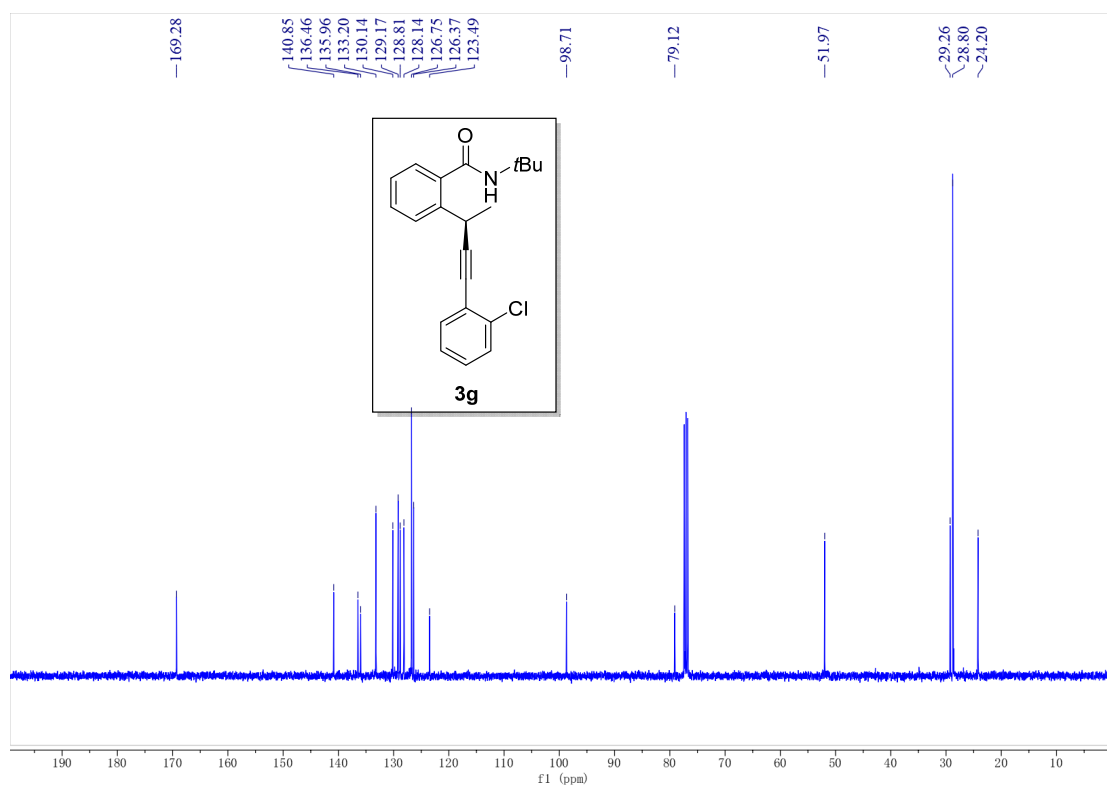

Supplementary Figure 82  $^{13}\text{C}$  NMR of **3g**



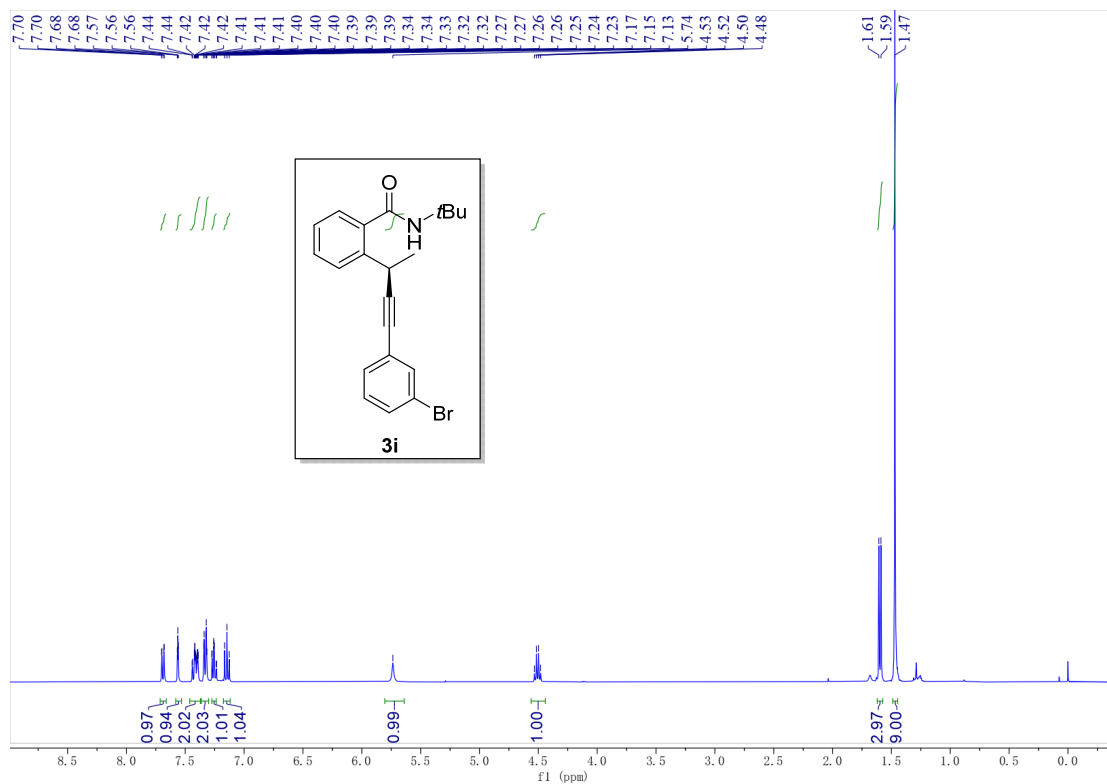

Supplementary Figure 85 <sup>1</sup>H NMR of **3i**

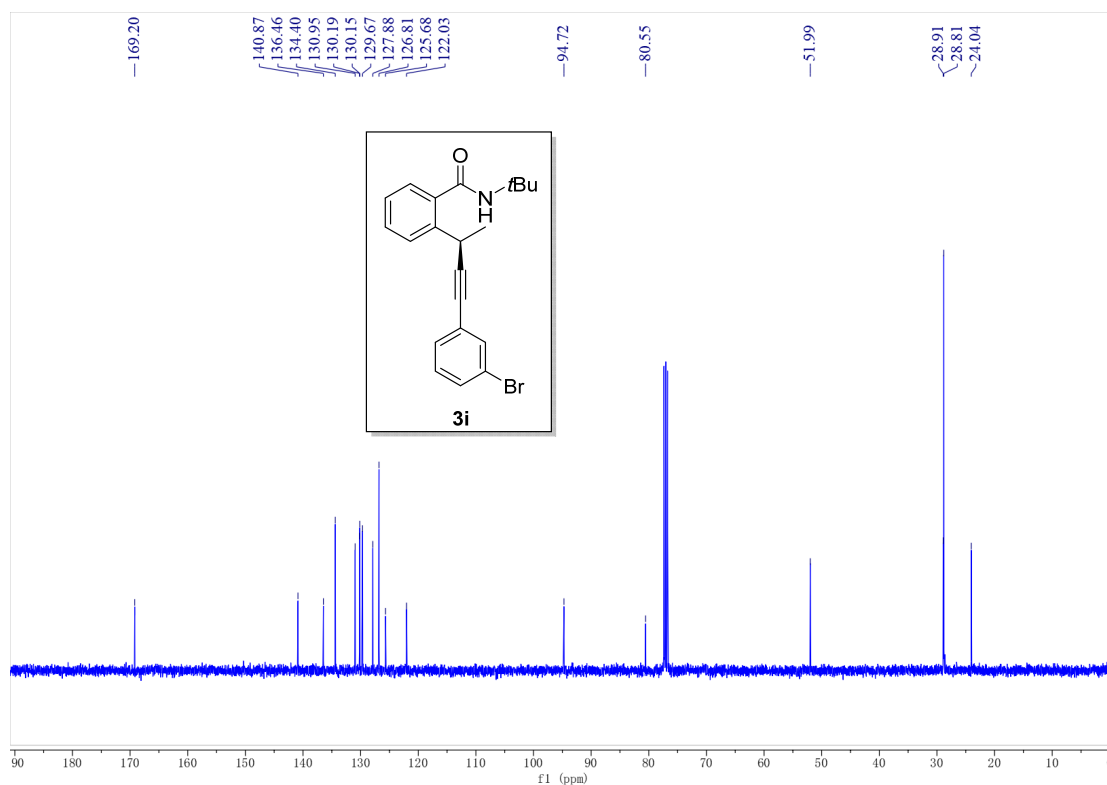

Supplementary Figure 86 <sup>13</sup>C NMR of **3i**

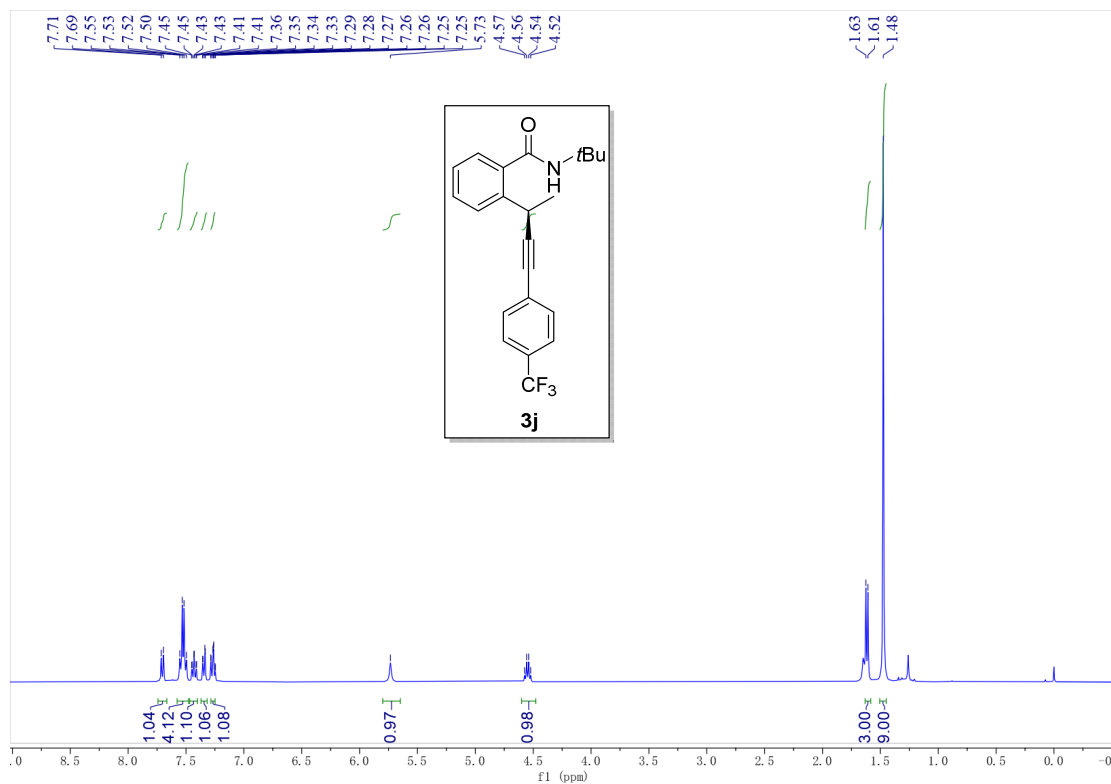

Supplementary Figure 87 <sup>1</sup>H NMR of **3j**

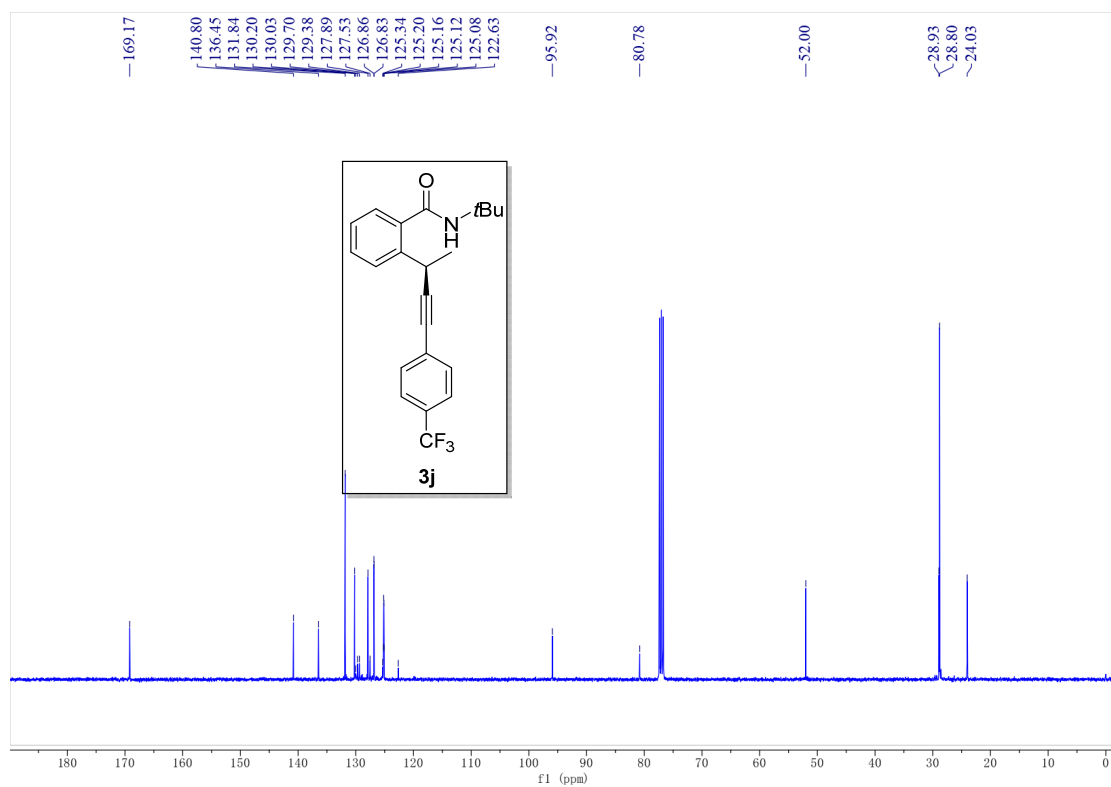

Supplementary Figure 88 <sup>13</sup>C NMR of **3j**

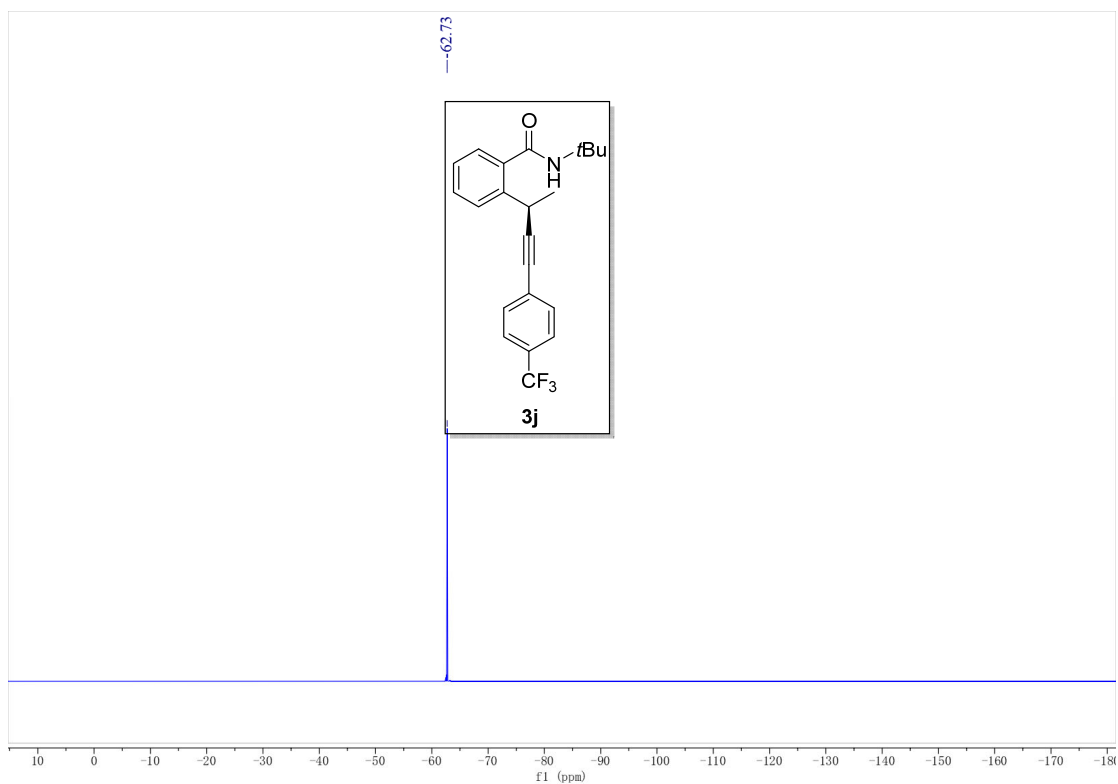

Supplementary Figure 89  $^{19}\text{F}$  NMR of **3j**

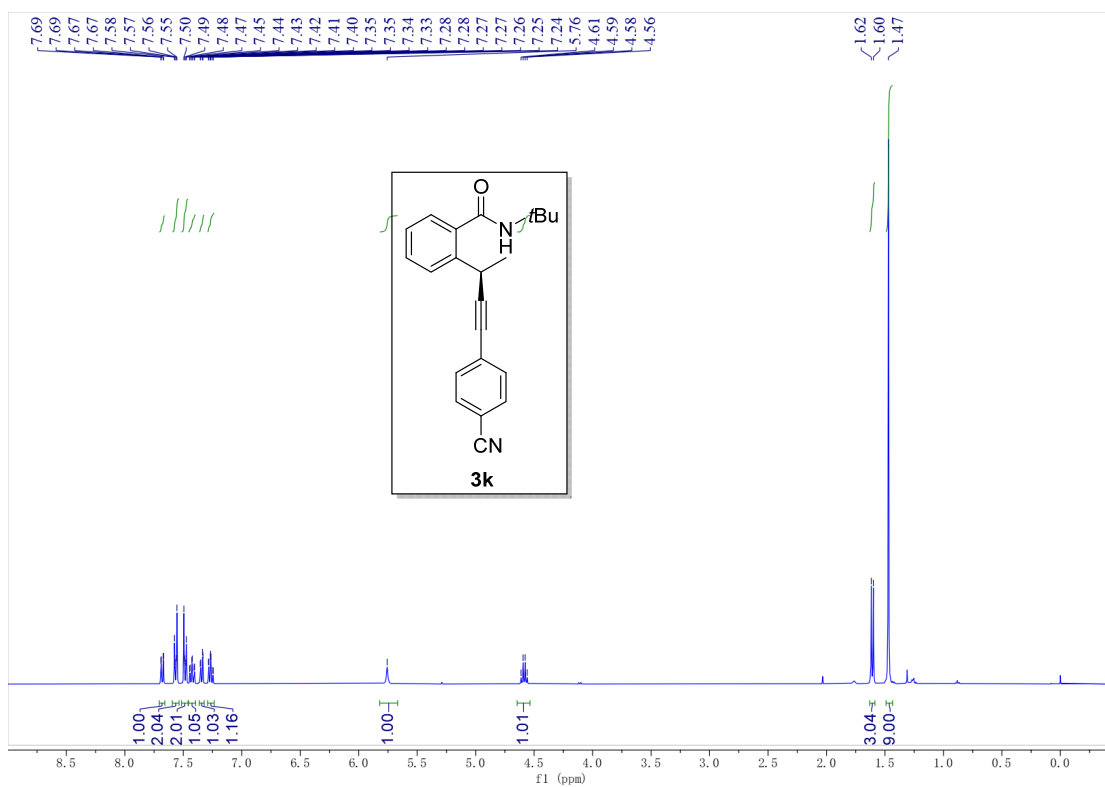

Supplementary Figure 90  $^1\text{H}$  NMR of **3k**



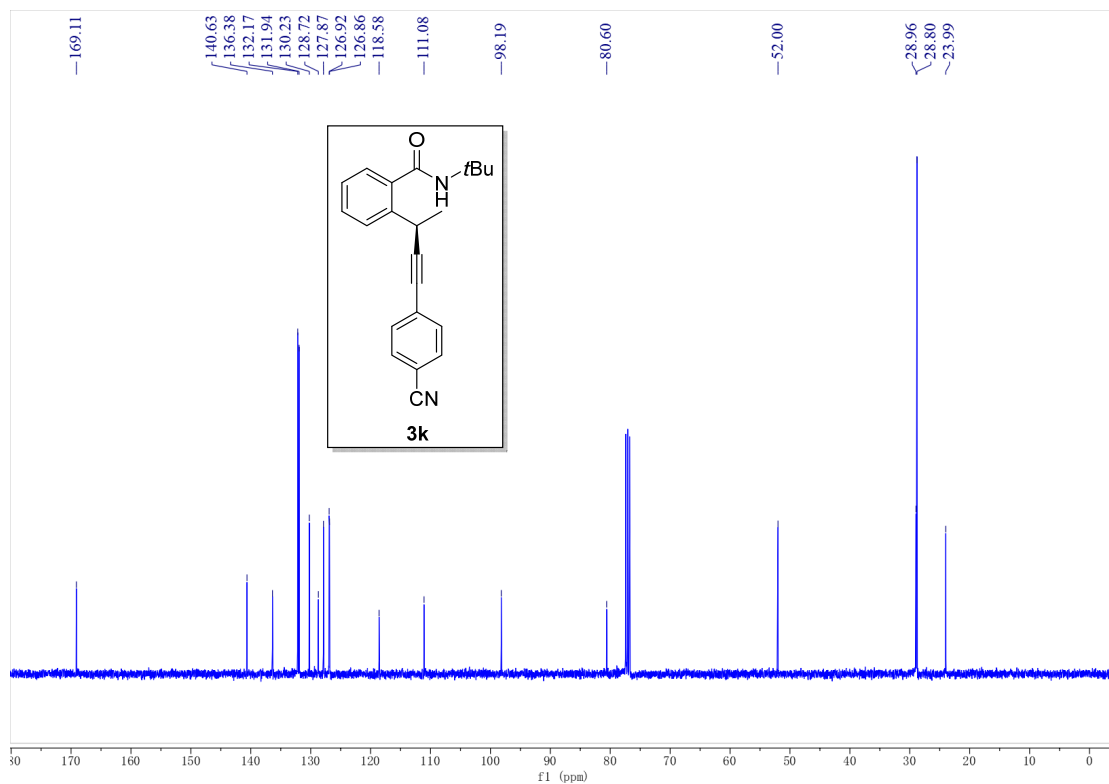

Supplementary Figure 91 <sup>13</sup>C NMR of **3k**

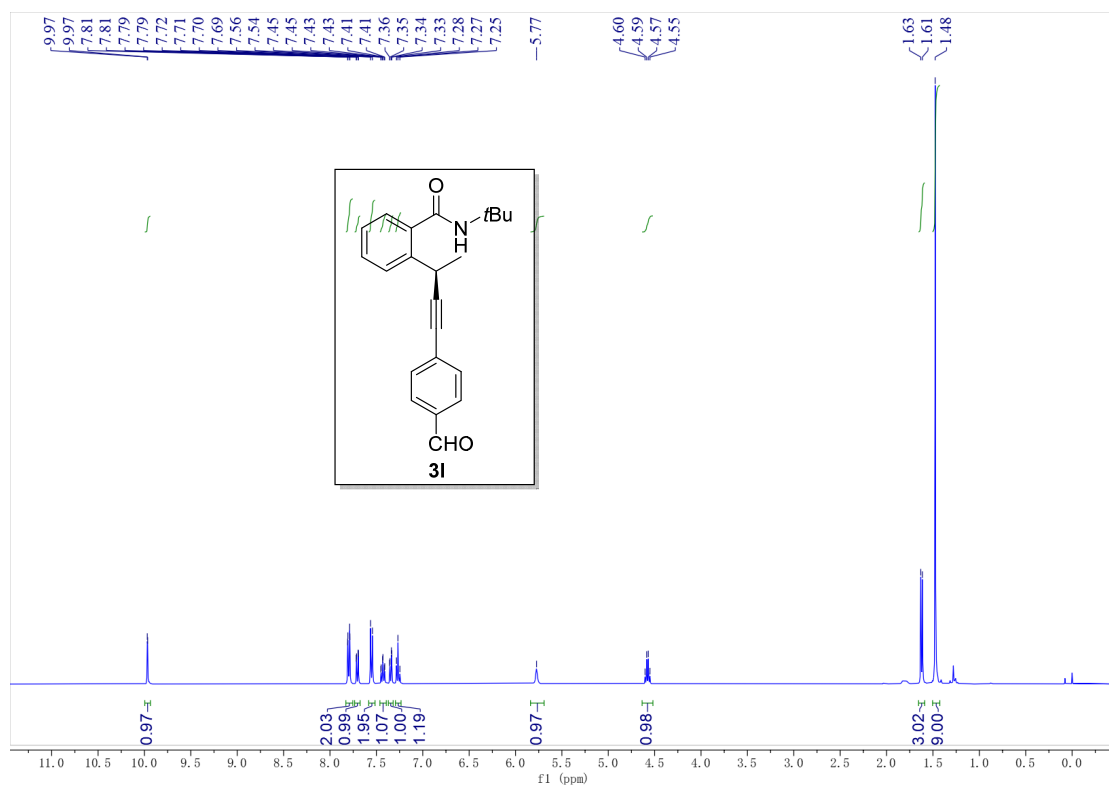

Supplementary Figure 92 <sup>1</sup>H NMR of **3l**

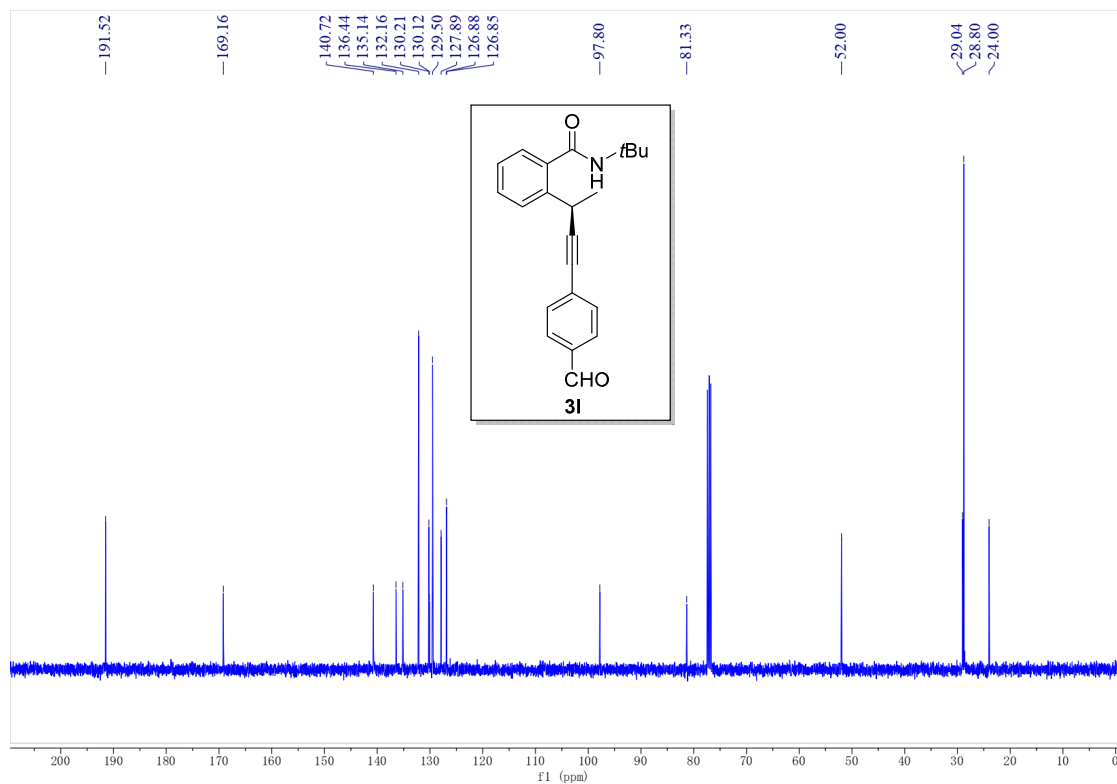

Supplementary Figure 93 <sup>13</sup>C NMR of **3l**

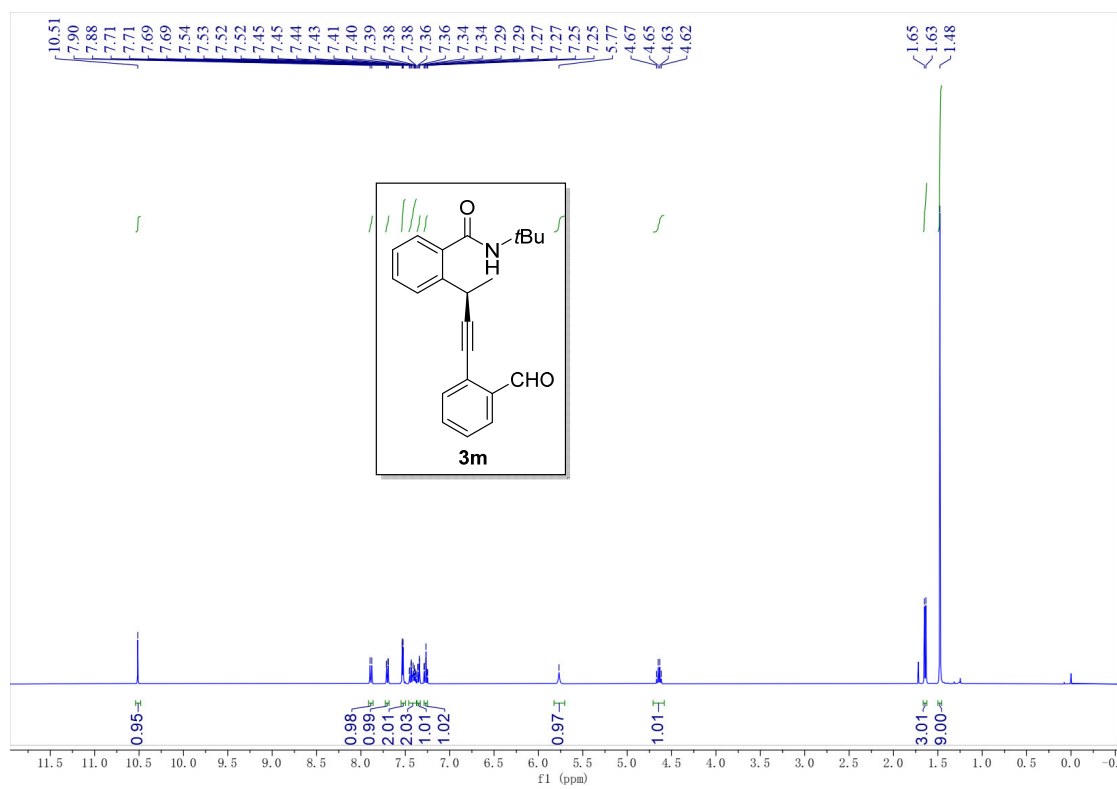

Supplementary Figure 94 <sup>1</sup>H NMR of **3m**

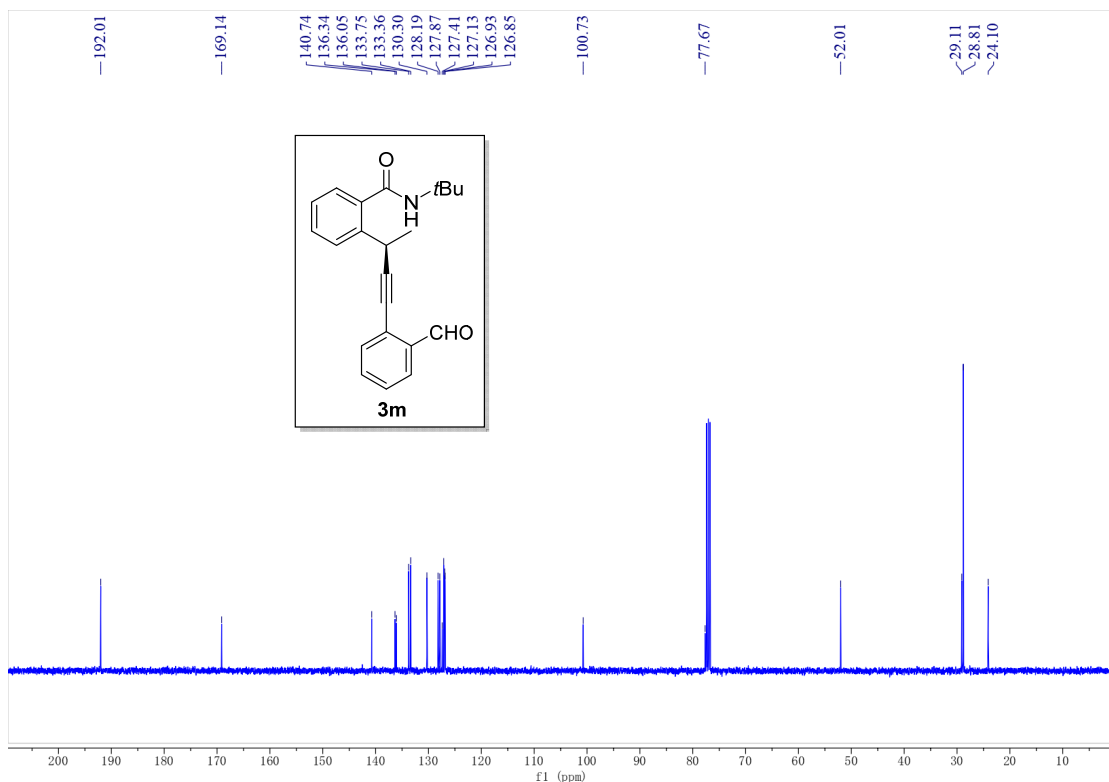

Supplementary Figure 95 <sup>13</sup>C NMR of **3m**

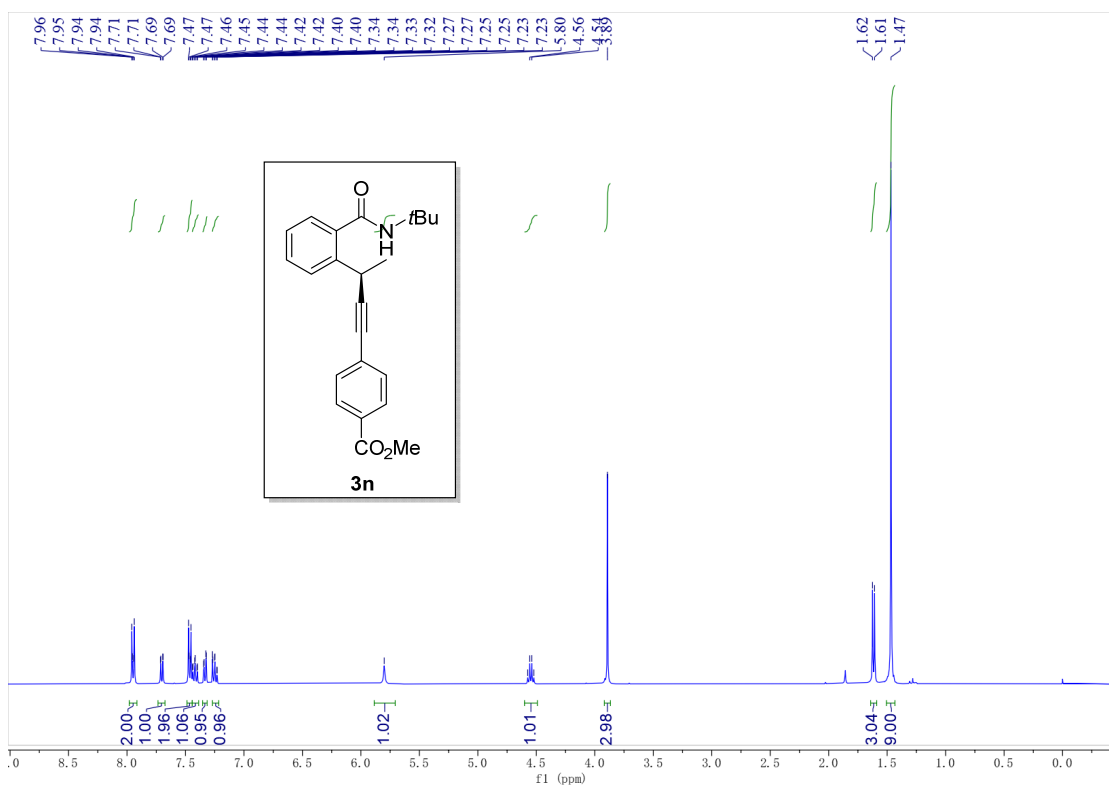

Supplementary Figure 96 <sup>1</sup>H NMR of **3n**

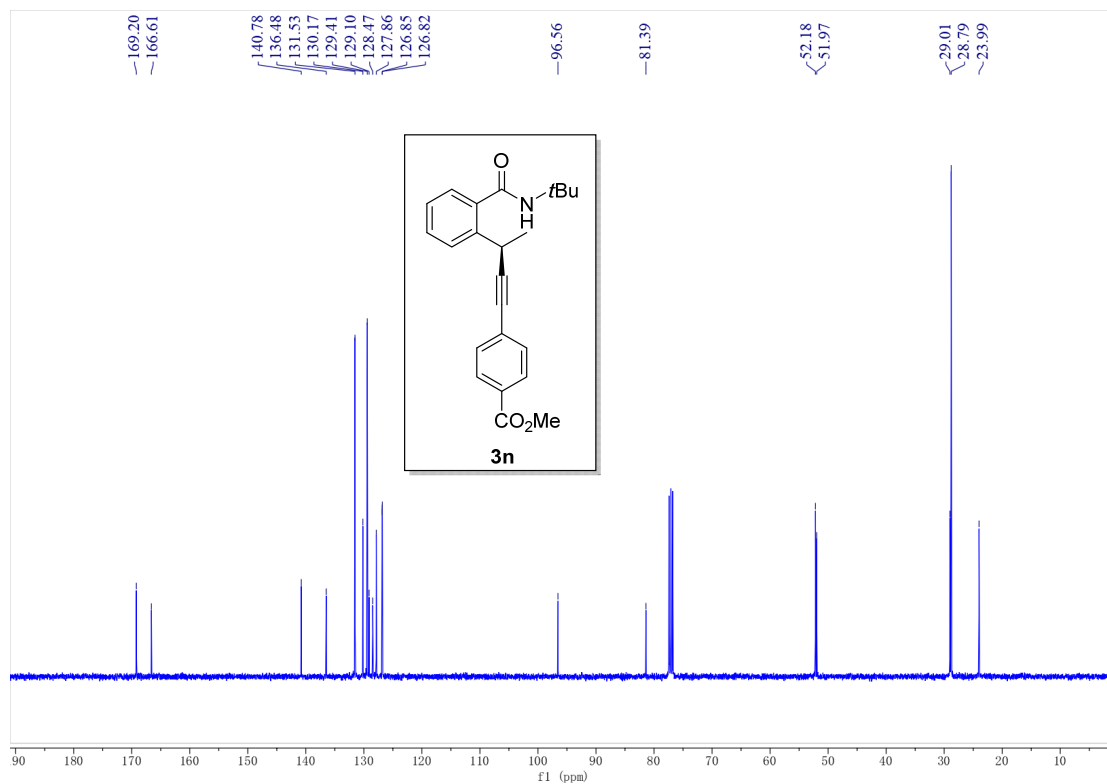

Supplementary Figure 97  $^{13}\text{C}$  NMR of **3n**

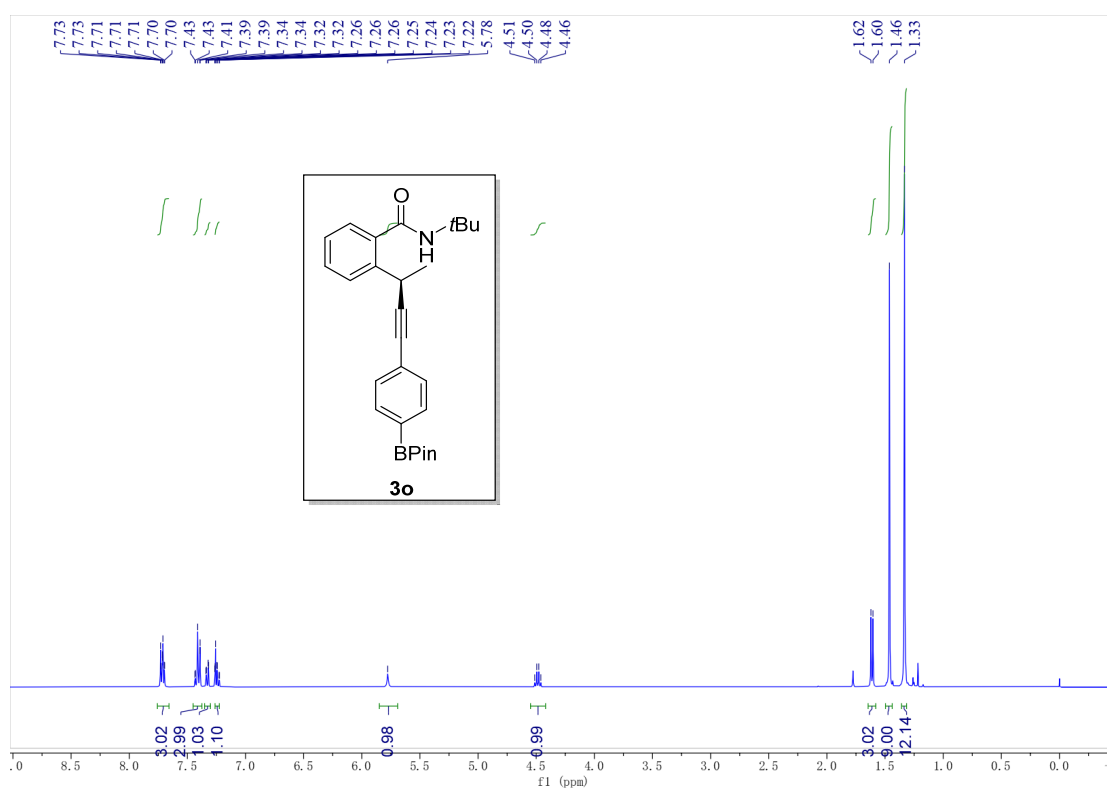

Supplementary Figure 98  $^1\text{H}$  NMR of **3o**

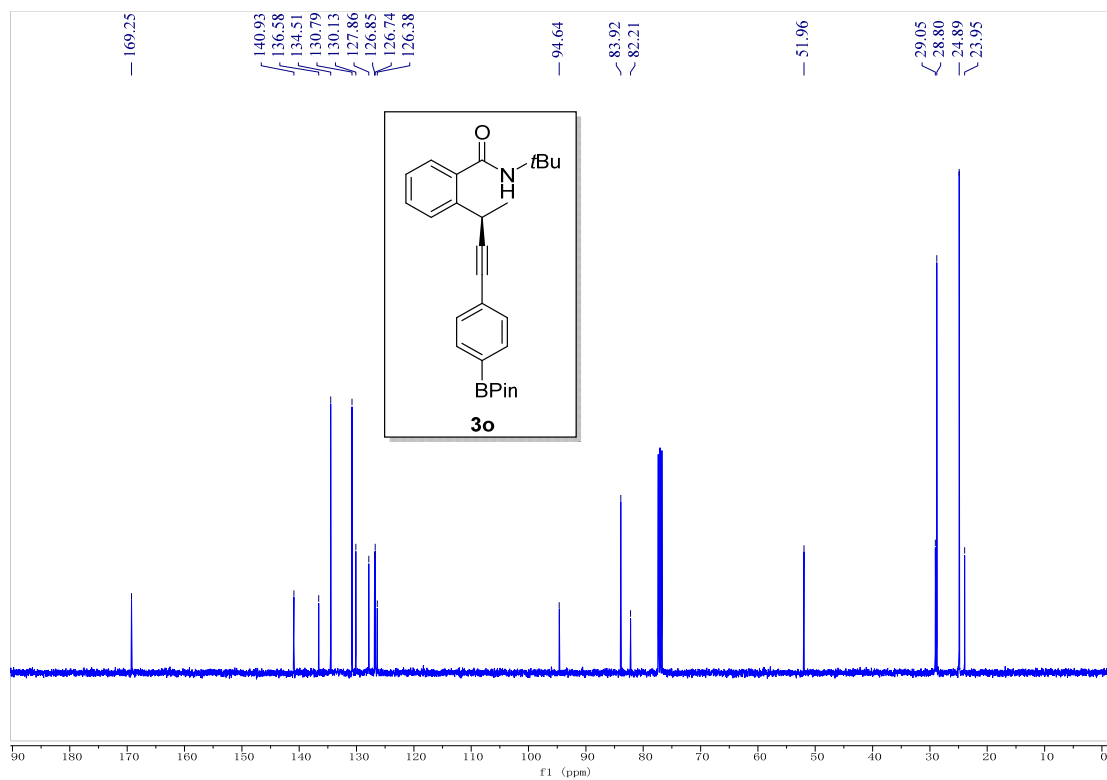

Supplementary Figure 99 <sup>13</sup>C NMR of **3o**

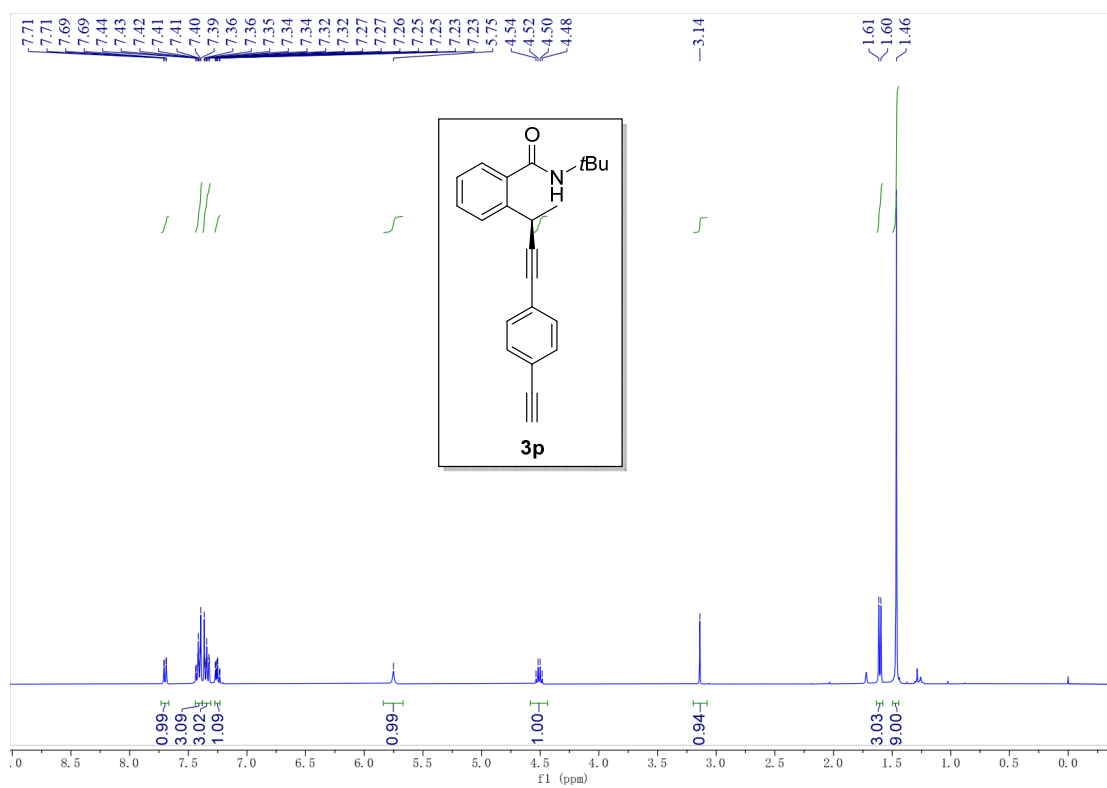

Supplementary Figure 100 <sup>1</sup>H NMR of **3p**

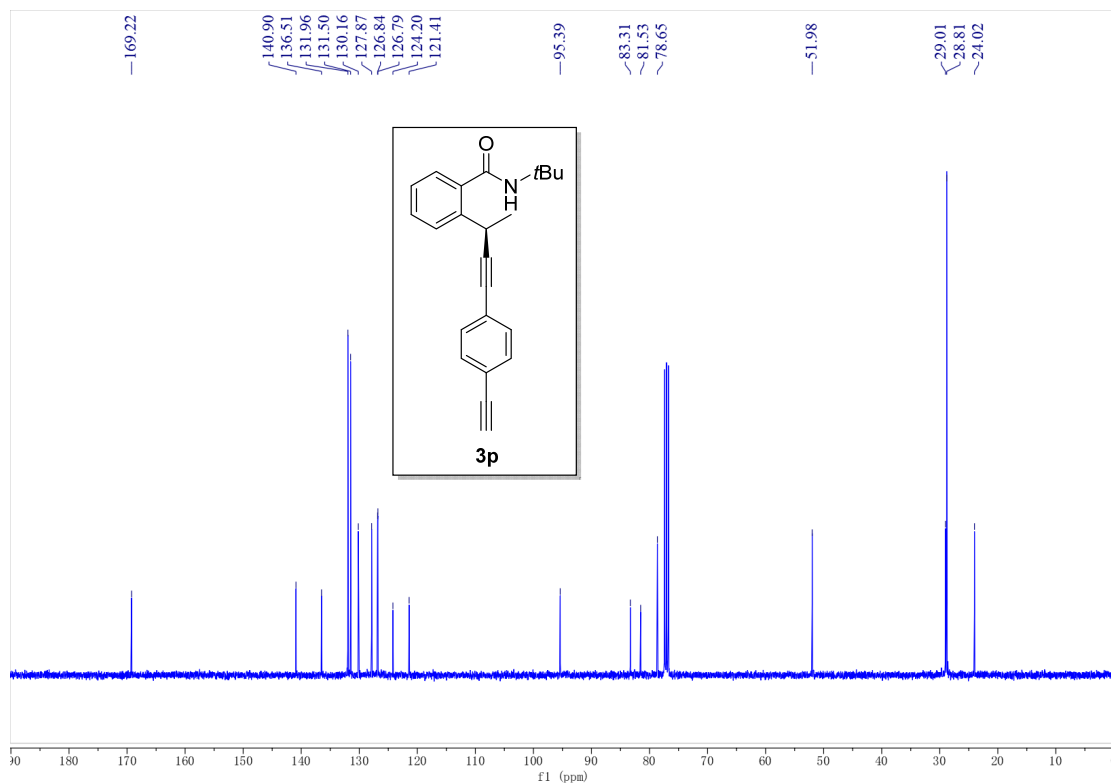

Supplementary Figure 101  $^{13}\text{C}$  NMR of **3p**

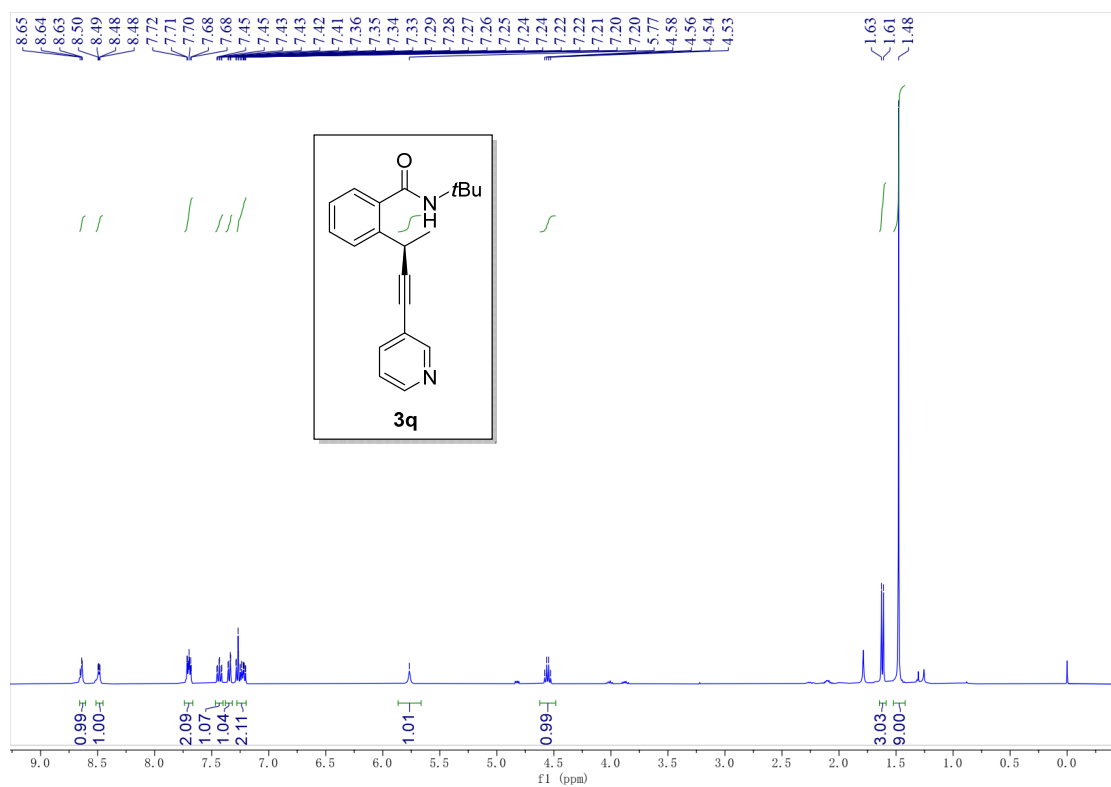

Supplementary Figure 102  $^1\text{H}$  NMR of **3q**

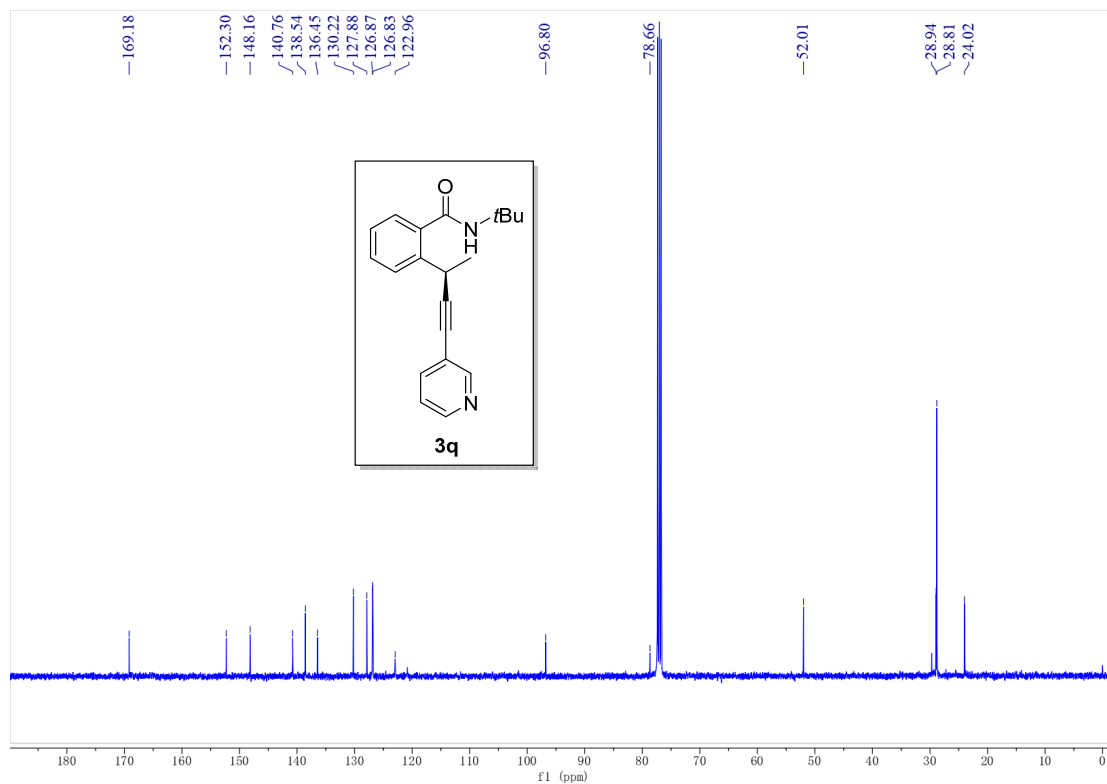

Supplementary Figure 103 <sup>13</sup>C NMR of **3q**

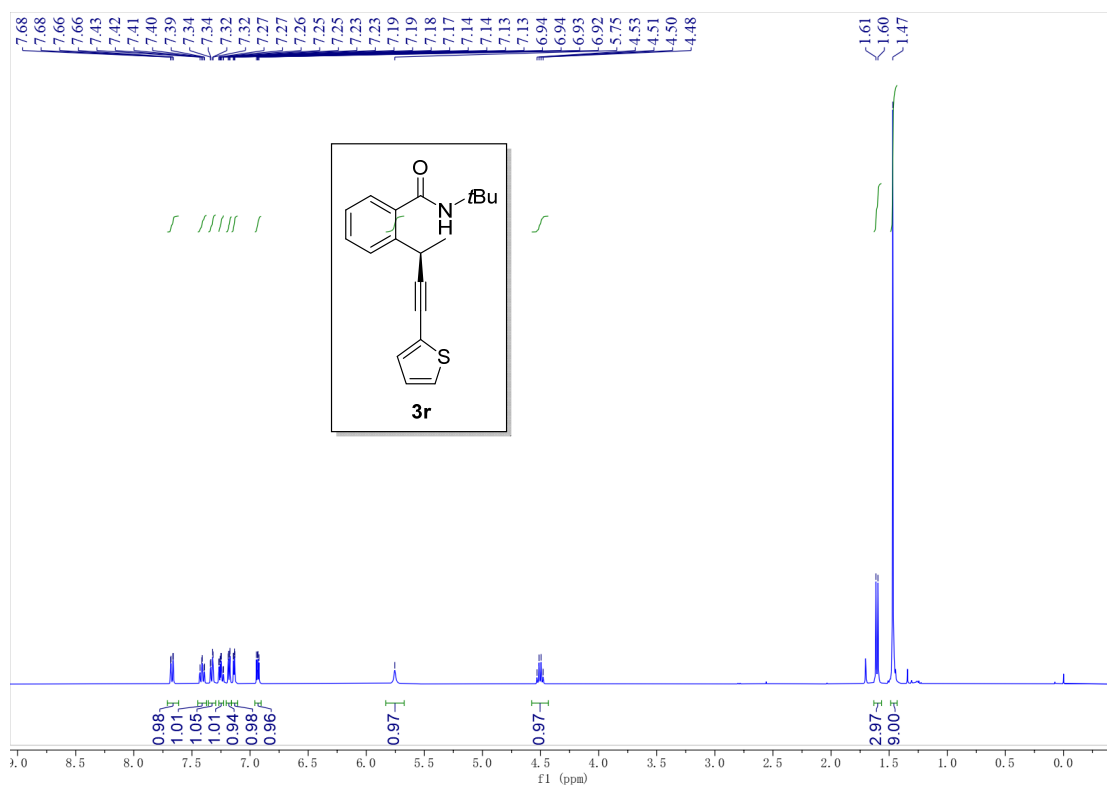

Supplementary Figure 104 <sup>1</sup>H NMR of **3r**

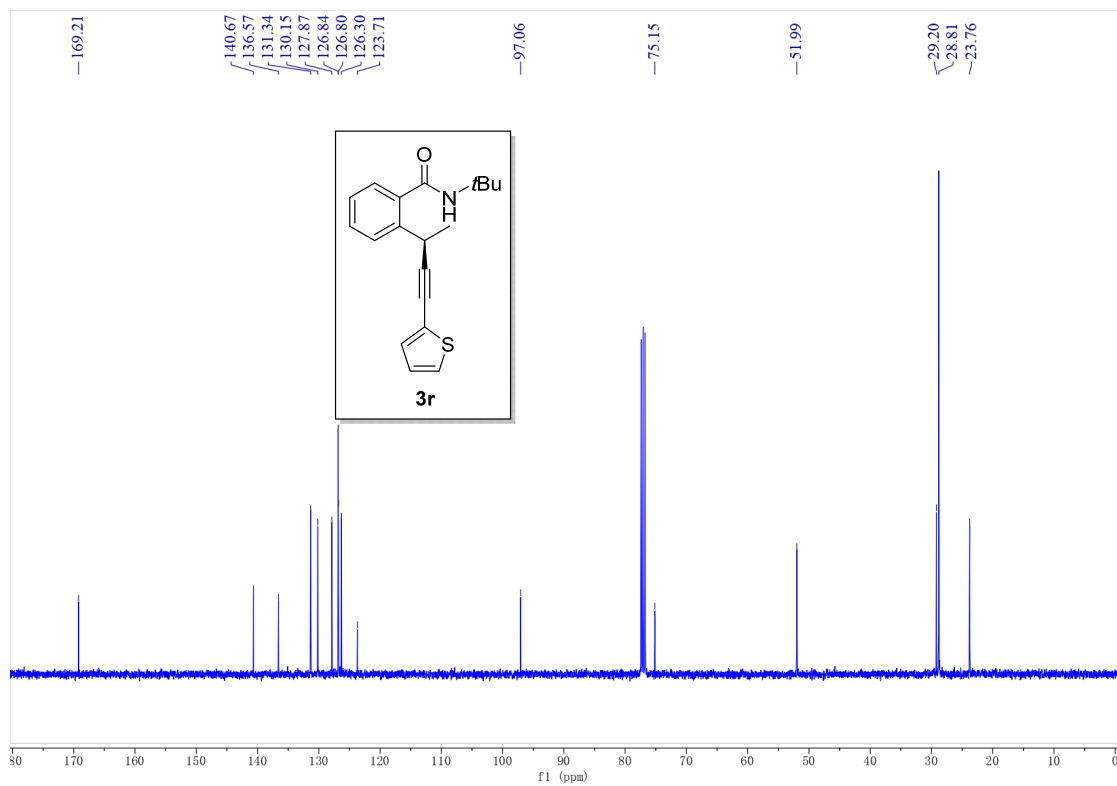

Supplementary Figure 105  $^{13}\text{C}$  NMR of **3r**

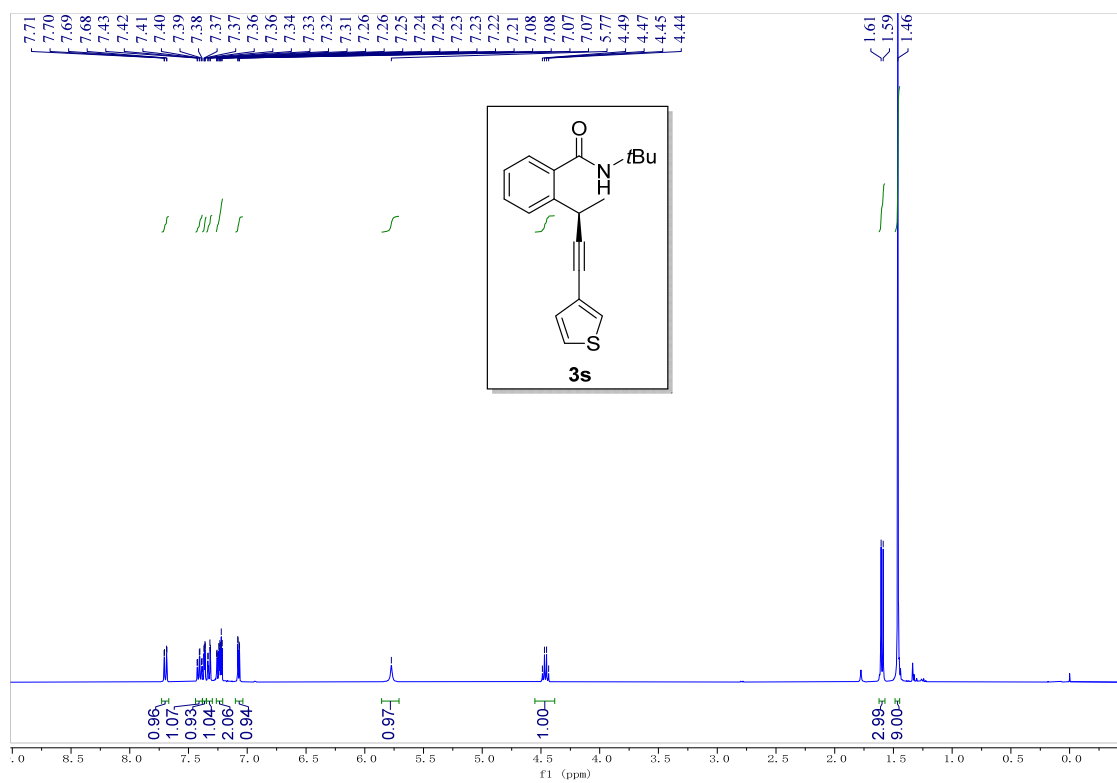

Supplementary Figure 106  $^1\text{H}$  NMR of **3s**



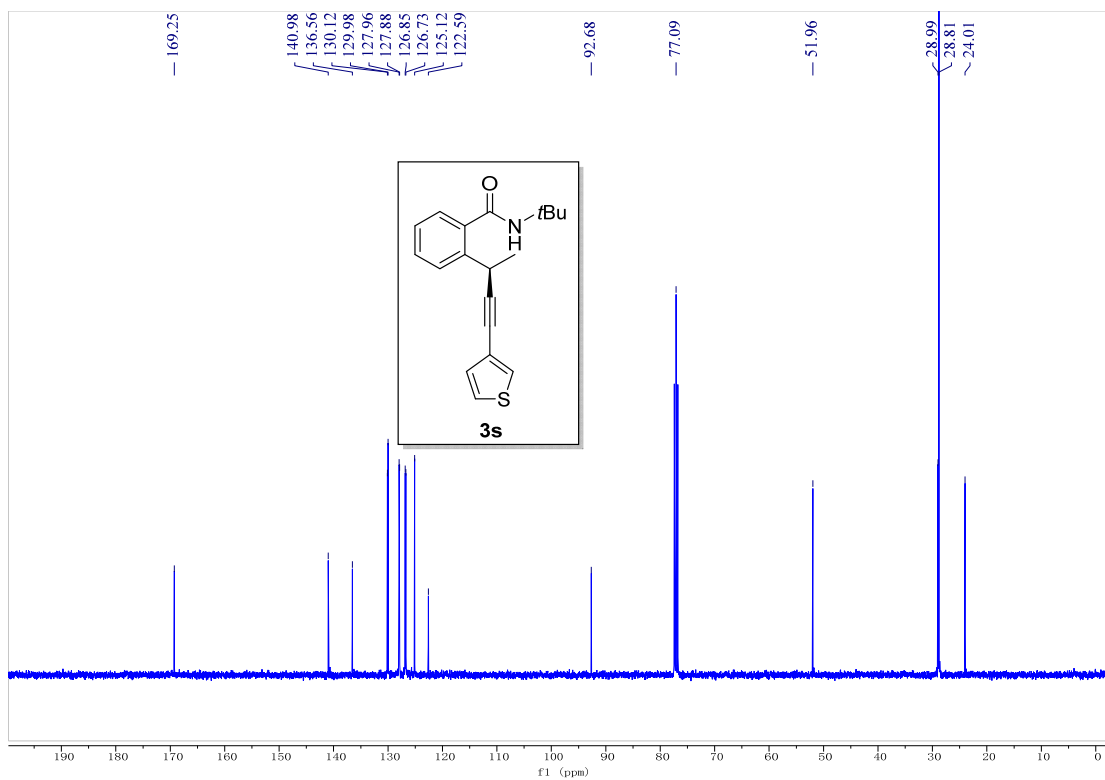

Supplementary Figure 107 <sup>13</sup>C NMR of **3s**

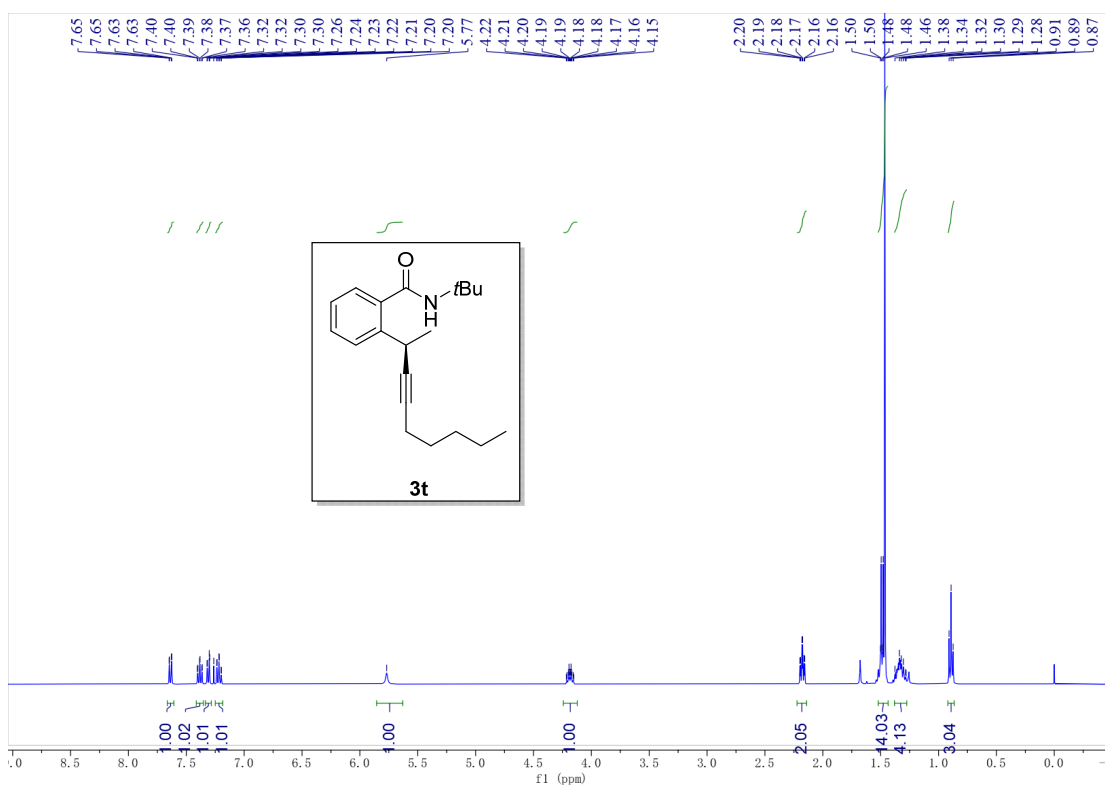

Supplementary Figure 108 <sup>1</sup>H NMR of **3t**

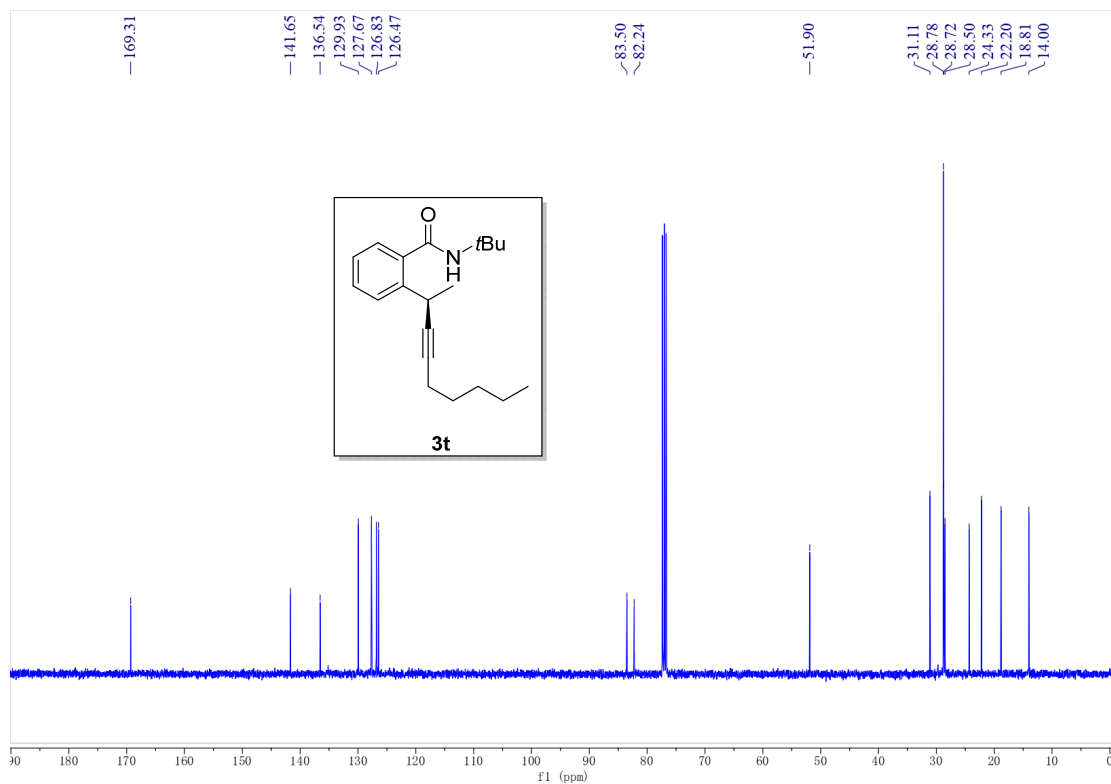

Supplementary Figure 109 <sup>13</sup>C NMR of **3t**

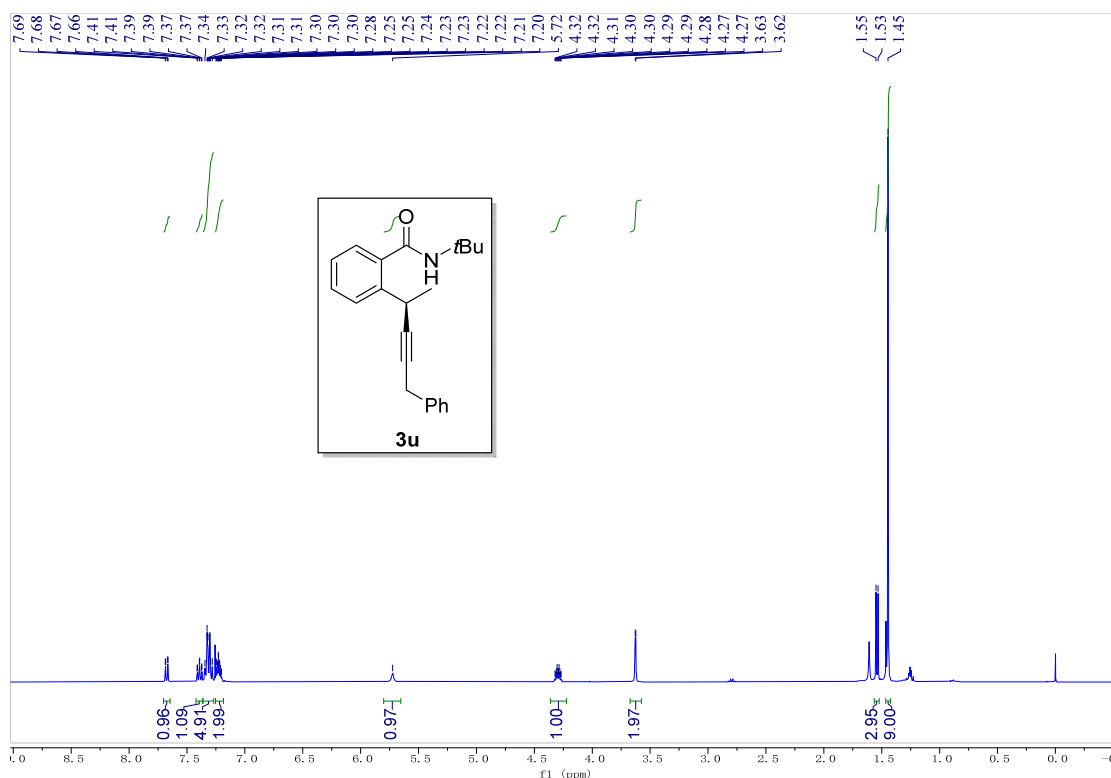

Supplementary Figure 110 <sup>1</sup>H NMR of **3u**

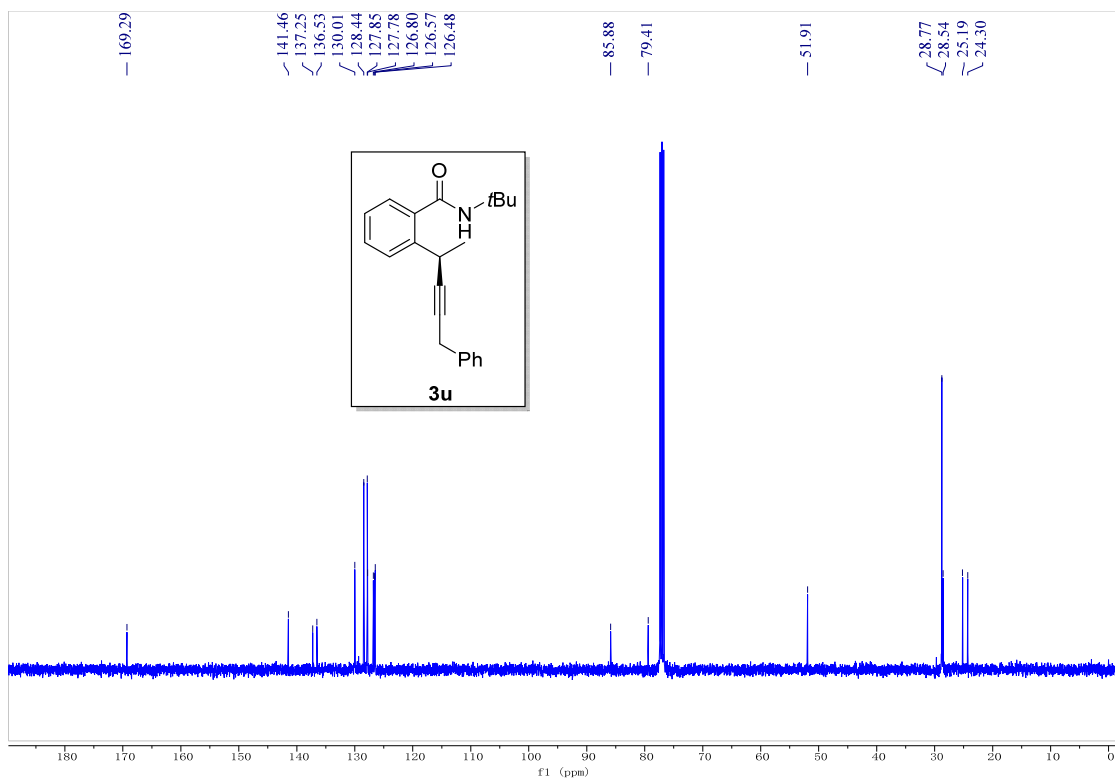

Supplementary Figure 111 <sup>13</sup>C NMR of **3u**

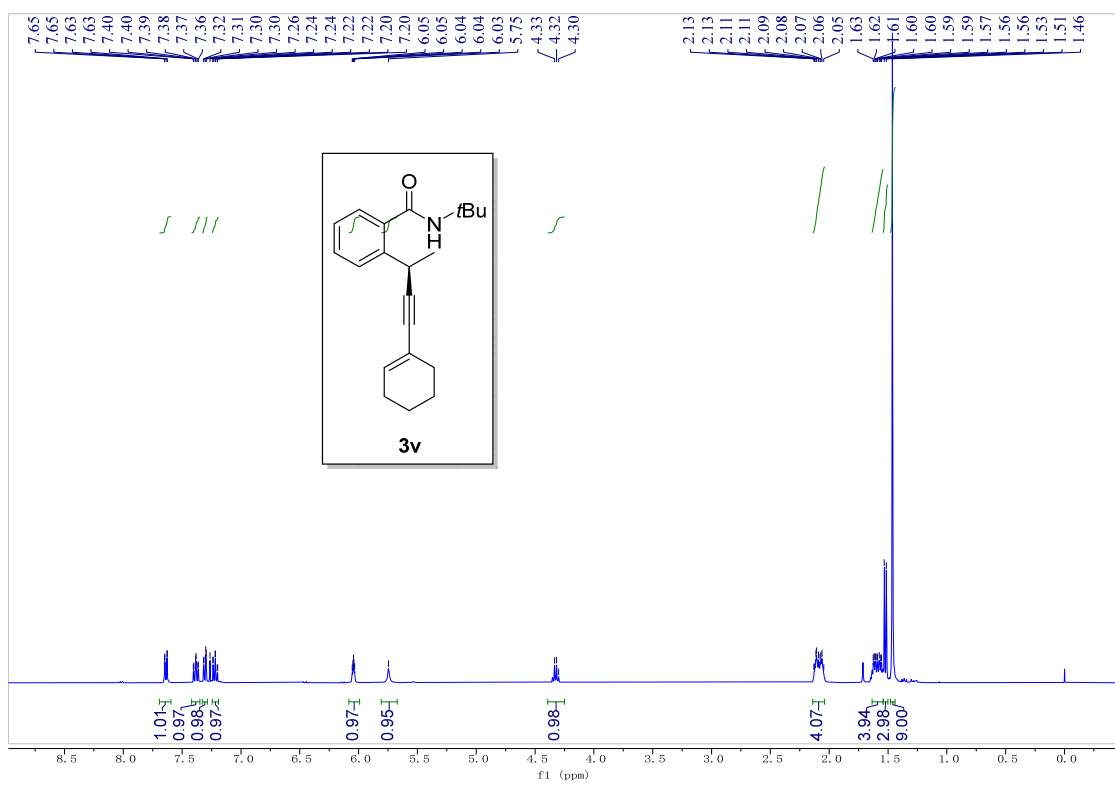

Supplementary Figure 112 <sup>1</sup>H NMR of **3v**

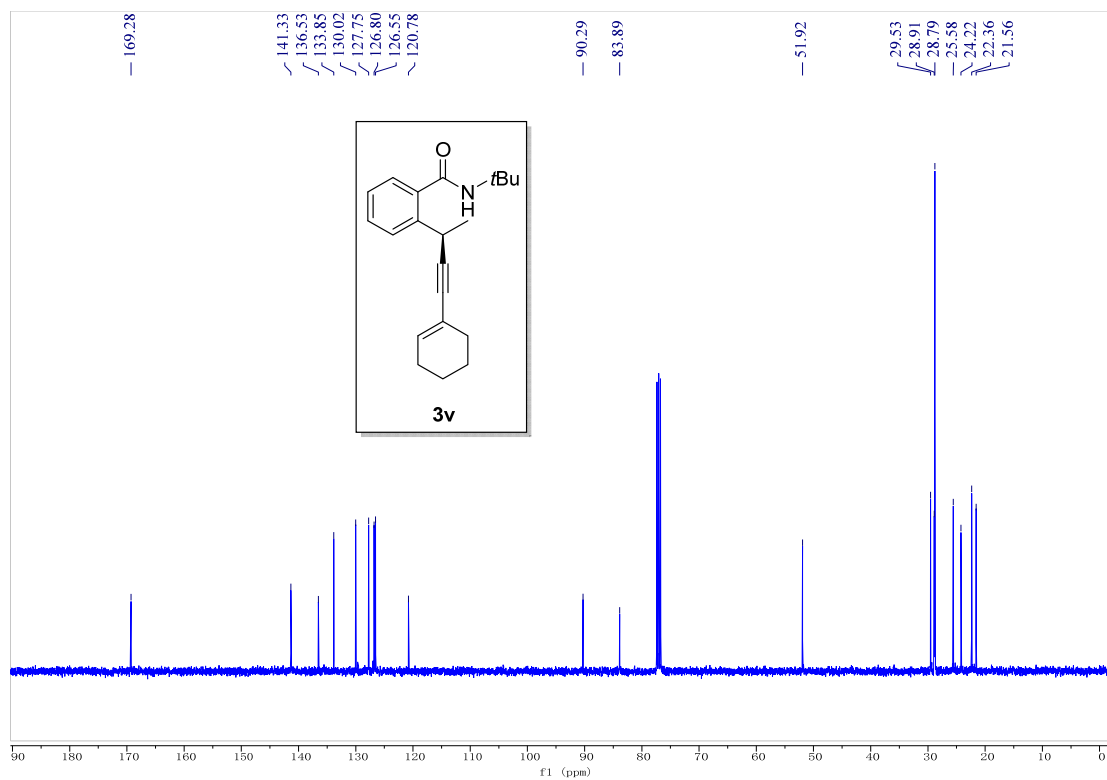

Supplementary Figure 113 <sup>13</sup>C NMR of **3v**

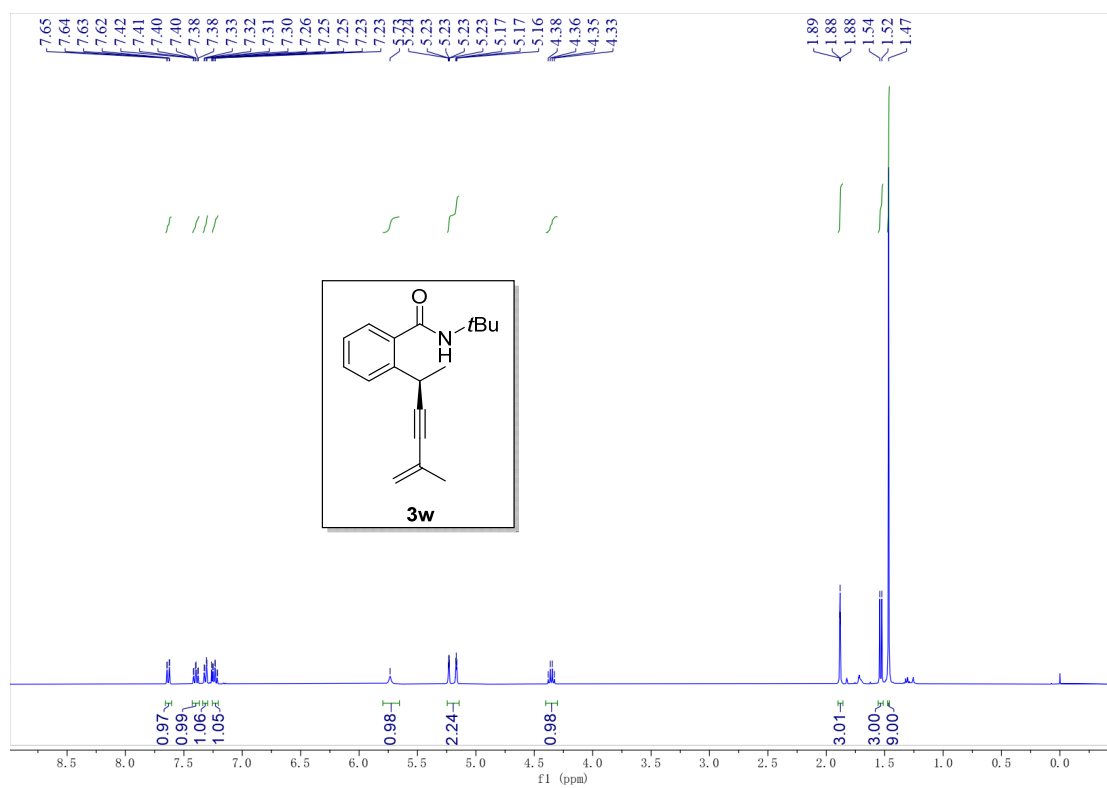

Supplementary Figure 114 <sup>1</sup>H NMR of **3w**

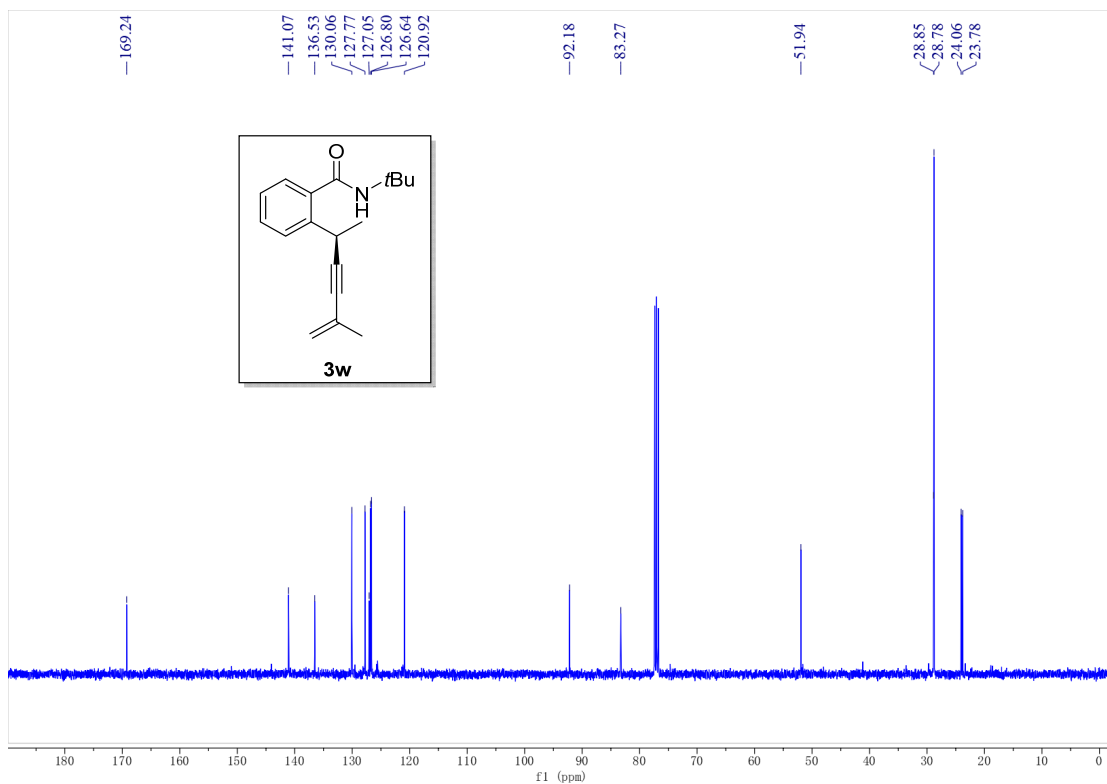

Supplementary Figure 115 <sup>13</sup>C NMR of **3w**

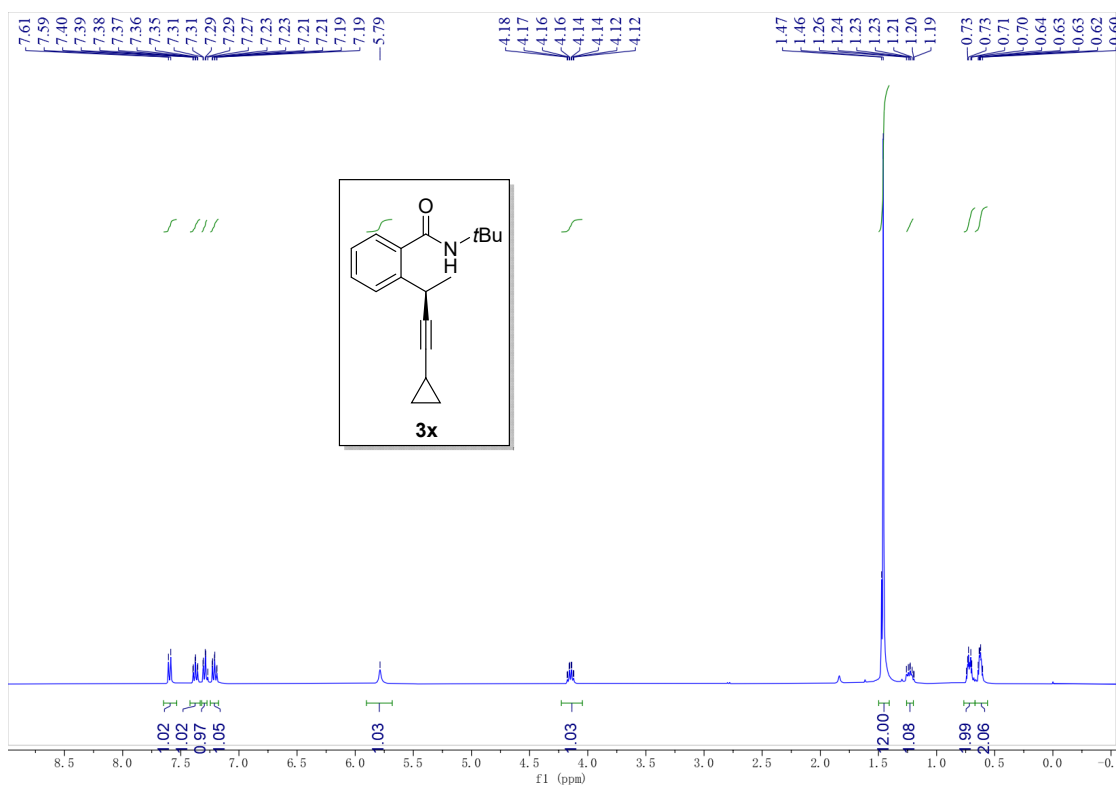

Supplementary Figure 116 <sup>1</sup>H NMR of **3x**

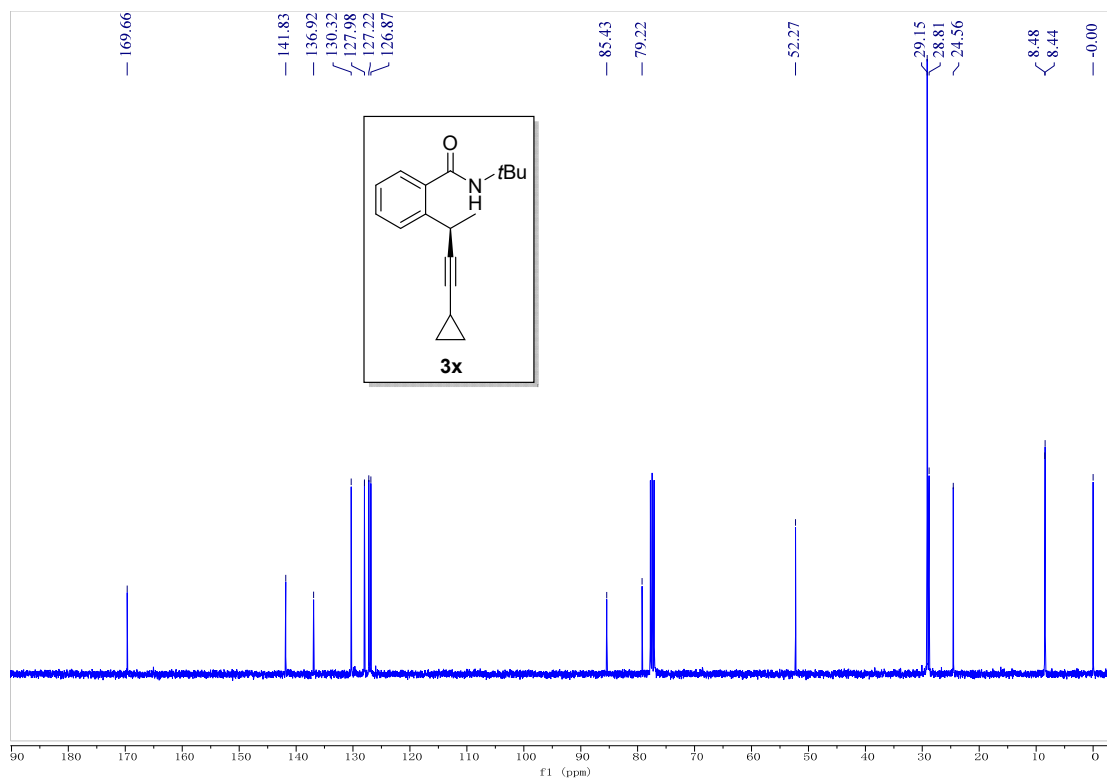

Supplementary Figure 117  $^{13}\text{C}$  NMR of **3x**

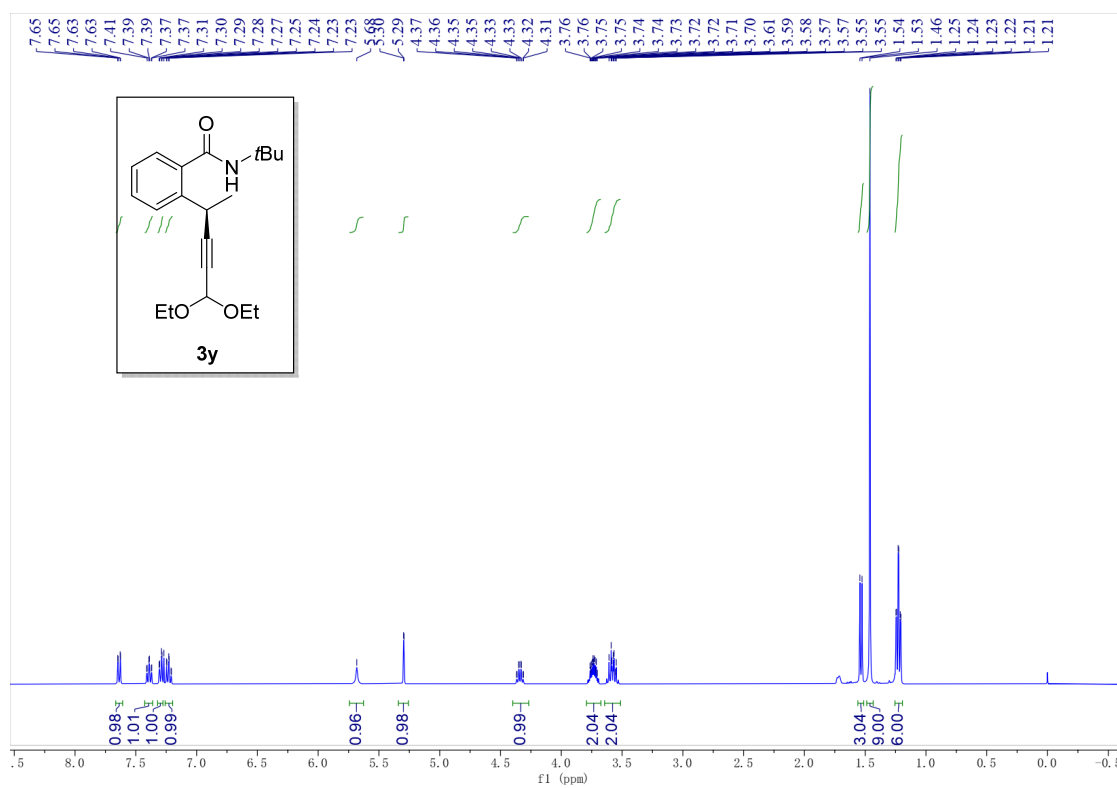

Supplementary Figure 118  $^1\text{H}$  NMR of **3y**

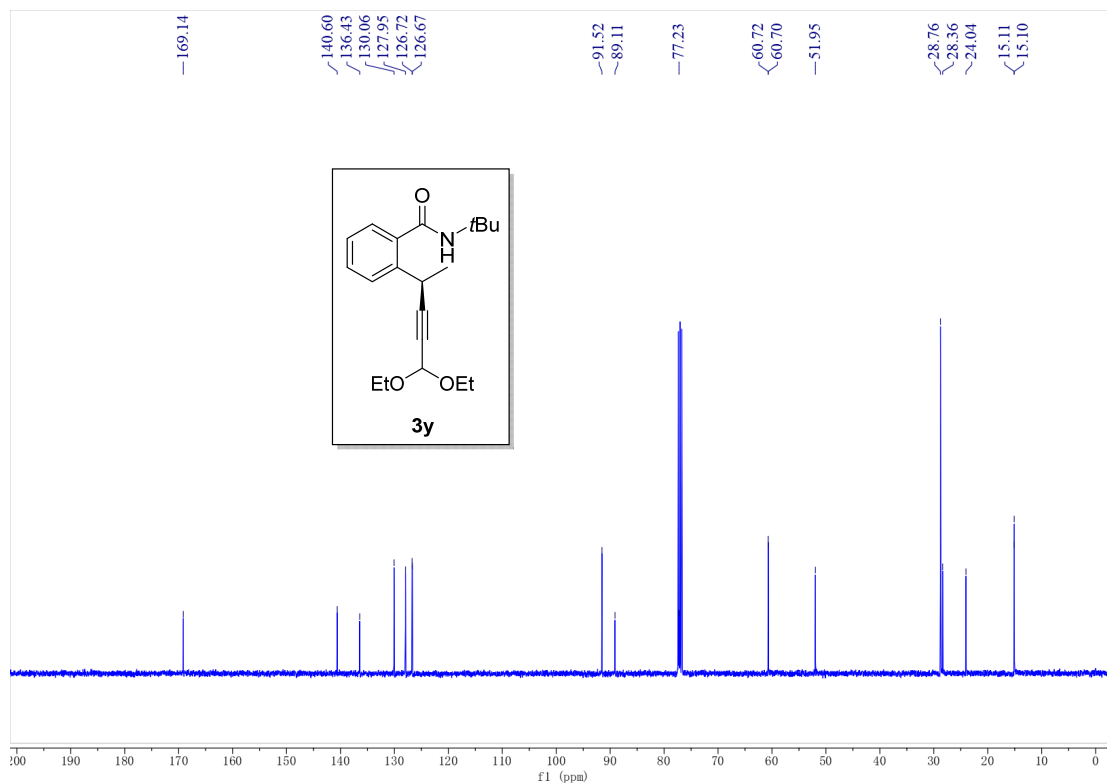

Supplementary Figure 119 <sup>13</sup>C NMR of **3y**

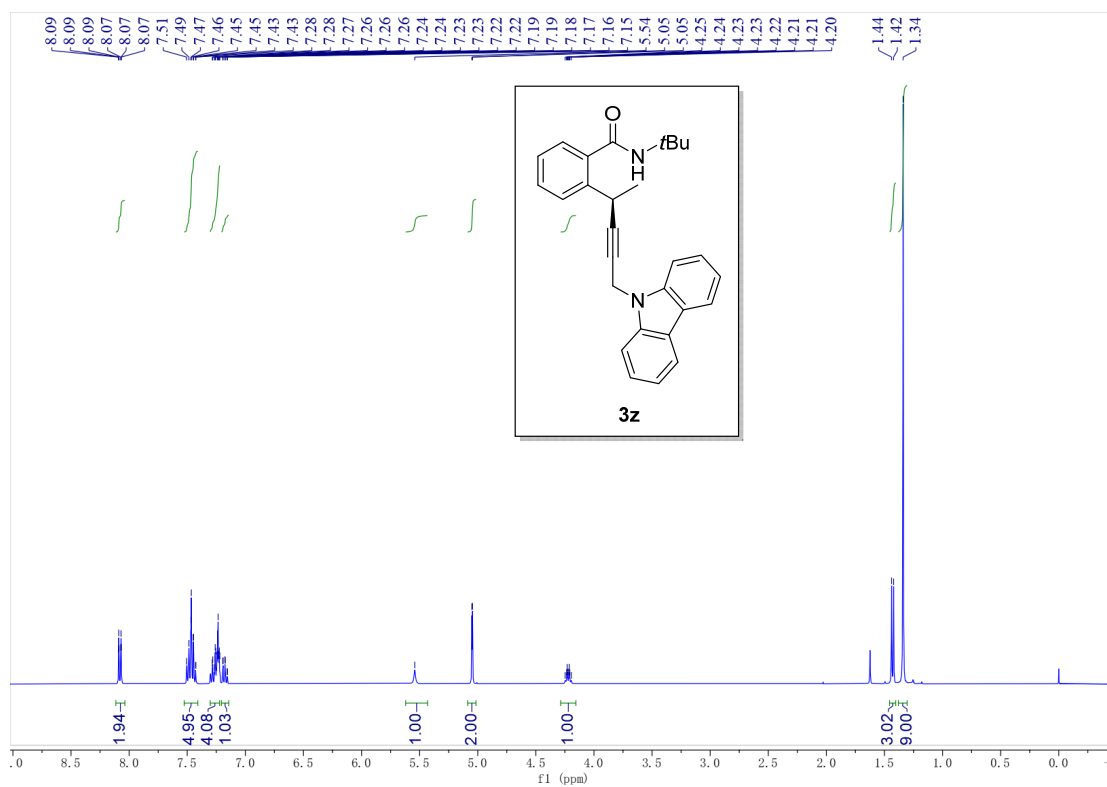

Supplementary Figure 120 <sup>1</sup>H NMR of **3z**

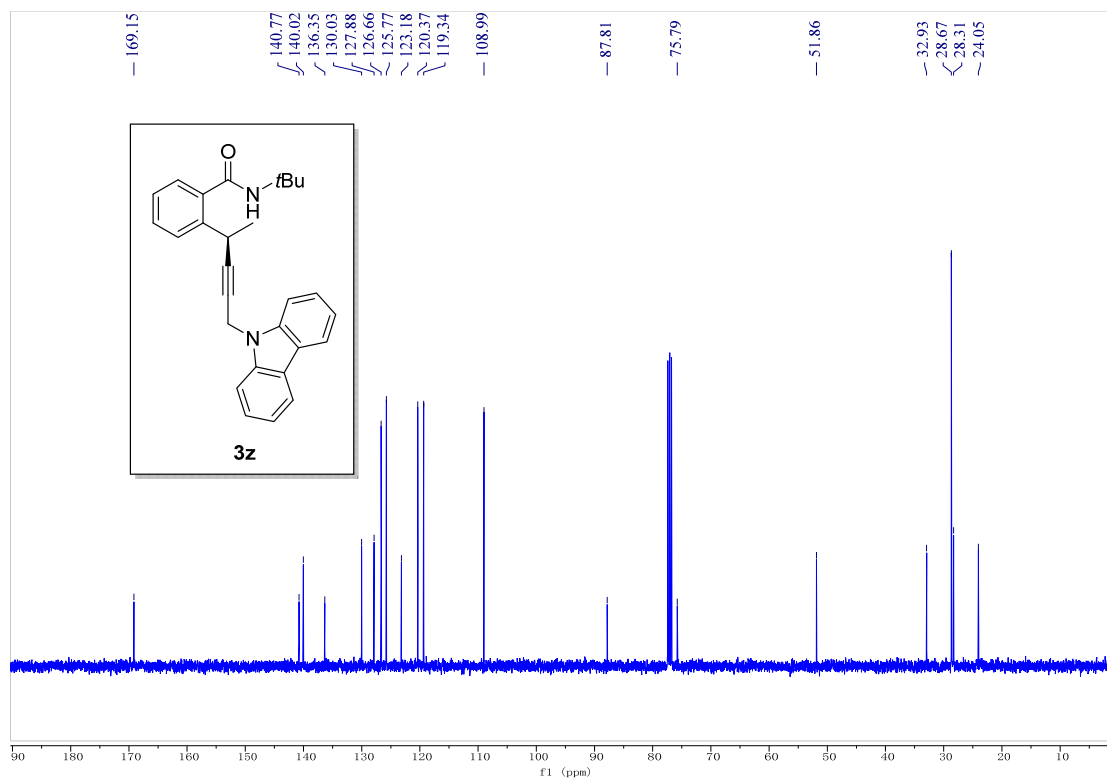

Supplementary Figure 121  $^{13}\text{C}$  NMR of **3z**

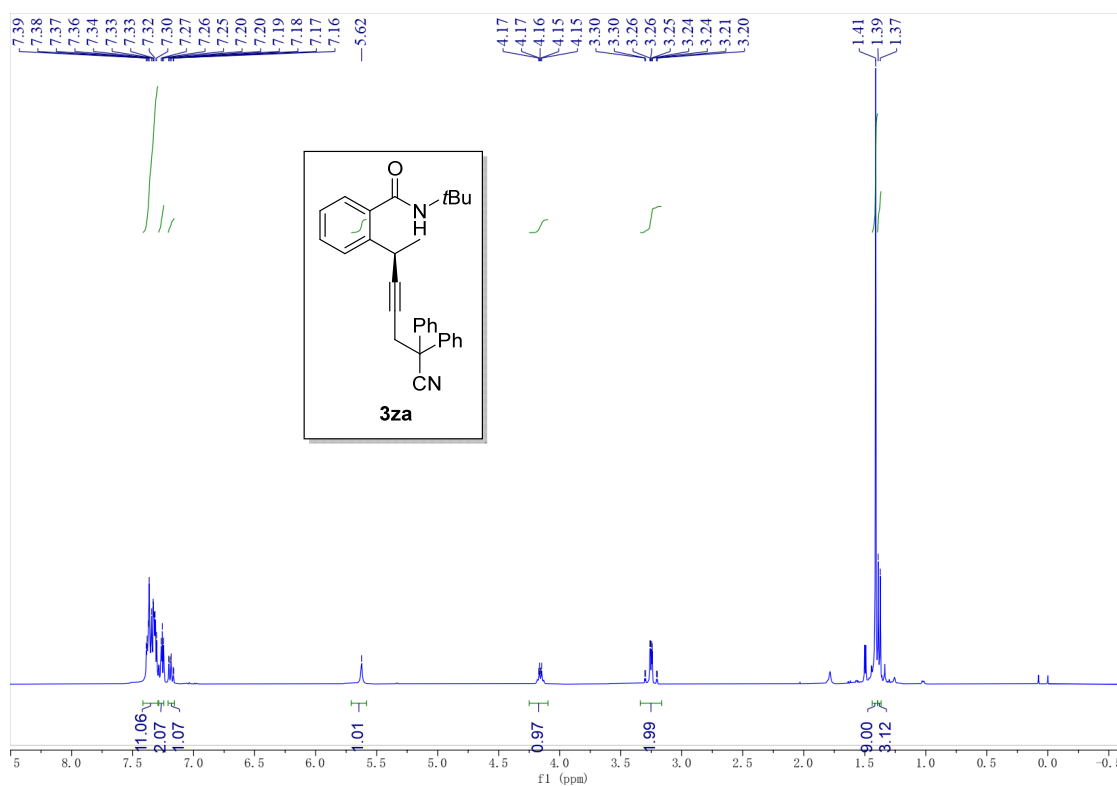

Supplementary Figure 122  $^1\text{H}$  NMR of **3za**



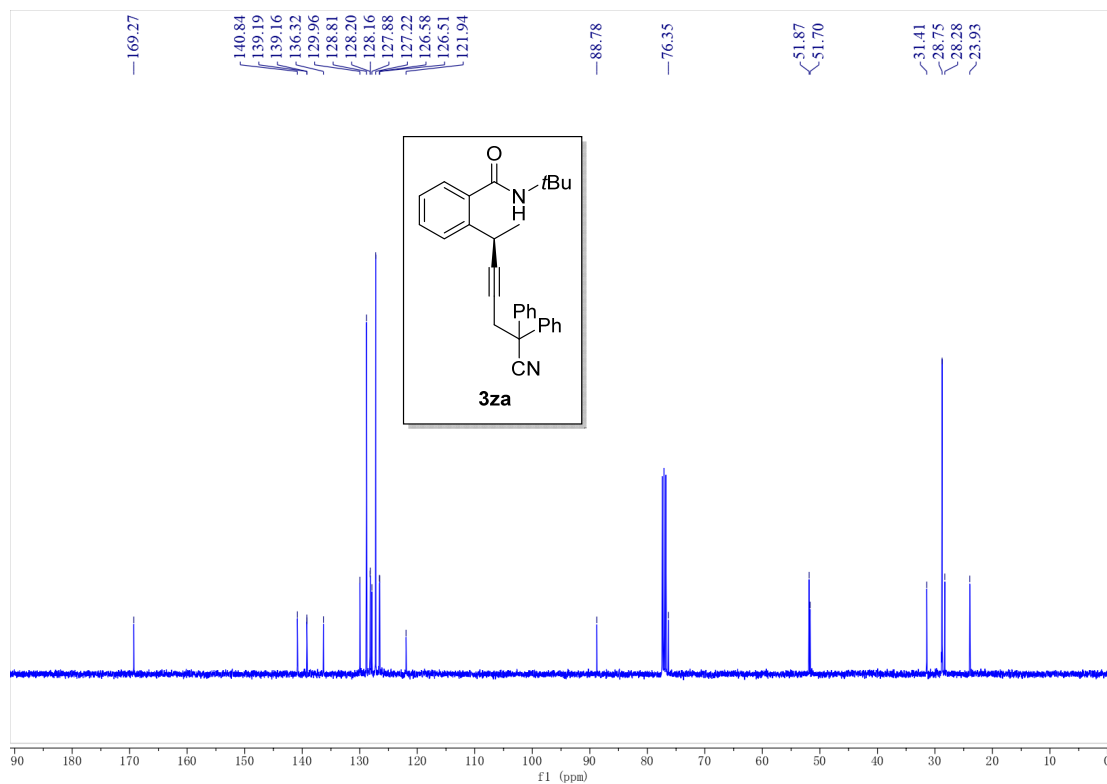

Supplementary Figure 123 <sup>13</sup>C NMR of **3za**

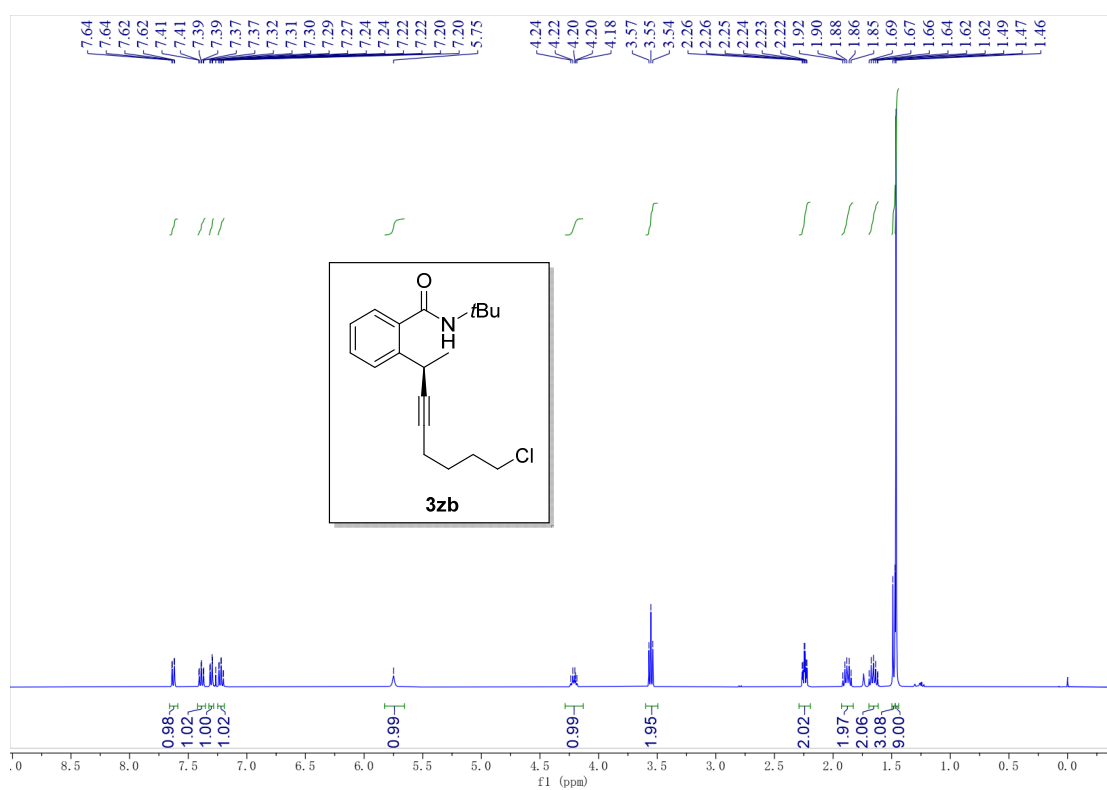

Supplementary Figure 124 <sup>1</sup>H NMR of **3zb**

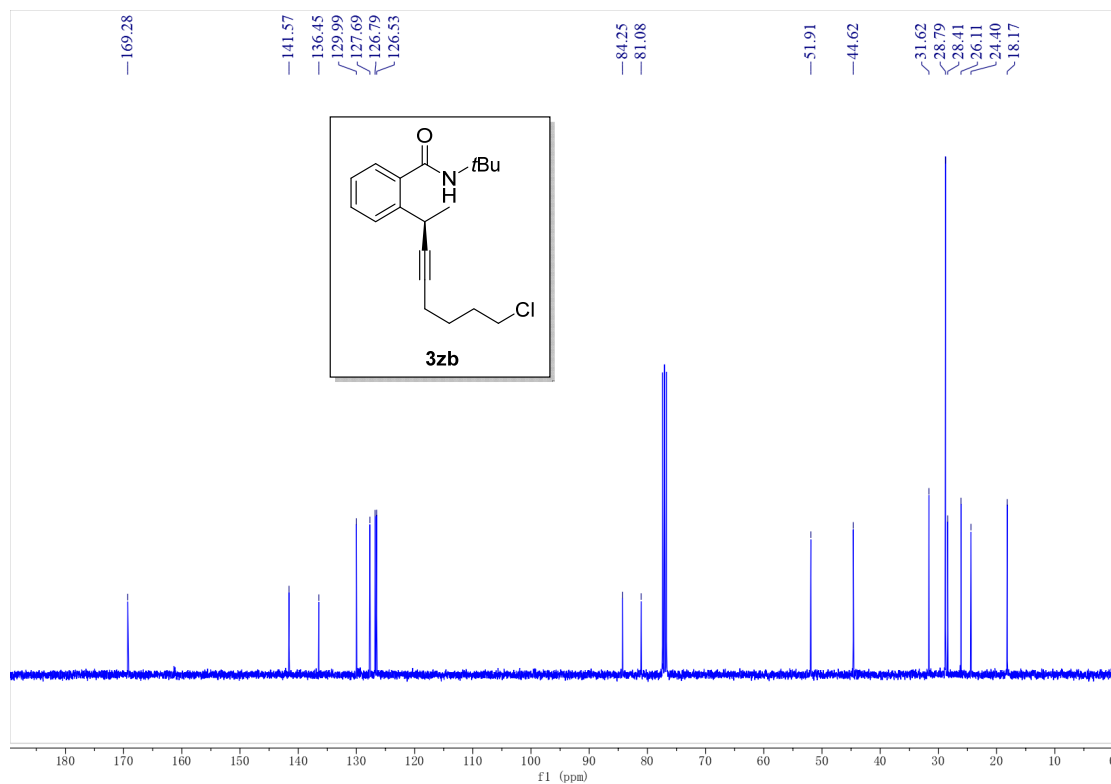

Supplementary Figure 125 <sup>13</sup>C NMR of **3zb**

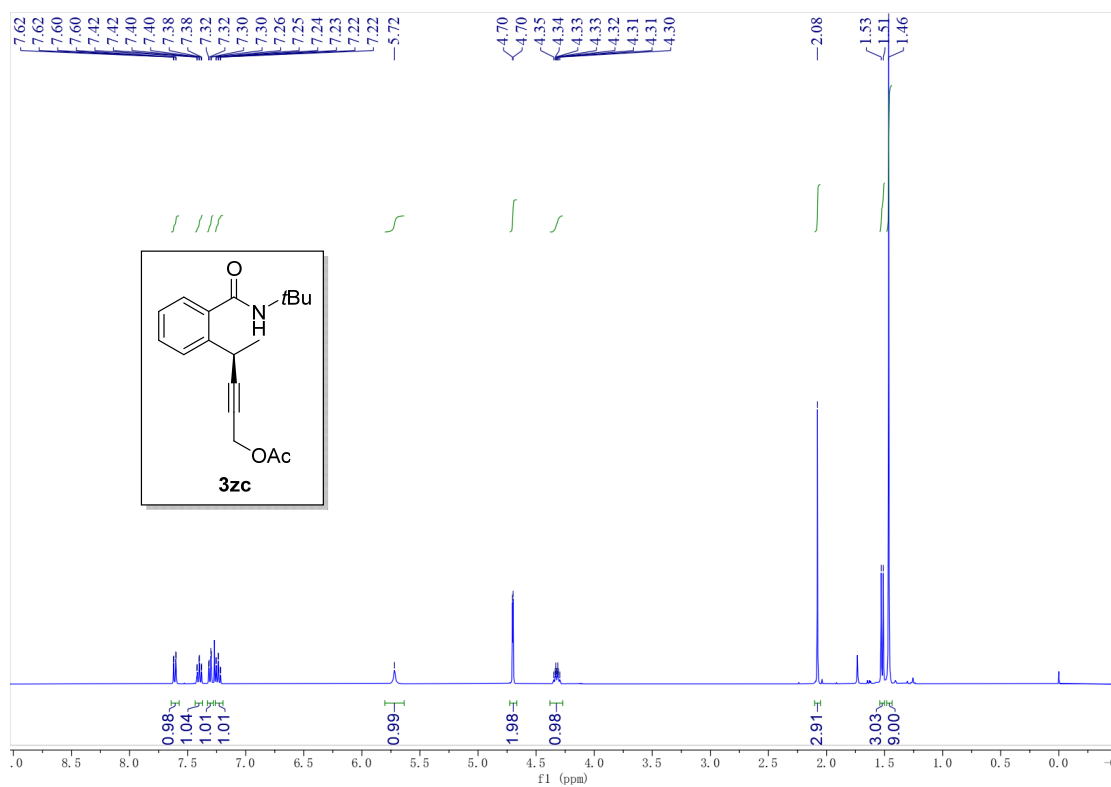

Supplementary Figure 126 <sup>1</sup>H NMR of **3zc**

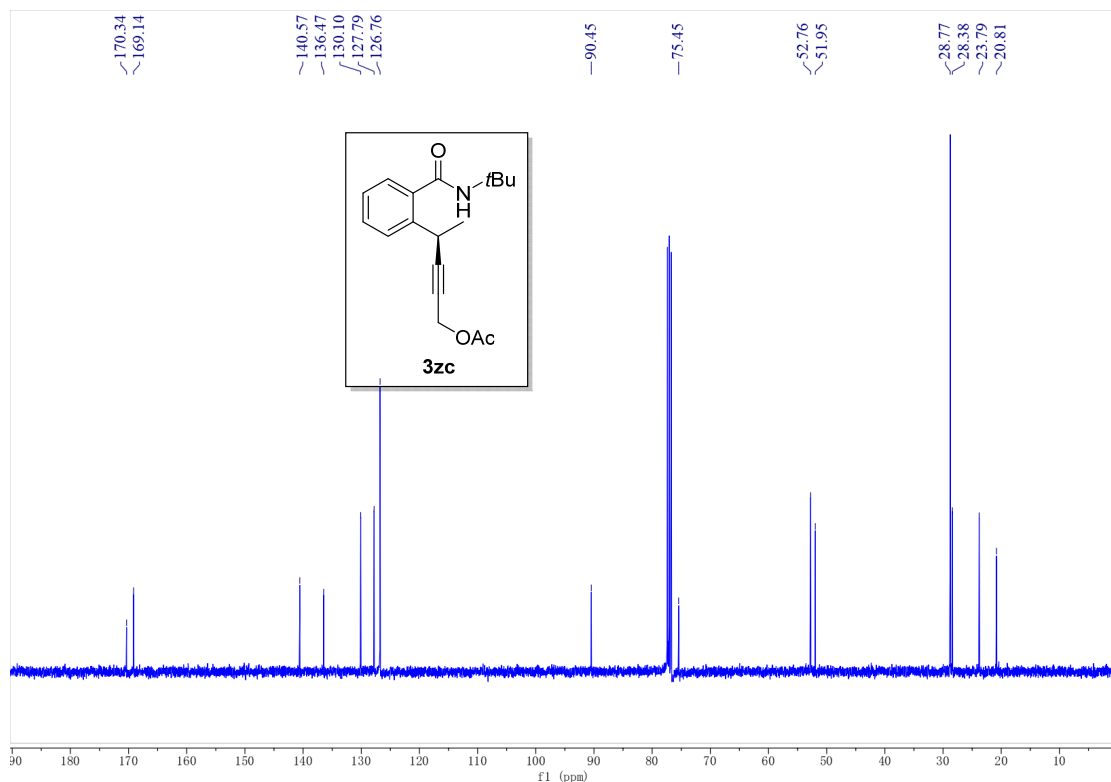

Supplementary Figure 127 <sup>13</sup>C NMR of **3zc**

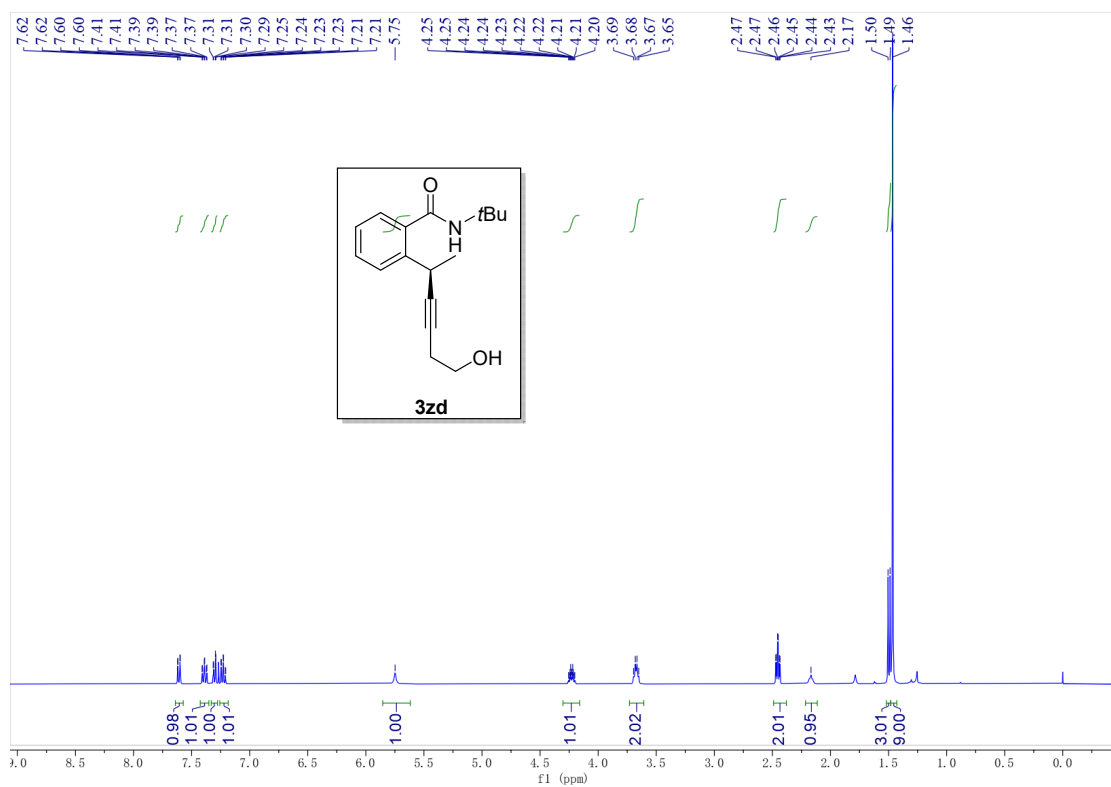

Supplementary Figure 128 <sup>1</sup>H NMR of **3zd**

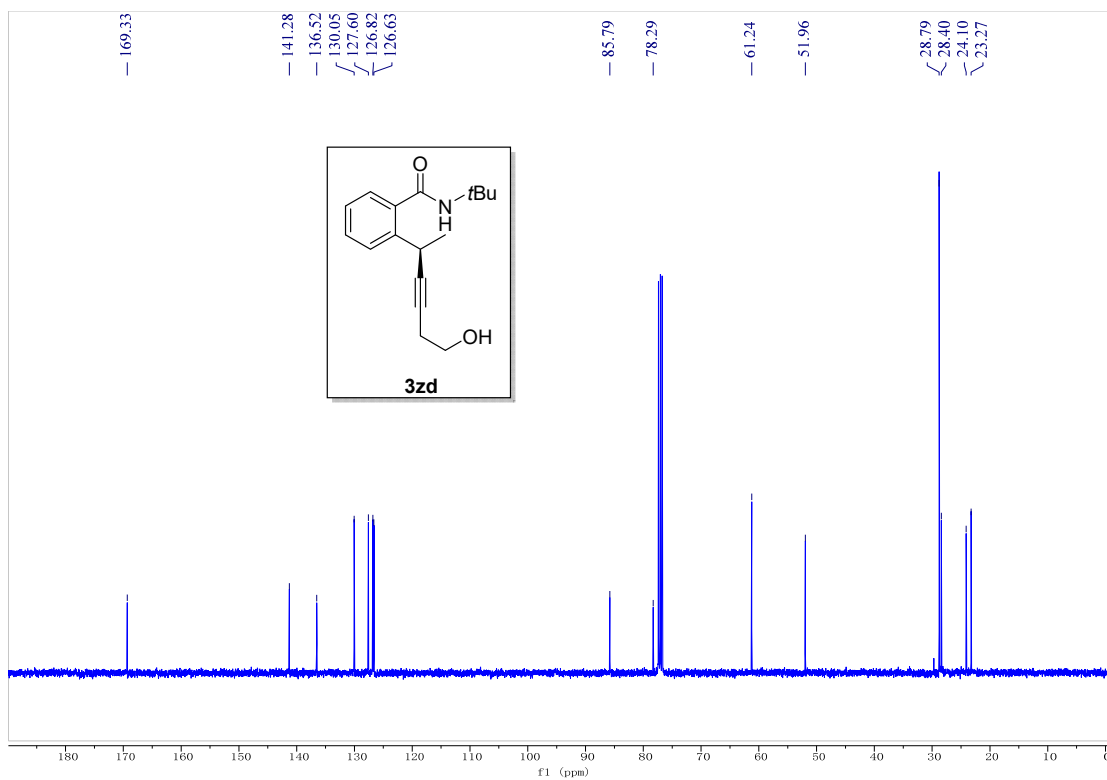

Supplementary Figure 129 <sup>13</sup>C NMR of **3zd**

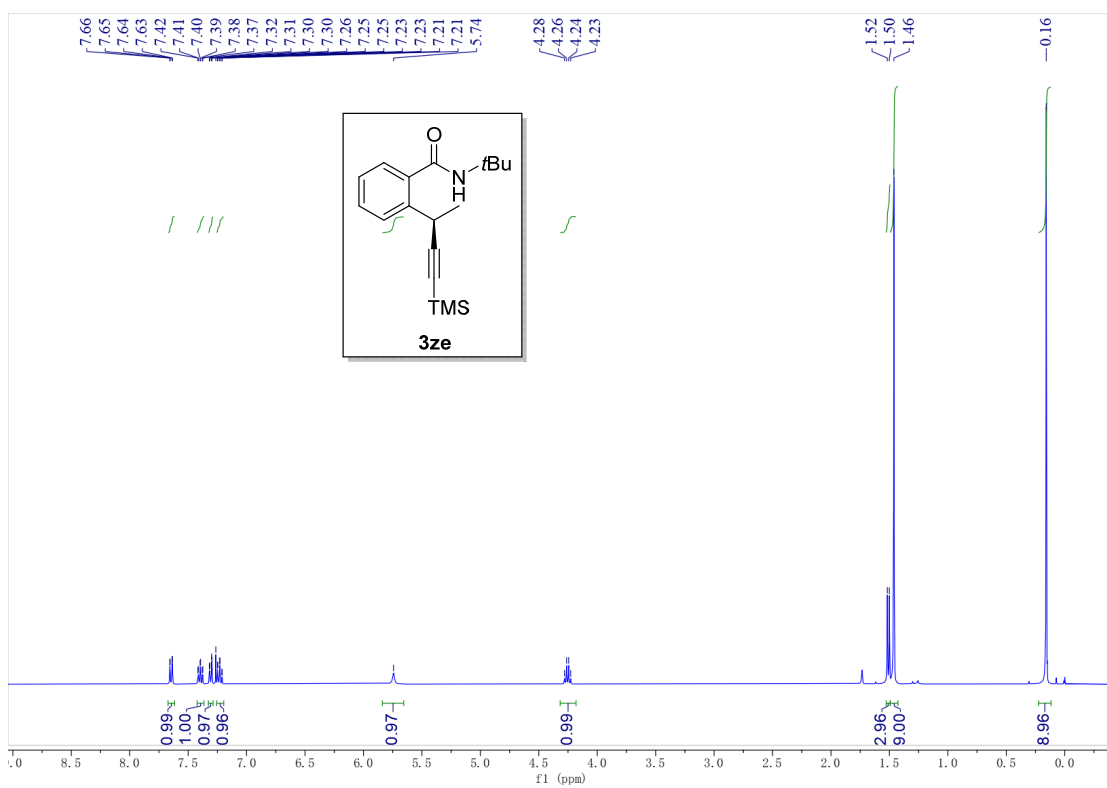

Supplementary Figure 130 <sup>1</sup>H NMR of **3ze**

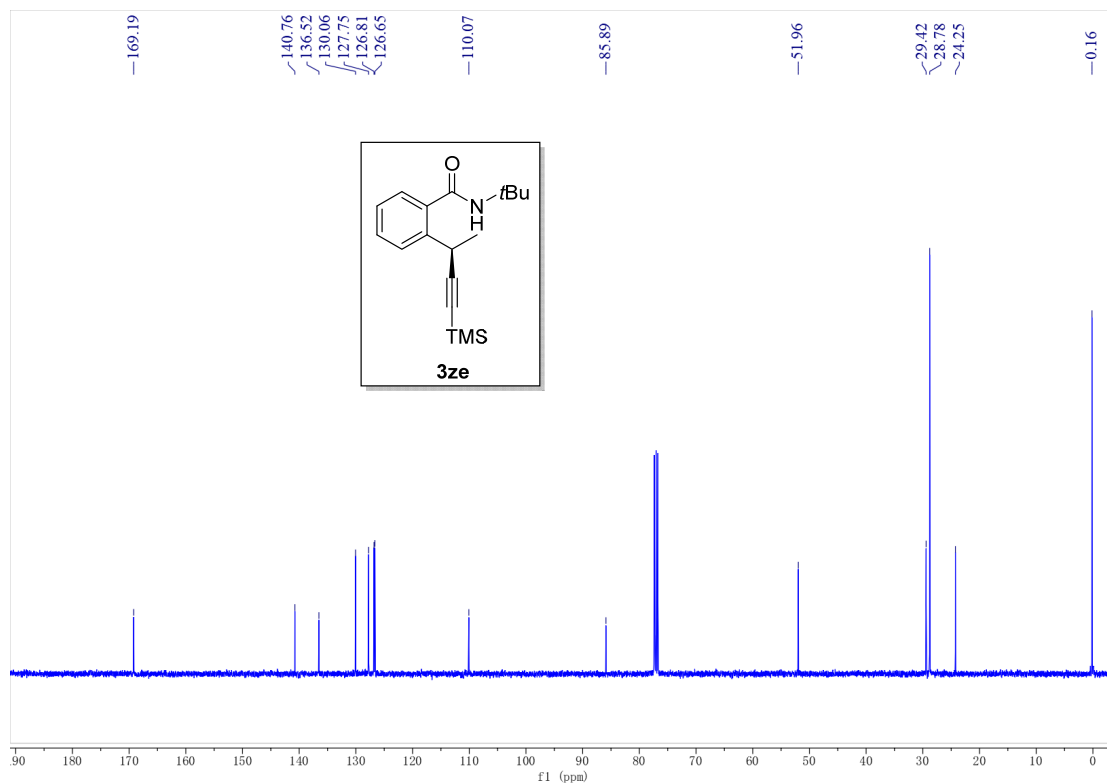

Supplementary Figure 131 <sup>13</sup>C NMR of **3ze**

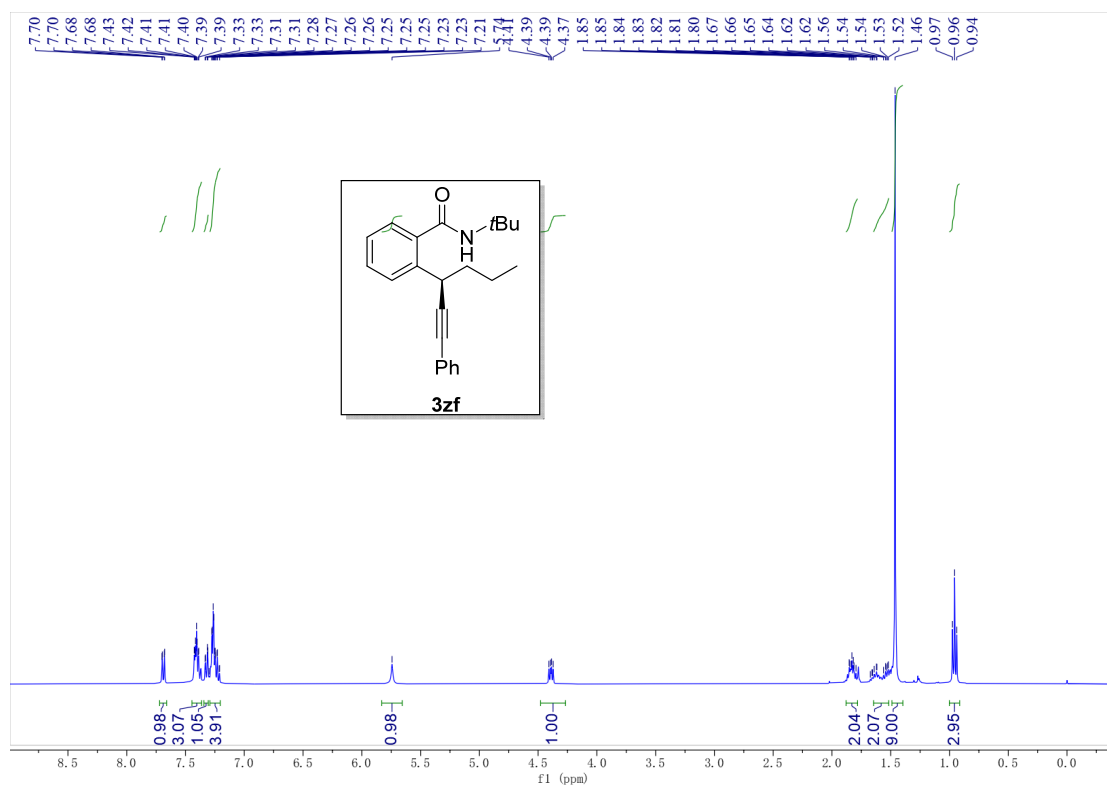

Supplementary Figure 132 <sup>1</sup>H NMR of **3zf**



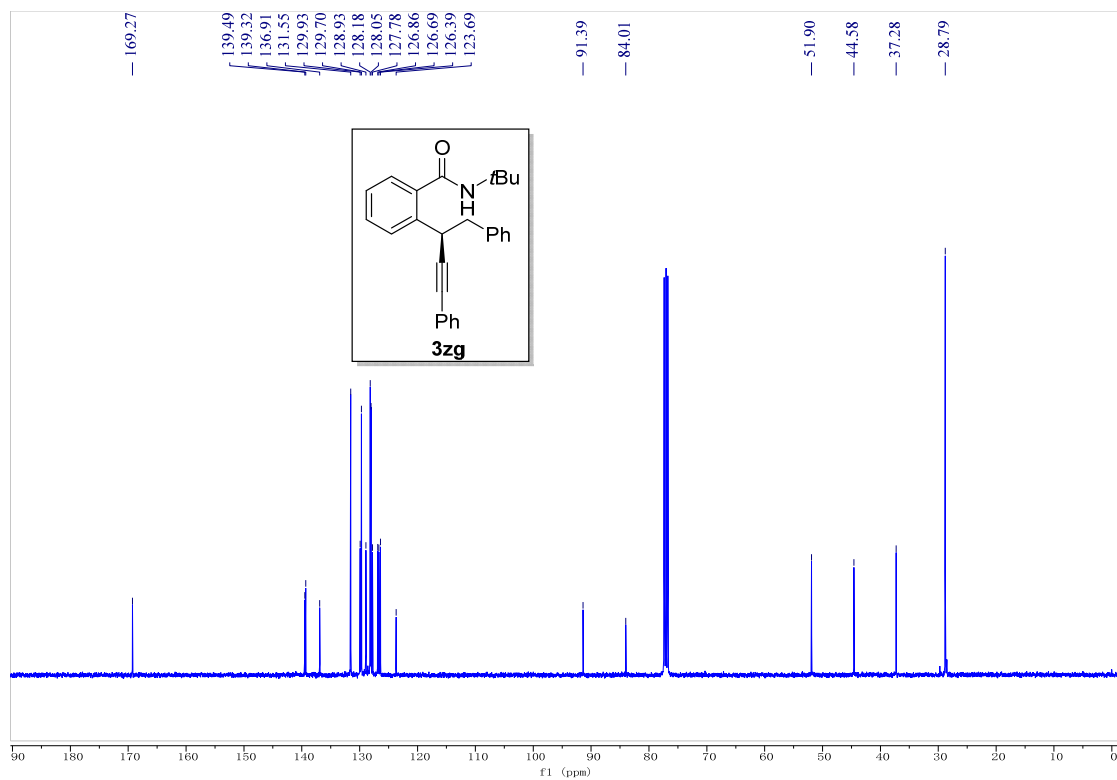

Supplementary Figure 135 <sup>13</sup>C NMR of **3zg**

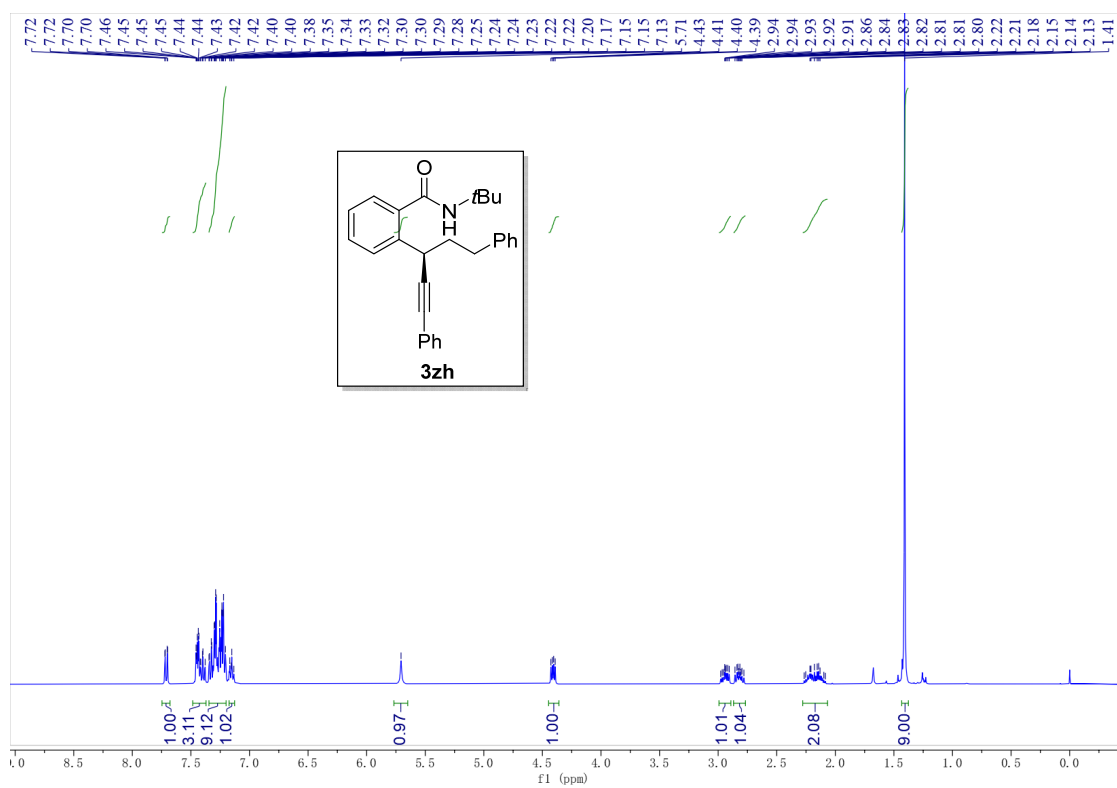

Supplementary Figure 136 <sup>1</sup>H NMR of **3zh**

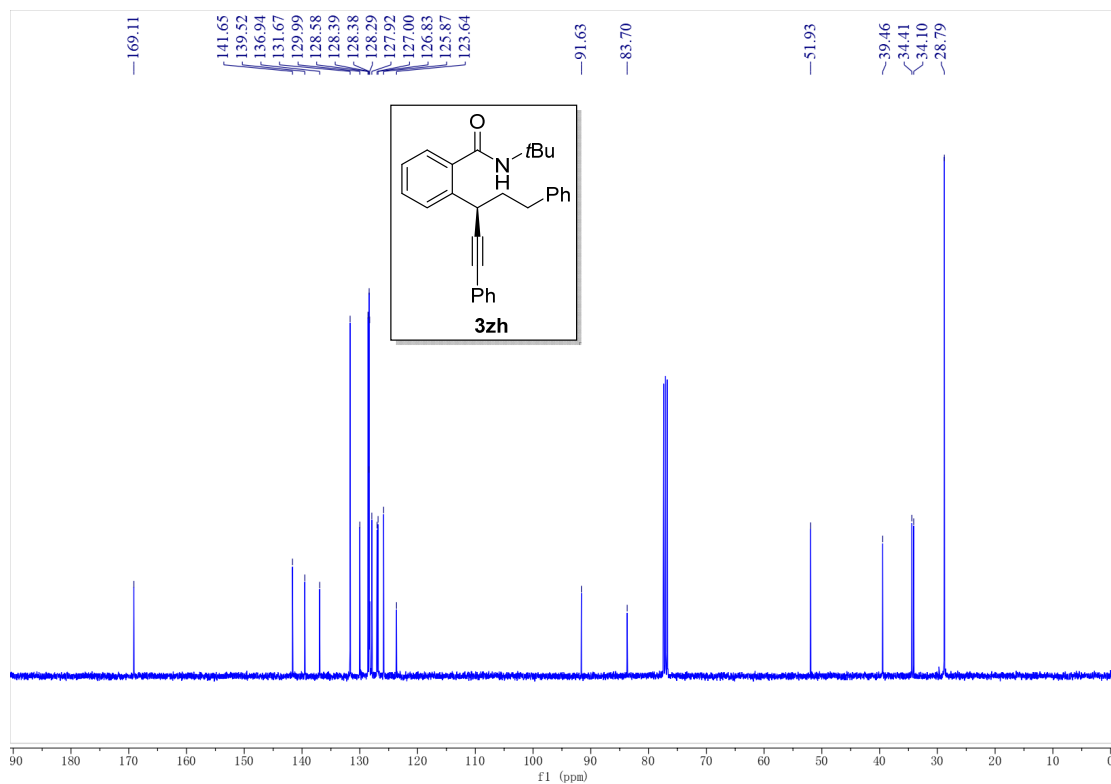

Supplementary Figure 137 <sup>13</sup>C NMR of **3zh**

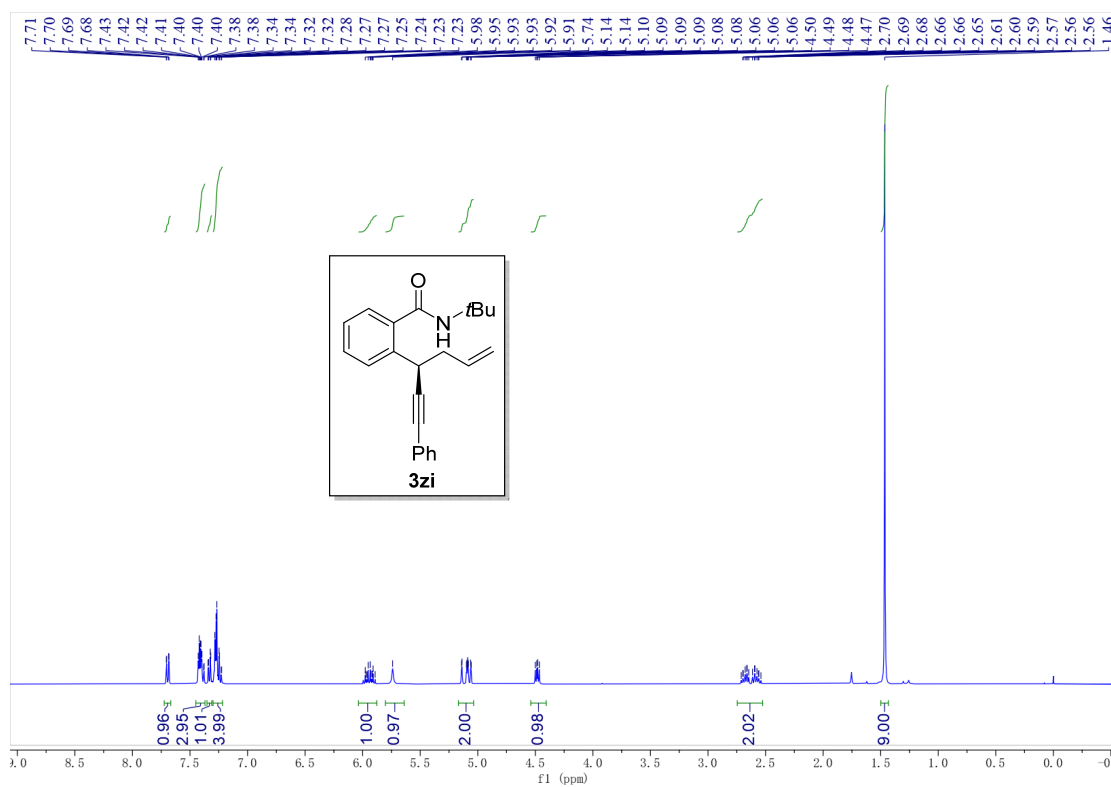

Supplementary Figure 138 <sup>1</sup>H NMR of **3zi**



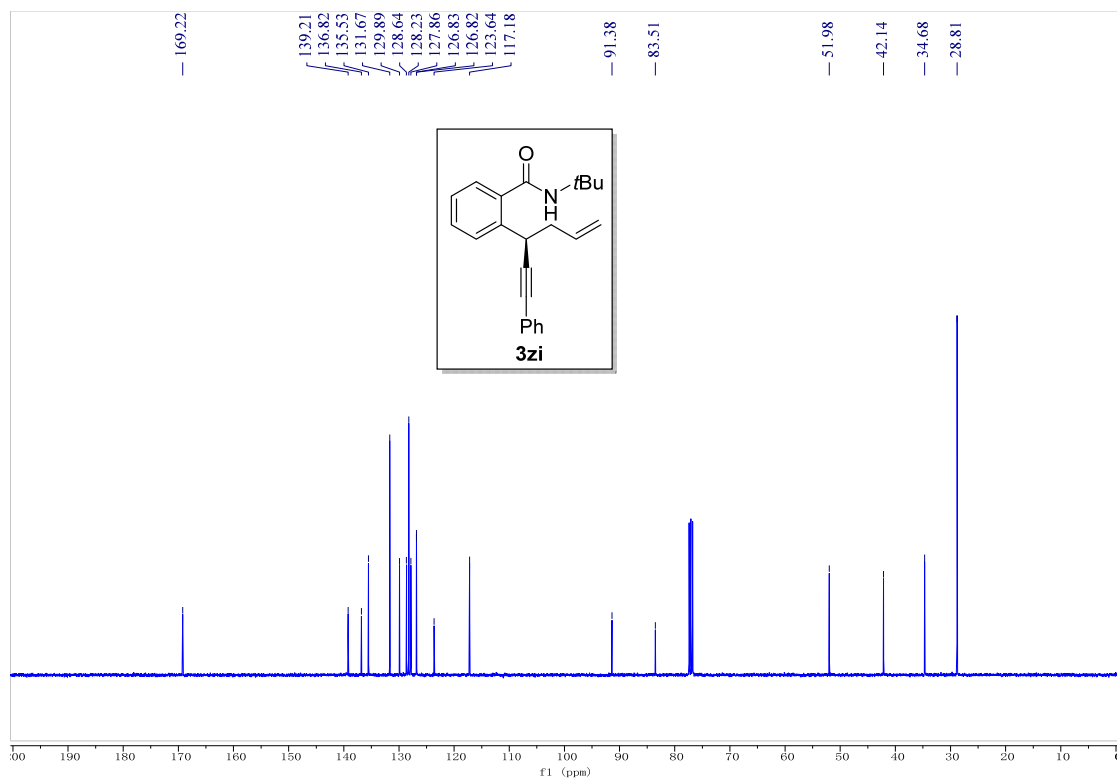

Supplementary Figure 139  $^{13}\text{C}$  NMR of **3zi**

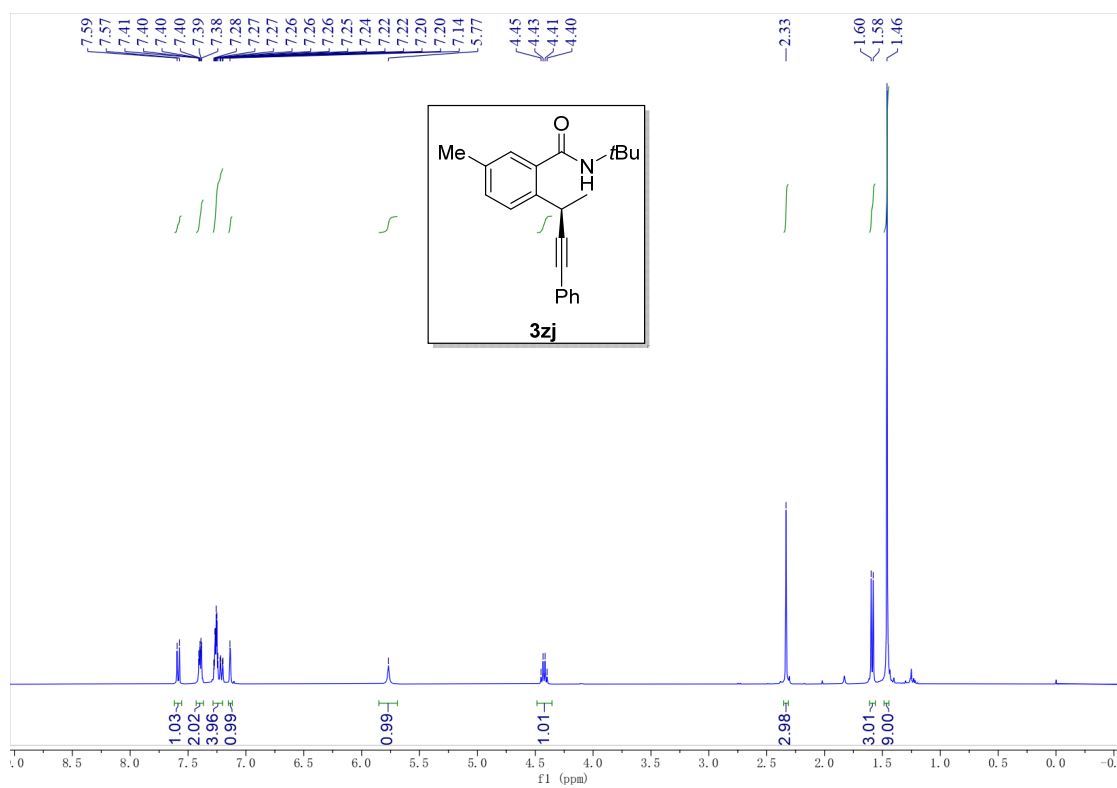

Supplementary Figure 140  $^1\text{H}$  NMR of **3zj**

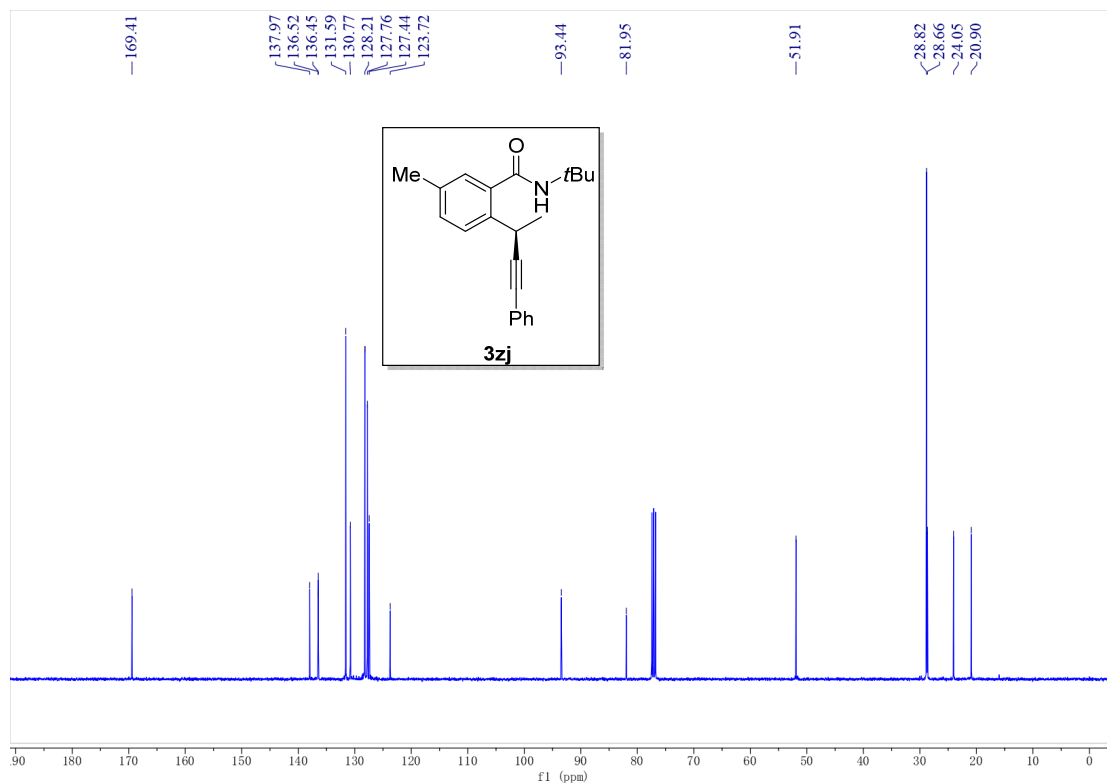

Supplementary Figure 141 <sup>13</sup>C NMR of **3zj**

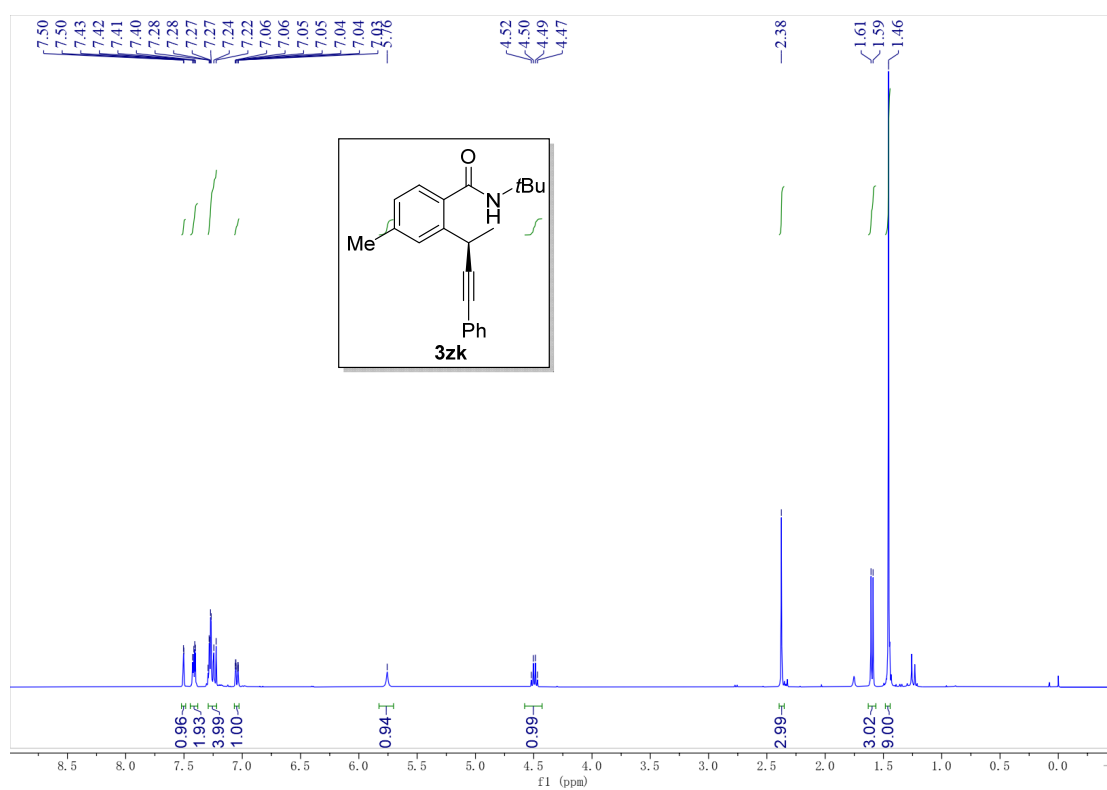

Supplementary Figure 142 <sup>1</sup>H NMR of **3zk**

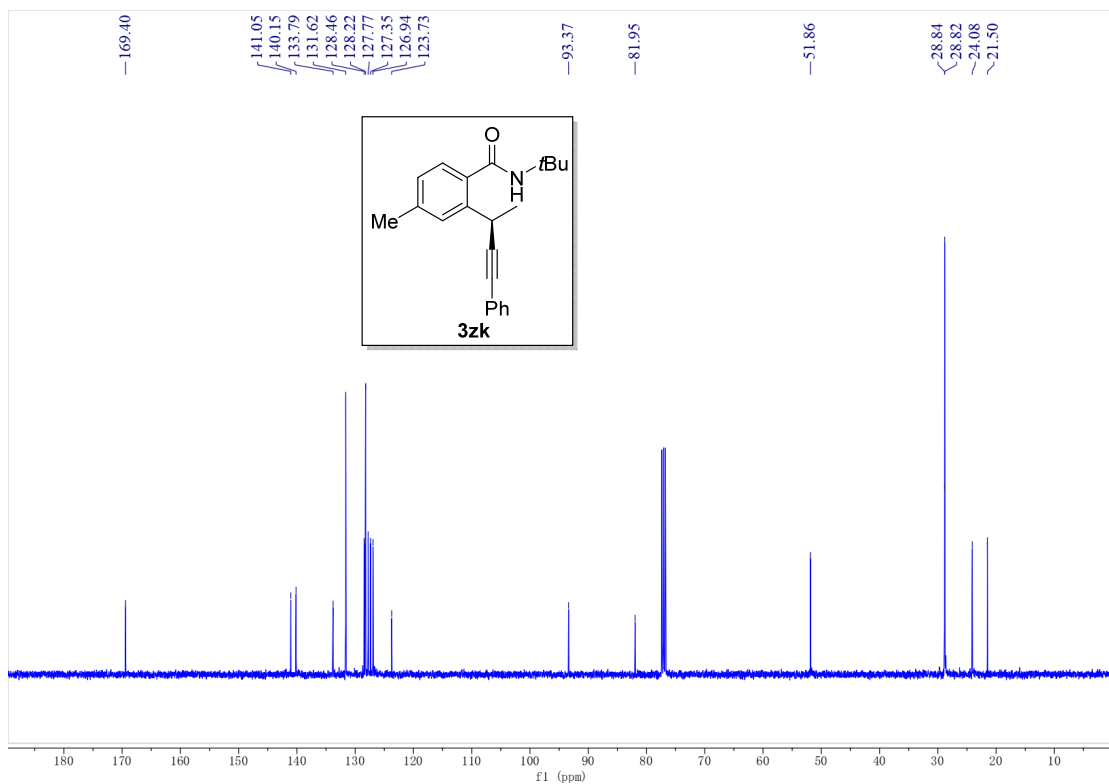

Supplementary Figure 143 <sup>13</sup>C NMR of **3zk**

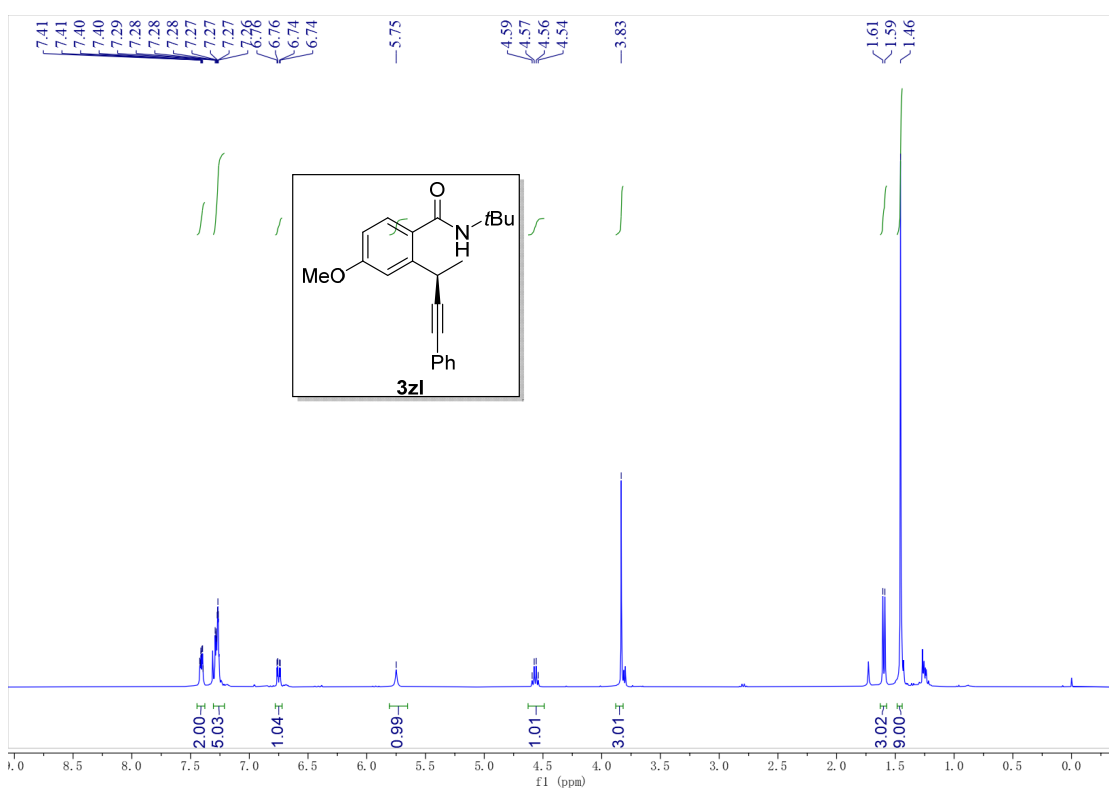

Supplementary Figure 144 <sup>1</sup>H NMR of **3zl**

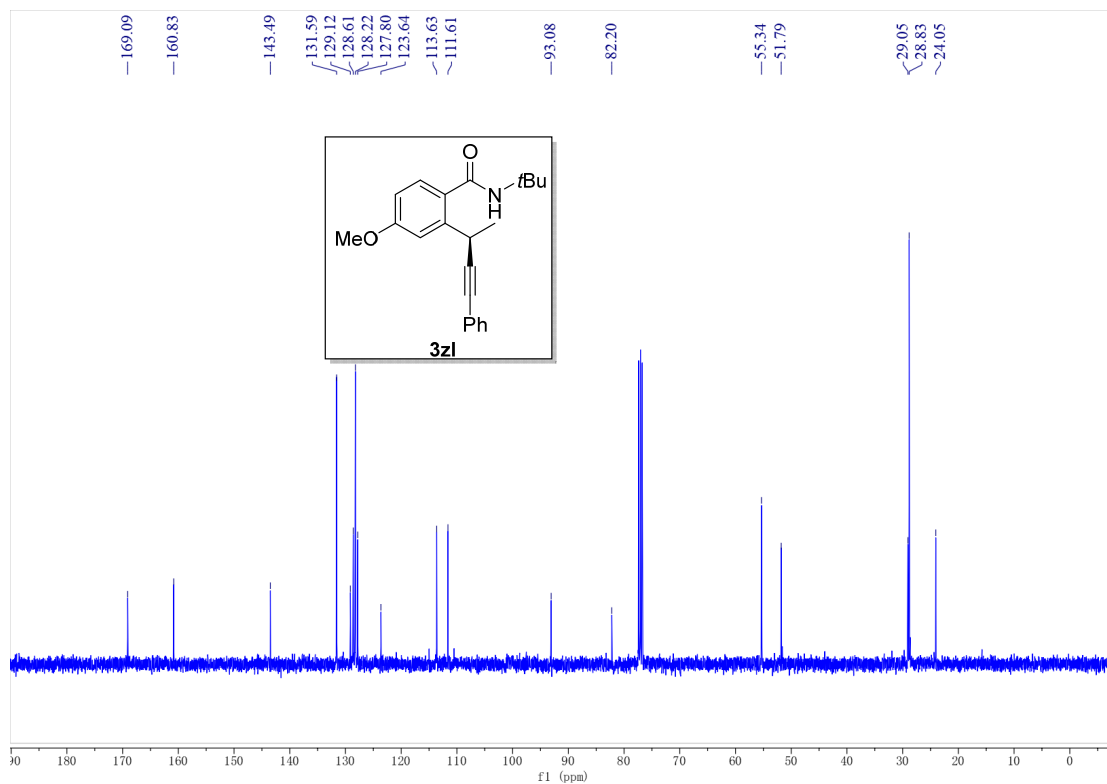

Supplementary Figure 145 <sup>13</sup>C NMR of **3zl**

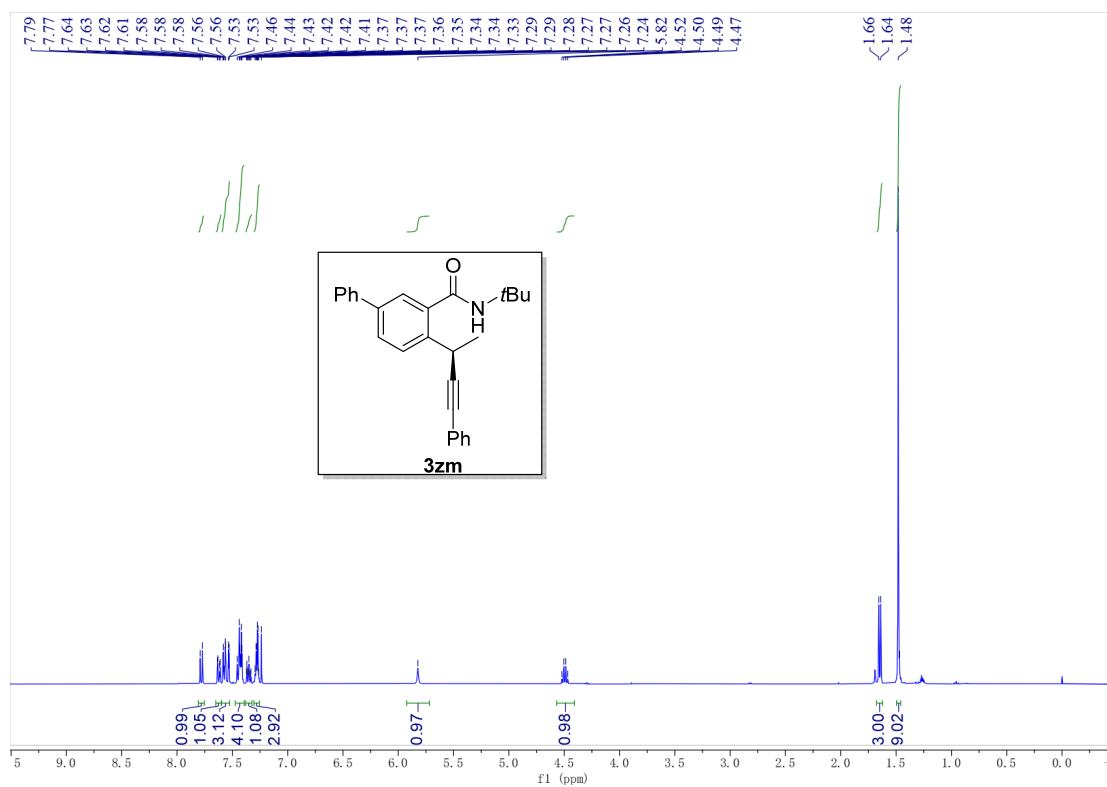

Supplementary Figure 146 <sup>1</sup>H NMR of **3zm**

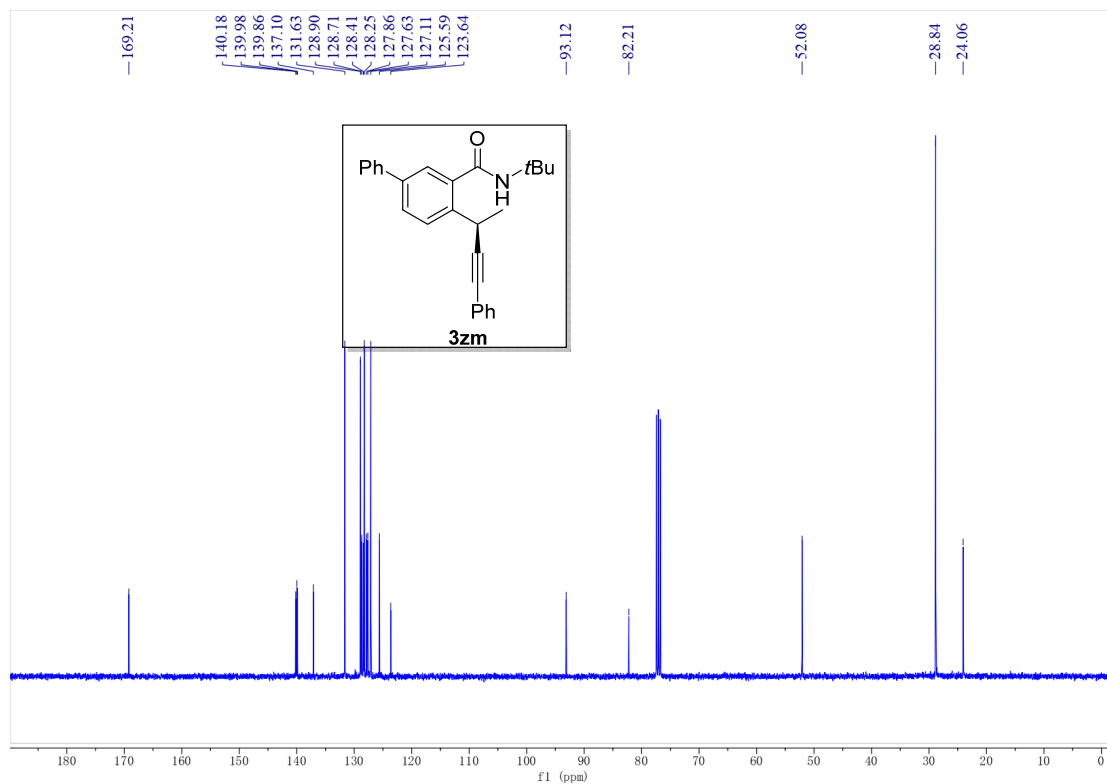

Supplementary Figure 147 <sup>13</sup>C NMR of **3zm**

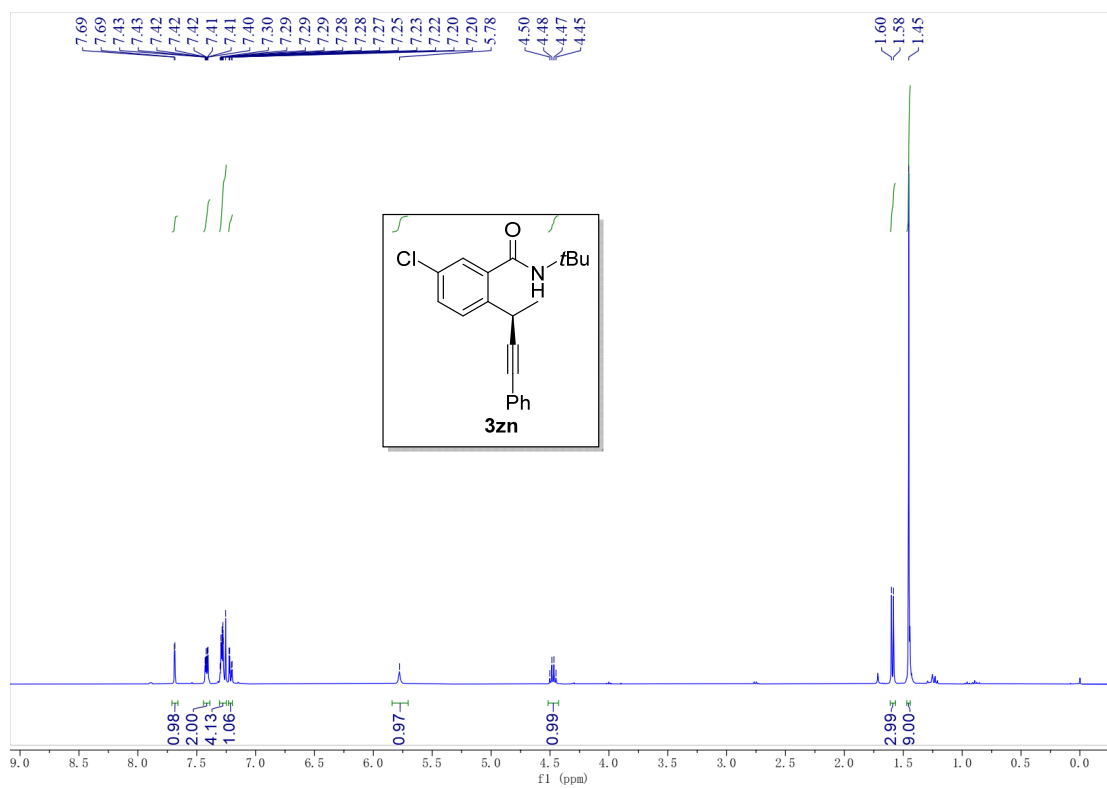

Supplementary Figure 148 <sup>1</sup>H NMR of **3zn**

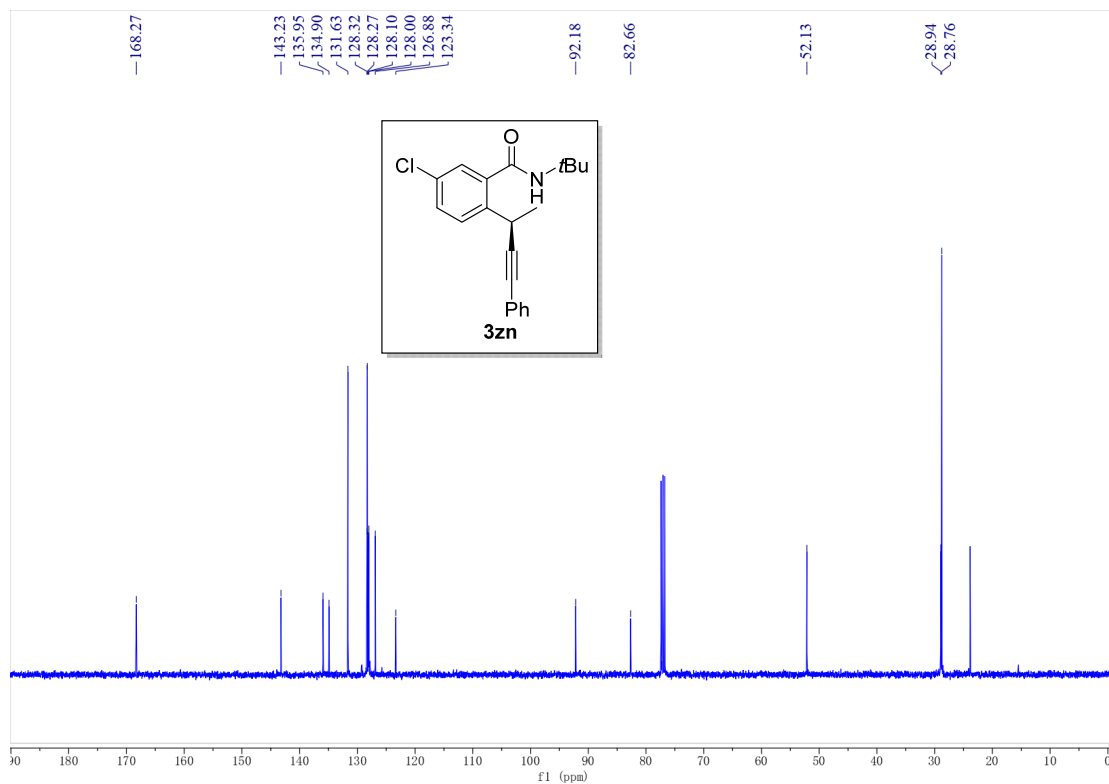

Supplementary Figure 149 <sup>13</sup>C NMR of **3zn**

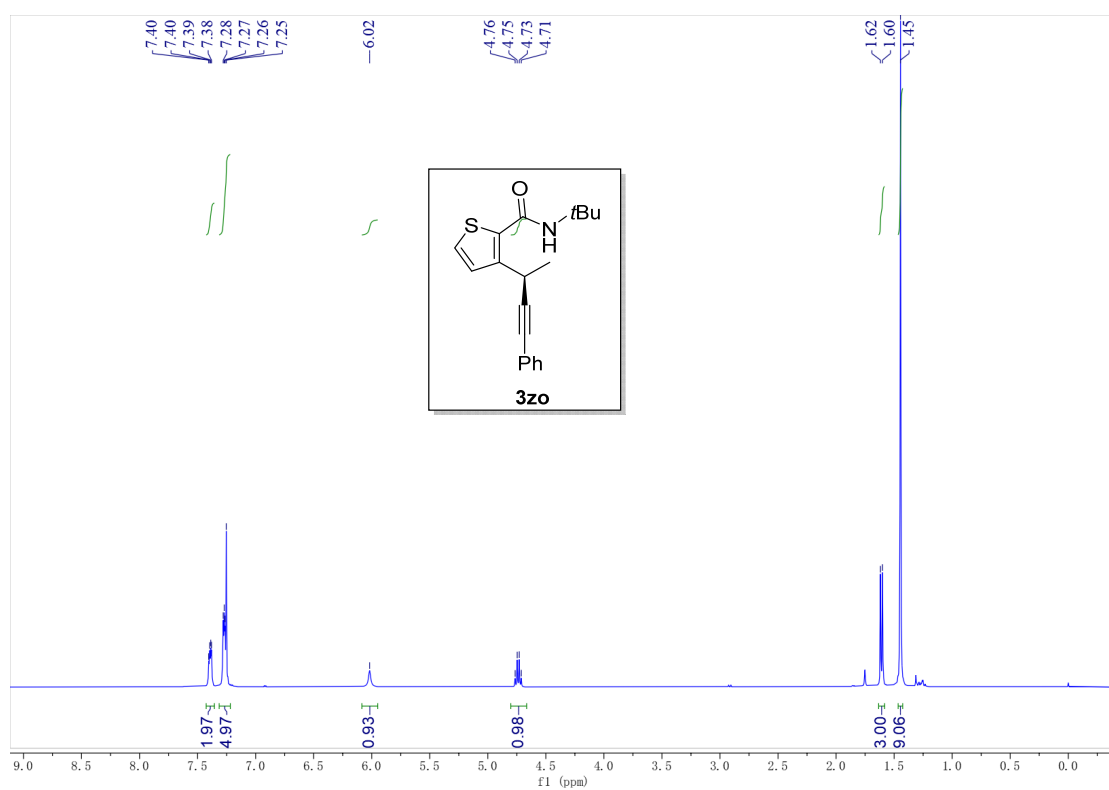

Supplementary Figure 150 <sup>1</sup>H NMR of **3zo**

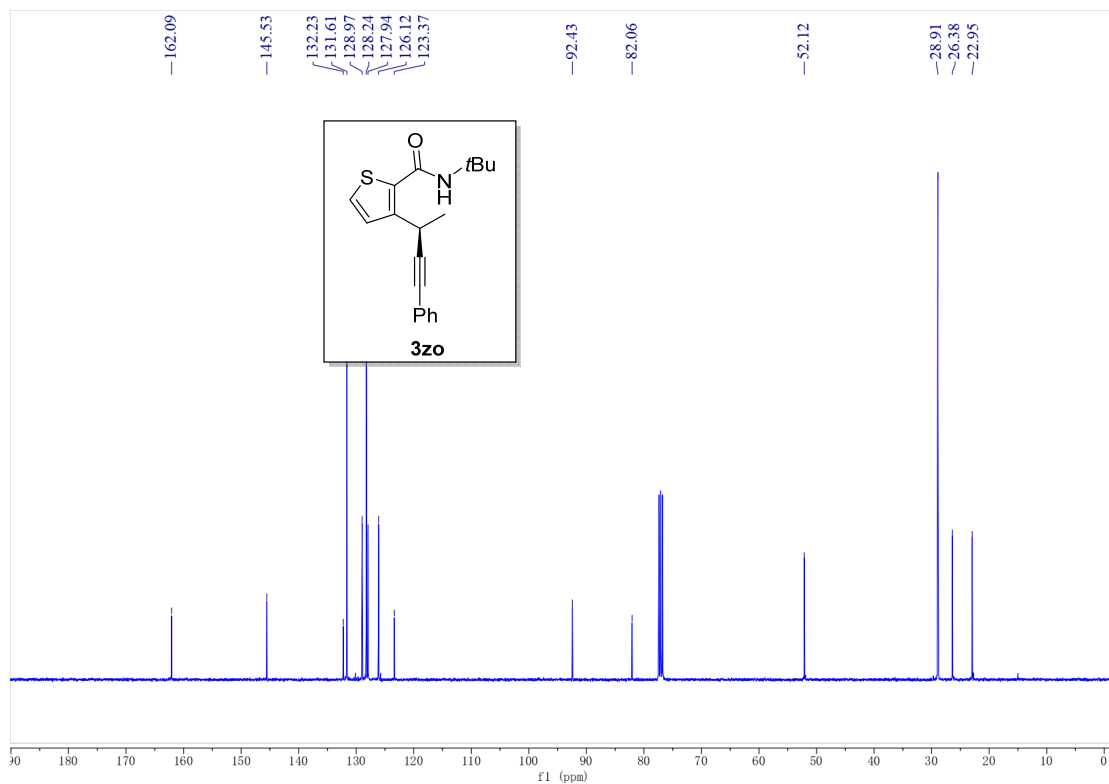

Supplementary Figure 151  $^{13}\text{C}$  NMR of **3zo**

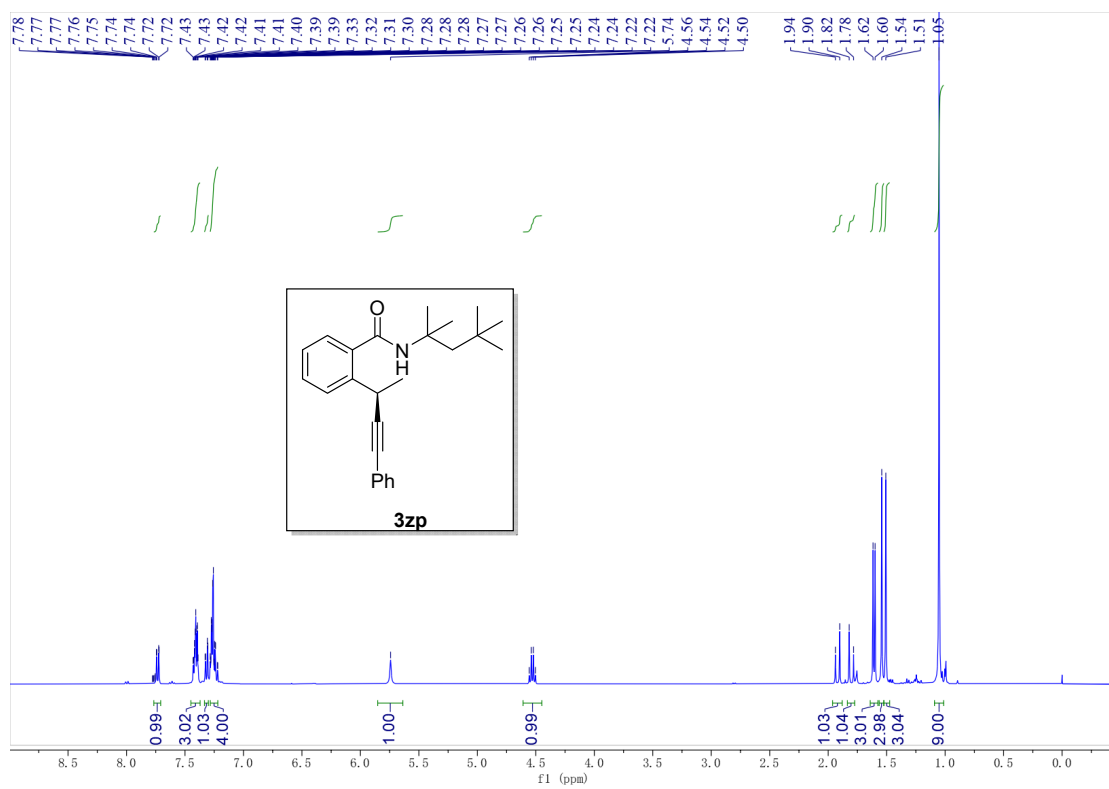

Supplementary Figure 152  $^1\text{H}$  NMR of **3zp**

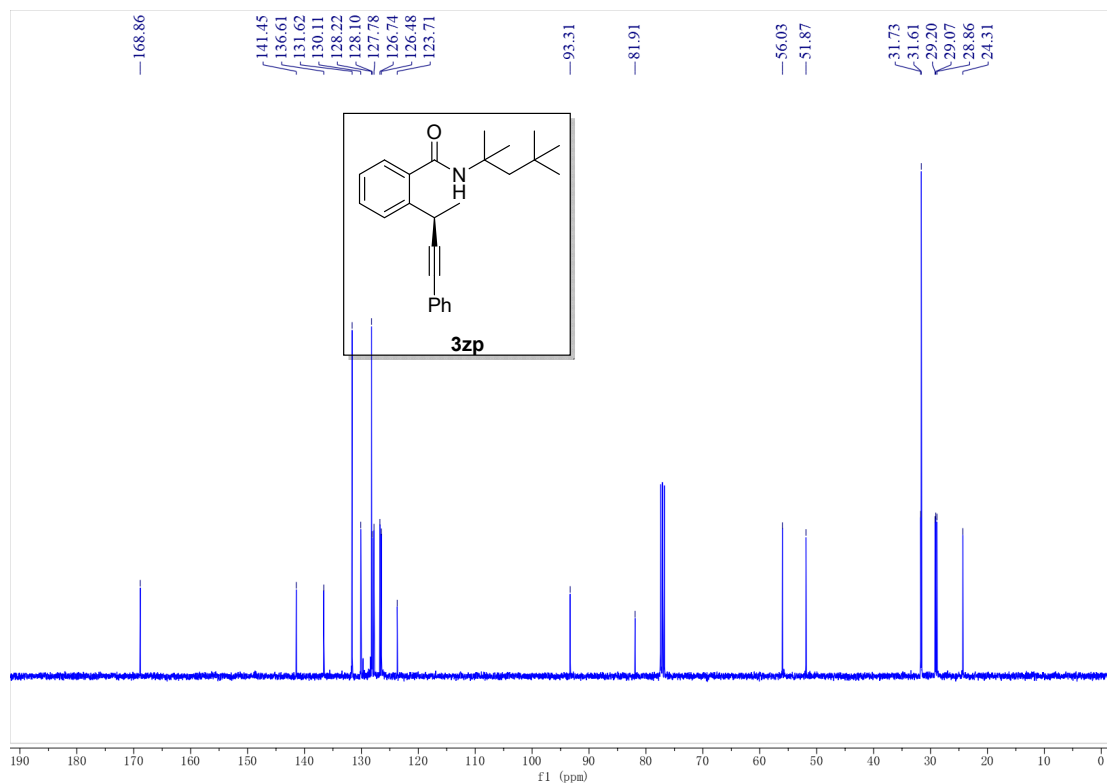

Supplementary Figure 153  $^{13}\text{C}$  NMR of **3zp**

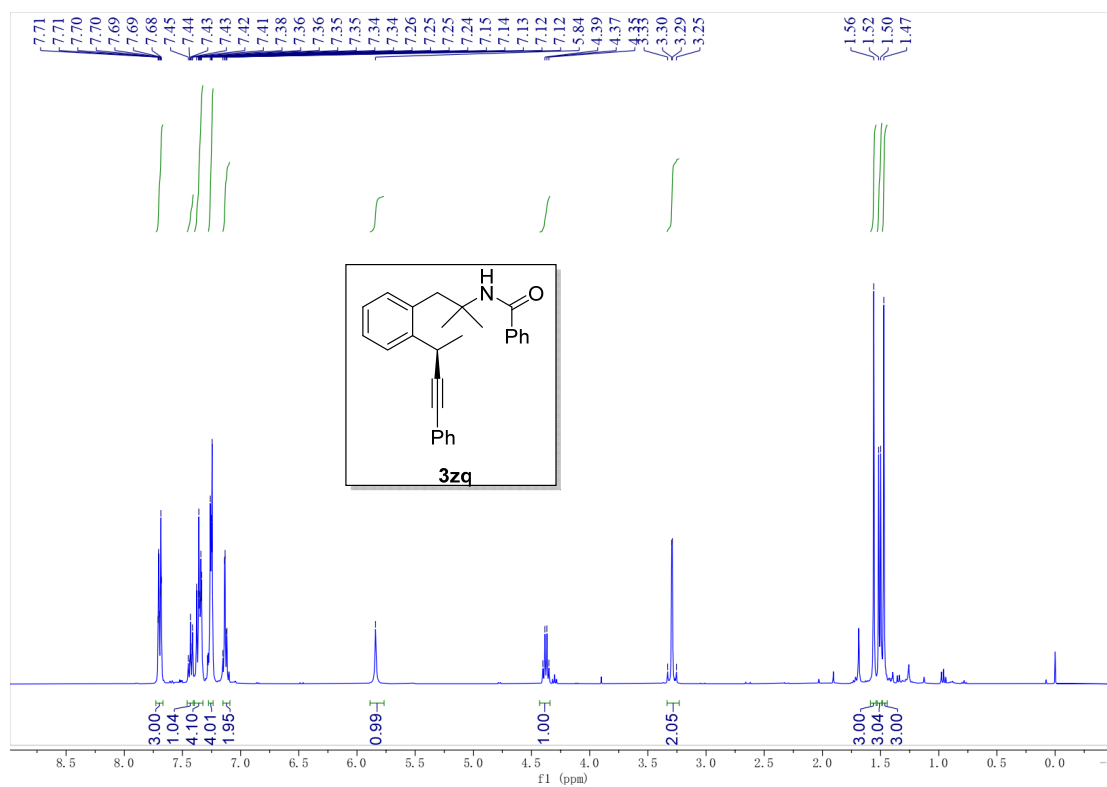

Supplementary Figure 154  $^1\text{H}$  NMR of **3zq**



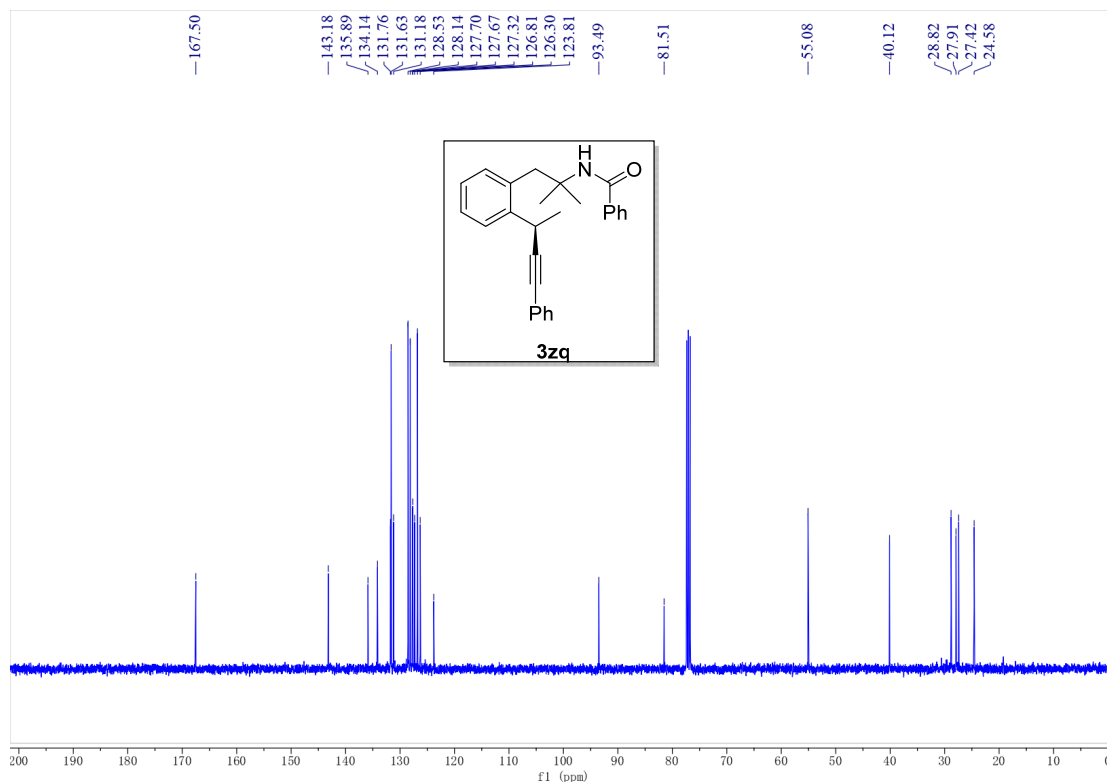

Supplementary Figure 155 <sup>13</sup>C NMR of **3zq**

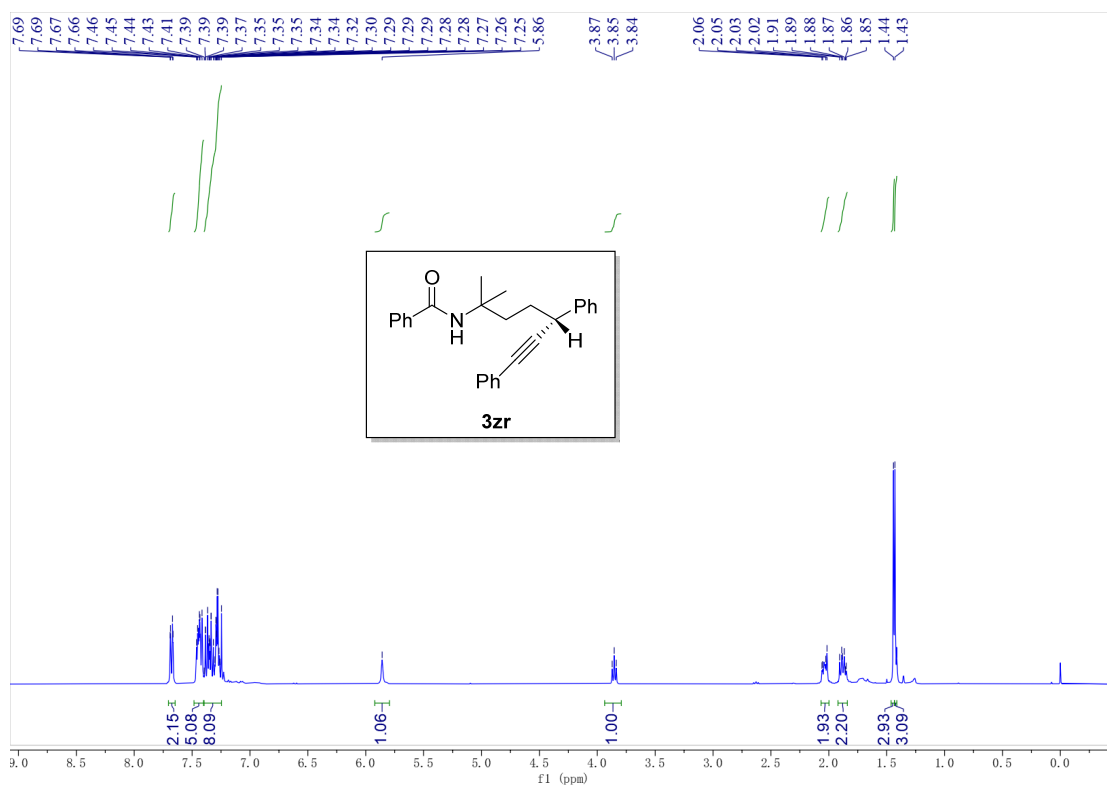

Supplementary Figure 156 <sup>1</sup>H NMR of **3zr**

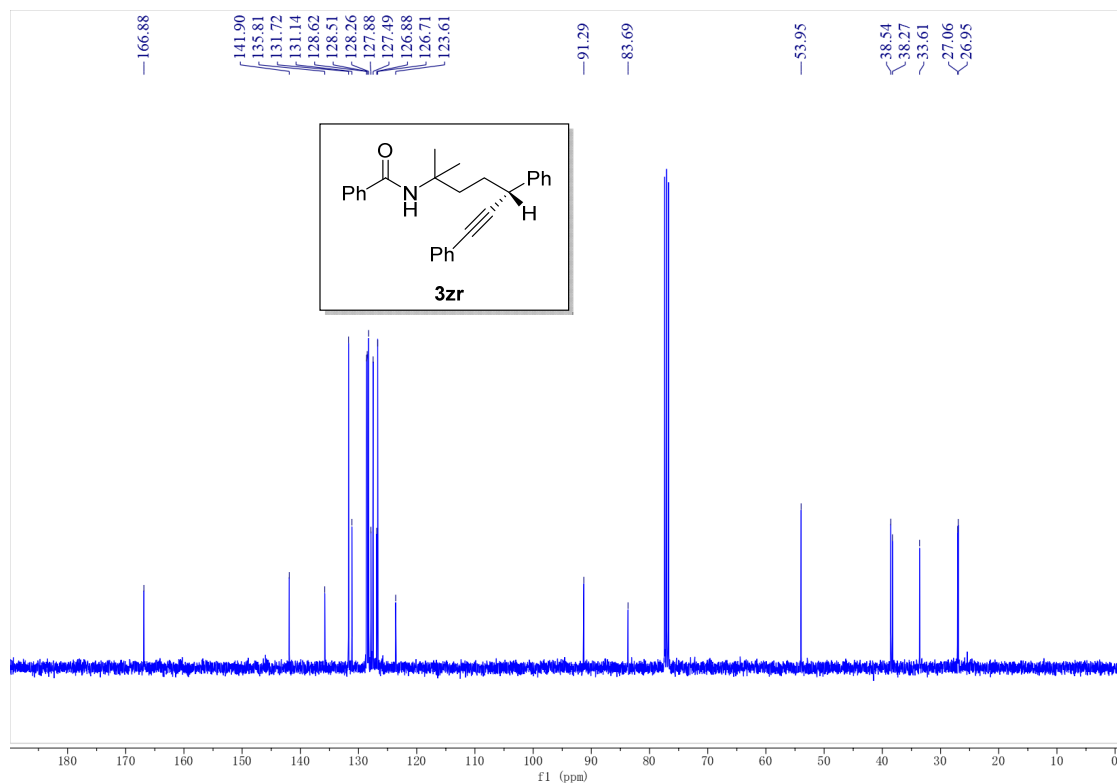

Supplementary Figure 157 <sup>13</sup>C NMR of **3zr**

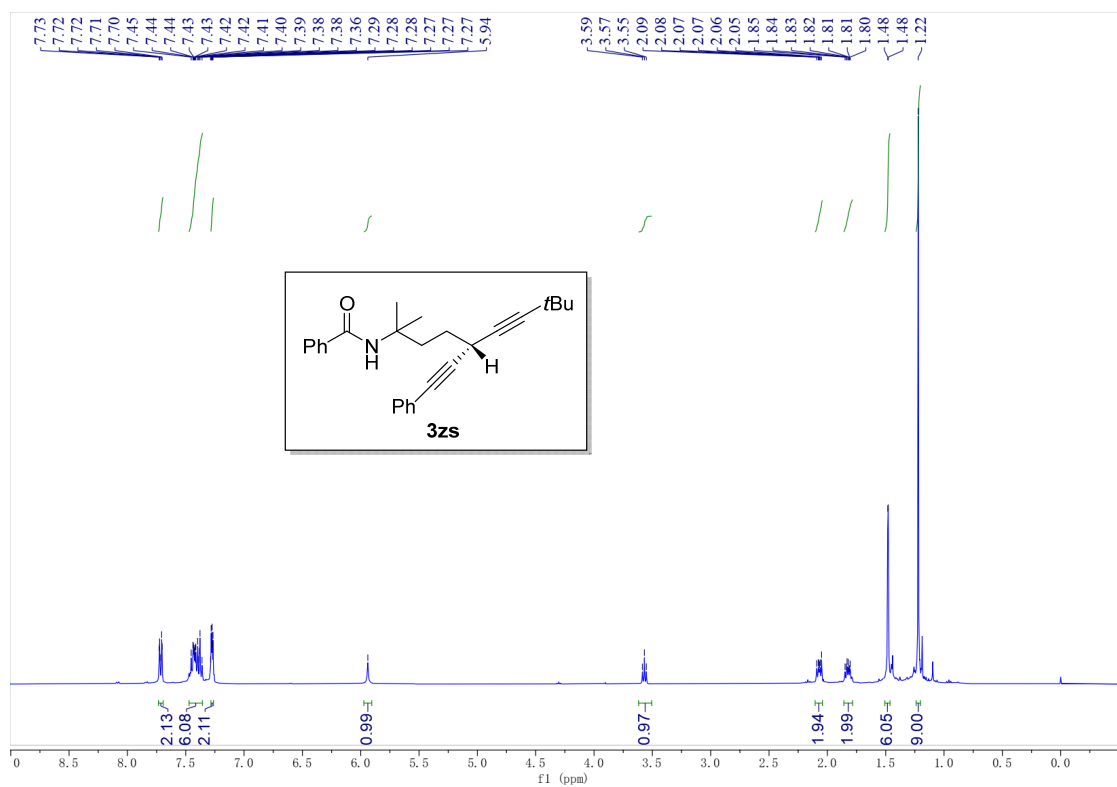

Supplementary Figure 158 <sup>1</sup>H NMR of **3zs**

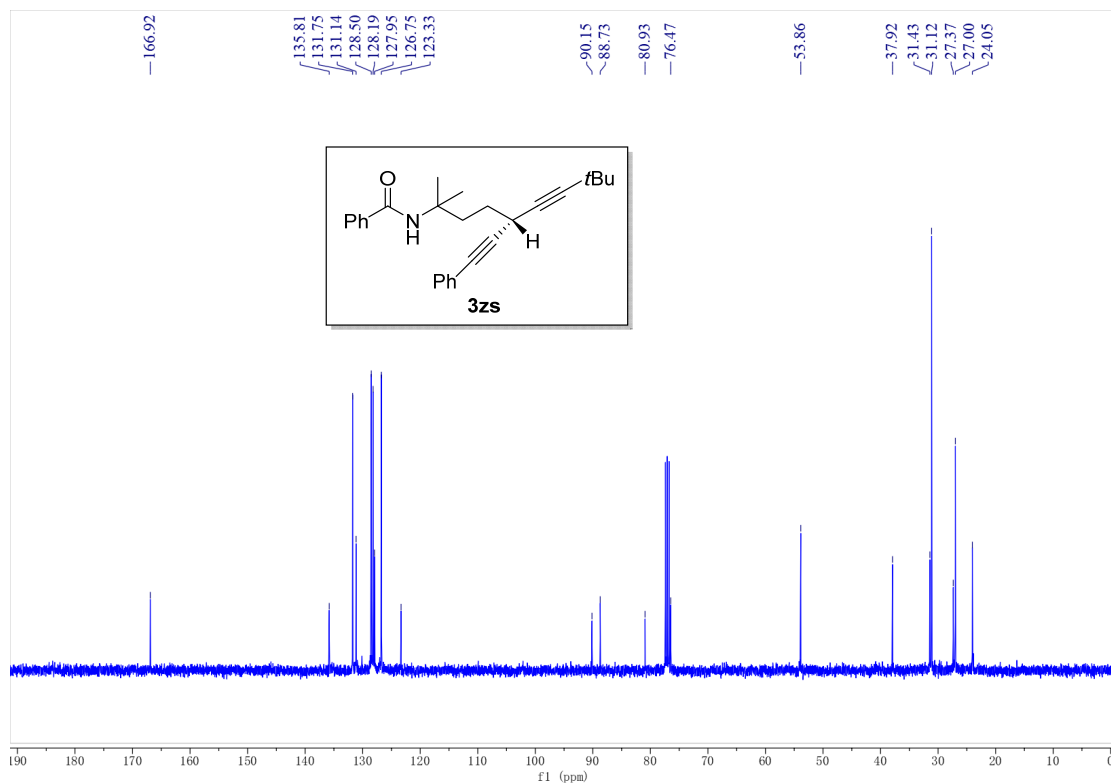

Supplementary Figure 159 <sup>13</sup>C NMR of **3zs**

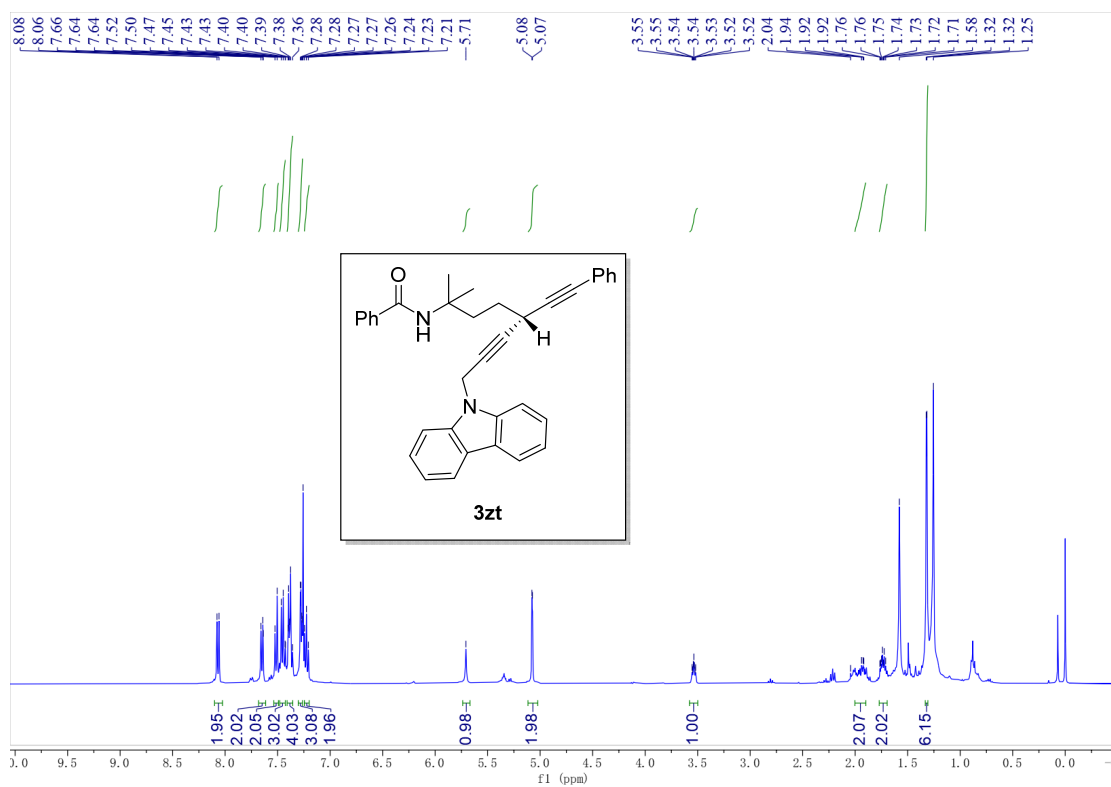

Supplementary Figure 160 <sup>1</sup>H NMR of **3zt**

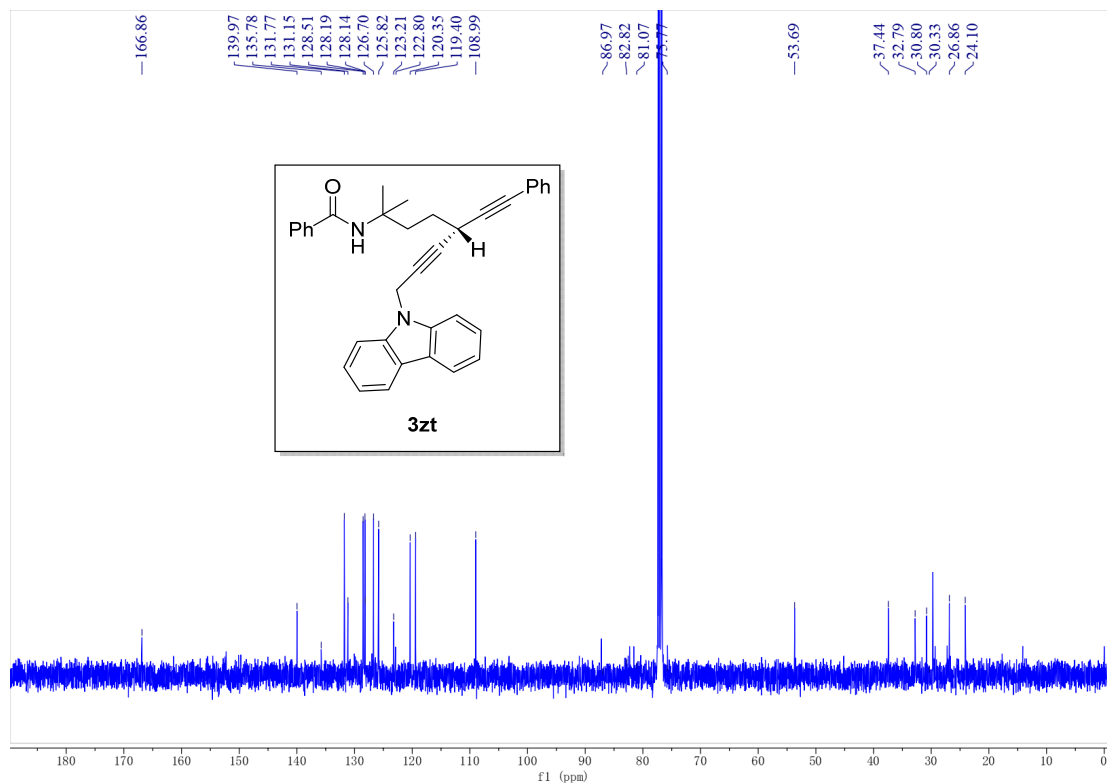

Supplementary Figure 161 <sup>13</sup>C NMR of **3zt**

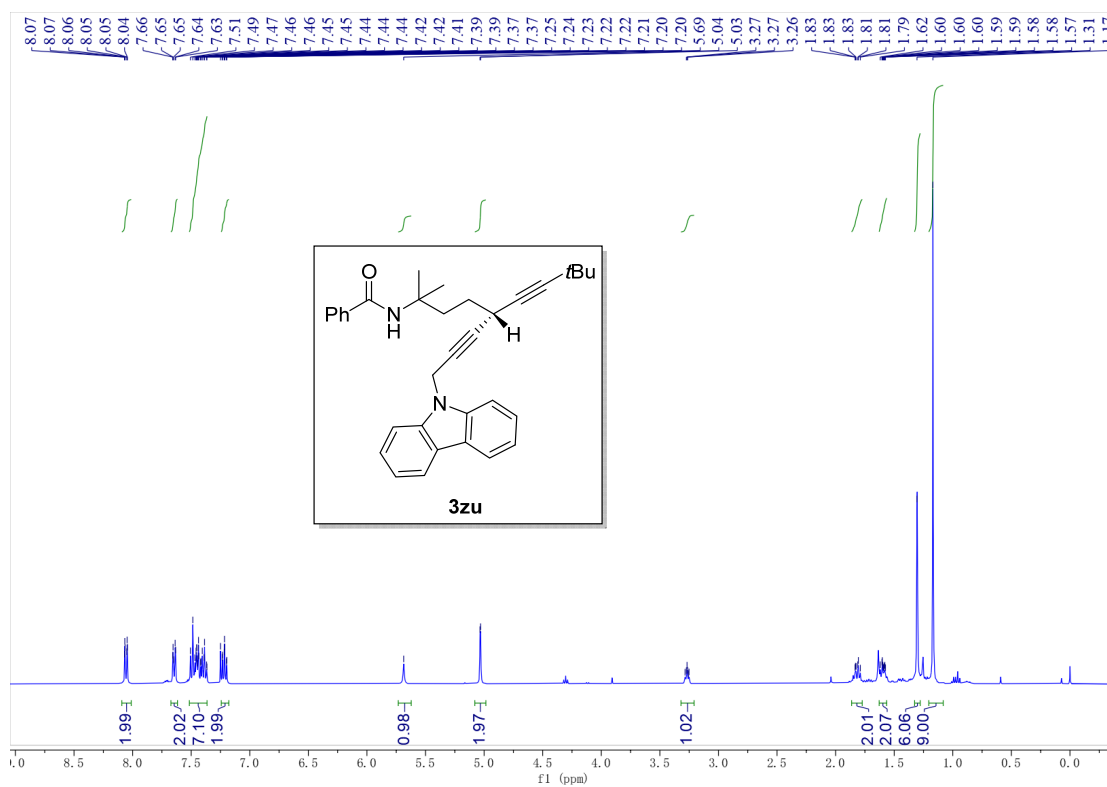

Supplementary Figure 162 <sup>1</sup>H NMR of **3zu**

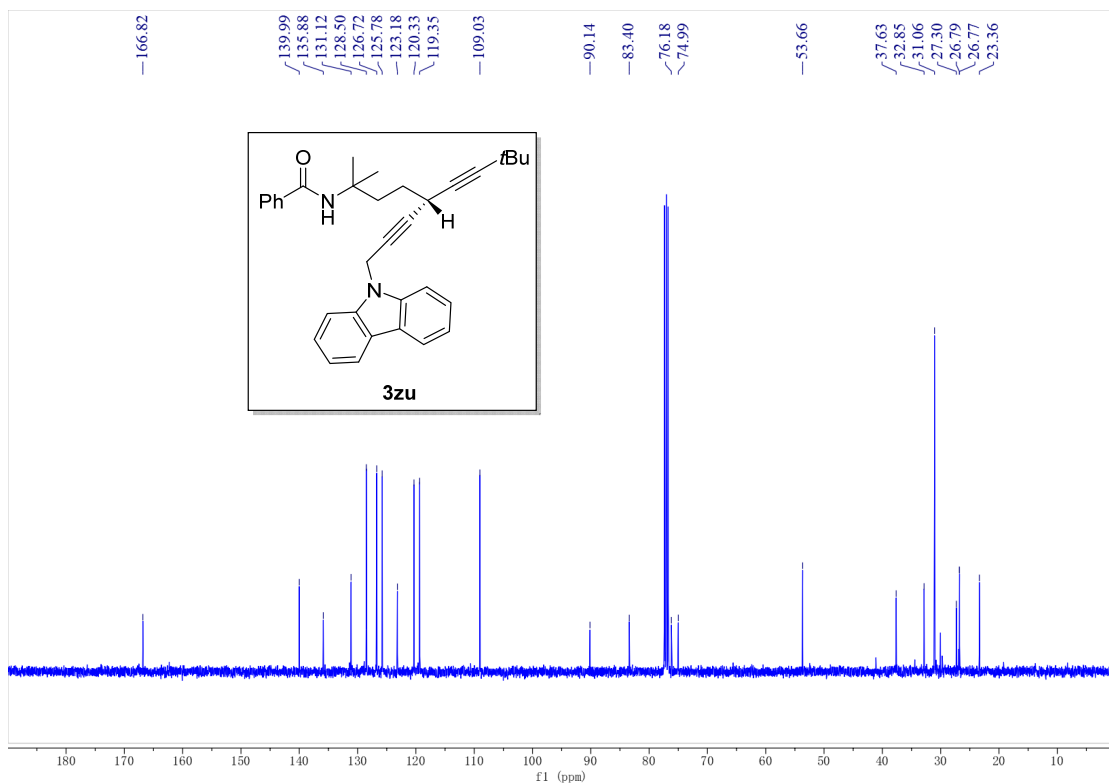

Supplementary Figure 163 <sup>13</sup>C NMR of **3zu**

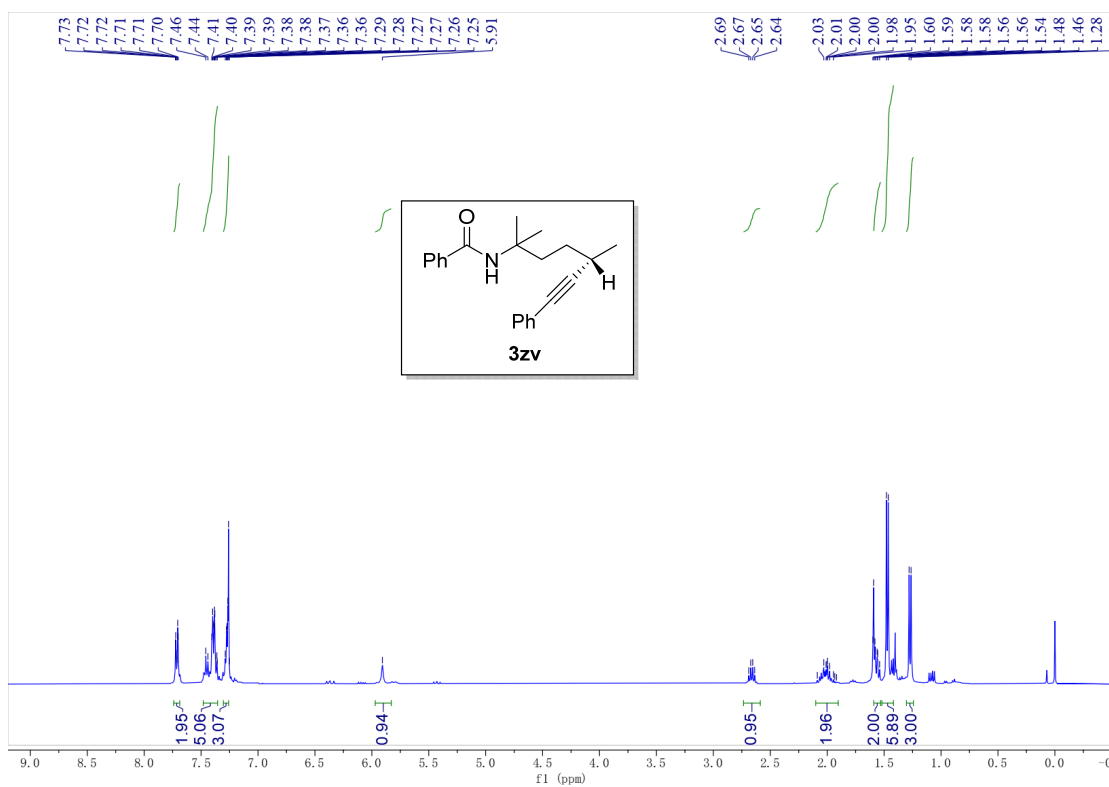

Supplementary Figure 164 <sup>1</sup>H NMR of **3zv**

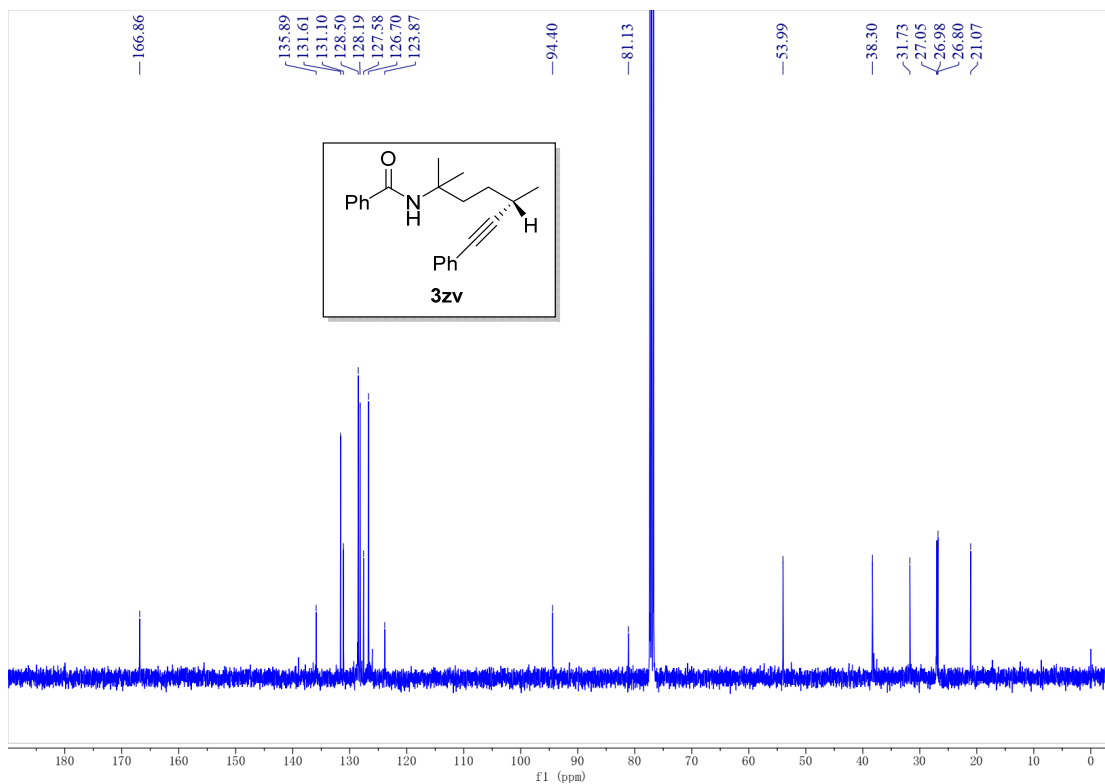

Supplementary Figure 165 <sup>13</sup>C NMR of **3zv**

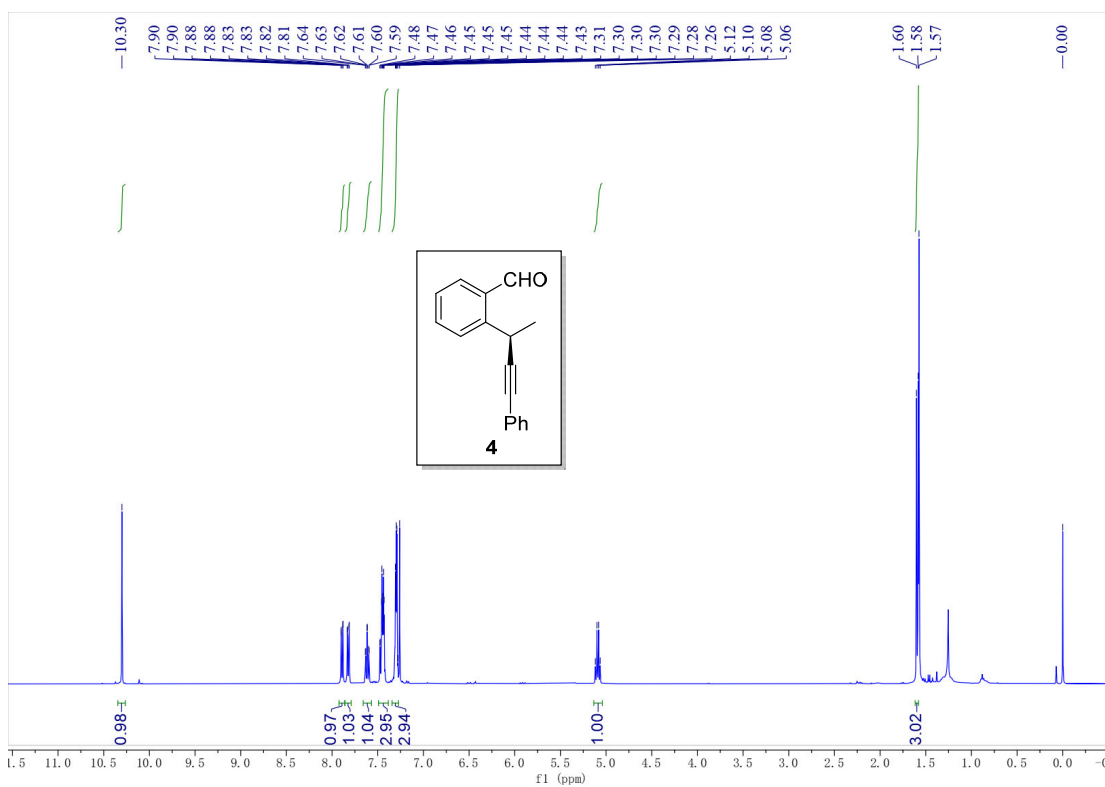

Supplementary Figure 166 <sup>1</sup>H NMR of **4**

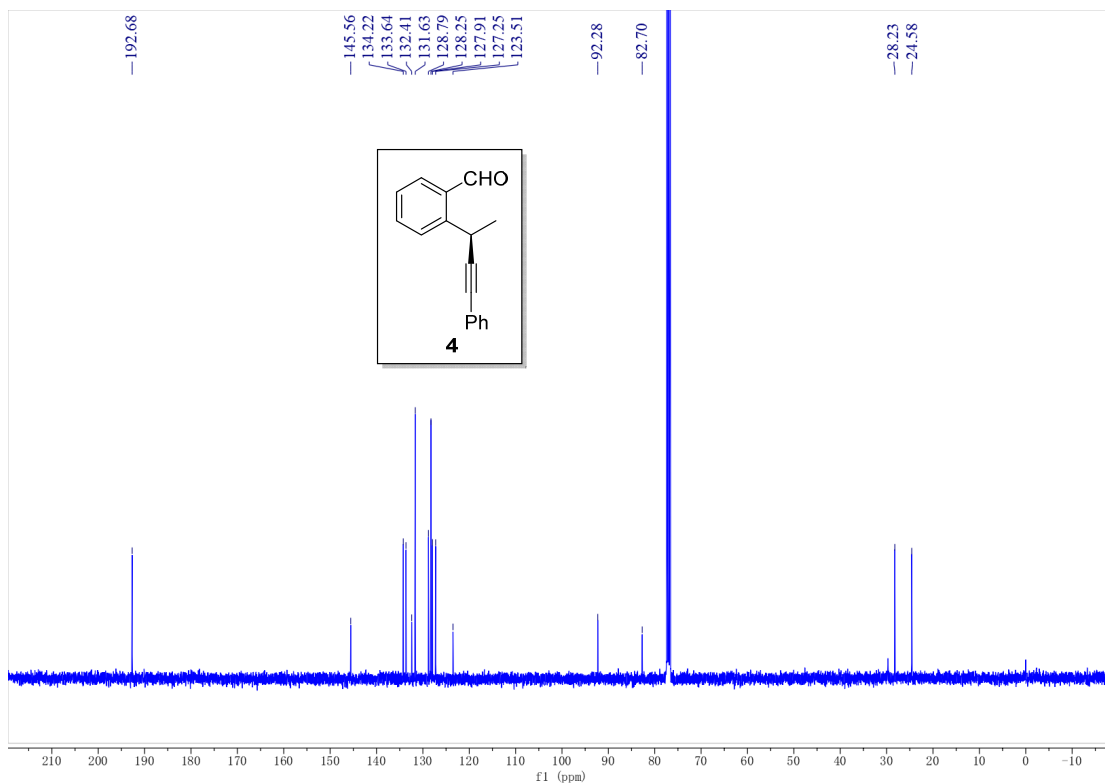

Supplementary Figure 167  $^{13}\text{C}$  NMR of 4

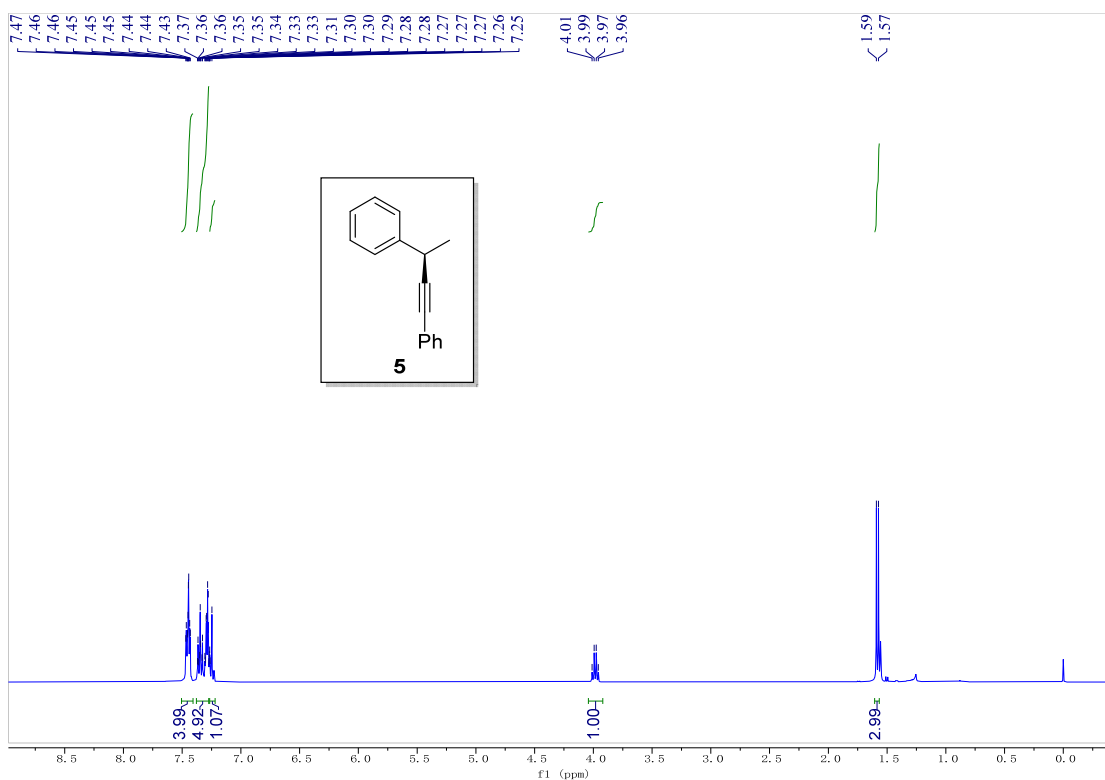

Supplementary Figure 168  $^1\text{H}$  NMR of 5

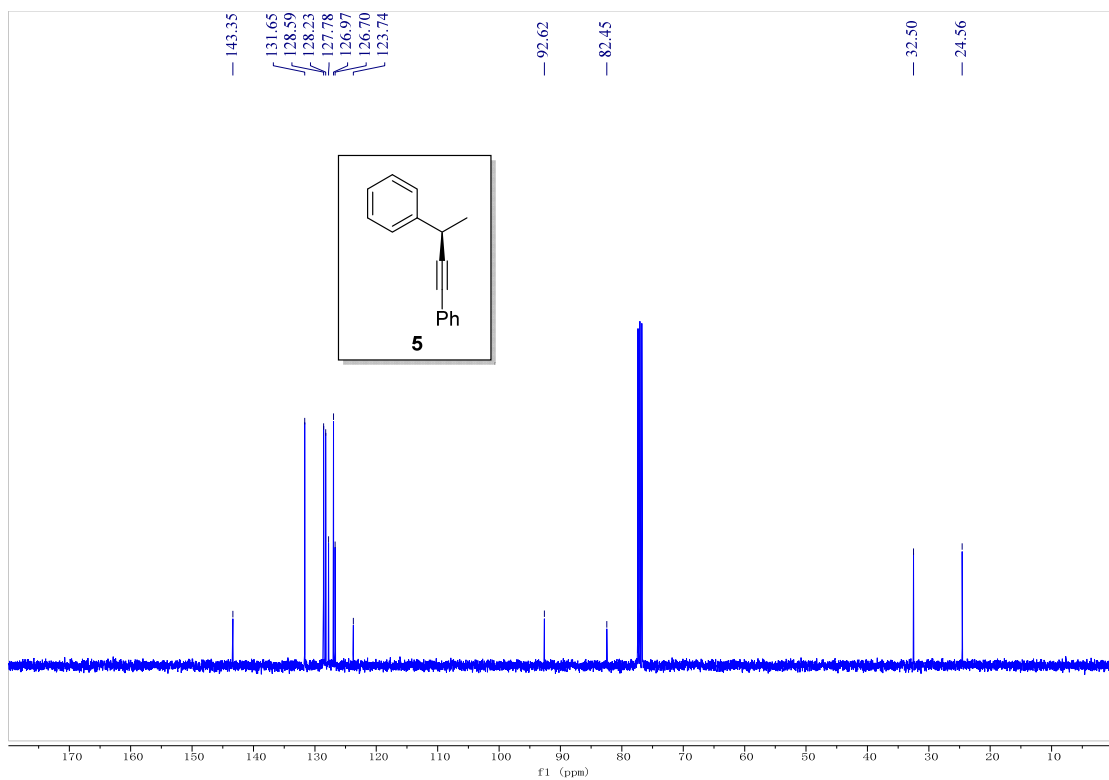

Supplementary Figure 169  $^{13}\text{C}$  NMR of **5**

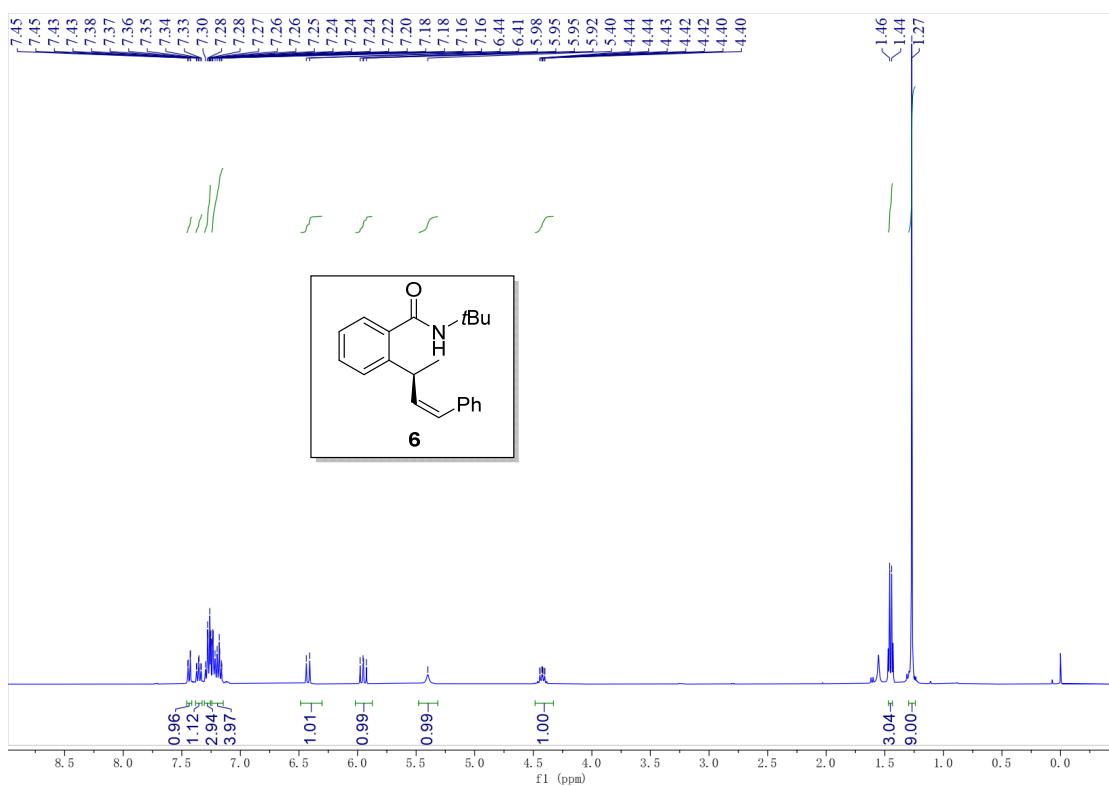

Supplementary Figure 170  $^1\text{H}$  NMR of **6**



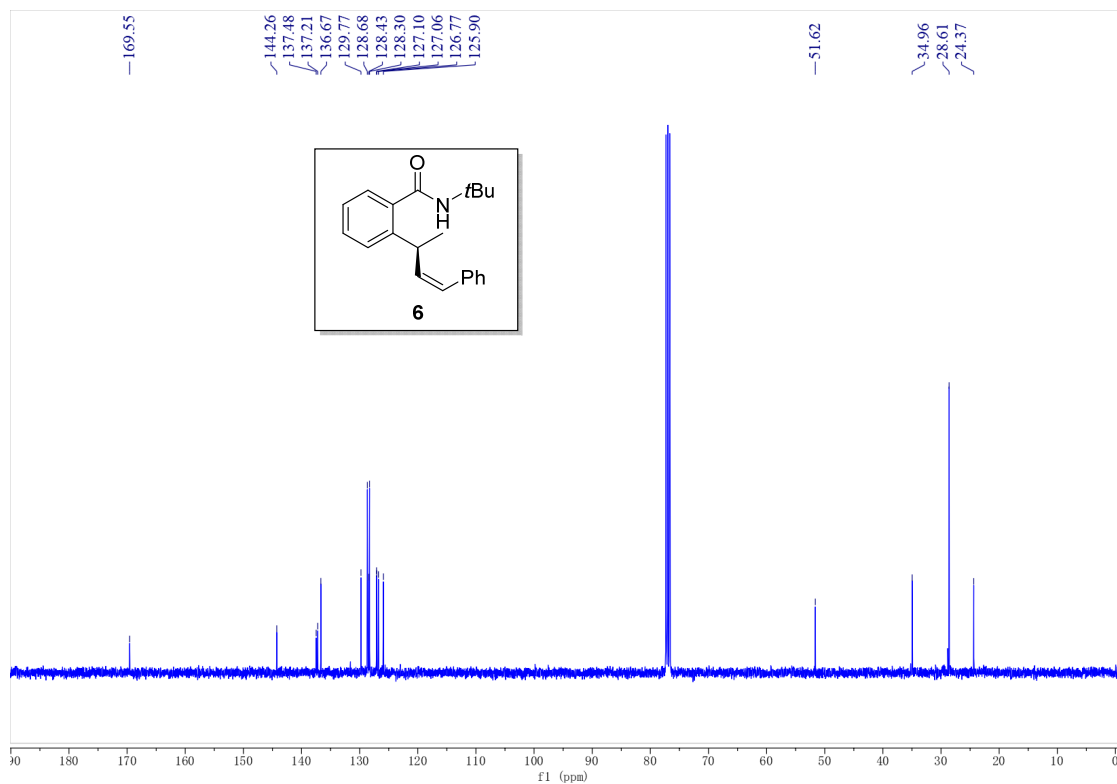

Supplementary Figure 171 <sup>13</sup>C NMR of 6

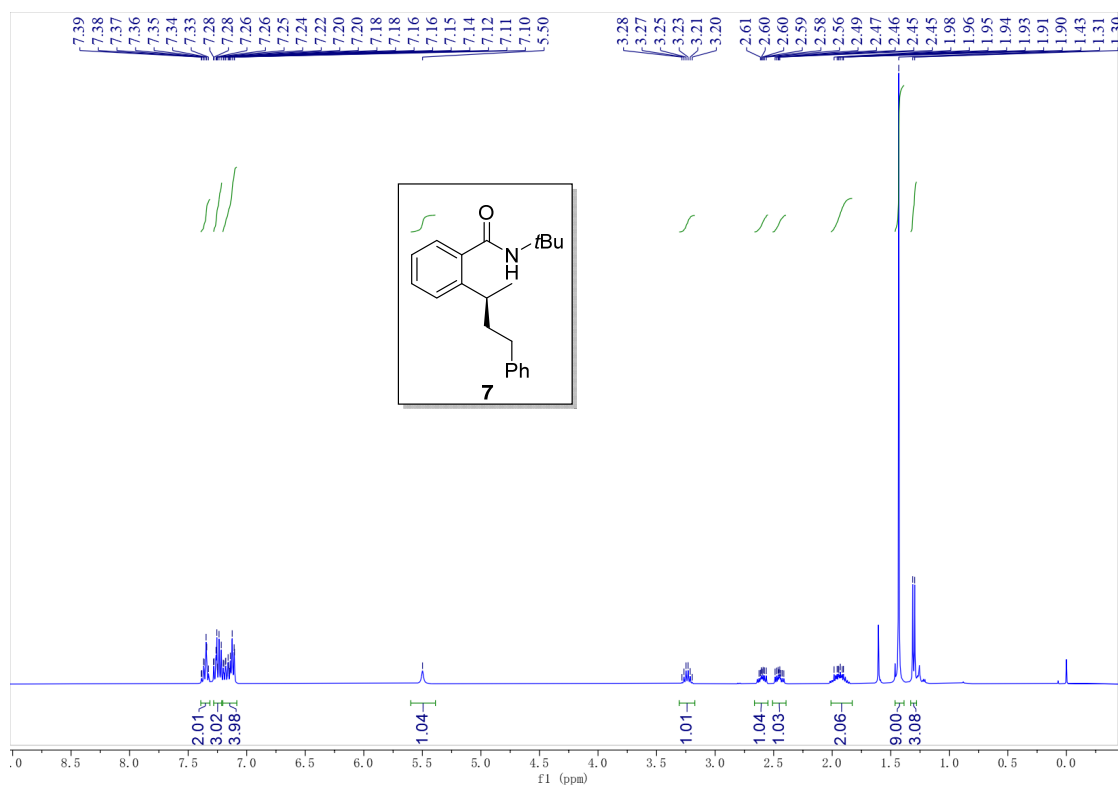

Supplementary Figure 172 <sup>1</sup>H NMR of 7

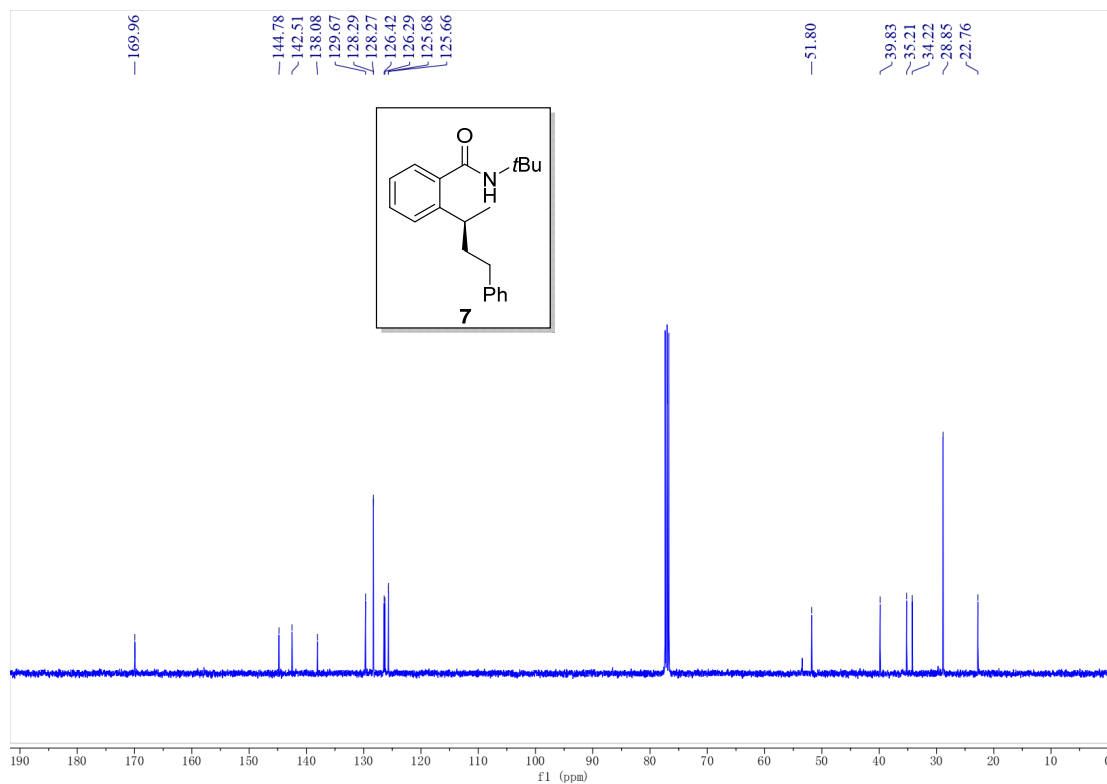

Supplementary Figure 173 <sup>13</sup>C NMR of **7**

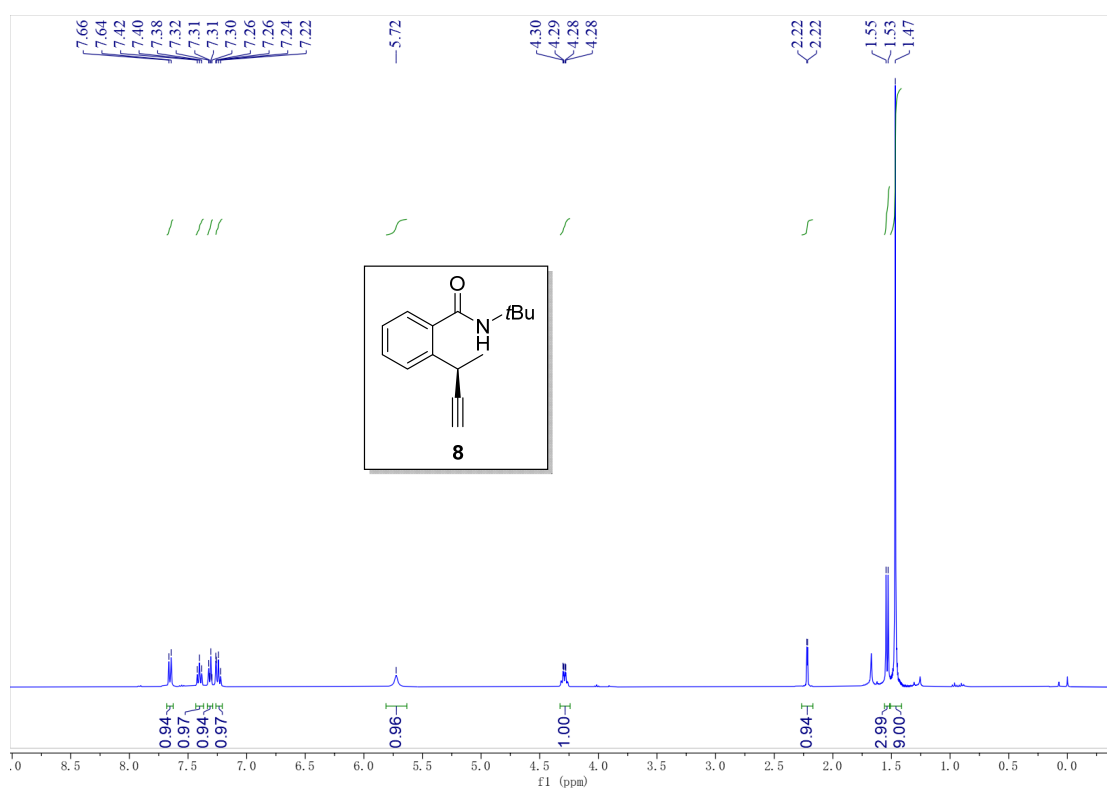

Supplementary Figure 174 <sup>1</sup>H NMR of **8**

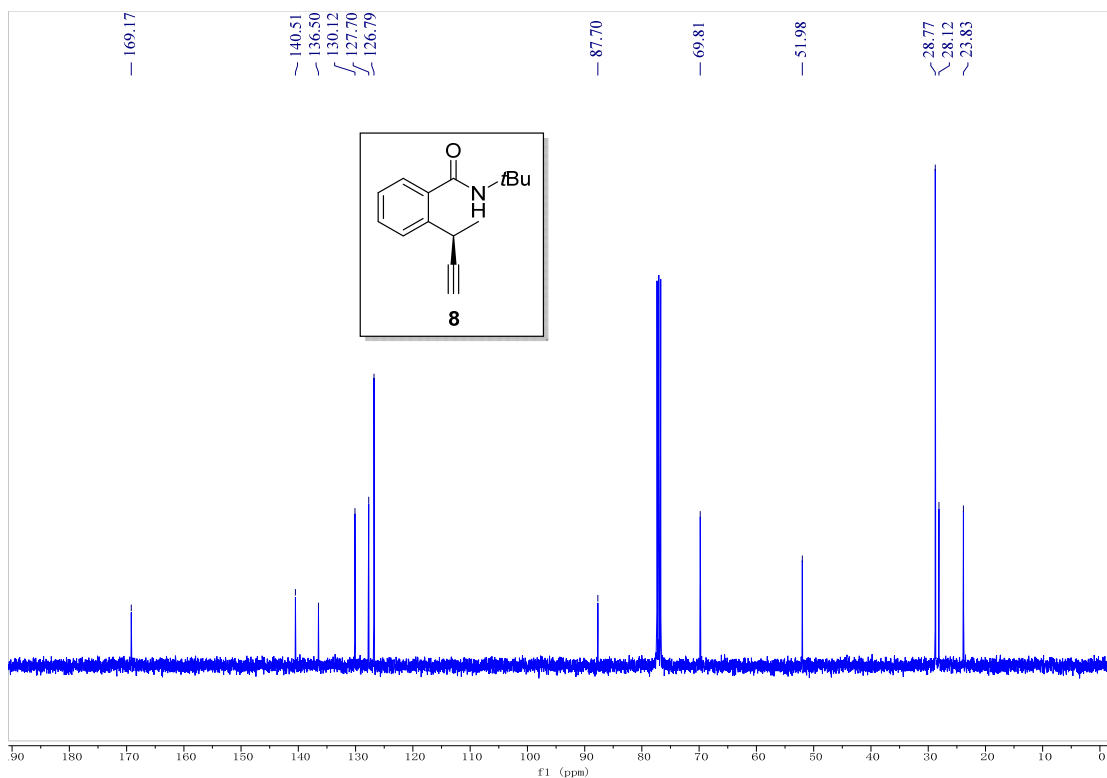

Supplementary Figure 175  $^{13}\text{C}$  NMR of **8**

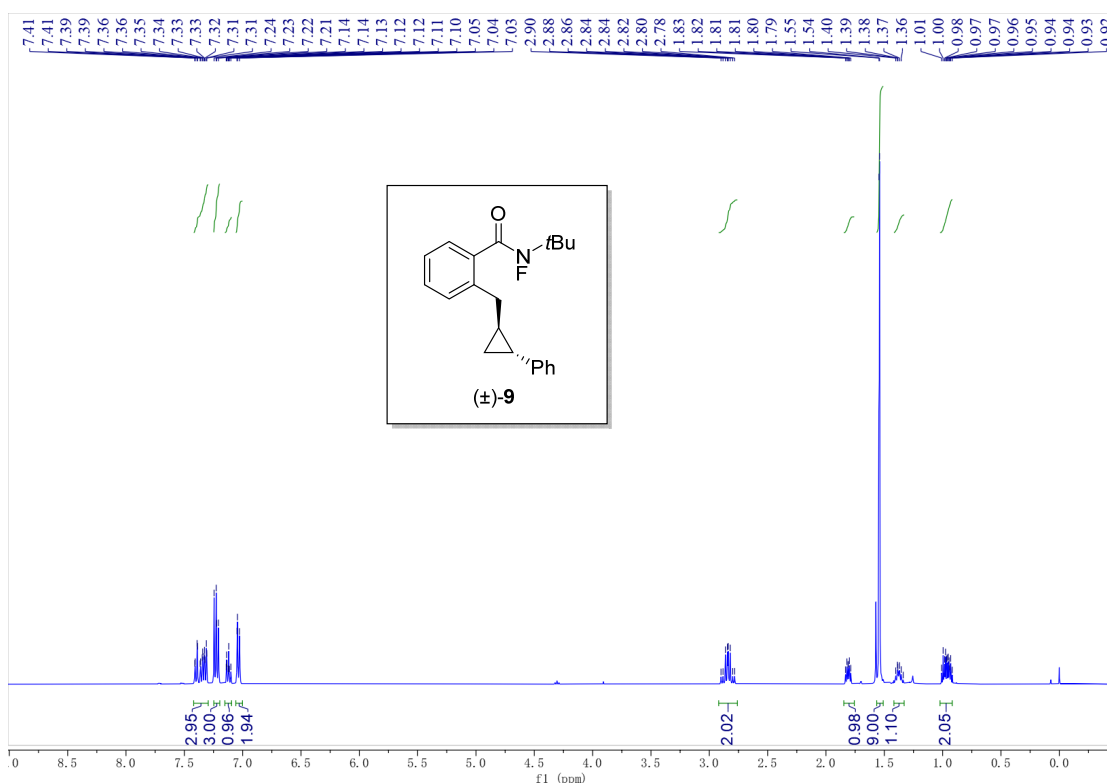

Supplementary Figure 176  $^1\text{H}$  NMR of **9**

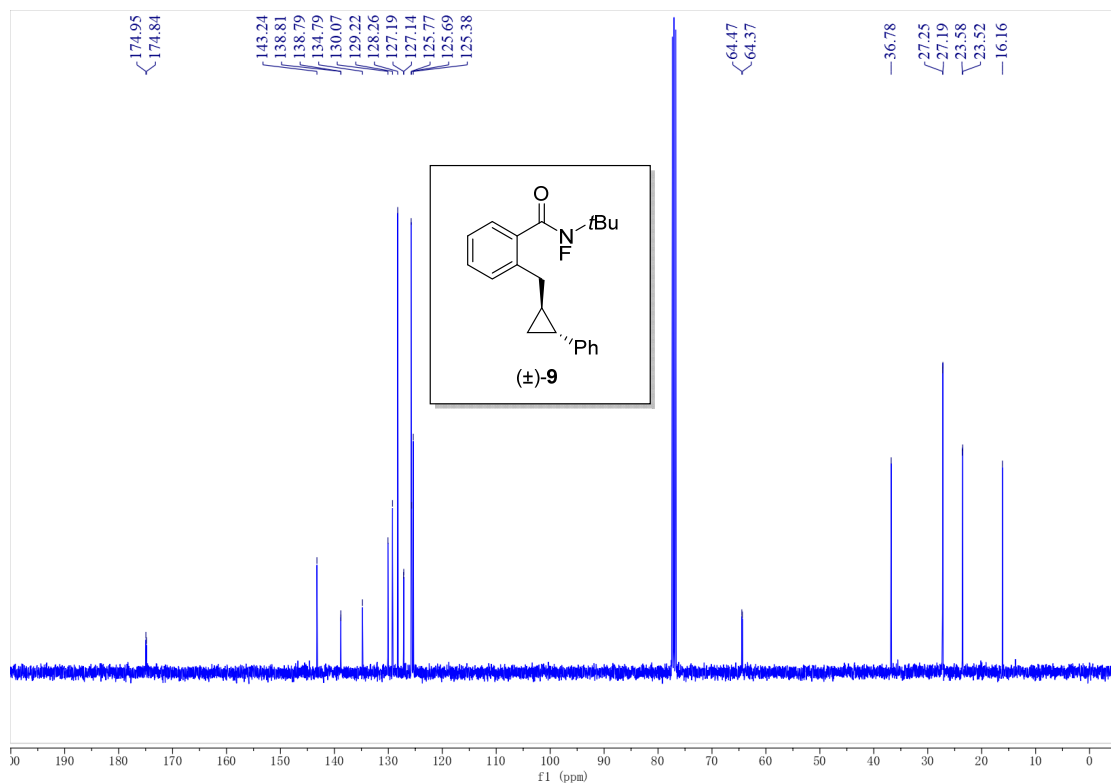

Supplementary Figure 177  $^{13}\text{C}$  NMR of **9**

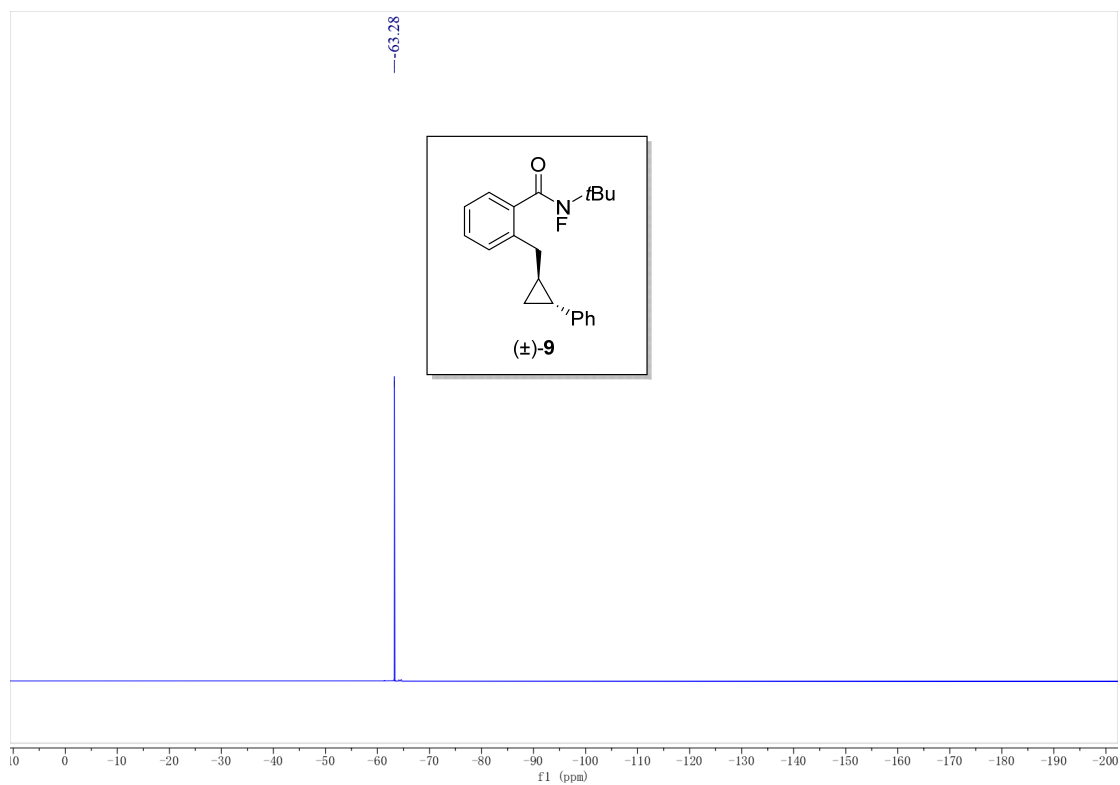

Supplementary Figure 178  $^{19}\text{F}$  NMR of **9**

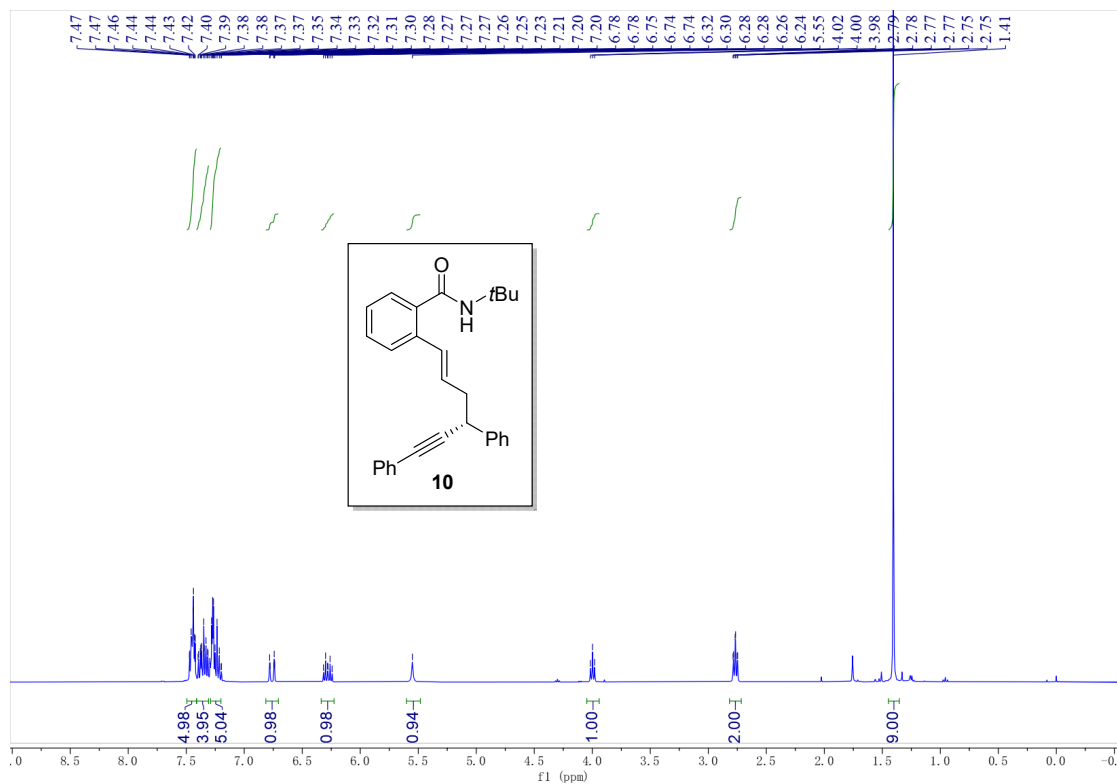

Supplementary Figure 179  $^1\text{H}$  NMR of **10**

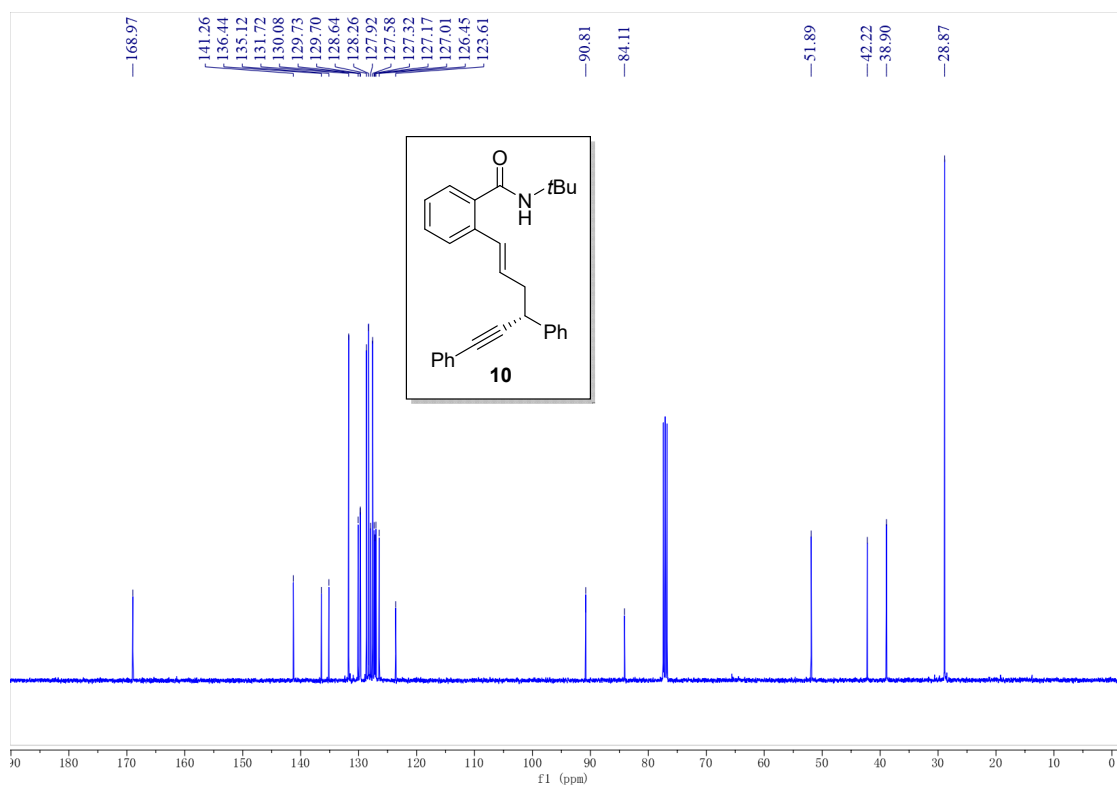

Supplementary Figure 180  $^{13}\text{C}$  NMR of **10**

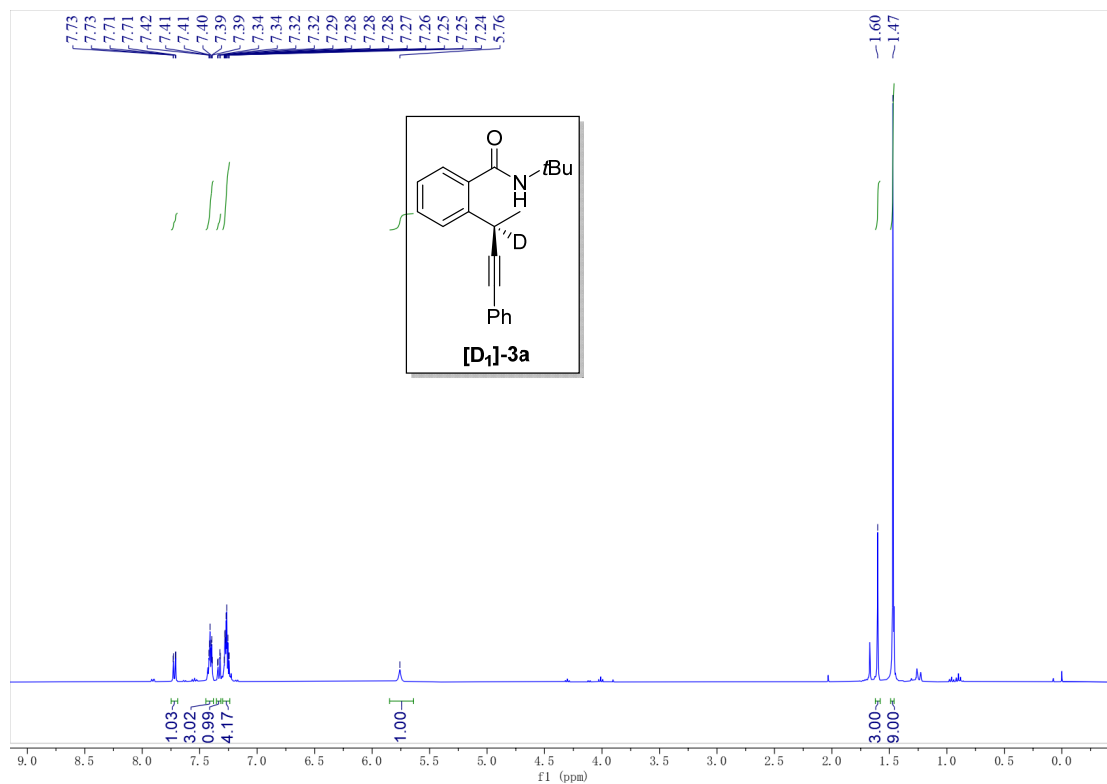

Supplementary Figure 181 <sup>1</sup>H NMR of [D<sub>1</sub>]-3a

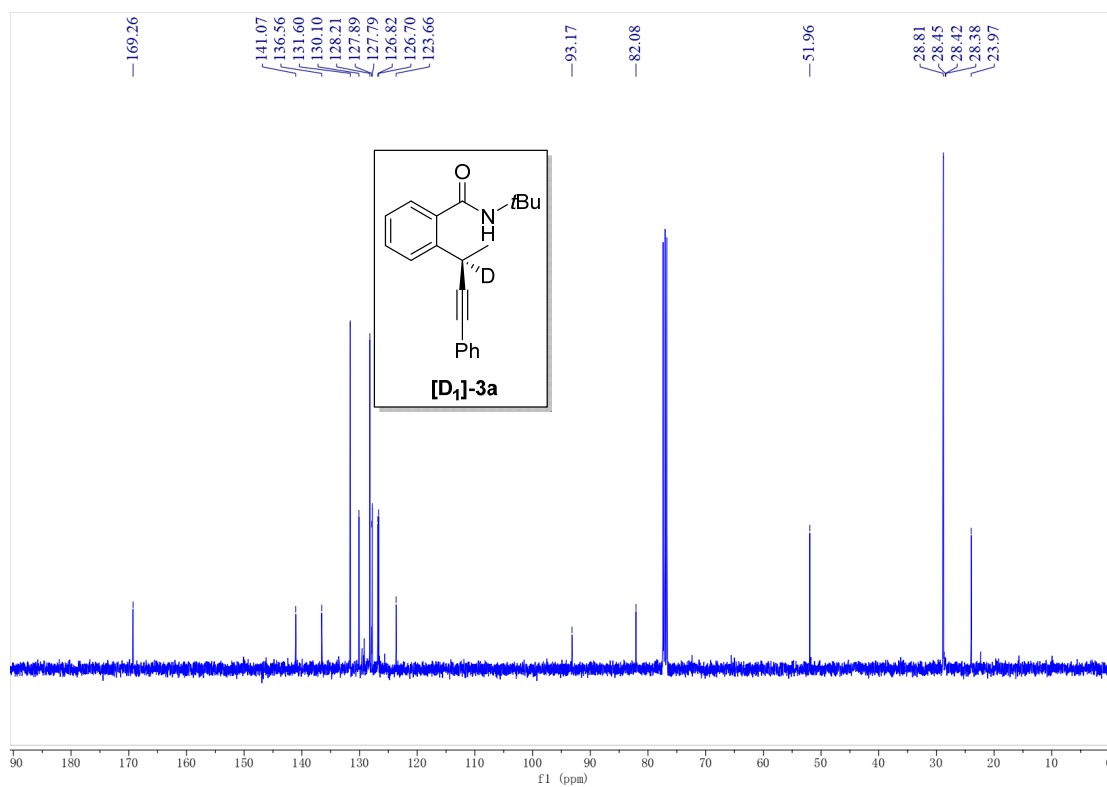

Supplementary Figure 182 <sup>13</sup>C NMR of [D<sub>1</sub>]-3a

DAD1 A, Sig=254,4 Ref=360,100 (D:\DATA\ZZ...44-45-ASY-AD-H-90-10-08 2019-06-22 22-14-46\ZZH-2-25-RAC2.D)

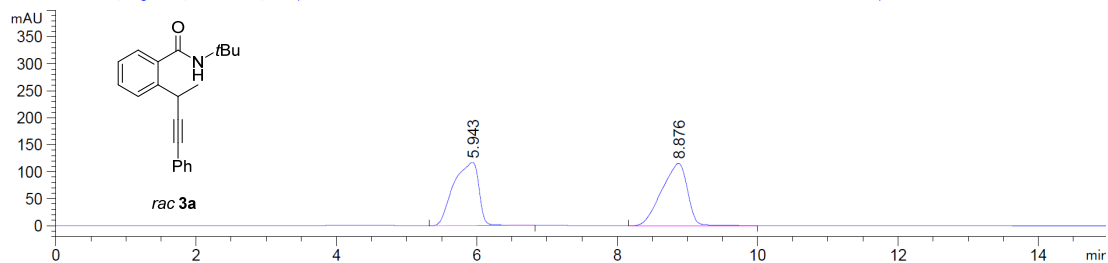

Signal 1: DAD1 A, Sig=254,4 Ref=360,100

| Peak # | RetTime [min] | Type | Width [min] | Area [mAU*s] | Height [mAU] | Area %  |
|--------|---------------|------|-------------|--------------|--------------|---------|
| 1      | 5.943         | BB   | 0.3358      | 2910.34253   | 117.15815    | 49.9144 |
| 2      | 8.876         | BB   | 0.4213      | 2920.32690   | 115.36427    | 50.0856 |

Totals : 5830.66943 232.52242

DAD1 A, Sig=254,4 Ref=360,100 (D:\DATA\ZZ...44-45-ASY-AD-H-90-10-08 2019-06-22 22-14-46\ZZH-2-88-1-ASY.D)

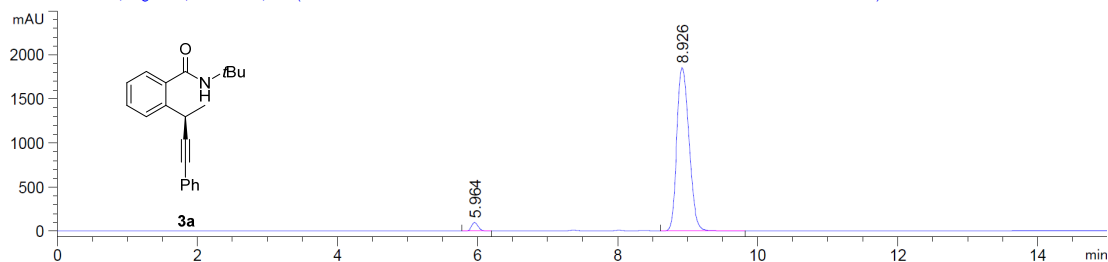

Signal 1: DAD1 A, Sig=254,4 Ref=360,100

| Peak # | RetTime [min] | Type | Width [min] | Area [mAU*s] | Height [mAU] | Area %  |
|--------|---------------|------|-------------|--------------|--------------|---------|
| 1      | 5.964         | VV   | 0.1071      | 681.42169    | 98.03461     | 2.9346  |
| 2      | 8.926         | BV   | 0.1919      | 2.25392e4    | 1852.80945   | 97.0654 |

Totals : 2.32206e4 1950.84406

**Supplementary Figure 183 HPLC spectra for racemic and chiral 3a. HPLC analysis:**  
**Chiralcel AD-H (n-hexane/i-PrOH = 90/10, flow rate 0.8 mL/min,  $\lambda = 254$  nm), tR (minor)**  
**= 5.96 min, tR (major) = 8.93 min, 94% ee.**

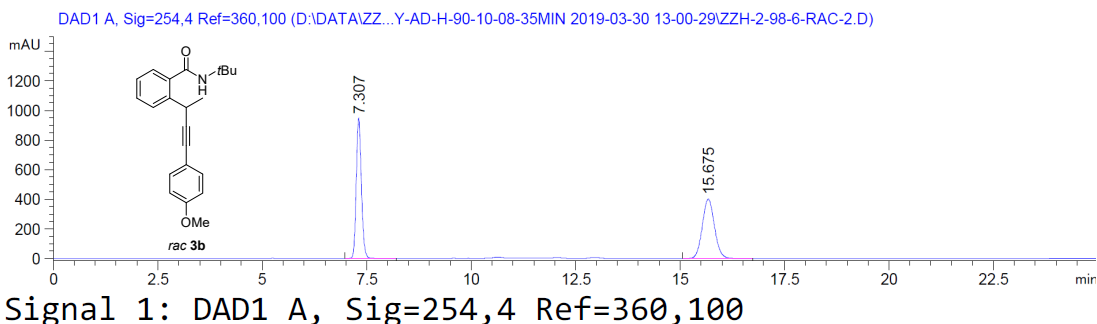

| Peak # | RetTime [min] | Type | Width [min] | Area [mAU*s] | Height [mAU] | Area %  |
|--------|---------------|------|-------------|--------------|--------------|---------|
| 1      | 7.307         | BB   | 0.1314      | 8072.63428   | 947.80261    | 49.9081 |
| 2      | 15.675        | BB   | 0.3136      | 8102.37402   | 401.16116    | 50.0919 |

Totals : 1.61750e4 1348.96378

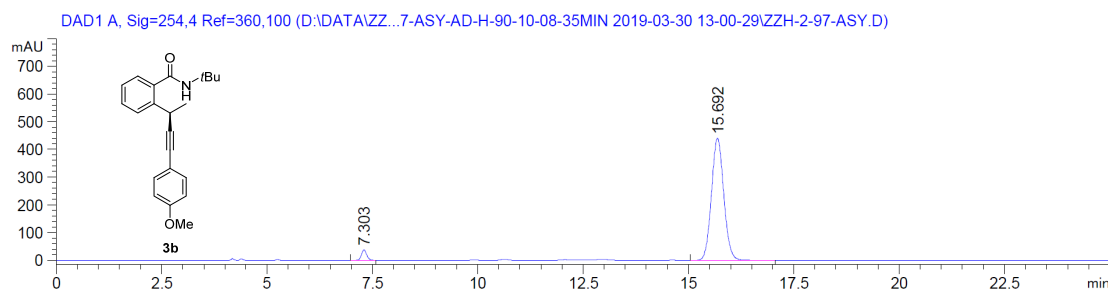

| Peak # | RetTime [min] | Type | Width [min] | Area [mAU*s] | Height [mAU] | Area %  |
|--------|---------------|------|-------------|--------------|--------------|---------|
| 1      | 7.303         | BB   | 0.1329      | 322.71863    | 37.31412     | 3.4802  |
| 2      | 15.692        | BB   | 0.3154      | 8950.29199   | 439.81516    | 96.5198 |

Totals : 9273.01062 477.12927

**Supplementary Figure 184** HPLC spectra for racemic and chiral **3b**. HPLC analysis: Chiralcel AD-H (*n*-hexane/*i*-PrOH = 90/10, flow rate 0.8 mL/min,  $\lambda$  = 254 nm),  $t_R$  (minor) = 7.30 min,  $t_R$  (major) = 15.69 min, 93% ee.



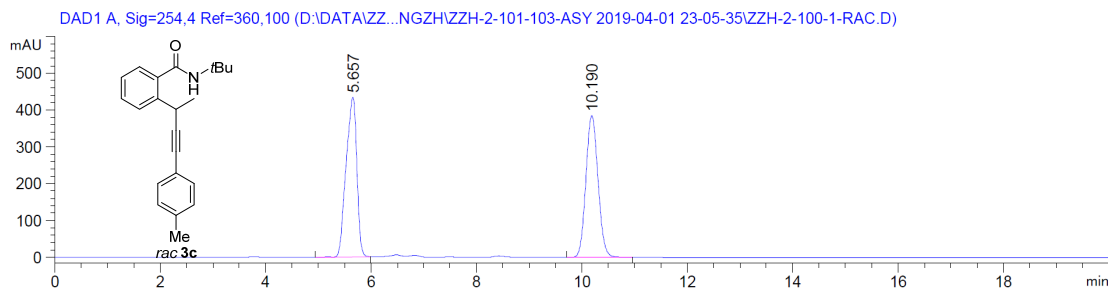

Signal 1: DAD1 A, Sig=254,4 Ref=360,100

| Peak # | RetTime [min] | Type | Width [min] | Area [mAU*s] | Height [mAU] | Area %  |
|--------|---------------|------|-------------|--------------|--------------|---------|
| 1      | 5.657         | BB   | 0.2403      | 6110.79395   | 433.93399    | 49.7760 |
| 2      | 10.190        | BB   | 0.2506      | 6165.79395   | 385.46082    | 50.2240 |

Totals : 1.22766e4 819.39481

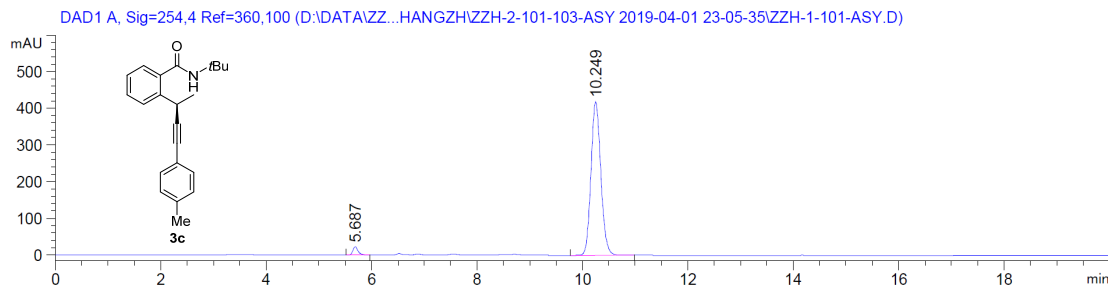

Signal 1: DAD1 A, Sig=254,4 Ref=360,100

| Peak # | RetTime [min] | Type | Width [min] | Area [mAU*s] | Height [mAU] | Area %  |
|--------|---------------|------|-------------|--------------|--------------|---------|
| 1      | 5.687         | BB   | 0.1049      | 157.79100    | 22.75697     | 2.8334  |
| 2      | 10.249        | BB   | 0.1991      | 5411.21094   | 417.90417    | 97.1666 |

Totals : 5569.00194 440.66115

**Supplementary Figure 185** HPLC spectra for racemic and chiral **3c**. HPLC analysis: Chiralcel AD-H (*n*-hexane/*i*-PrOH = 90/10, flow rate 0.8 mL/min,  $\lambda = 254$  nm),  $t_R$  (minor) = 5.69 min,  $t_R$  (major) = 10.25 min, 94% ee.

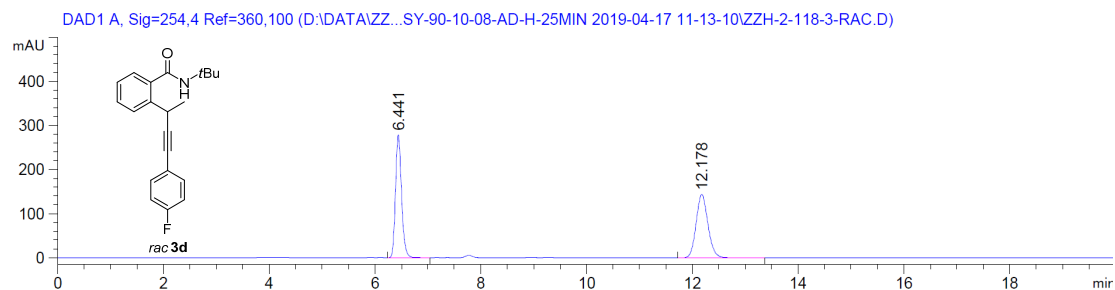

Signal 1: DAD1 A, Sig=254,4 Ref=360,100

| Peak # | RetTime [min] | Type | Width [min] | Area [mAU*s] | Height [mAU] | Area %  |
|--------|---------------|------|-------------|--------------|--------------|---------|
| 1      | 6.441         | BB   | 0.1222      | 2199.18164   | 278.14822    | 49.5947 |
| 2      | 12.178        | BB   | 0.2417      | 2235.12378   | 143.52707    | 50.4053 |

Totals : 4434.30542 421.67529

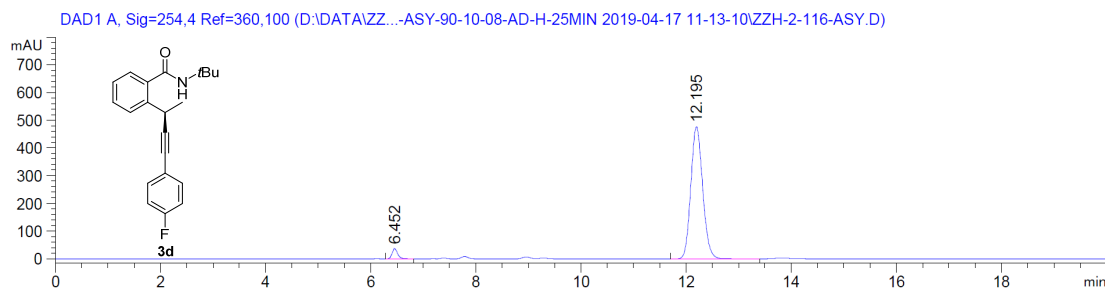

Signal 1: DAD1 A, Sig=254,4 Ref=360,100

| Peak # | RetTime [min] | Type | Width [min] | Area [mAU*s] | Height [mAU] | Area %  |
|--------|---------------|------|-------------|--------------|--------------|---------|
| 1      | 6.452         | BB   | 0.1142      | 279.57727    | 36.96203     | 3.6058  |
| 2      | 12.195        | BB   | 0.2432      | 7473.99756   | 476.00305    | 96.3942 |

Totals : 7753.57483 512.96508

**Supplementary Figure 186** HPLC spectra for racemic and chiral **3d**. HPLC analysis: Chiralcel AD-H (*n*-hexane/*i*-PrOH = 90/10, flow rate 0.8 mL/min,  $\lambda$  = 254 nm),  $t_R$  (minor) = 6.45 min,  $t_R$  (major) = 12.19 min, 93% ee.

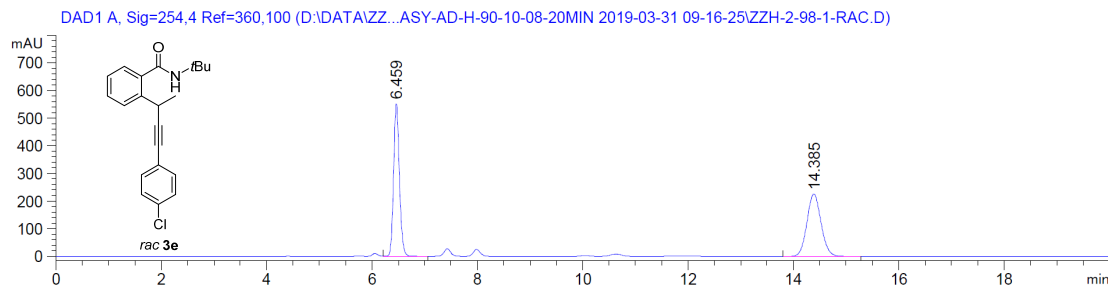

Signal 1: DAD1 A, Sig=254,4 Ref=360,100

| Peak # | RetTime [min] | Type | Width [min] | Area [mAU*s] | Height [mAU] | Area %  |
|--------|---------------|------|-------------|--------------|--------------|---------|
| 1      | 6.459         | VB   | 0.1169      | 4204.37646   | 551.75037    | 50.0770 |
| 2      | 14.385        | BB   | 0.2866      | 4191.44336   | 225.72449    | 49.9230 |

Totals : 8395.81982 777.47485

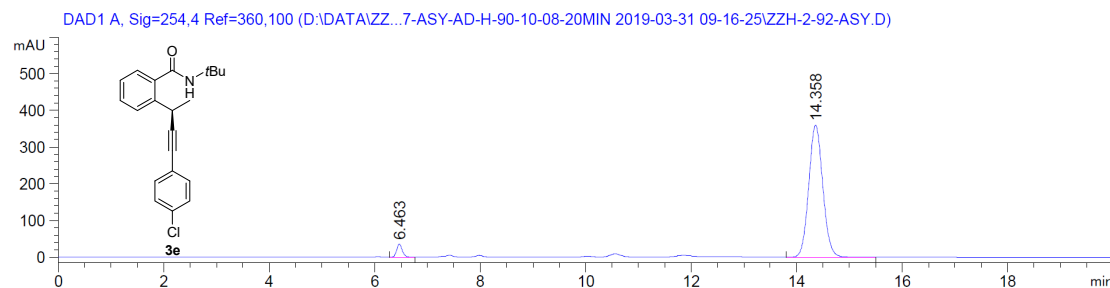

Signal 1: DAD1 A, Sig=254,4 Ref=360,100

| Peak # | RetTime [min] | Type | Width [min] | Area [mAU*s] | Height [mAU] | Area %  |
|--------|---------------|------|-------------|--------------|--------------|---------|
| 1      | 6.463         | VB   | 0.1148      | 263.11719    | 35.37709     | 3.8069  |
| 2      | 14.358        | BB   | 0.2858      | 6648.39941   | 359.49002    | 96.1931 |

Totals : 6911.51660 394.86712

**Supplementary Figure 187** HPLC spectra for racemic and chiral **3e**. HPLC analysis: Chiralcel AD-H (*n*-hexane/*i*-PrOH = 90/10, flow rate 0.8 mL/min,  $\lambda = 254$  nm),  $t_R$  (minor) = 6.46 min,  $t_R$  (major) = 14.36 min, 92% ee.

DAD1 A, Sig=254,4 Ref=360,100 (D:\DATA\ZZ...ASY-AD-H-98-2-08-20MIN 2019-04-02 09-25-32\ZZH-1-100-2-RAC.D)

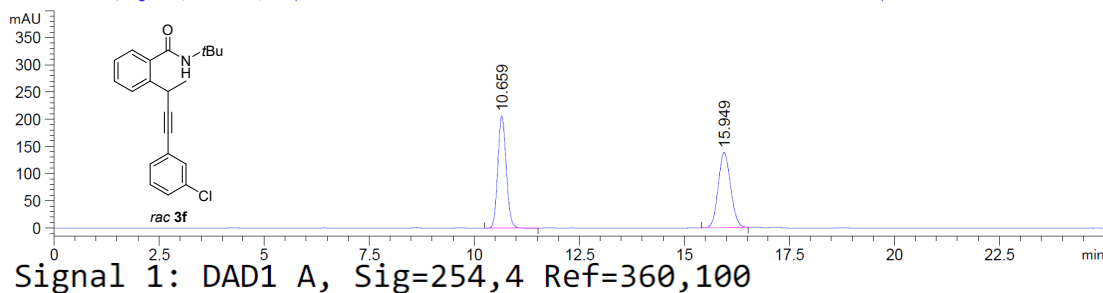

Signal 1: DAD1 A, Sig=254,4 Ref=360,100

| Peak # | RetTime [min] | Type | Width [min] | Area [mAU*s] | Height [mAU] | Area %  |
|--------|---------------|------|-------------|--------------|--------------|---------|
| 1      | 10.659        | BB   | 0.2161      | 2868.59106   | 206.51865    | 50.4112 |
| 2      | 15.949        | BB   | 0.3185      | 2821.79517   | 138.05780    | 49.5888 |

Totals : 5690.38623 344.57645

DAD1 A, Sig=254,4 Ref=360,100 (D:\DATA\ZZ...98-2-08-20MIN 2019-04-02 09-25-32\ZZH-102-ASY-98-2-08-AD-H.D)

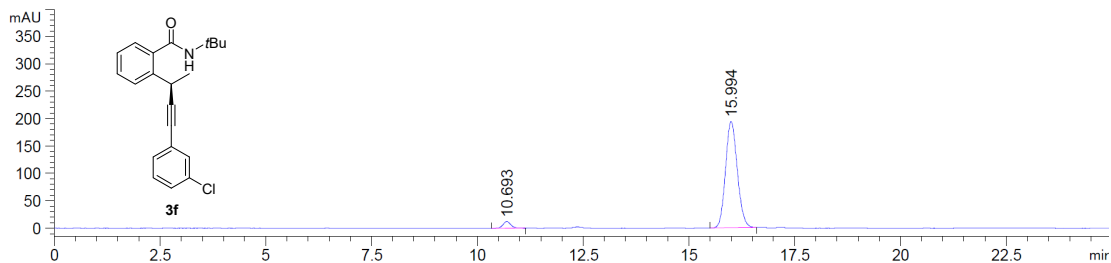

Signal 1: DAD1 A, Sig=254,4 Ref=360,100

| Peak # | RetTime [min] | Type | Width [min] | Area [mAU*s] | Height [mAU] | Area %  |
|--------|---------------|------|-------------|--------------|--------------|---------|
| 1      | 10.693        | BB   | 0.1951      | 153.26323    | 12.15823     | 3.9151  |
| 2      | 15.994        | BB   | 0.2978      | 3761.40942   | 194.35658    | 96.0849 |

Totals : 3914.67265 206.51481

**Supplementary Figure 188** HPLC spectra for racemic and chiral **3f**. HPLC analysis: Chiralcel AD-H (*n*-hexane/*i*-PrOH = 98/2, flow rate 0.8 mL/min,  $\lambda = 254$  nm),  $t_R$  (minor) = 10.69 min,  $t_R$  (major) = 15.99 min, 92% ee.

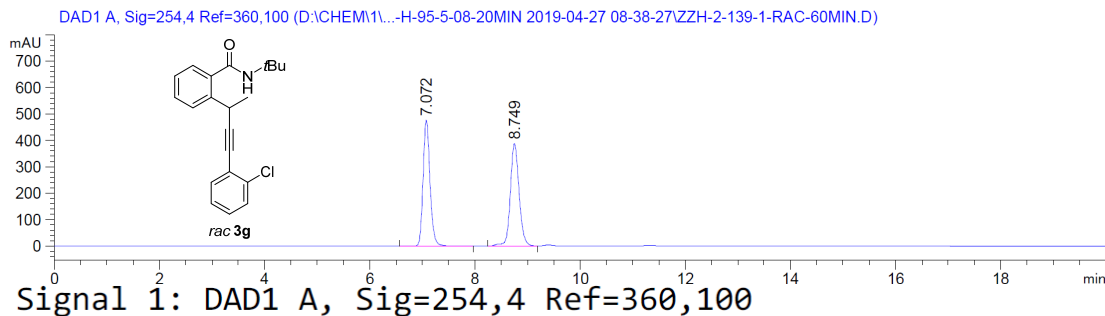

| Peak # | RetTime [min] | Type | Width [min] | Area [mAU*s] | Height [mAU] | Area %  |
|--------|---------------|------|-------------|--------------|--------------|---------|
| 1      | 7.072         | BB   | 0.1430      | 4354.89746   | 474.90552    | 49.2257 |
| 2      | 8.749         | VV   | 0.1753      | 4491.90479   | 387.19058    | 50.7743 |

Totals : 8846.80225 862.09610

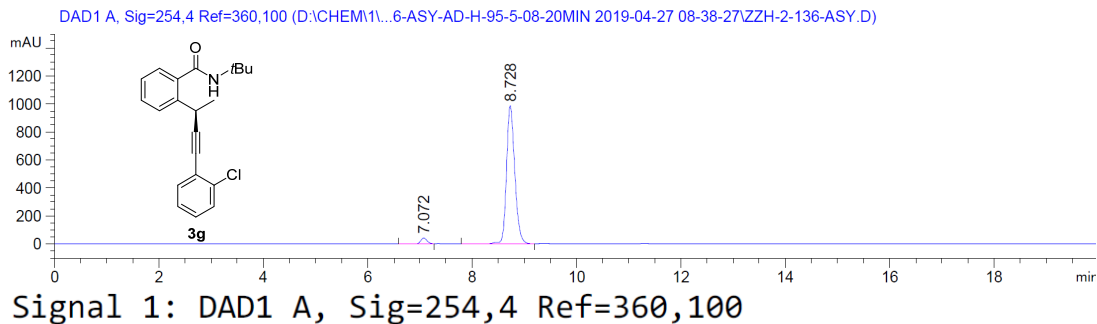

| Peak # | RetTime [min] | Type | Width [min] | Area [mAU*s] | Height [mAU] | Area %  |
|--------|---------------|------|-------------|--------------|--------------|---------|
| 1      | 7.072         | BV   | 0.1314      | 363.04837    | 42.61234     | 3.2362  |
| 2      | 8.728         | BV   | 0.1685      | 1.08555e4    | 985.88416    | 96.7638 |

Totals : 1.12185e4 1028.49649

**Supplementary Figure 189** HPLC spectra for racemic and chiral **3g**. HPLC analysis: Chiralcel AD-H (*n*-hexane/*i*-PrOH = 95/5, flow rate 0.8 mL/min,  $\lambda$  = 254 nm),  $t_R$  (minor) = 7.07 min,  $t_R$  (major) = 8.73 min, 93% ee.

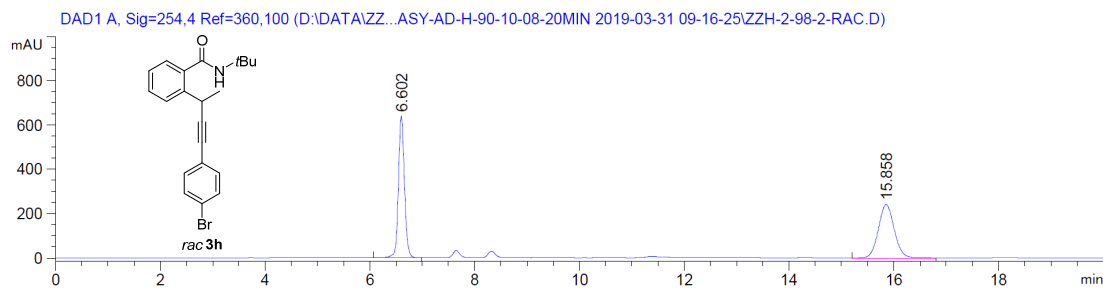

Signal 1: DAD1 A, Sig=254,4 Ref=360,100

| Peak # | RetTime [min] | Type | Width [min] | Area [mAU*s] | Height [mAU] | Area %  |
|--------|---------------|------|-------------|--------------|--------------|---------|
| 1      | 6.602         | BB   | 0.1229      | 5101.18115   | 640.47150    | 50.5365 |
| 2      | 15.858        | BB   | 0.3224      | 4992.87402   | 240.33957    | 49.4635 |

Totals : 1.00941e4 880.81107

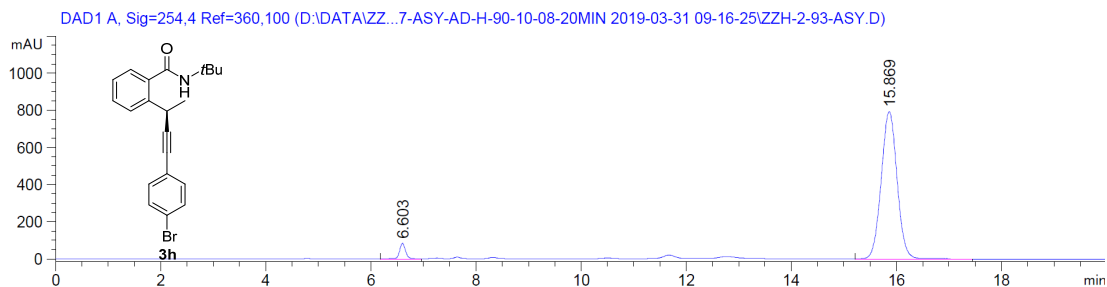

Signal 1: DAD1 A, Sig=254,4 Ref=360,100

| Peak # | RetTime [min] | Type | Width [min] | Area [mAU*s] | Height [mAU] | Area %  |
|--------|---------------|------|-------------|--------------|--------------|---------|
| 1      | 6.603         | BB   | 0.1189      | 651.59216    | 83.63357     | 3.7991  |
| 2      | 15.869        | BB   | 0.3230      | 1.64995e4    | 792.12903    | 96.2009 |

Totals : 1.71511e4 875.76260

**Supplementary Figure 190** HPLC spectra for racemic and chiral **3h**. HPLC analysis: Chiralcel AD-H (*n*-hexane/*i*-PrOH = 90/10, flow rate 0.8 mL/min,  $\lambda$  = 254 nm),  $t_R$  (minor) = 6.60 min,  $t_R$  (major) = 15.87 min, 92% ee.

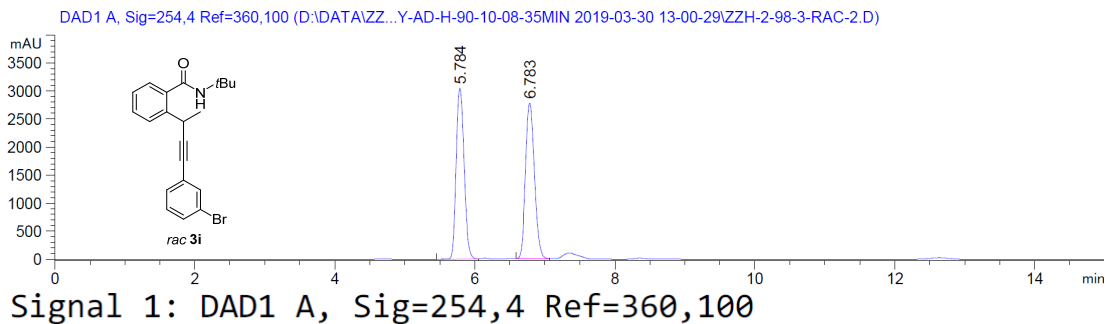

| Peak # | RetTime [min] | Type | Width [min] | Area [mAU*s] | Height [mAU] | Area %  |
|--------|---------------|------|-------------|--------------|--------------|---------|
| 1      | 5.784         | BV   | 0.1228      | 2.36933e4    | 3043.35791   | 49.0592 |
| 2      | 6.783         | VV   | 0.1392      | 2.46021e4    | 2780.25122   | 50.9408 |

Totals : 4.82954e4 5823.60913

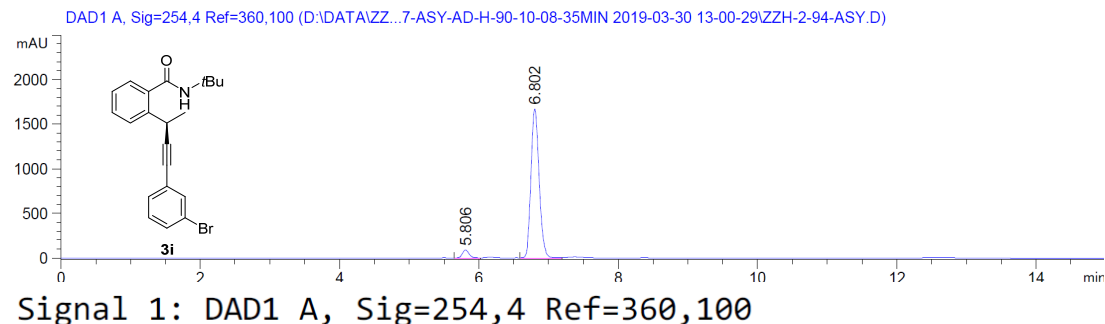

| Peak # | RetTime [min] | Type | Width [min] | Area [mAU*s] | Height [mAU] | Area %  |
|--------|---------------|------|-------------|--------------|--------------|---------|
| 1      | 5.806         | BV   | 0.1012      | 583.71942    | 88.20984     | 4.1751  |
| 2      | 6.802         | VV   | 0.1255      | 1.33971e4    | 1671.54565   | 95.8249 |

Totals : 1.39808e4 1759.75549

**Supplementary Figure 191** HPLC spectra for racemic and chiral **3i**. HPLC analysis: Chiralcel AD-H (*n*-hexane/*i*-PrOH = 90/10, flow rate 0.8 mL/min,  $\lambda$  = 254 nm),  $t_R$  (minor) = 5.81 min,  $t_R$  (major) = 6.80 min, 92% ee.

DAD1 A, Sig=254,4 Ref=360,100 (D:\DATA\ZZ...SY-90-10-08-AD-H-25MIN 2019-04-17 11-13-10\ZZH-2-118-1-RAC.D)

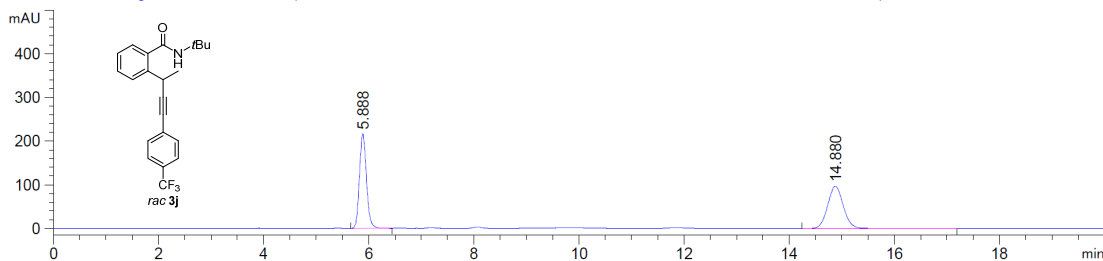

Signal 1: DAD1 A, Sig=254,4 Ref=360,100

| Peak # | RetTime [min] | Type | Width [min] | Area [mAU*s] | Height [mAU] | Area %  |
|--------|---------------|------|-------------|--------------|--------------|---------|
| 1      | 5.888         | BB   | 0.1442      | 2007.04370   | 216.41475    | 50.0773 |
| 2      | 14.880        | BB   | 0.3214      | 2000.84534   | 96.70835     | 49.9227 |

Totals : 4007.88904 313.12310

DAD1 A, Sig=254,4 Ref=360,100 (D:\DATA\ZZ...ASY-90-10-08-AD-H-25MIN 2019-04-17 11-13-10\ZZH-2-115-ASY.D)

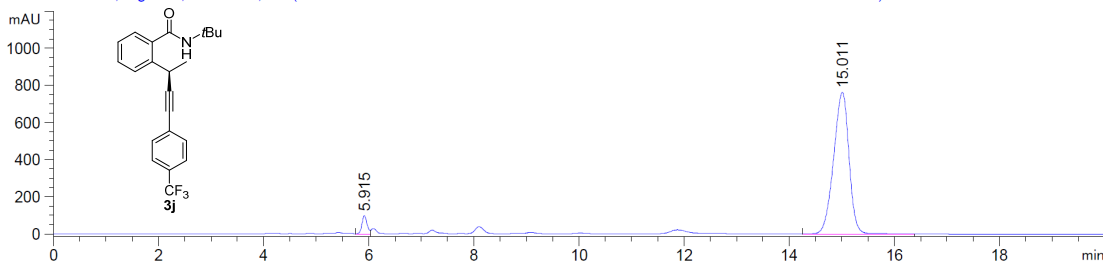

Signal 1: DAD1 A, Sig=254,4 Ref=360,100

| Peak # | RetTime [min] | Type | Width [min] | Area [mAU*s] | Height [mAU] | Area %  |
|--------|---------------|------|-------------|--------------|--------------|---------|
| 1      | 5.915         | BV   | 0.1025      | 654.16425    | 97.17193     | 4.0746  |
| 2      | 15.011        | BB   | 0.3116      | 1.54006e4    | 762.59540    | 95.9254 |

Totals : 1.60548e4 859.76733

**Supplementary Figure 192** HPLC spectra for racemic and chiral **3j**. HPLC analysis: Chiralcel AD-H (*n*-hexane/*i*-PrOH = 90/10, flow rate 0.8 mL/min,  $\lambda$  = 254 nm),  $t_R$  (minor) = 5.92 min,  $t_R$  (major) = 15.01 min, 92% ee.



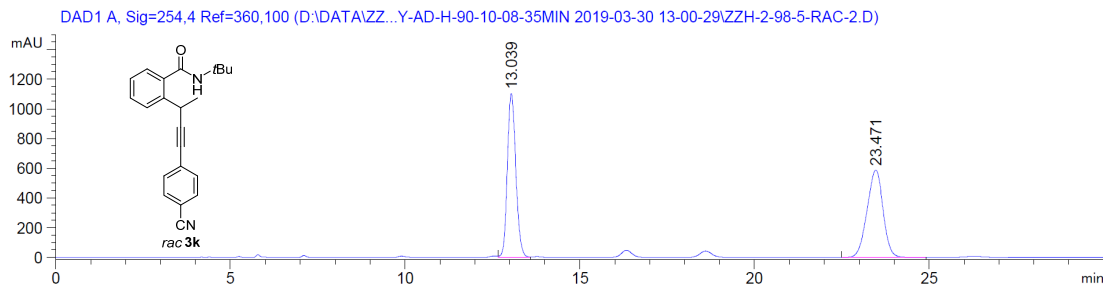

Signal 1: DAD1 A, Sig=254,4 Ref=360,100

| Peak # | RetTime [min] | Type | Width [min] | Area [mAU*s] | Height [mAU] | Area %  |
|--------|---------------|------|-------------|--------------|--------------|---------|
| 1      | 13.039        | VV   | 0.2598      | 1.85038e4    | 1102.47131   | 49.8750 |
| 2      | 23.471        | BB   | 0.4933      | 1.85966e4    | 587.53174    | 50.1250 |

Totals : 3.71004e4 1690.00305

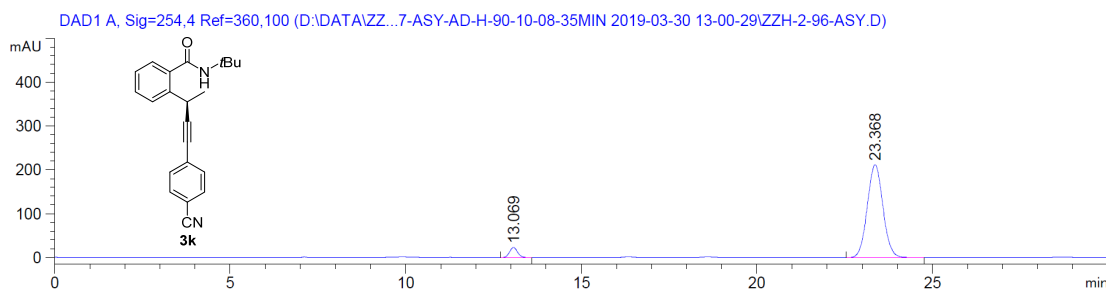

Signal 1: DAD1 A, Sig=254,4 Ref=360,100

| Peak # | RetTime [min] | Type | Width [min] | Area [mAU*s] | Height [mAU] | Area %  |
|--------|---------------|------|-------------|--------------|--------------|---------|
| 1      | 13.069        | BB   | 0.2467      | 366.11151    | 22.88248     | 5.2743  |
| 2      | 23.368        | BB   | 0.4798      | 6575.30469   | 212.02191    | 94.7257 |

Totals : 6941.41620 234.90439

**Supplementary Figure 193** HPLC spectra for racemic and chiral **3k**. HPLC analysis: Chiralcel AD-H (*n*-hexane/*i*-PrOH = 90/10, flow rate 0.8 mL/min,  $\lambda$  = 254 nm),  $t_R$  (minor) = 13.07 min,  $t_R$  (major) = 23.37 min, 89% ee.

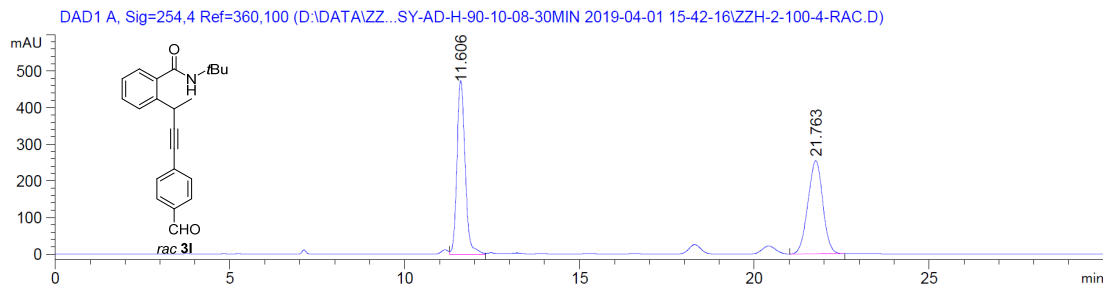

| Peak # | RetTime [min] | Type | Width [min] | Area [mAU*s] | Height [mAU] | Area %  |
|--------|---------------|------|-------------|--------------|--------------|---------|
| 1      | 11.606        | VV   | 0.2490      | 7679.94189   | 474.14502    | 50.4314 |
| 2      | 21.763        | BB   | 0.4601      | 7548.54053   | 254.44875    | 49.5686 |

Totals : 1.52285e4 728.59377

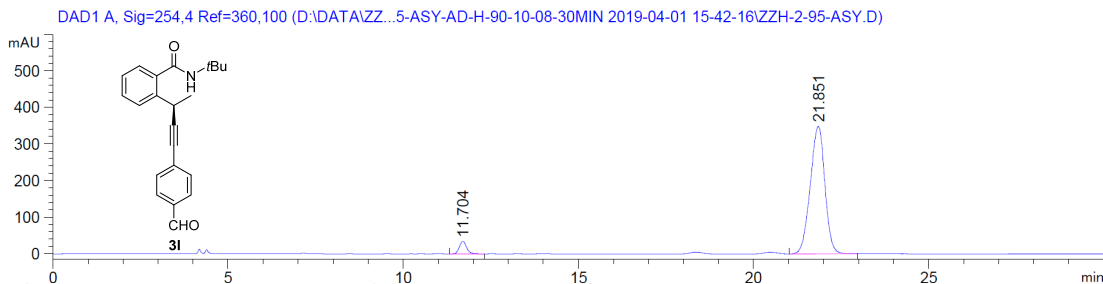

| Peak # | RetTime [min] | Type | Width [min] | Area [mAU*s] | Height [mAU] | Area %  |
|--------|---------------|------|-------------|--------------|--------------|---------|
| 1      | 11.704        | BB   | 0.2210      | 489.27295    | 34.18181     | 4.6204  |
| 2      | 21.851        | BB   | 0.4503      | 1.01001e4    | 348.33322    | 95.3796 |

Totals : 1.05894e4 382.51503

**Supplementary Figure 194** HPLC spectra for racemic and chiral **3I**. HPLC analysis: Chiralcel AD-H (*n*-hexane/*i*-PrOH = 90/10, flow rate 0.8 mL/min,  $\lambda$  = 254 nm),  $t_R$  (minor) = 11.70 min,  $t_R$  (major) = 21.85 min, 91% ee.

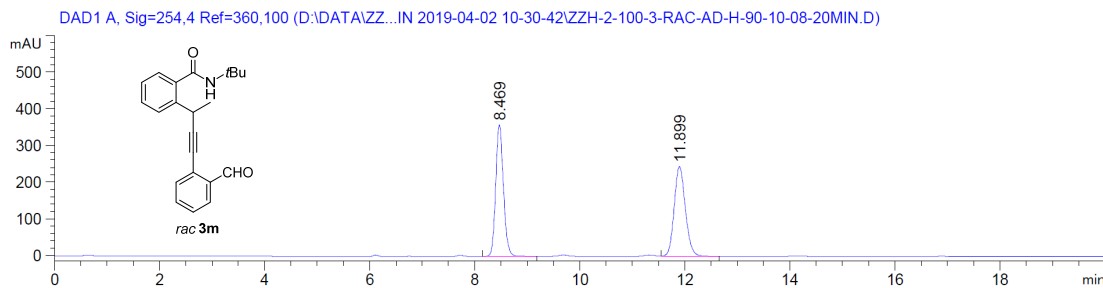

Signal 1: DAD1 A, Sig=254,4 Ref=360,100

| Peak # | RetTime [min] | Type | Width [min] | Area [mAU*s] | Height [mAU] | Area %  |
|--------|---------------|------|-------------|--------------|--------------|---------|
| 1      | 8.469         | BB   | 0.1570      | 3652.68652   | 358.19037    | 50.2625 |
| 2      | 11.899        | VB   | 0.2284      | 3614.54004   | 244.61084    | 49.7375 |

Totals : 7267.22656 602.80121

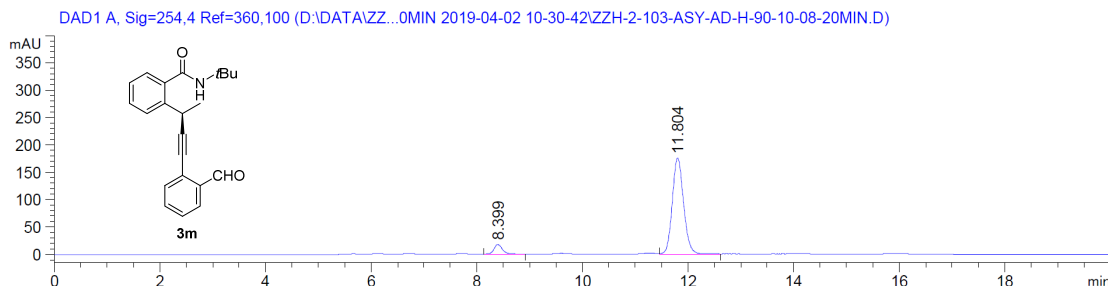

Signal 1: DAD1 A, Sig=254,4 Ref=360,100

| Peak # | RetTime [min] | Type | Width [min] | Area [mAU*s] | Height [mAU] | Area %  |
|--------|---------------|------|-------------|--------------|--------------|---------|
| 1      | 8.399         | BB   | 0.1634      | 182.23894    | 17.23092     | 6.6002  |
| 2      | 11.804        | VB   | 0.2277      | 2578.88135   | 175.27034    | 93.3998 |

Totals : 2761.12029 192.50126

**Supplementary Figure 195** HPLC spectra for racemic and chiral **3m**. HPLC analysis: Chiralcel AD-H (*n*-hexane/*i*-PrOH = 90/10, flow rate 0.8 mL/min,  $\lambda$  = 254 nm),  $t_R$  (minor) = 8.40 min,  $t_R$  (major) = 11.80 min, 87% ee.

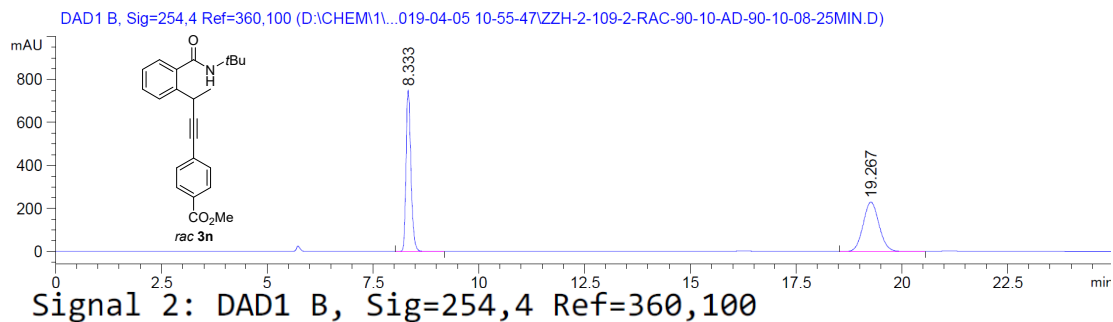

| Peak # | RetTime [min] | Type | Width [min] | Area [mAU*s] | Height [mAU] | Area %  |
|--------|---------------|------|-------------|--------------|--------------|---------|
| 1      | 8.333         | VV   | 0.1260      | 6033.41943   | 748.89923    | 50.0259 |
| 2      | 19.267        | VV   | 0.4055      | 6027.16748   | 230.17532    | 49.9741 |

Totals : 1.20606e4 979.07455

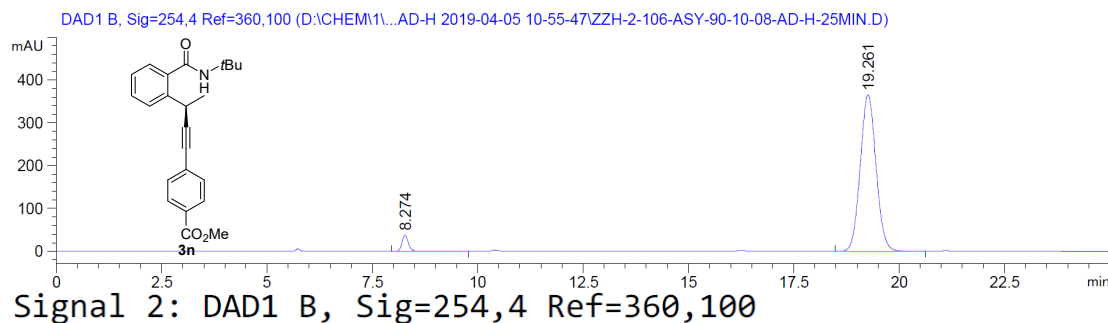

| Peak # | RetTime [min] | Type | Width [min] | Area [mAU*s] | Height [mAU] | Area %  |
|--------|---------------|------|-------------|--------------|--------------|---------|
| 1      | 8.274         | VB   | 0.1628      | 395.72702    | 37.58322     | 3.9729  |
| 2      | 19.261        | VV   | 0.4055      | 9565.05664   | 365.26340    | 96.0271 |

Totals : 9960.78366 402.84661

**Supplementary Figure 196** HPLC spectra for racemic and chiral **3n**. HPLC analysis: Chiralcel AD-H (*n*-hexane/*i*-PrOH = 90/10, flow rate 0.8 mL/min,  $\lambda = 254$  nm),  $t_R$  (minor) = 8.27 min,  $t_R$  (major) = 19.26 min, 92% ee.

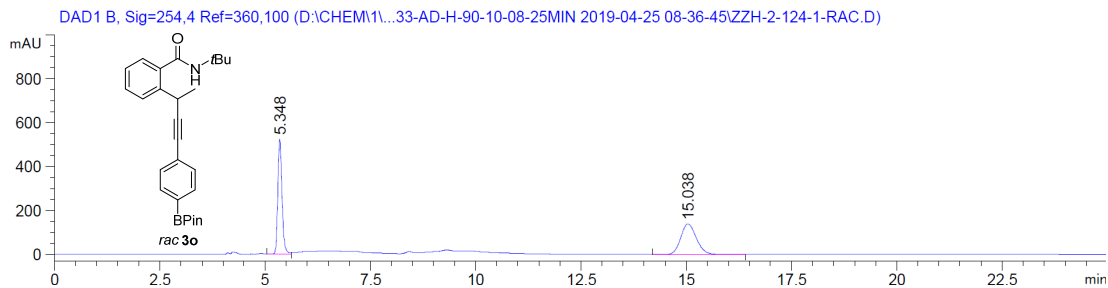

Signal 2: DAD1 B, Sig=254,4 Ref=360,100

| Peak # | RetTime [min] | Type | Width [min] | Area [mAU*s] | Height [mAU] | Area %  |
|--------|---------------|------|-------------|--------------|--------------|---------|
| 1      | 5.348         | BV   | 0.1131      | 3628.99683   | 522.17450    | 50.3195 |
| 2      | 15.038        | BV   | 0.3964      | 3582.90771   | 139.16425    | 49.6805 |

Totals : 7211.90454 661.33875

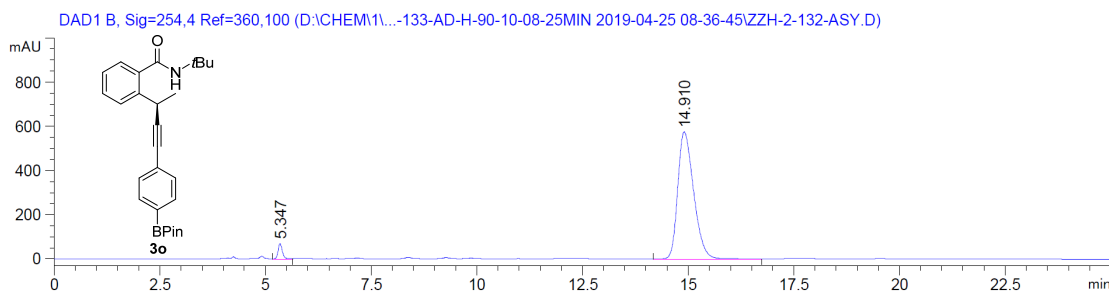

Signal 2: DAD1 B, Sig=254,4 Ref=360,100

| Peak # | RetTime [min] | Type | Width [min] | Area [mAU*s] | Height [mAU] | Area %  |
|--------|---------------|------|-------------|--------------|--------------|---------|
| 1      | 5.347         | BV   | 0.1082      | 474.53540    | 69.06821     | 3.0793  |
| 2      | 14.910        | BV   | 0.3991      | 1.49362e4    | 574.88385    | 96.9207 |

Totals : 1.54107e4 643.95206

**Supplementary Figure 197** HPLC spectra for racemic and chiral **3o**. HPLC analysis: Chiralcel AD-H (*n*-hexane/*i*-PrOH = 90/10, flow rate 0.8 mL/min,  $\lambda = 254$  nm),  $t_R$  (minor) = 5.35 min,  $t_R$  (major) = 14.91 min, 94% ee.

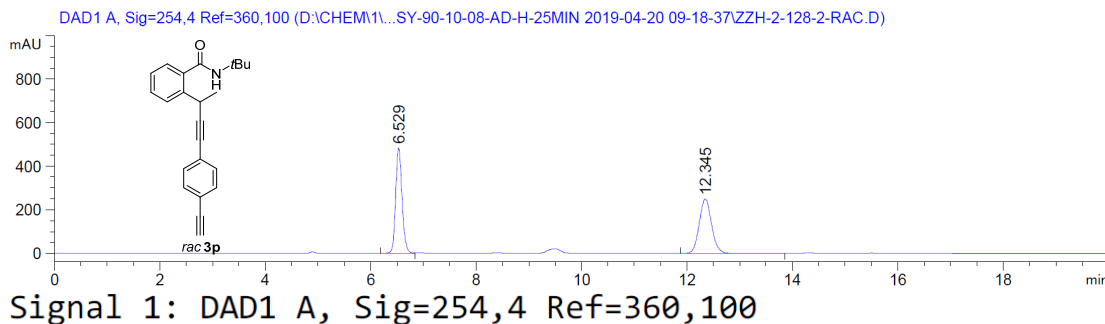

| Peak # | RetTime [min] | Type | Width [min] | Area [mAU*s] | Height [mAU] | Area %  |
|--------|---------------|------|-------------|--------------|--------------|---------|
| 1      | 6.529         | BV   | 0.1261      | 4067.30103   | 483.75757    | 50.0881 |
| 2      | 12.345        | VV   | 0.2492      | 4052.99927   | 249.94768    | 49.9119 |

Totals : 8120.30029 733.70525

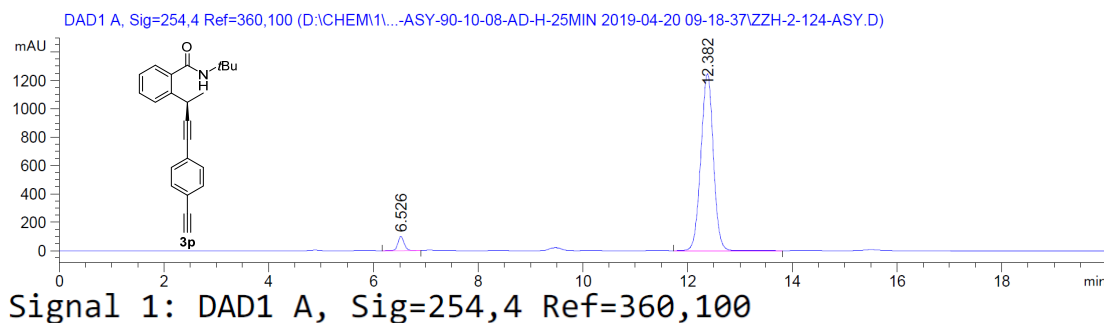

| Peak # | RetTime [min] | Type | Width [min] | Area [mAU*s] | Height [mAU] | Area %  |
|--------|---------------|------|-------------|--------------|--------------|---------|
| 1      | 6.526         | BB   | 0.1264      | 840.41577    | 99.63342     | 3.9208  |
| 2      | 12.382        | VV   | 0.2571      | 2.05944e4    | 1244.37427   | 96.0792 |

Totals : 2.14348e4 1344.00768

**Supplementary Figure 198** HPLC spectra for racemic and chiral **3p**. HPLC analysis: Chiralcel AD-H (*n*-hexane/*i*-PrOH = 90/10, flow rate 0.8 mL/min,  $\lambda = 254$  nm),  $t_R$  (minor) = 6.53 min,  $t_R$  (major) = 12.38 min, 92% ee.

DAD1 A, Sig=254,4 Ref=360,100 (D:\DATA\ZZ...ASY-80-20-08-30 2019-05-23 17-23-04\ZZH-2-167-RAC-80-20-08.D)

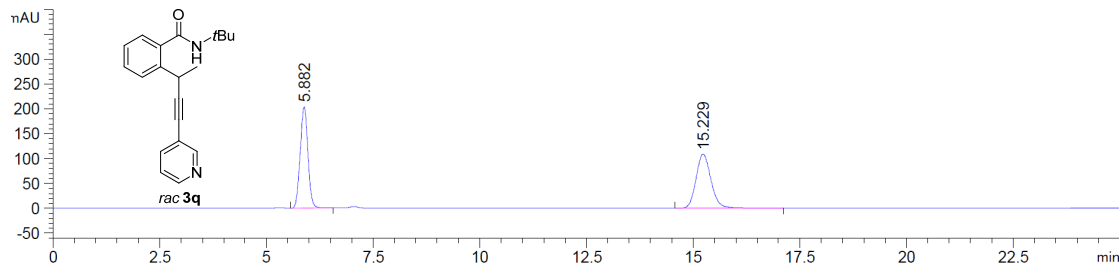

Signal 1: DAD1 A, Sig=254,4 Ref=360,100

| Peak # | RetTime [min] | Type | Width [min] | Area [mAU*s] | Height [mAU] | Area %  |
|--------|---------------|------|-------------|--------------|--------------|---------|
| 1      | 5.882         | BB   | 0.1950      | 2568.52881   | 203.79858    | 49.0300 |
| 2      | 15.229        | BB   | 0.3759      | 2670.15405   | 108.94673    | 50.9700 |

Totals : 5238.68286 312.74532

DAD1 A, Sig=254,4 Ref=360,100 (D:\DATA\ZZ...ASY-80-20-08-30 2019-05-23 17-23-04\ZZH-2-166-ASY-80-20-08.D)

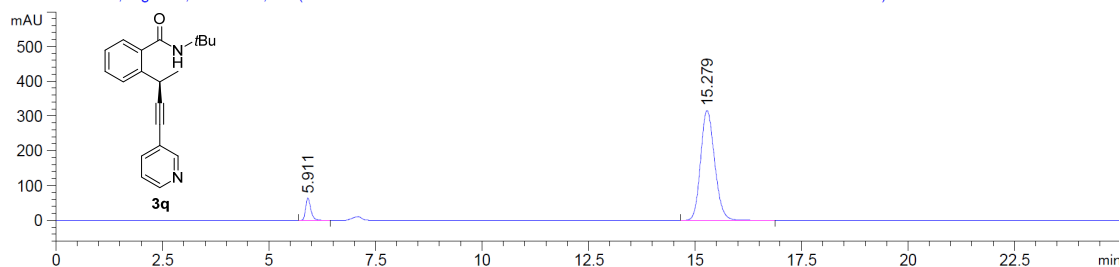

Signal 1: DAD1 A, Sig=254,4 Ref=360,100

| Peak # | RetTime [min] | Type | Width [min] | Area [mAU*s] | Height [mAU] | Area %  |
|--------|---------------|------|-------------|--------------|--------------|---------|
| 1      | 5.911         | BB   | 0.1283      | 536.31628    | 63.62977     | 6.9062  |
| 2      | 15.279        | BB   | 0.3549      | 7229.45020   | 316.03403    | 93.0938 |

Totals : 7765.76648 379.66380

**Supplementary Figure 199** HPLC spectra for racemic and chiral **3q**. HPLC analysis: Chiralcel AD-H (*n*-hexane/*i*-PrOH = 80/20, flow rate 0.8 mL/min,  $\lambda$  = 254 nm),  $t_R$  (minor) = 5.91 min,  $t_R$  (major) = 15.28 min, 86% ee.

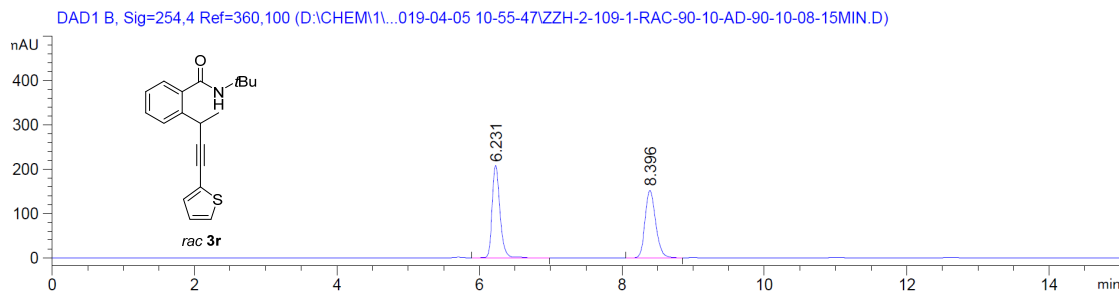

Signal 2: DAD1 B, Sig=254,4 Ref=360,100

| Peak # | RetTime [min] | Type | Width [min] | Area [mAU*s] | Height [mAU] | Area %  |
|--------|---------------|------|-------------|--------------|--------------|---------|
| 1      | 6.231         | VV   | 0.1216      | 1589.48315   | 207.05449    | 50.3620 |
| 2      | 8.396         | BV   | 0.1643      | 1566.62976   | 151.90187    | 49.6380 |

Totals : 3156.11292 358.95636

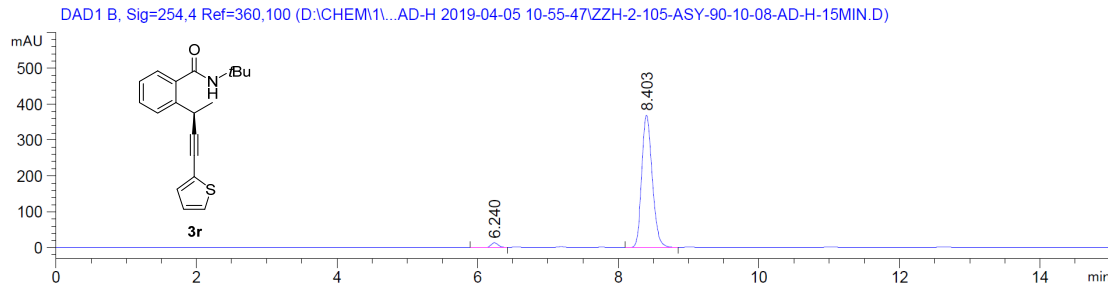

Signal 2: DAD1 B, Sig=254,4 Ref=360,100

| Peak # | RetTime [min] | Type | Width [min] | Area [mAU*s] | Height [mAU] | Area %  |
|--------|---------------|------|-------------|--------------|--------------|---------|
| 1      | 6.240         | VV   | 0.1196      | 100.92943    | 13.44950     | 2.5723  |
| 2      | 8.403         | VV   | 0.1611      | 3822.72998   | 368.29492    | 97.4277 |

Totals : 3923.65941 381.74442

**Supplementary Figure 200** HPLC spectra for racemic and chiral **3r**. HPLC analysis: Chiralcel AD-H (*n*-hexane/*i*-PrOH = 90/10, flow rate 0.8 mL/min,  $\lambda$  = 254 nm),  $t_R$  (minor) = 6.24 min,  $t_R$  (major) = 8.40 min, 95% ee.



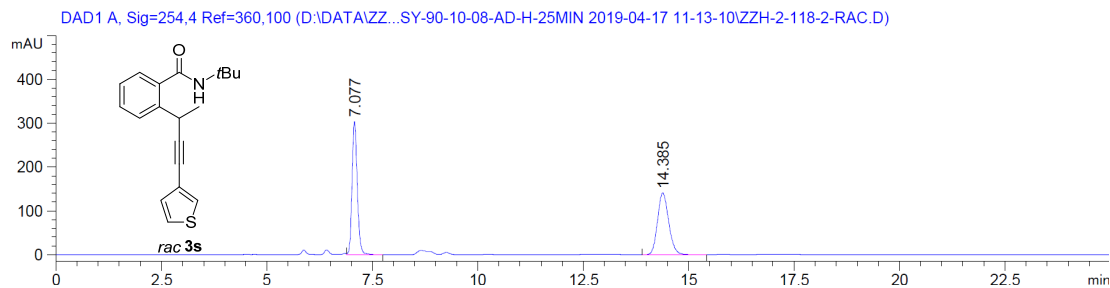

Signal 1: DAD1 A, Sig=254,4 Ref=360,100

| Peak # | RetTime [min] | Type | Width [min] | Area [mAU*s] | Height [mAU] | Area %  |
|--------|---------------|------|-------------|--------------|--------------|---------|
| 1      | 7.077         | VB   | 0.1321      | 2607.15845   | 303.77466    | 50.0038 |
| 2      | 14.385        | BB   | 0.2852      | 2606.76343   | 141.33185    | 49.9962 |

Totals : 5213.92188 445.10651

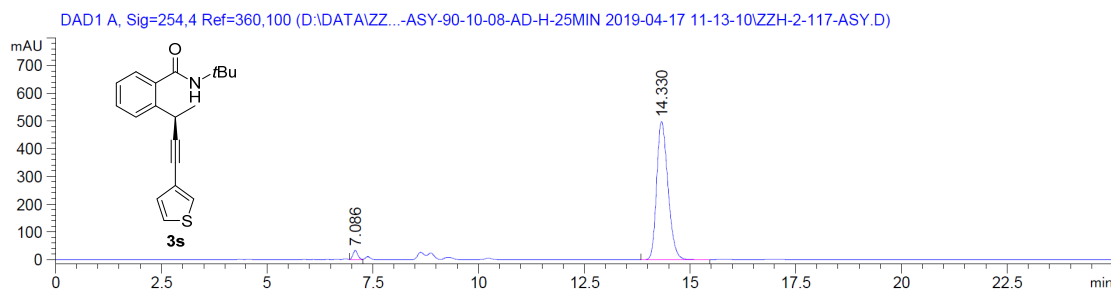

Signal 1: DAD1 A, Sig=254,4 Ref=360,100

| Peak # | RetTime [min] | Type | Width [min] | Area [mAU*s] | Height [mAU] | Area %  |
|--------|---------------|------|-------------|--------------|--------------|---------|
| 1      | 7.086         | VV   | 0.1218      | 268.52942    | 33.40827     | 2.8233  |
| 2      | 14.330        | BB   | 0.2866      | 9242.80957   | 497.91702    | 97.1767 |

Totals : 9511.33899 531.32529

**Supplementary Figure 201** HPLC spectra for racemic and chiral **3s**. HPLC analysis: Chiralcel AD-H (*n*-hexane/*i*-PrOH = 90/10, flow rate 0.8 mL/min,  $\lambda$  = 254 nm),  $t_R$  (minor) = 7.09 min,  $t_R$  (major) = 14.33 min, 94% ee.

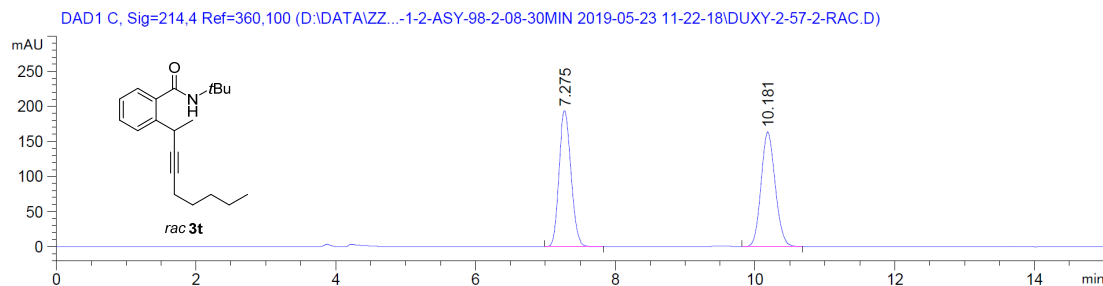

Signal 3: DAD1 C, Sig=214,4 Ref=360,100

| Peak # | RetTime [min] | Type | Width [min] | Area [mAU*s] | Height [mAU] | Area %  |
|--------|---------------|------|-------------|--------------|--------------|---------|
| 1      | 7.275         | BB   | 0.1872      | 2313.00098   | 193.92171    | 50.0208 |
| 2      | 10.181        | BB   | 0.2206      | 2311.07397   | 163.82076    | 49.9792 |

Totals : 4624.07495 357.74246

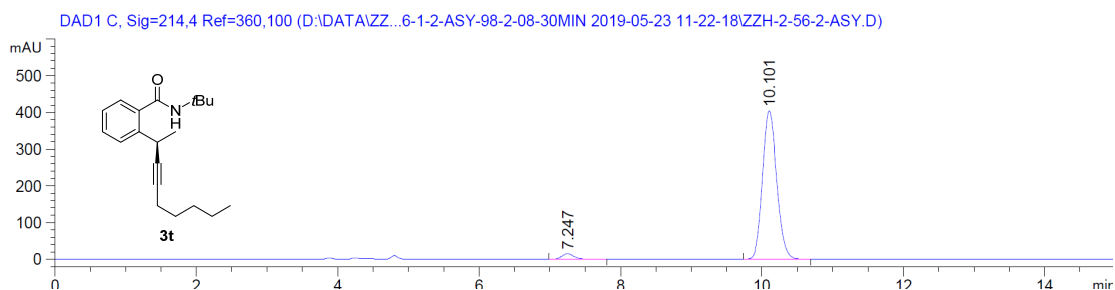

Signal 3: DAD1 C, Sig=214,4 Ref=360,100

| Peak # | RetTime [min] | Type | Width [min] | Area [mAU*s] | Height [mAU] | Area %  |
|--------|---------------|------|-------------|--------------|--------------|---------|
| 1      | 7.247         | BB   | 0.1888      | 180.85454    | 14.98338     | 3.1126  |
| 2      | 10.101        | BB   | 0.2167      | 5629.51367   | 403.57828    | 96.8874 |

Totals : 5810.36821 418.56166

**Supplementary Figure 202** HPLC spectra for racemic and chiral **3t**. HPLC analysis: Chiralcel AD-H (*n*-hexane/*i*-PrOH = 98/2, flow rate 0.8 mL/min,  $\lambda$  = 214 nm),  $t_R$  (minor) = 7.25 min,  $t_R$  (major) = 10.10 min, 94% ee.

DAD1 C, Sig=214,4 Ref=360,100 (D:\DATA\ZZ...6-3-ASY-95-5-08-30MIN 2019-05-23 18-22-58\DUXY-2-57-3-RAC2.D)

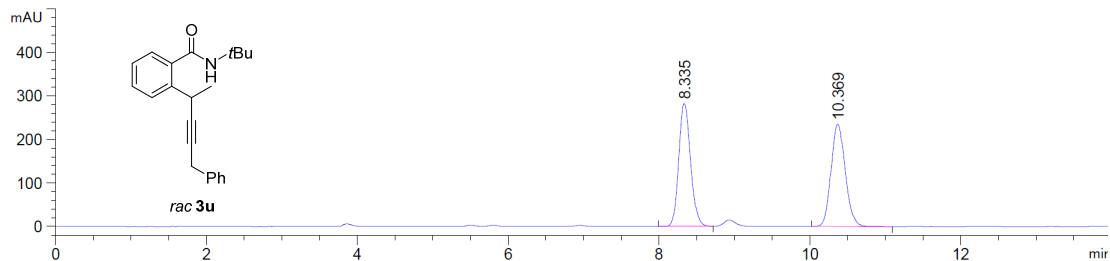

Signal 3: DAD1 C, Sig=214,4 Ref=360,100

| Peak # | RetTime [min] | Type | Width [min] | Area [mAU*s] | Height [mAU] | Area %  |
|--------|---------------|------|-------------|--------------|--------------|---------|
| 1      | 8.335         | BV   | 0.1690      | 3071.35986   | 282.14682    | 49.8586 |
| 2      | 10.369        | BB   | 0.2030      | 3088.77710   | 235.53348    | 50.1414 |

Totals : 6160.13696 517.68030

DAD1 C, Sig=214,4 Ref=360,100 (D:\DATA\ZZ...6-3-ASY-95-5-08-30MIN 2019-05-23 18-22-58\DUXY-2-56-3-ASY-D)

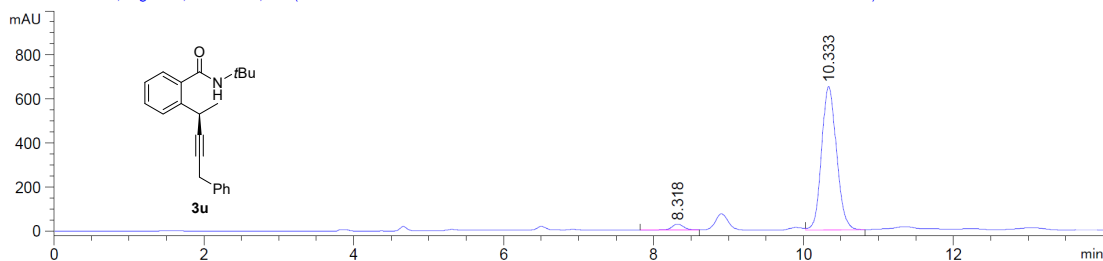

Signal 3: DAD1 C, Sig=214,4 Ref=360,100

| Peak # | RetTime [min] | Type | Width [min] | Area [mAU*s] | Height [mAU] | Area %  |
|--------|---------------|------|-------------|--------------|--------------|---------|
| 1      | 8.318         | BV   | 0.1850      | 333.60049    | 27.21399     | 3.5642  |
| 2      | 10.333        | VB   | 0.2141      | 9026.22070   | 649.77014    | 96.4358 |

Totals : 9359.82120 676.98413

**Supplementary Figure 203** HPLC spectra for racemic and chiral **3u**. HPLC analysis: Chiralcel AD-H (*n*-hexane/*i*-PrOH = 95/5, flow rate 0.8 mL/min,  $\lambda = 214$  nm),  $t_R$  (minor) = 8.32 min,  $t_R$  (major) = 10.33 min, 93% ee.

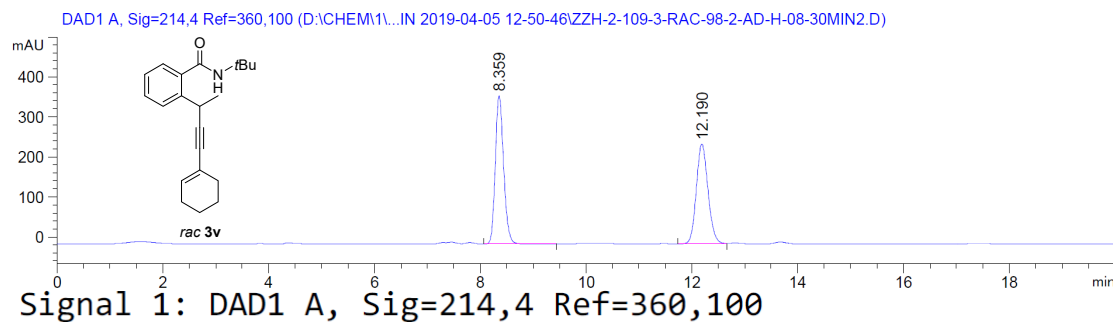

| Peak # | RetTime [min] | Type | Width [min] | Area [mAU*s] | Height [mAU] | Area %  |
|--------|---------------|------|-------------|--------------|--------------|---------|
| 1      | 8.359         | BB   | 0.1679      | 4051.36938   | 369.50290    | 51.4057 |
| 2      | 12.190        | BV   | 0.2392      | 3829.79834   | 249.37503    | 48.5943 |

Totals : 7881.16772 618.87793

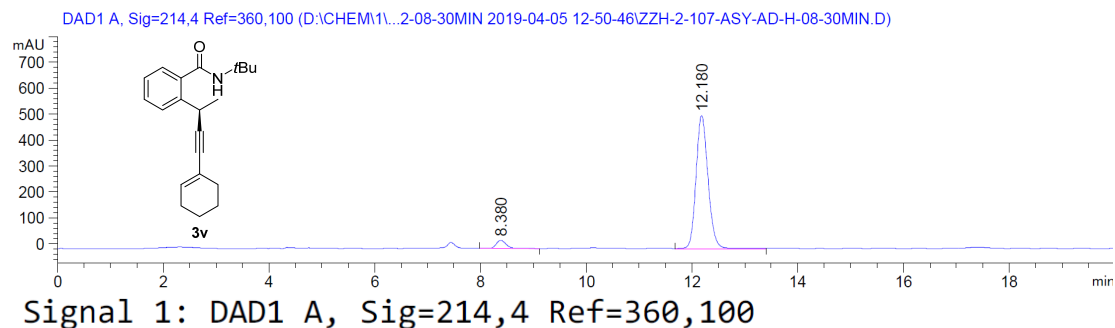

| Peak # | RetTime [min] | Type | Width [min] | Area [mAU*s] | Height [mAU] | Area %  |
|--------|---------------|------|-------------|--------------|--------------|---------|
| 1      | 8.380         | BB   | 0.2020      | 399.70309    | 31.09023     | 4.7519  |
| 2      | 12.180        | VV   | 0.2425      | 8011.64893   | 512.19305    | 95.2481 |

Totals : 8411.35202 543.28329

**Supplementary Figure 204** HPLC spectra for racemic and chiral **3v**. HPLC analysis: Chiralcel AD-H (*n*-hexane/*i*-PrOH = 98/2, flow rate 0.8 mL/min,  $\lambda = 214$  nm),  $t_R$  (minor) = 8.38 min,  $t_R$  (major) = 12.18 min, 90% ee.

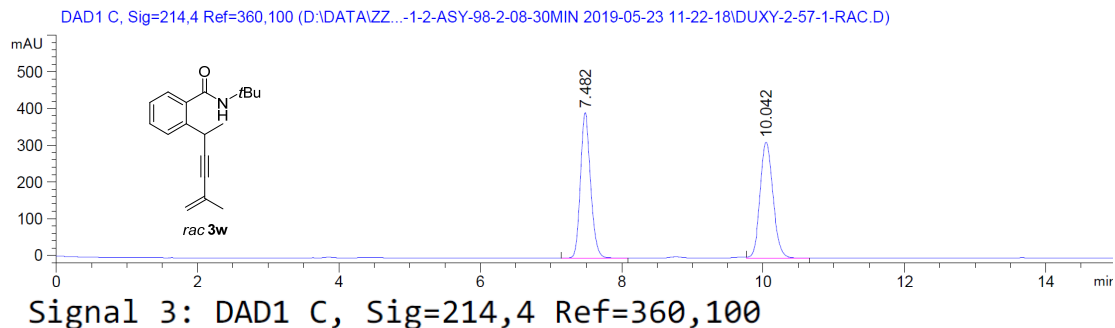

| Peak # | RetTime [min] | Type | Width [min] | Area [mAU*s] | Height [mAU] | Area %  |
|--------|---------------|------|-------------|--------------|--------------|---------|
| 1      | 7.482         | BB   | 0.1549      | 3972.04346   | 396.56424    | 49.8320 |
| 2      | 10.042        | VB   | 0.1957      | 3998.82251   | 315.92395    | 50.1680 |

Totals : 7970.86597 712.48819

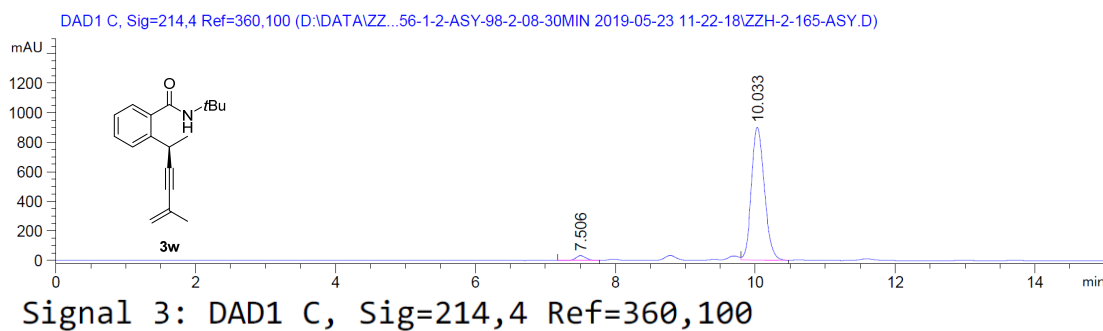

| Peak # | RetTime [min] | Type | Width [min] | Area [mAU*s] | Height [mAU] | Area %  |
|--------|---------------|------|-------------|--------------|--------------|---------|
| 1      | 7.506         | BV   | 0.1558      | 336.45709    | 33.31292     | 2.8356  |
| 2      | 10.033        | VV   | 0.1976      | 1.15292e4    | 899.01721    | 97.1644 |

Totals : 1.18657e4 932.33013

**Supplementary Figure 205** HPLC spectra for racemic and chiral **3w**. HPLC analysis: Chiralcel AD-H (*n*-hexane/*i*-PrOH = 98/2, flow rate 0.8 mL/min,  $\lambda$  = 214 nm),  $t_R$  (minor) = 7.51 min,  $t_R$  (major) = 10.03 min, 94% ee.

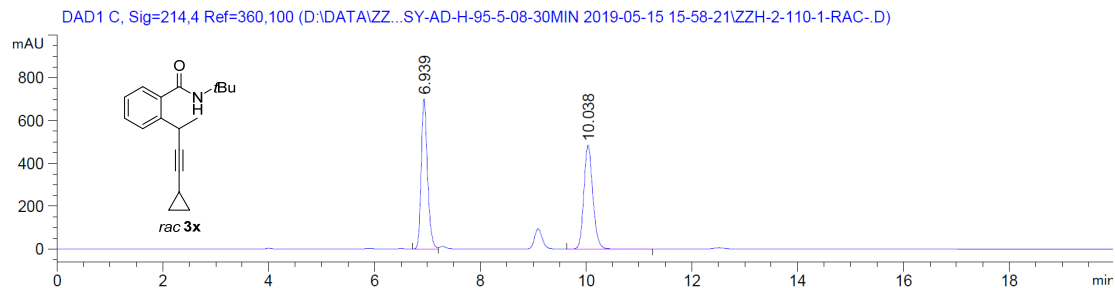

Signal 3: DAD1 C, Sig=214,4 Ref=360,100

| Peak # | RetTime [min] | Type | Width [min] | Area [mAU*s] | Height [mAU] | Area %  |
|--------|---------------|------|-------------|--------------|--------------|---------|
| 1      | 6.939         | VV   | 0.1241      | 5777.97900   | 701.26483    | 50.2953 |
| 2      | 10.038        | BB   | 0.1815      | 5710.13916   | 484.40717    | 49.7047 |

Totals : 1.14881e4 1185.67200

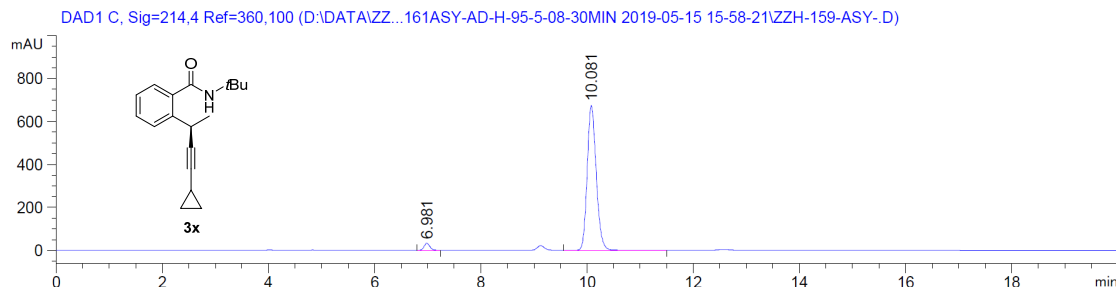

Signal 3: DAD1 C, Sig=214,4 Ref=360,100

| Peak # | RetTime [min] | Type | Width [min] | Area [mAU*s] | Height [mAU] | Area %  |
|--------|---------------|------|-------------|--------------|--------------|---------|
| 1      | 6.981         | BB   | 0.1205      | 256.05124    | 33.02571     | 3.0946  |
| 2      | 10.081        | BB   | 0.1826      | 8017.95850   | 674.86096    | 96.9054 |

Totals : 8274.00974 707.88667

**Supplementary Figure 206** HPLC spectra for racemic and chiral **3x**. HPLC analysis: Chiralcel AD-H (*n*-hexane/*i*-PrOH = 95/5, flow rate 0.8 mL/min,  $\lambda = 214$  nm),  $t_R$  (minor) = 6.98 min,  $t_R$  (major) = 10.08 min, 94% ee.

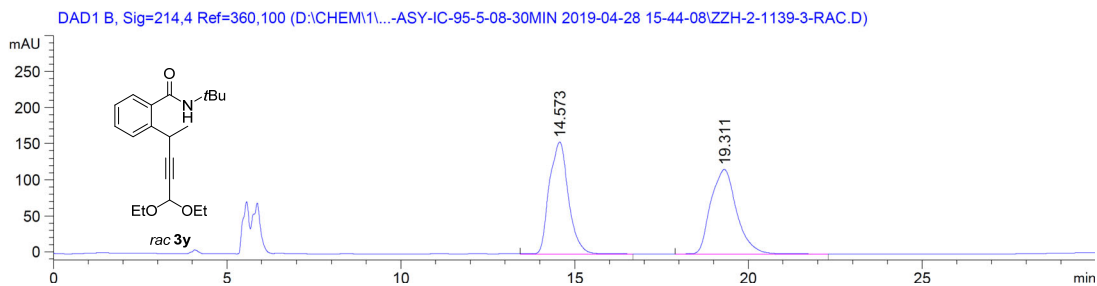

Signal 2: DAD1 B, Sig=214,4 Ref=360,100

| Peak # | RetTime [min] | Type | Width [min] | Area [mAU*s] | Height [mAU] | Area %  |
|--------|---------------|------|-------------|--------------|--------------|---------|
| 1      | 14.573        | VB   | 0.5378      | 5924.29590   | 155.03220    | 49.4853 |
| 2      | 19.311        | BB   | 0.8252      | 6047.53223   | 117.36452    | 50.5147 |

Totals : 1.19718e4 272.39672

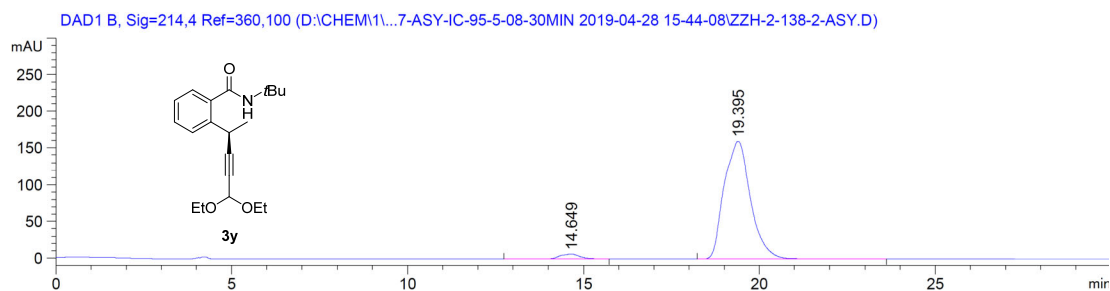

Signal 2: DAD1 B, Sig=214,4 Ref=360,100

| Peak # | RetTime [min] | Type | Width [min] | Area [mAU*s] | Height [mAU] | Area %  |
|--------|---------------|------|-------------|--------------|--------------|---------|
| 1      | 14.649        | BB   | 0.5582      | 274.41687    | 6.80877      | 3.1757  |
| 2      | 19.395        | BB   | 0.7326      | 8366.66699   | 160.38777    | 96.8243 |

Totals : 8641.08386 167.19654

**Supplementary Figure 207** HPLC spectra for racemic and chiral **3y**. HPLC analysis: Chiralcel IC (*n*-hexane/*i*-PrOH = 95/5, flow rate 0.8 mL/min,  $\lambda$  = 214 nm),  $t_R$  (minor) = 14.65 min,  $t_R$  (major) = 19.40 min, 94% ee.

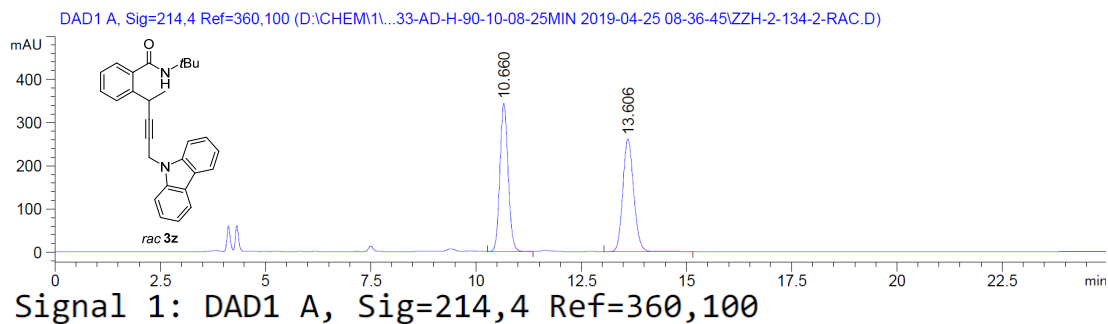

| Peak # | RetTime [min] | Type | Width [min] | Area [mAU*s] | Height [mAU] | Area %  |
|--------|---------------|------|-------------|--------------|--------------|---------|
| 1      | 10.660        | BV   | 0.2109      | 4661.41553   | 342.29874    | 49.8675 |
| 2      | 13.606        | BV   | 0.2780      | 4686.18750   | 260.40308    | 50.1325 |

Totals : 9347.60303 602.70181

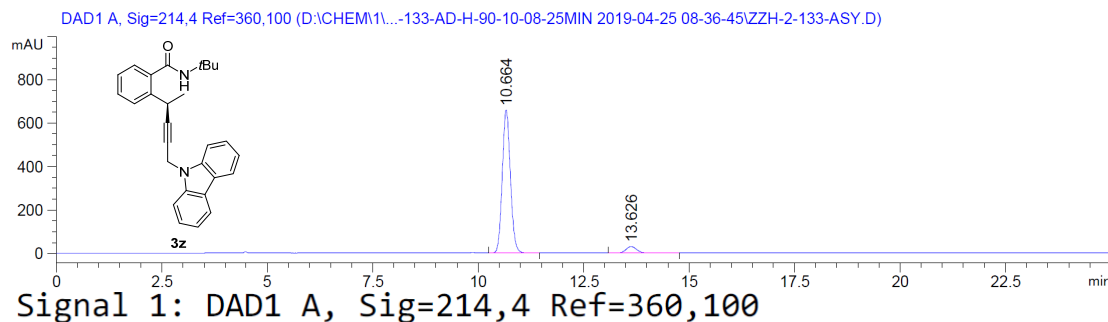

| Peak # | RetTime [min] | Type | Width [min] | Area [mAU*s] | Height [mAU] | Area %  |
|--------|---------------|------|-------------|--------------|--------------|---------|
| 1      | 10.664        | BV   | 0.2048      | 8828.30566   | 656.84717    | 94.2907 |
| 2      | 13.626        | BV   | 0.2710      | 534.54926    | 30.12840     | 5.7093  |

Totals : 9362.85492 686.97557

**Supplementary Figure 208** HPLC spectra for racemic and chiral **3z**. HPLC analysis: Chiralcel AD-H (*n*-hexane/*i*-PrOH = 90/10, flow rate 0.8 mL/min,  $\lambda = 214$  nm),  $t_R$  (major) = 10.66 min,  $t_R$  (minor) = 13.63 min, 89% ee.



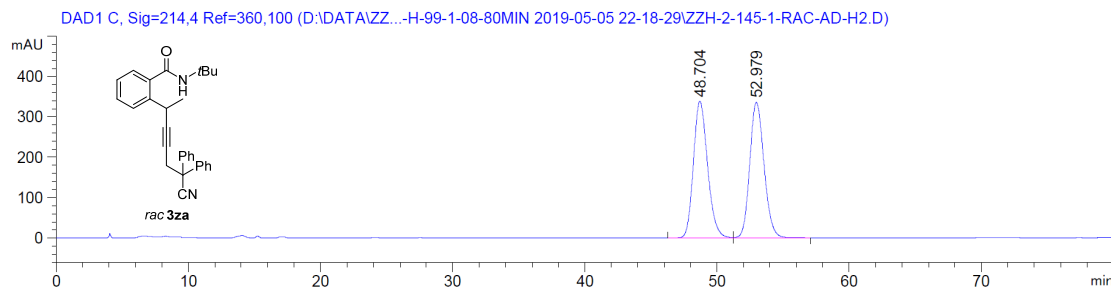

Signal 3: DAD1 C, Sig=214,4 Ref=360,100

| Peak # | RetTime [min] | Type | Width [min] | Area [mAU*s] | Height [mAU] | Area %  |
|--------|---------------|------|-------------|--------------|--------------|---------|
| 1      | 48.704        | BV   | 1.1449      | 2.51372e4    | 338.29974    | 49.9748 |
| 2      | 52.979        | VB   | 1.1620      | 2.51625e4    | 335.12097    | 50.0252 |

Totals : 5.02996e4 673.42072

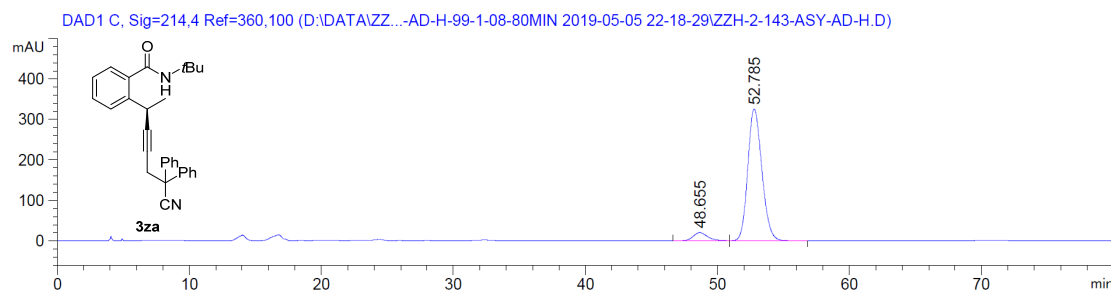

Signal 3: DAD1 C, Sig=214,4 Ref=360,100

| Peak # | RetTime [min] | Type | Width [min] | Area [mAU*s] | Height [mAU] | Area %  |
|--------|---------------|------|-------------|--------------|--------------|---------|
| 1      | 48.655        | BB   | 1.1131      | 1494.55237   | 19.83427     | 5.8422  |
| 2      | 52.785        | BB   | 1.1516      | 2.40873e4    | 325.39319    | 94.1578 |

Totals : 2.55819e4 345.22746

**Supplementary Figure 209** HPLC spectra for racemic and chiral **3za**. HPLC analysis: Chiralcel AD-H (*n*-hexane/*i*-PrOH = 99/1, flow rate 0.8 mL/min,  $\lambda = 214$  nm),  $t_R$  (minor) = 48.66 min,  $t_R$  (major) = 52.79 min, 88% ee.

DAD1 C, Sig=214,4 Ref=360,100 (D:\DATA\ZZ...ASY-AD-H-95-5-08-30MIN 2019-05-15 15-58-21\ZZH-2-163-1-RAC.D)

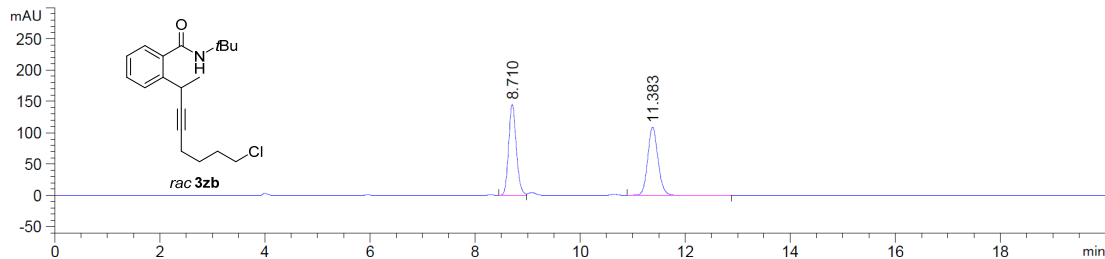

Signal 3: DAD1 C, Sig=214,4 Ref=360,100

| Peak # | RetTime [min] | Type | Width [min] | Area [mAU*s] | Height [mAU] | Area %  |
|--------|---------------|------|-------------|--------------|--------------|---------|
| 1      | 8.710         | VV   | 0.1566      | 1475.95056   | 145.24469    | 49.7225 |
| 2      | 11.383        | BB   | 0.2099      | 1492.42676   | 108.86433    | 50.2775 |

Totals : 2968.37732 254.10902

DAD1 C, Sig=214,4 Ref=360,100 (D:\DATA\ZZ...61ASY-AD-H-95-5-08-30MIN 2019-05-15 15-58-21\ZZH-2-161-ASY.D)

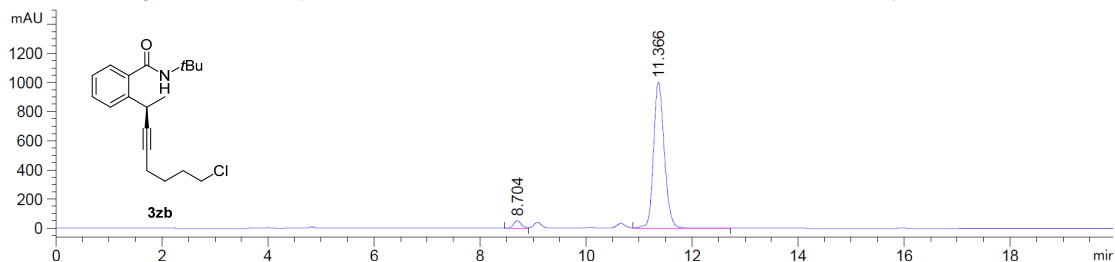

Signal 3: DAD1 C, Sig=214,4 Ref=360,100

| Peak # | RetTime [min] | Type | Width [min] | Area [mAU*s] | Height [mAU] | Area %  |
|--------|---------------|------|-------------|--------------|--------------|---------|
| 1      | 8.704         | BV   | 0.1569      | 528.73047    | 51.86445     | 3.6122  |
| 2      | 11.366        | VB   | 0.2163      | 1.41086e4    | 1001.79272   | 96.3878 |

Totals : 1.46373e4 1053.65717

**Supplementary Figure 210** HPLC spectra for racemic and chiral **3zb**. HPLC analysis: Chiralcel AD-H (*n*-hexane/*i*-PrOH = 95/5, flow rate 0.8 mL/min,  $\lambda = 214$  nm),  $t_R$  (minor) = 8.70 min,  $t_R$  (major) = 11.37 min, 93% ee.

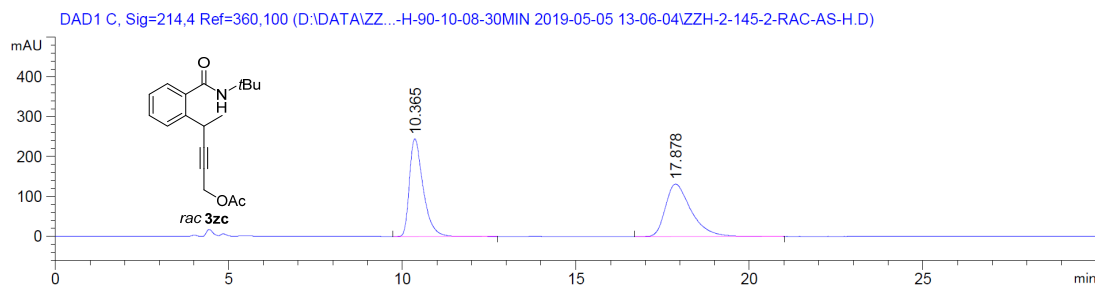

Signal 3: DAD1 C, Sig=214,4 Ref=360,100

| Peak # | RetTime [min] | Type | Width [min] | Area [mAU*s] | Height [mAU] | Area %  |
|--------|---------------|------|-------------|--------------|--------------|---------|
| 1      | 10.365        | BB   | 0.4162      | 6727.83057   | 245.13141    | 49.9614 |
| 2      | 17.878        | BB   | 0.7747      | 6738.22803   | 131.30544    | 50.0386 |

Totals : 1.34661e4 376.43684

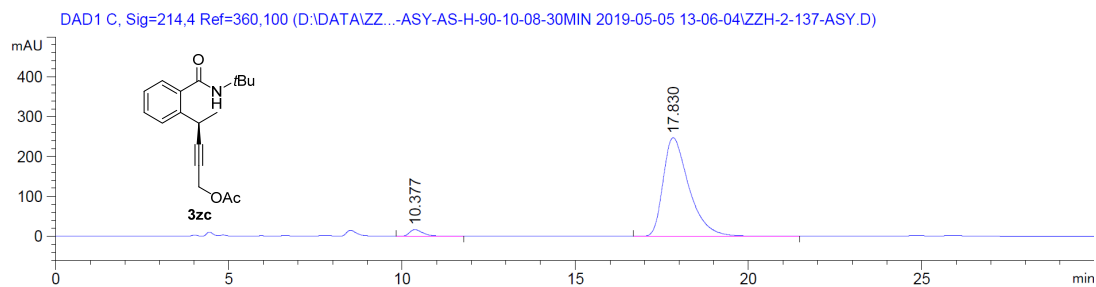

Signal 3: DAD1 C, Sig=214,4 Ref=360,100

| Peak # | RetTime [min] | Type | Width [min] | Area [mAU*s] | Height [mAU] | Area %  |
|--------|---------------|------|-------------|--------------|--------------|---------|
| 1      | 10.377        | BB   | 0.4135      | 455.76947    | 16.74649     | 3.4313  |
| 2      | 17.830        | BB   | 0.7849      | 1.28268e4    | 247.39139    | 96.5687 |

Totals : 1.32826e4 264.13787

**Supplementary Figure 211** HPLC spectra for racemic and chiral **3zc**. HPLC analysis: Chiralcel AD-H (*n*-hexane/*i*-PrOH = 90/10, flow rate 0.8 mL/min,  $\lambda$  = 214 nm),  $t_R$  (minor) = 10.38 min,  $t_R$  (major) = 17.83 min, 93% ee.

DAD1 C, Sig=214,4 Ref=360,100 (D:\DATA\ZZ...SY-AD-H-80-20-08-20MIN 2019-05-15 19-31-01\ZZH-2-162-2-RAC.D)

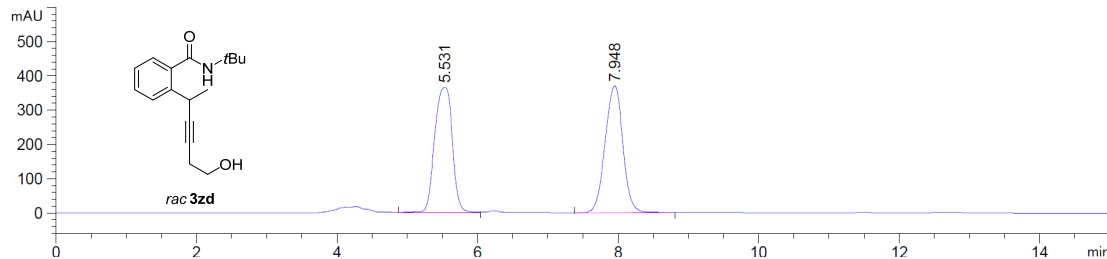

Signal 3: DAD1 C, Sig=214,4 Ref=360,100

| Peak # | RetTime [min] | Type | Width [min] | Area [mAU*s] | Height [mAU] | Area %  |
|--------|---------------|------|-------------|--------------|--------------|---------|
| 1      | 5.531         | BV   | 0.2845      | 6340.88037   | 365.30557    | 49.4466 |
| 2      | 7.948         | BB   | 0.2746      | 6482.80859   | 369.68283    | 50.5534 |

Totals : 1.28237e4 734.98840

DAD1 C, Sig=214,4 Ref=360,100 (D:\DATA\ZZ...-ASY-AD-H-80-20-08-20MIN 2019-05-15 19-31-01\ZZH-2-162-ASY.D)

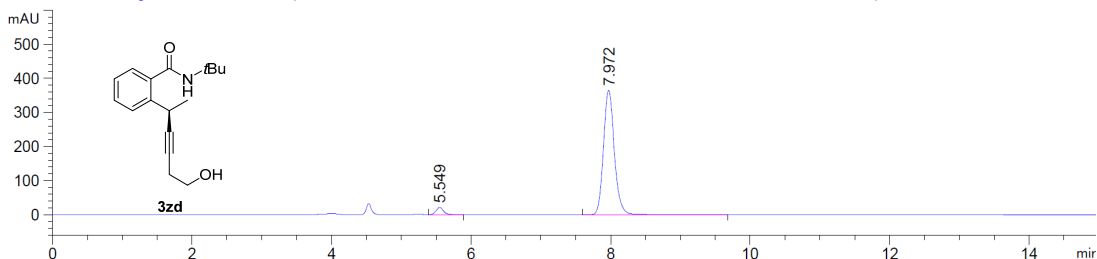

Signal 3: DAD1 C, Sig=214,4 Ref=360,100

| Peak # | RetTime [min] | Type | Width [min] | Area [mAU*s] | Height [mAU] | Area %  |
|--------|---------------|------|-------------|--------------|--------------|---------|
| 1      | 5.549         | VB   | 0.1085      | 148.62312    | 21.02804     | 3.6233  |
| 2      | 7.972         | BB   | 0.1663      | 3953.20776   | 365.30444    | 96.3767 |

Totals : 4101.83089 386.33248

**Supplementary Figure 212** HPLC spectra for racemic and chiral **3zd**. HPLC analysis: Chiralcel AD-H (*n*-hexane/*i*-PrOH = 80/20, flow rate 0.8 mL/min,  $\lambda$  = 214 nm),  $t_R$  (minor) = 5.55 min,  $t_R$  (major) = 7.97 min, 93% ee.

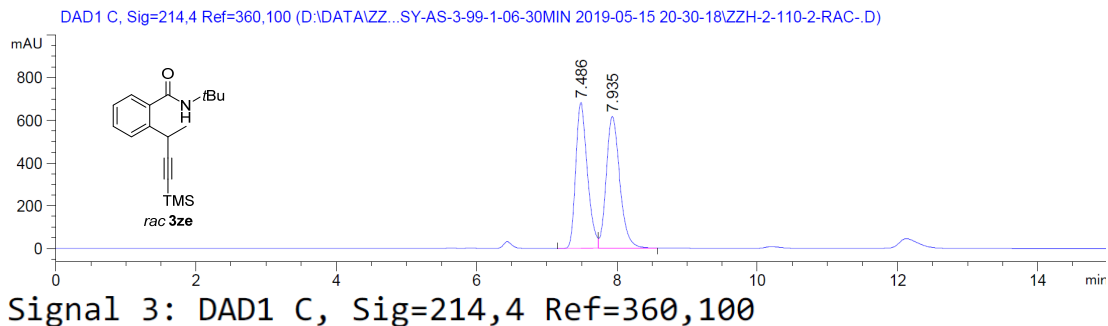

| Peak # | RetTime [min] | Type | Width [min] | Area [mAU*s] | Height [mAU] | Area %  |
|--------|---------------|------|-------------|--------------|--------------|---------|
| 1      | 7.486         | BV   | 0.1795      | 7926.44043   | 682.64960    | 49.0323 |
| 2      | 7.935         | VB   | 0.2061      | 8239.32813   | 615.90424    | 50.9677 |

Totals : 1.61658e4 1298.55383

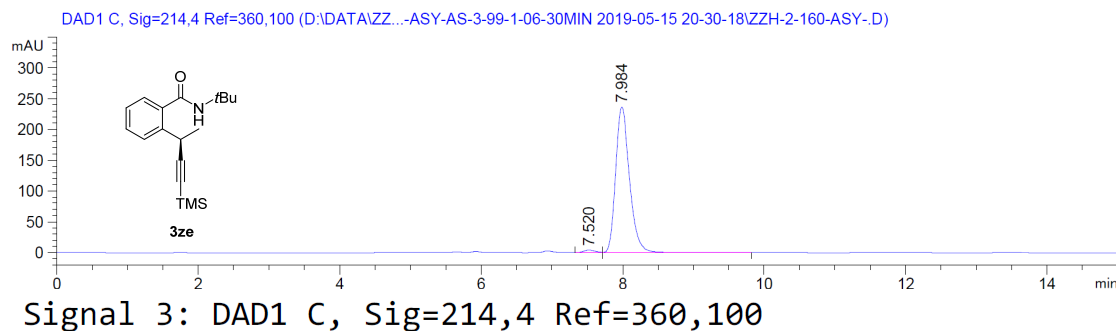

| Peak # | RetTime [min] | Type | Width [min] | Area [mAU*s] | Height [mAU] | Area %  |
|--------|---------------|------|-------------|--------------|--------------|---------|
| 1      | 7.520         | VV   | 0.1778      | 50.25810     | 4.38182      | 1.5313  |
| 2      | 7.984         | VB   | 0.2092      | 3231.69824   | 236.82805    | 98.4687 |

Totals : 3281.95634 241.20987

**Supplementary Figure 213** HPLC spectra for racemic and chiral **3ze**. HPLC analysis: Chiralcel AS3 (*n*-hexane/*i*-PrOH = 99/1, flow rate 0.6 mL/min,  $\lambda = 214$  nm),  $t_R$  (minor) = 7.52 min,  $t_R$  (major) = 7.98 min, 97% ee.

DAD1 B, Sig=254,4 Ref=360,100 (D:\CHEM1\...0-3-34-ASY-98-2-AD-H-08 2019-06-16 17-08-26\ZZH-3-35-1-RAC.D)

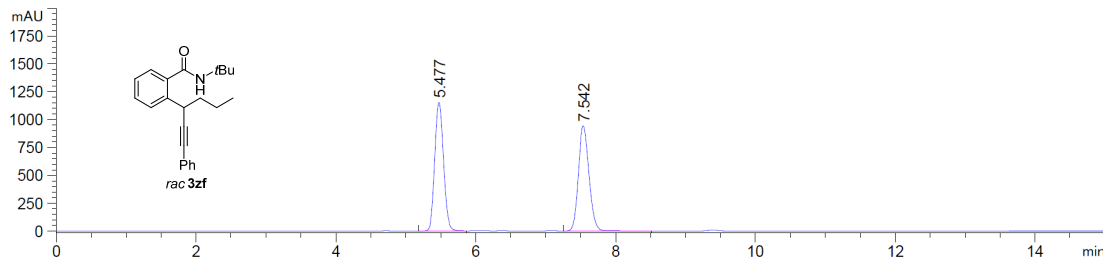

Signal 2: DAD1 B, Sig=254,4 Ref=360,100

| Peak # | RetTime [min] | Type | Width [min] | Area [mAU*s] | Height [mAU] | Area %  |
|--------|---------------|------|-------------|--------------|--------------|---------|
| 1      | 5.477         | BV   | 0.1371      | 9987.53027   | 1153.00891   | 49.8651 |
| 2      | 7.542         | VV   | 0.1682      | 1.00416e4    | 943.48816    | 50.1349 |

Totals : 2.00291e4 2096.49707

DAD1 B, Sig=254,4 Ref=360,100 (D:\CHEM1\...10-3-34-ASY-98-2-AD-H-08 2019-06-16 17-08-26\ZZH-3-33-ASY.D)

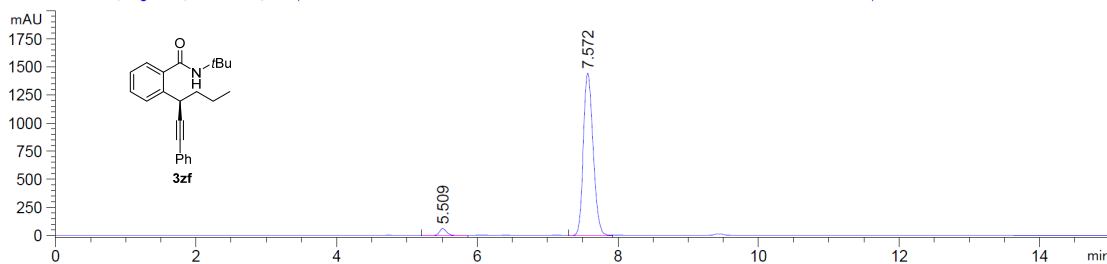

Signal 2: DAD1 B, Sig=254,4 Ref=360,100

| Peak # | RetTime [min] | Type | Width [min] | Area [mAU*s] | Height [mAU] | Area %  |
|--------|---------------|------|-------------|--------------|--------------|---------|
| 1      | 5.509         | BB   | 0.1156      | 443.27203    | 61.83281     | 3.0955  |
| 2      | 7.572         | BV   | 0.1522      | 1.38767e4    | 1442.86646   | 96.9045 |

Totals : 1.43200e4 1504.69927

**Supplementary Figure 214** HPLC spectra for racemic and chiral **3zf**. HPLC analysis: Chiralcel AD-H (*n*-hexane/*i*-PrOH = 90/10, flow rate 0.8 mL/min,  $\lambda$  = 254 nm),  $t_R$  (minor) = 5.51 min,  $t_R$  (major) = 7.57 min, 94% ee.

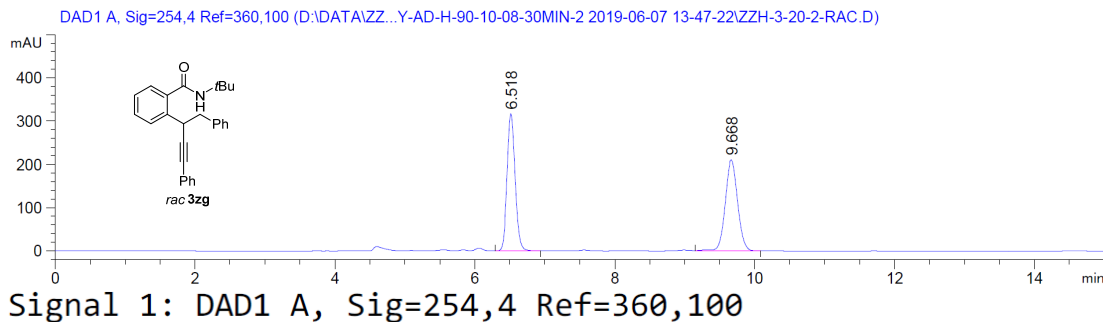

| Peak # | RetTime [min] | Type | Width [min] | Area [mAU*s] | Height [mAU] | Area %  |
|--------|---------------|------|-------------|--------------|--------------|---------|
| 1      | 6.518         | BB   | 0.1226      | 2513.44531   | 316.70026    | 49.2219 |
| 2      | 9.668         | VB   | 0.1896      | 2592.91064   | 210.65535    | 50.7781 |

Totals : 5106.35596 527.35561

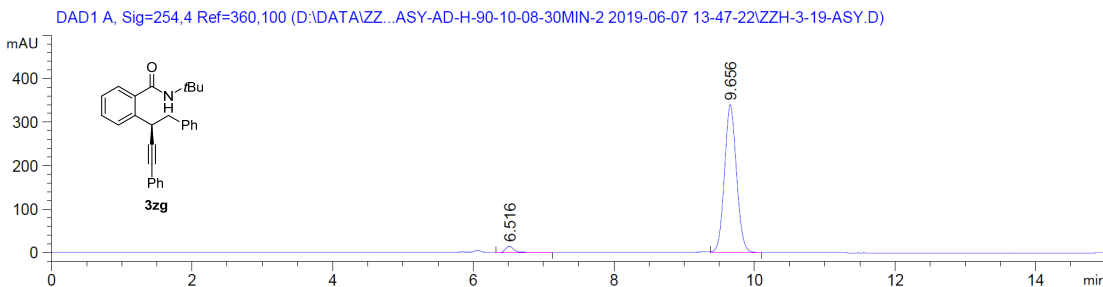

| Peak # | RetTime [min] | Type | Width [min] | Area [mAU*s] | Height [mAU] | Area %  |
|--------|---------------|------|-------------|--------------|--------------|---------|
| 1      | 6.516         | BB   | 0.1278      | 127.23595    | 14.87852     | 3.0367  |
| 2      | 9.656         | VB   | 0.1874      | 4062.74463   | 339.96881    | 96.9633 |

Totals : 4189.98058 354.84733

**Supplementary Figure 215** HPLC spectra for racemic and chiral **3zg**. HPLC analysis: Chiralcel AD-H (*n*-hexane/*i*-PrOH = 90/10, flow rate 0.8 mL/min,  $\lambda$  = 254 nm),  $t_R$  (minor) = 6.52 min,  $t_R$  (major) = 9.66 min, 94% ee.

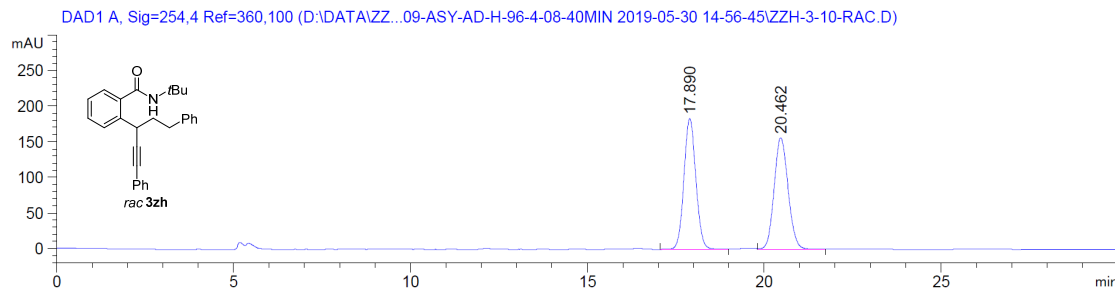

Signal 1: DAD1 A, Sig=254,4 Ref=360,100

| Peak # | RetTime [min] | Type | Width [min] | Area [mAU*s] | Height [mAU] | Area %  |
|--------|---------------|------|-------------|--------------|--------------|---------|
| 1      | 17.890        | BB   | 0.3627      | 4282.02637   | 183.18259    | 50.1923 |
| 2      | 20.462        | BB   | 0.4236      | 4249.21143   | 156.07678    | 49.8077 |

Totals : 8531.23779 339.25937

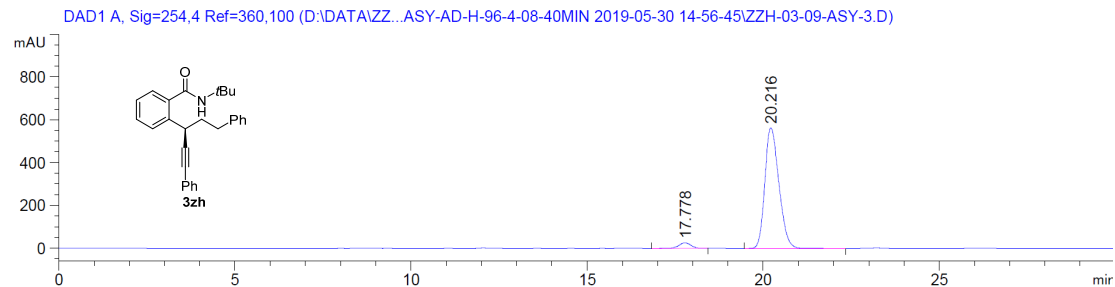

Signal 1: DAD1 A, Sig=254,4 Ref=360,100

| Peak # | RetTime [min] | Type | Width [min] | Area [mAU*s] | Height [mAU] | Area %  |
|--------|---------------|------|-------------|--------------|--------------|---------|
| 1      | 17.778        | BB   | 0.3764      | 649.96436    | 26.47435     | 3.9931  |
| 2      | 20.216        | BB   | 0.4315      | 1.56274e4    | 563.59027    | 96.0069 |

Totals : 1.62774e4 590.06462

**Supplementary Figure 216** HPLC spectra for racemic and chiral **3zh**. HPLC analysis: Chiralcel AD-H (*n*-hexane/*i*-PrOH = 96/4, flow rate 0.8 mL/min,  $\lambda = 254$  nm),  $t_R$  (minor) = 17.78 min,  $t_R$  (major) = 20.22 min, 92% ee.



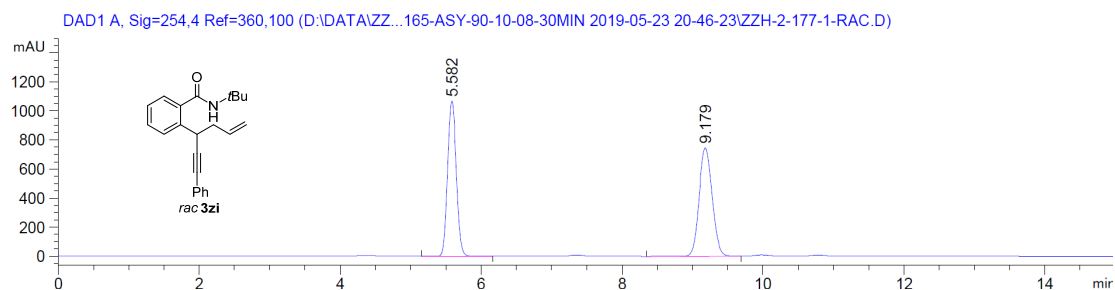

Signal 1: DAD1 A, Sig=254,4 Ref=360,100

| Peak # | RetTime [min] | Type | Width [min] | Area [mAU*s] | Height [mAU] | Area %  |
|--------|---------------|------|-------------|--------------|--------------|---------|
| 1      | 5.582         | BB   | 0.1371      | 9250.52734   | 1067.25024   | 49.1251 |
| 2      | 9.179         | BB   | 0.2020      | 9580.03418   | 745.23218    | 50.8749 |

Totals : 1.88306e4 1812.48242

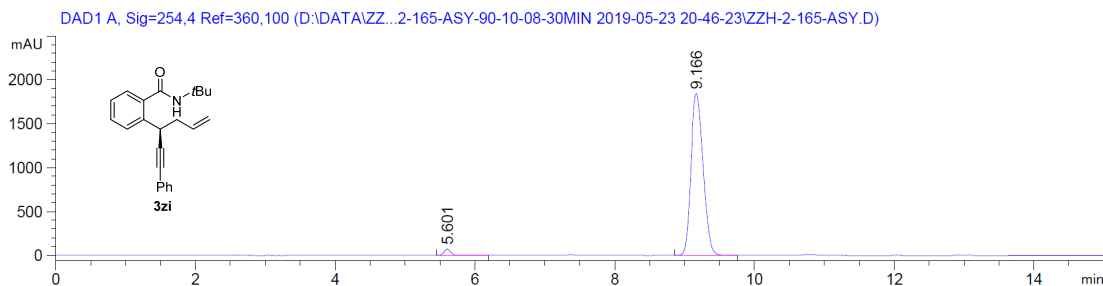

Signal 1: DAD1 A, Sig=254,4 Ref=360,100

| Peak # | RetTime [min] | Type | Width [min] | Area [mAU*s] | Height [mAU] | Area %  |
|--------|---------------|------|-------------|--------------|--------------|---------|
| 1      | 5.601         | VB   | 0.1007      | 476.08694    | 72.37279     | 2.1031  |
| 2      | 9.166         | VV   | 0.1904      | 2.21615e4    | 1842.17822   | 97.8969 |

Totals : 2.26376e4 1914.55101

**Supplementary Figure 217** HPLC spectra for racemic and chiral **3zi**. HPLC analysis: Chiralcel AD-H (*n*-hexane/*i*-PrOH = 90/10, flow rate 0.8 mL/min,  $\lambda$  = 254 nm),  $t_R$  (minor) = 5.60 min,  $t_R$  (major) = 9.17 min, 96% ee.

DAD1 A, Sig=254,4 Ref=360,100 (D:\DATA\ZZ...8-ASY-AD-H-90-10-08-30MIN 2019-06-06 15-07-49\ZZH-3-20-1-RAC.D)

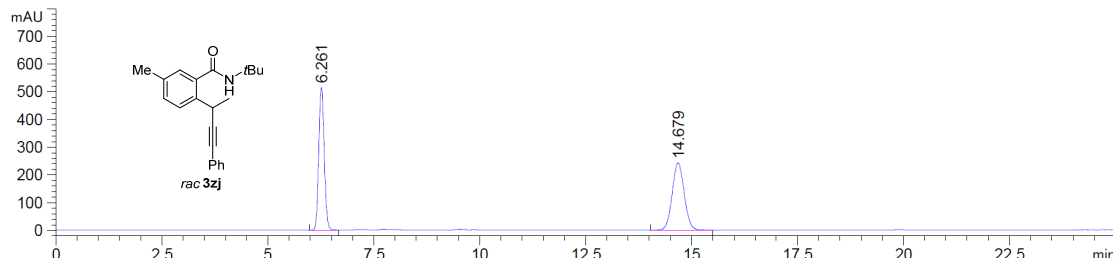

Signal 1: DAD1 A, Sig=254,4 Ref=360,100

| Peak # | RetTime [min] | Type | Width [min] | Area [mAU*s] | Height [mAU] | Area %  |
|--------|---------------|------|-------------|--------------|--------------|---------|
| 1      | 6.261         | BB   | 0.1412      | 4640.98584   | 514.88904    | 49.4506 |
| 2      | 14.679        | BB   | 0.3066      | 4744.10986   | 242.11598    | 50.5494 |

Totals : 9385.09570 757.00502

DAD1 A, Sig=254,4 Ref=360,100 (D:\DATA\ZZ...8-ASY-AD-H-90-10-08-30MIN 2019-06-06 15-07-49\ZZH-3-18-ASY.D)

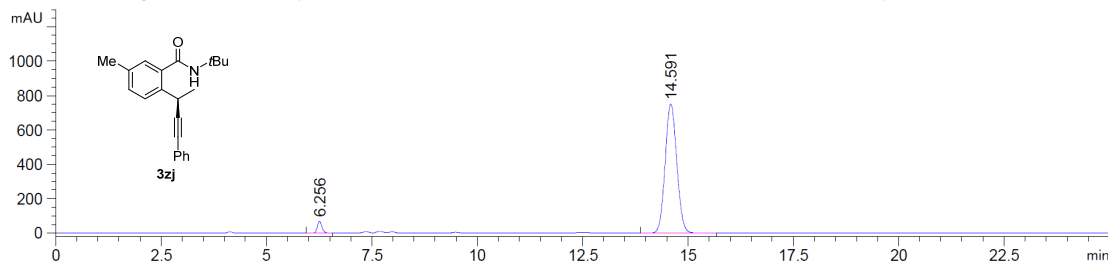

Signal 1: DAD1 A, Sig=254,4 Ref=360,100

| Peak # | RetTime [min] | Type | Width [min] | Area [mAU*s] | Height [mAU] | Area %  |
|--------|---------------|------|-------------|--------------|--------------|---------|
| 1      | 6.256         | BB   | 0.1148      | 517.28705    | 69.49290     | 3.4689  |
| 2      | 14.591        | BB   | 0.3019      | 1.43950e4    | 750.17084    | 96.5311 |

Totals : 1.49123e4 819.66373

**Supplementary Figure 218** HPLC spectra for racemic and chiral **3zj**. HPLC analysis: Chiralcel AD-H (*n*-hexane/*i*-PrOH = 90/10, flow rate 0.8 mL/min,  $\lambda$  = 254 nm),  $t_R$  (minor) = 6.26 min,  $t_R$  (major) = 14.59 min, 93% ee.

DAD1 C, Sig=254.4 Ref=360,100 (DUXUANYID...ASY-ADH-9010-08-30MIN 2019-07-18 23-00-08\DUXY-2-143-1-RAC.D)

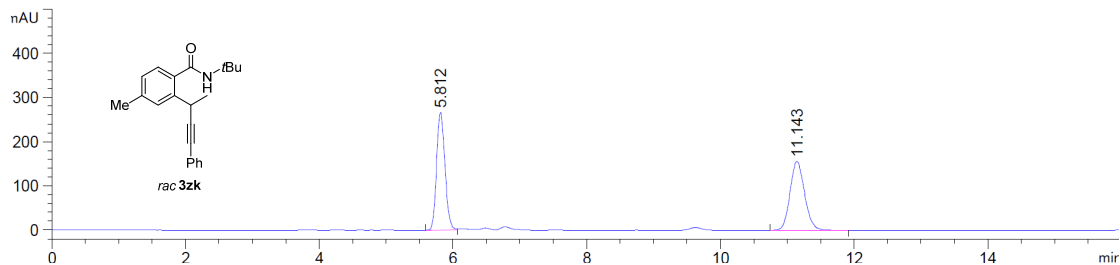

Signal 3: DAD1 C, Sig=254,4 Ref=360,100

| Peak # | RetTime [min] | Type | Width [min] | Area [mAU*s] | Height [mAU] | Area %  |
|--------|---------------|------|-------------|--------------|--------------|---------|
| 1      | 5.812         | BV   | 0.1377      | 2321.93970   | 266.27017    | 49.8250 |
| 2      | 11.143        | BB   | 0.2334      | 2338.25000   | 155.50862    | 50.1750 |

Totals : 4660.18970 421.77879

DAD1 C, Sig=254.4 Ref=360,100 (DUXUANYID...ASY-ADH-9010-08-30MIN 2019-07-18 23-00-08\DUXY-2-142-1-ASY.D)

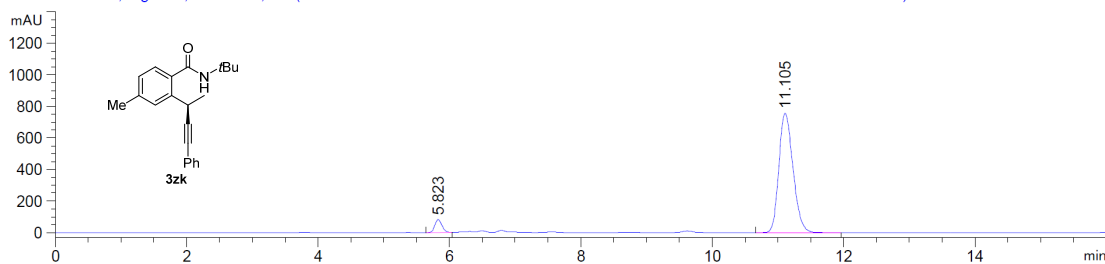

Signal 3: DAD1 C, Sig=254,4 Ref=360,100

| Peak # | RetTime [min] | Type | Width [min] | Area [mAU*s] | Height [mAU] | Area %  |
|--------|---------------|------|-------------|--------------|--------------|---------|
| 1      | 5.823         | BV   | 0.1184      | 624.56110    | 82.46076     | 5.2342  |
| 2      | 11.105        | BB   | 0.2321      | 1.13078e4    | 757.89447    | 94.7658 |

Totals : 1.19323e4 840.35523

**Supplementary Figure 219** HPLC spectra for racemic and chiral **3zk**. HPLC analysis: Chiralcel AD-H (*n*-hexane/*i*-PrOH = 90/10, flow rate 0.8 mL/min,  $\lambda$  = 254 nm),  $t_R$  (minor) = 5.82 min,  $t_R$  (major) = 11.10 min, 90% ee.

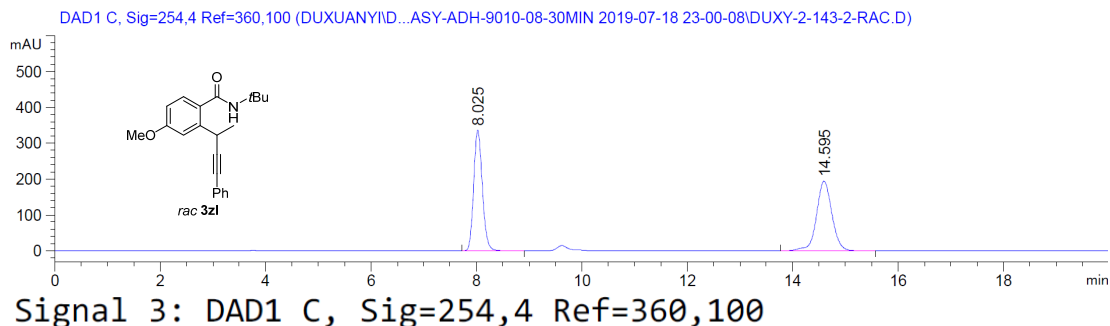

| Peak # | RetTime [min] | Type | Width [min] | Area [mAU*s] | Height [mAU] | Area %  |
|--------|---------------|------|-------------|--------------|--------------|---------|
| 1      | 8.025         | BB   | 0.1768      | 3821.20508   | 335.73892    | 49.3065 |
| 2      | 14.595        | BB   | 0.3127      | 3928.69360   | 193.64345    | 50.6935 |

Totals : 7749.89868 529.38237

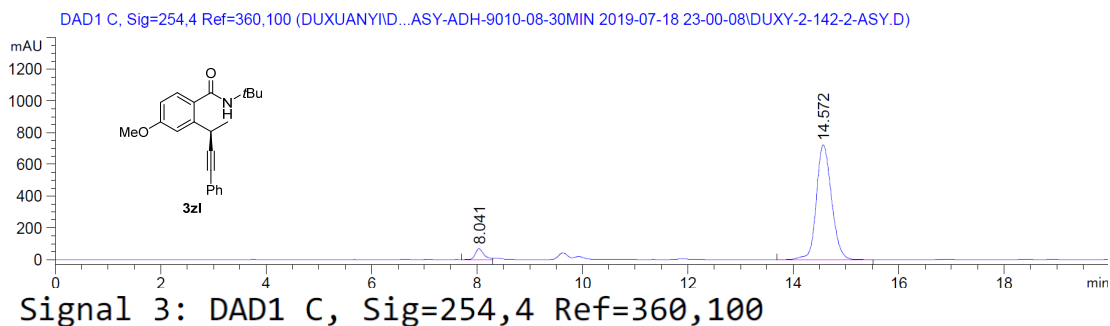

| Peak # | RetTime [min] | Type | Width [min] | Area [mAU*s] | Height [mAU] | Area %  |
|--------|---------------|------|-------------|--------------|--------------|---------|
| 1      | 8.041         | BV   | 0.1667      | 770.25372    | 68.74343     | 5.0804  |
| 2      | 14.572        | BB   | 0.3082      | 1.43911e4    | 723.08429    | 94.9196 |

Totals : 1.51614e4 791.82772

**Supplementary Figure 220** HPLC spectra for racemic and chiral **3zl**. HPLC analysis: Chiralcel AD-H (*n*-hexane/*i*-PrOH = 90/10, flow rate 0.8 mL/min,  $\lambda$  = 254 nm),  $t_R$  (minor) = 8.04 min,  $t_R$  (major) = 14.57 min, 90% ee.

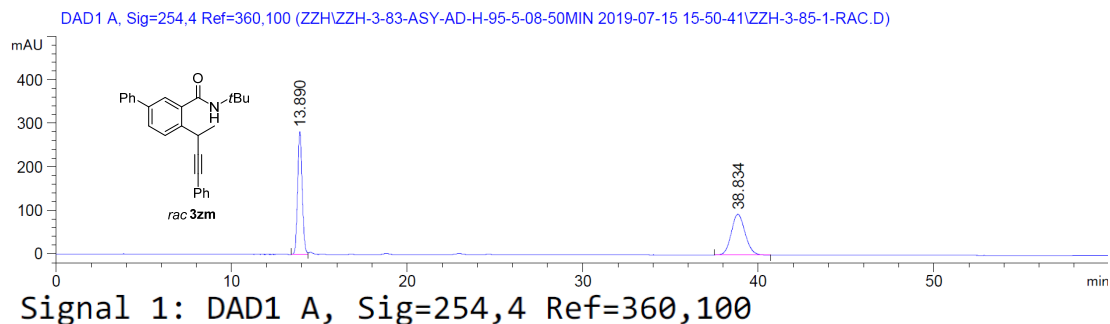

| Peak # | RetTime [min] | Type | Width [min] | Area [mAU*s] | Height [mAU] | Area %  |
|--------|---------------|------|-------------|--------------|--------------|---------|
| 1      | 13.890        | BV   | 0.2793      | 5093.66309   | 281.22104    | 50.0560 |
| 2      | 38.834        | BB   | 0.8311      | 5082.27295   | 93.36119     | 49.9440 |

Totals : 1.01759e4 374.58223

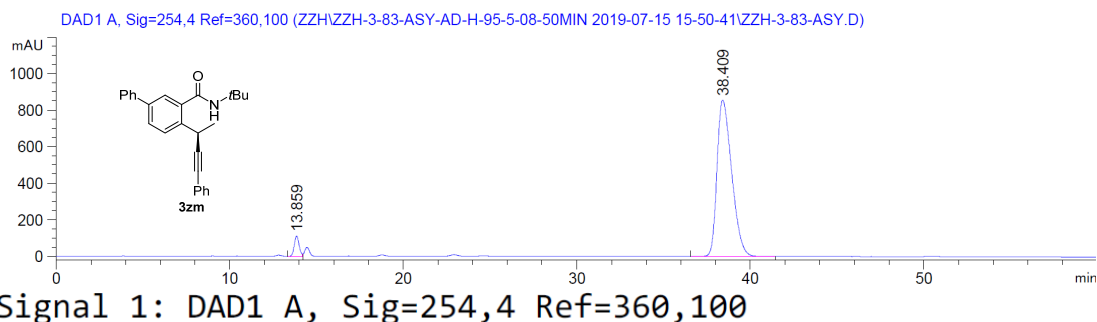

| Peak # | RetTime [min] | Type | Width [min] | Area [mAU*s] | Height [mAU] | Area %  |
|--------|---------------|------|-------------|--------------|--------------|---------|
| 1      | 13.859        | BV   | 0.3070      | 2177.76416   | 110.93793    | 4.1554  |
| 2      | 38.409        | BB   | 0.8829      | 5.02298e4    | 855.58966    | 95.8446 |

Totals : 5.24076e4 966.52759

**Supplementary Figure 221** HPLC spectra for racemic and chiral **3zm**. HPLC analysis: Chiralcel AD-H (*n*-hexane/*i*-PrOH = 95/5, flow rate 0.8 mL/min,  $\lambda = 254$  nm),  $t_R$  (minor) = 13.86 min,  $t_R$  (major) = 38.41 min, 92% ee.

DAD1 A, Sig=254,4 Ref=360,100 (ZZHZZH-3-...ASY-AD-H-90-10-08-20MIN 2019-07-15 14-51-17ZZH-3-85-2-RAC.D)

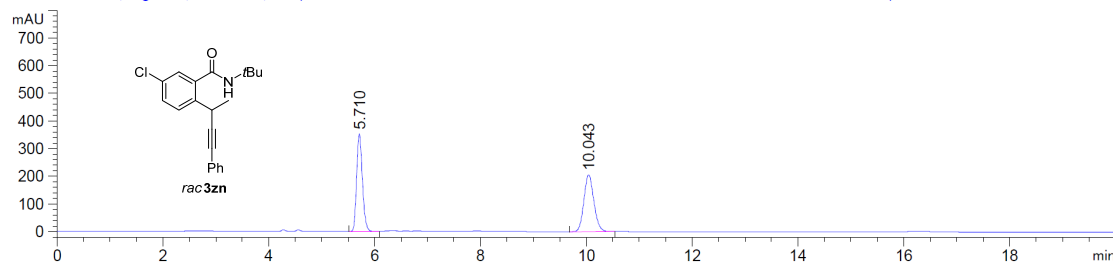

Signal 1: DAD1 A, Sig=254,4 Ref=360,100

| Peak # | RetTime [min] | Type | Width [min] | Area [mAU*s] | Height [mAU] | Area %  |
|--------|---------------|------|-------------|--------------|--------------|---------|
| 1      | 5.710         | BB   | 0.1163      | 2674.99731   | 353.58524    | 49.7163 |
| 2      | 10.043        | BB   | 0.2053      | 2705.52637   | 205.85645    | 50.2837 |

Totals : 5380.52368 559.44168

DAD1 A, Sig=254,4 Ref=360,100 (ZZHZZH-3-84-ASY-AD-H-90-10-08-20MIN 2019-07-15 14-51-17ZZH-3-84-ASY.D)

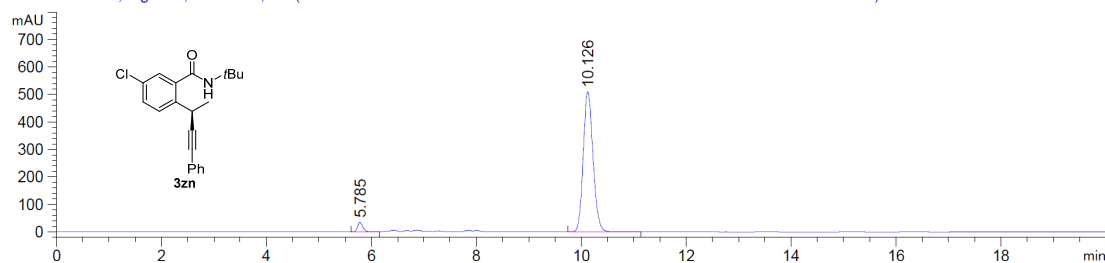

Signal 1: DAD1 A, Sig=254,4 Ref=360,100

| Peak # | RetTime [min] | Type | Width [min] | Area [mAU*s] | Height [mAU] | Area %  |
|--------|---------------|------|-------------|--------------|--------------|---------|
| 1      | 5.785         | BB   | 0.1074      | 240.85872    | 34.54226     | 3.5047  |
| 2      | 10.126        | BB   | 0.2016      | 6631.53076   | 510.18918    | 96.4953 |

Totals : 6872.38948 544.73144

**Supplementary Figure 222** HPLC spectra for racemic and chiral **3zn**. HPLC analysis:

Chiralcel AD-H (*n*-hexane/*i*-PrOH = 90/10, flow rate 0.8 mL/min,  $\lambda$  = 254 nm),  $t_R$  (minor) = 5.79 min,  $t_R$  (major) = 10.13 min, 93% ee.

DAD1 B, Sig=254,4 Ref=360,100 (D:\CHEM1\...3-34-ASY-AD-H-98-2-08 2019-06-16 18-11-58\ZZH-3-35-2-RAC-2.D)

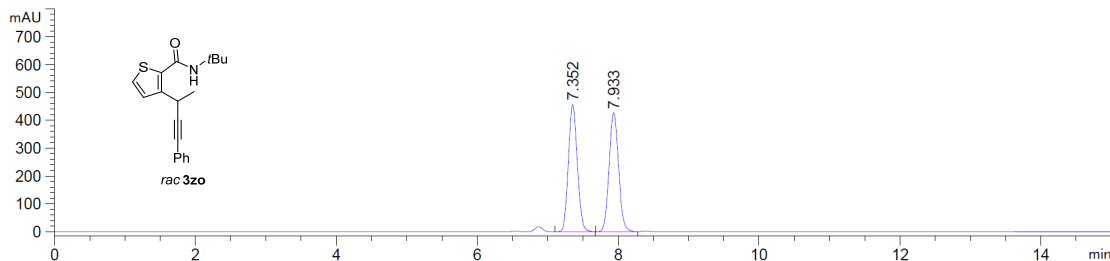

Signal 2: DAD1 B, Sig=254,4 Ref=360,100

| Peak # | RetTime [min] | Type | Width [min] | Area [mAU*s] | Height [mAU] | Area %  |
|--------|---------------|------|-------------|--------------|--------------|---------|
| 1      | 7.352         | BB   | 0.1370      | 3942.03809   | 455.34286    | 49.9680 |
| 2      | 7.933         | BV   | 0.1482      | 3947.08984   | 425.52725    | 50.0320 |

Totals : 7889.12793 880.87012

DAD1 B, Sig=254,4 Ref=360,100 (D:\CHEM1\...H-3-34-ASY-AD-H-98-2-08 2019-06-16 18-11-58\ZZH-3-34-ASY-2.D)

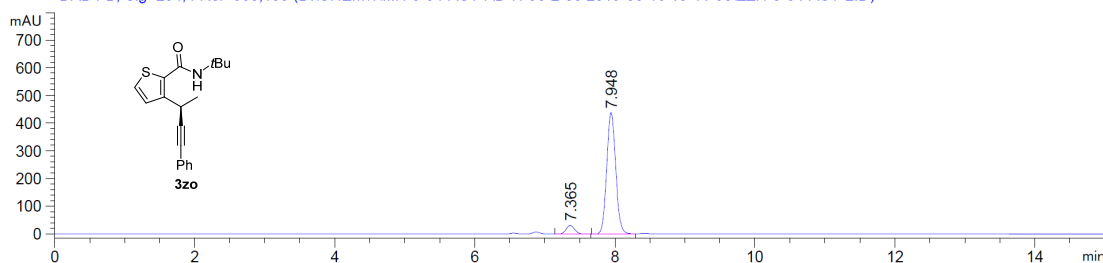

Signal 2: DAD1 B, Sig=254,4 Ref=360,100

| Peak # | RetTime [min] | Type | Width [min] | Area [mAU*s] | Height [mAU] | Area %  |
|--------|---------------|------|-------------|--------------|--------------|---------|
| 1      | 7.365         | BB   | 0.1314      | 257.32443    | 31.45772     | 6.2037  |
| 2      | 7.948         | BV   | 0.1397      | 3890.62354   | 437.50522    | 93.7963 |

Totals : 4147.94797 468.96293

**Supplementary Figure 223** HPLC spectra for racemic and chiral **3zo**. HPLC analysis: Chiralcel AD-H (*n*-hexane/*i*-PrOH = 98/2, flow rate 0.8 mL/min,  $\lambda = 254$  nm),  $t_R$  (minor) = 7.37 min,  $t_R$  (major) = 7.95 min, 88% ee.

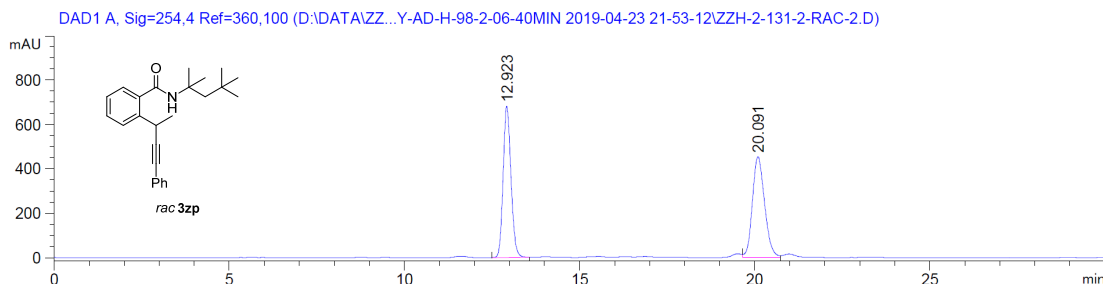

Signal 1: DAD1 A, Sig=254,4 Ref=360,100

| Peak # | RetTime [min] | Type | Width [min] | Area [mAU*s] | Height [mAU] | Area %  |
|--------|---------------|------|-------------|--------------|--------------|---------|
| 1      | 12.923        | BB   | 0.2412      | 1.05707e4    | 680.53595    | 48.9935 |
| 2      | 20.091        | VV   | 0.3769      | 1.10050e4    | 453.78110    | 51.0065 |

Totals : 2.15757e4 1134.31705

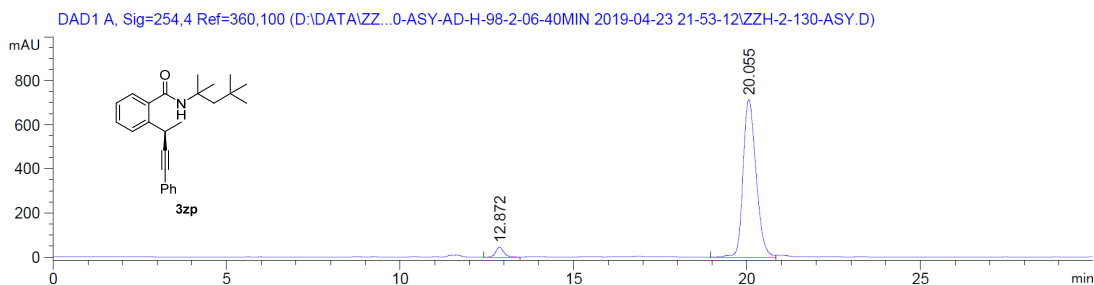

Signal 1: DAD1 A, Sig=254,4 Ref=360,100

| Peak # | RetTime [min] | Type | Width [min] | Area [mAU*s] | Height [mAU] | Area %  |
|--------|---------------|------|-------------|--------------|--------------|---------|
| 1      | 12.872        | BB   | 0.2372      | 684.79474    | 44.57124     | 3.5769  |
| 2      | 20.055        | BV   | 0.4019      | 1.84599e4    | 713.32214    | 96.4231 |

Totals : 1.91447e4 757.89339

**Supplementary Figure 224** HPLC spectra for racemic and chiral **3zp**. HPLC analysis: Chiralcel AD-H (*n*-hexane/*i*-PrOH = 98/2, flow rate 0.8 mL/min,  $\lambda$  = 254 nm),  $t_R$  (minor) = 12.87 min,  $t_R$  (major) = 20.06 min, 93% ee.



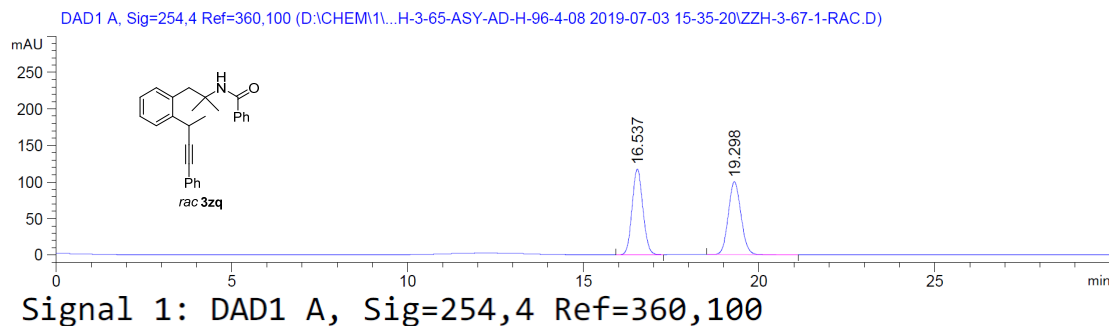

| Peak # | RetTime [min] | Type | Width [min] | Area [mAU*s] | Height [mAU] | Area %  |
|--------|---------------|------|-------------|--------------|--------------|---------|
| 1      | 16.537        | BB   | 0.3304      | 2499.99121   | 117.39439    | 49.8355 |
| 2      | 19.298        | BB   | 0.3892      | 2516.49951   | 100.14473    | 50.1645 |

Totals : 5016.49072 217.53912

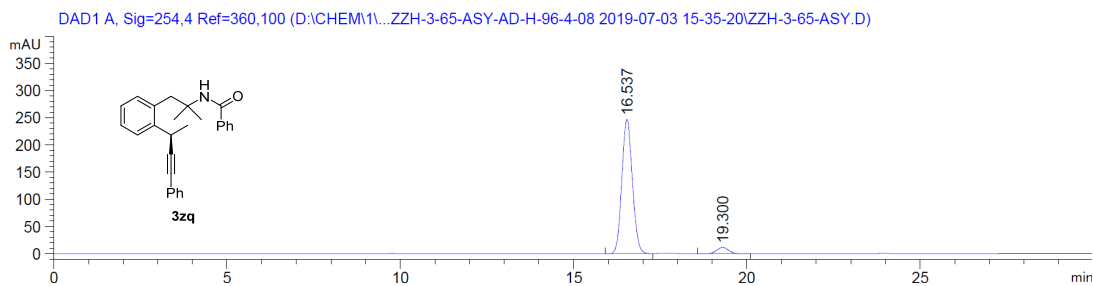

| Peak # | RetTime [min] | Type | Width [min] | Area [mAU*s] | Height [mAU] | Area %  |
|--------|---------------|------|-------------|--------------|--------------|---------|
| 1      | 16.537        | BB   | 0.3290      | 5227.24170   | 246.87074    | 94.6319 |
| 2      | 19.300        | BB   | 0.3789      | 296.52252    | 12.14314     | 5.3681  |

Totals : 5523.76422 259.01388

**Supplementary Figure 225** HPLC spectra for racemic and chiral **3zq**. HPLC analysis: Chiralcel AD-H (*n*-hexane/*i*-PrOH = 96/4, flow rate 0.8 mL/min,  $\lambda$  = 254 nm),  $t_R$  (major) = 16.54 min,  $t_R$  (minor) = 19.30 min, 89% ee.

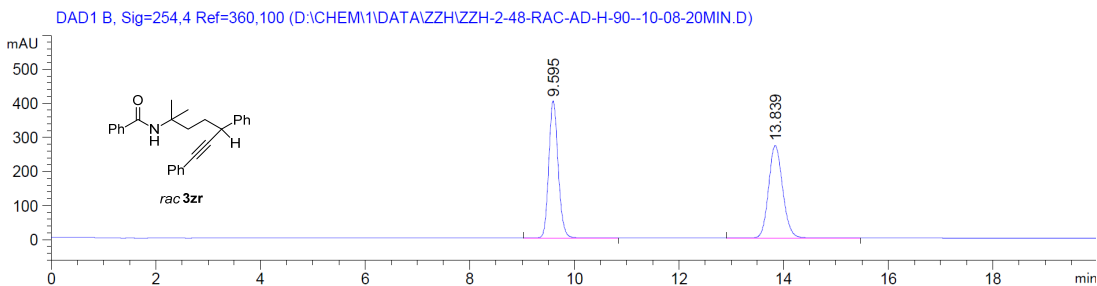

Signal 2: DAD1 B, Sig=254,4 Ref=360,100

| Peak # | RetTime [min] | Type | Width [min] | Area [mAU*s] | Height [mAU] | Area %  |
|--------|---------------|------|-------------|--------------|--------------|---------|
| 1      | 9.595         | VV   | 0.1980      | 5029.87793   | 401.99277    | 49.9012 |
| 2      | 13.839        | BV   | 0.2893      | 5049.78662   | 271.11566    | 50.0988 |

Totals : 1.00797e4 673.10843

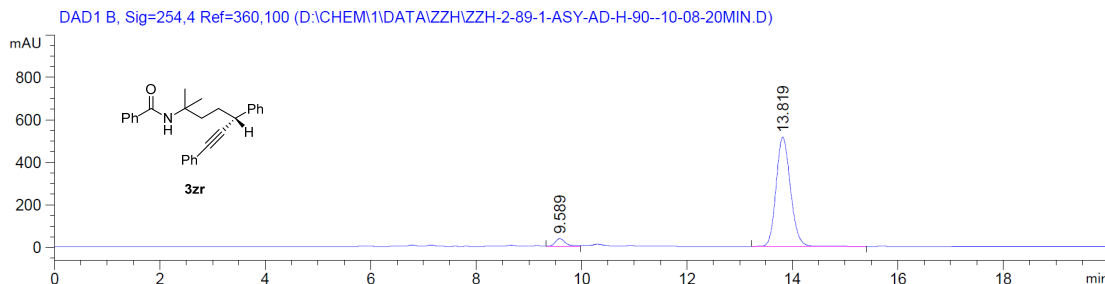

Signal 2: DAD1 B, Sig=254,4 Ref=360,100

| Peak # | RetTime [min] | Type | Width [min] | Area [mAU*s] | Height [mAU] | Area %  |
|--------|---------------|------|-------------|--------------|--------------|---------|
| 1      | 9.589         | BV   | 0.2020      | 474.17163    | 35.91711     | 4.6895  |
| 2      | 13.819        | BV   | 0.2955      | 9637.12305   | 512.21460    | 95.3105 |

Totals : 1.01113e4 548.13171

**Supplementary Figure 226** HPLC spectra for racemic and chiral **3zr**. HPLC analysis: Chiralcel AD-H (*n*-hexane/*i*-PrOH = 90/10, flow rate 0.8 mL/min,  $\lambda = 254$  nm),  $t_R$  (minor) = 9.59 min,  $t_R$  (major) = 13.82 min, 91% ee.

DAD1 A, Sig=254,4 Ref=360,100 (ZZH\ZZH-3-174-1-ASY-AD-3-98-2-08 2019-09-07 12-50-10\ZZH-3-173-1-RAC.D)

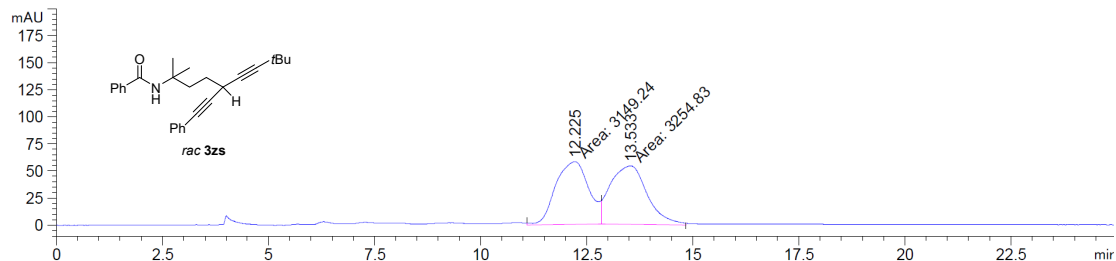

Signal 1: DAD1 A, Sig=254,4 Ref=360,100

| Peak # | RetTime [min] | Type | Width [min] | Area [mAU*s] | Height [mAU] | Area %  |
|--------|---------------|------|-------------|--------------|--------------|---------|
| 1      | 12.225        | MM   | 0.9071      | 3149.24463   | 57.86389     | 49.1756 |
| 2      | 13.533        | MM   | 1.0061      | 3254.83252   | 53.91599     | 50.8244 |

Totals : 6404.07715 111.77988

DAD1 A, Sig=254,4 Ref=360,100 (ZZH\ZZH-3-174-1-ASY-AD-3-98-2-08 2019-09-07 12-50-10\ZZH-3-174-1-ASY.D)

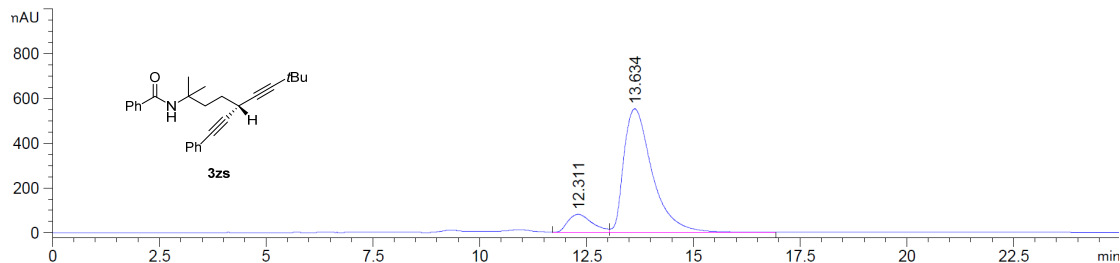

Signal 1: DAD1 A, Sig=254,4 Ref=360,100

| Peak # | RetTime [min] | Type | Width [min] | Area [mAU*s] | Height [mAU] | Area %  |
|--------|---------------|------|-------------|--------------|--------------|---------|
| 1      | 12.311        | BV   | 0.6122      | 3121.80127   | 79.49506     | 10.9177 |
| 2      | 13.634        | VB   | 0.7138      | 2.54722e4    | 550.57019    | 89.0823 |

Totals : 2.85940e4 630.06525

**Supplementary Figure 227** HPLC spectra for racemic and chiral **3zs**. HPLC analysis: Chiralcel AD3 (*n*-hexane/*i*-PrOH = 98/2, flow rate 0.8 mL/min,  $\lambda$  = 254 nm),  $t_R$  (minor) = 13.31 min,  $t_R$  (major) = 13.63 min, 78% ee.

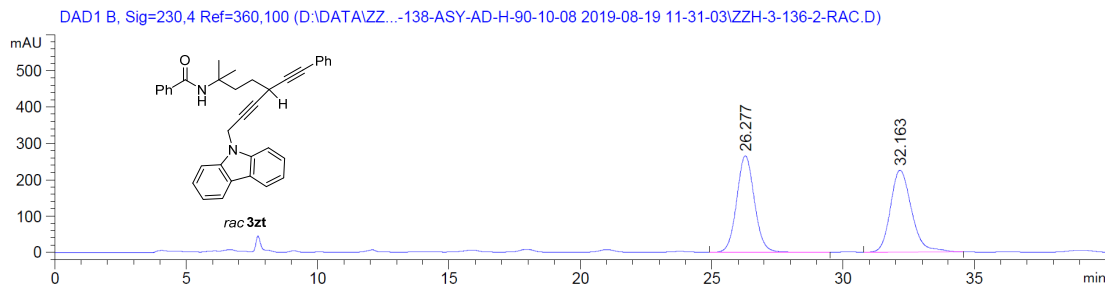

Signal 2: DAD1 B, Sig=230,4 Ref=360,100

| Peak # | RetTime [min] | Type | Width [min] | Area [mAU*s] | Height [mAU] | Area %  |
|--------|---------------|------|-------------|--------------|--------------|---------|
| 1      | 26.277        | BB   | 0.7259      | 1.24698e4    | 265.50247    | 49.8599 |
| 2      | 32.163        | BB   | 0.8607      | 1.25399e4    | 225.50816    | 50.1401 |

Totals : 2.50096e4 491.01064

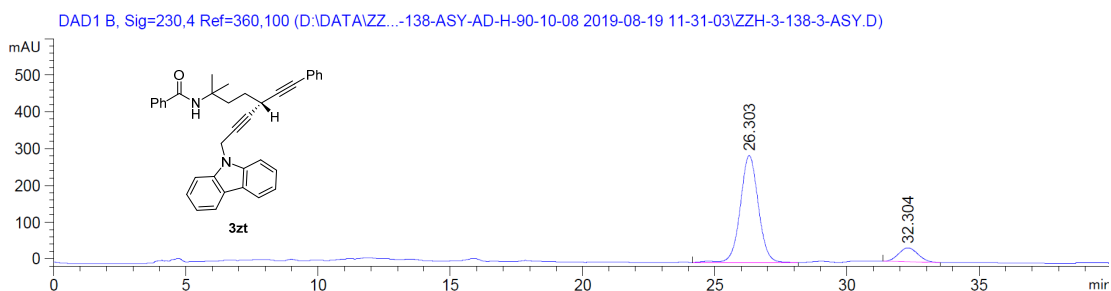

Signal 2: DAD1 B, Sig=230,4 Ref=360,100

| Peak # | RetTime [min] | Type | Width [min] | Area [mAU*s] | Height [mAU] | Area %  |
|--------|---------------|------|-------------|--------------|--------------|---------|
| 1      | 26.303        | BB   | 0.7277      | 1.37594e4    | 290.98029    | 87.6642 |
| 2      | 32.304        | BB   | 0.8036      | 1936.18591   | 38.05697     | 12.3358 |

Totals : 1.56956e4 329.03725

**Supplementary Figure 228** HPLC spectra for racemic and chiral **3zt**. HPLC analysis: Chiralcel AD-H (*n*-hexane/*i*-PrOH = 90/10, flow rate 0.8 mL/min,  $\lambda = 230$  nm),  $t_R$  (major) = 26.30 min,  $t_R$  (minor) = 32.30 min, 75% ee.

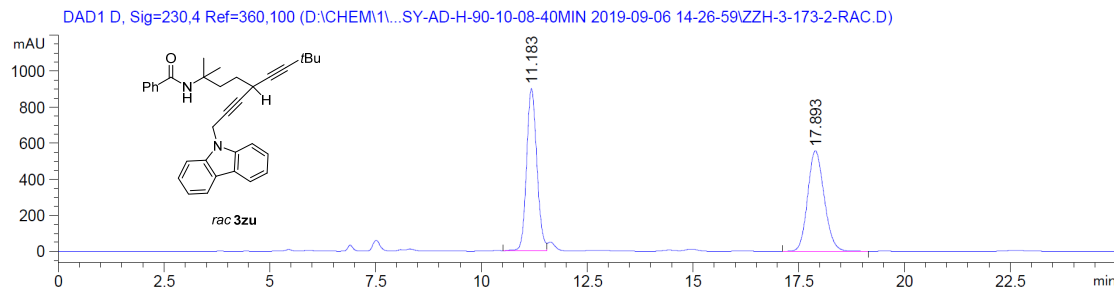

Signal 4: DAD1 D, Sig=230,4 Ref=360,100

| Peak # | RetTime [min] | Type | Width [min] | Area [mAU*s] | Height [mAU] | Area %  |
|--------|---------------|------|-------------|--------------|--------------|---------|
| 1      | 11.183        | VV   | 0.2626      | 1.53298e4    | 900.45593    | 50.3546 |
| 2      | 17.893        | BB   | 0.4205      | 1.51138e4    | 557.18671    | 49.6454 |

Totals : 3.04436e4 1457.64264

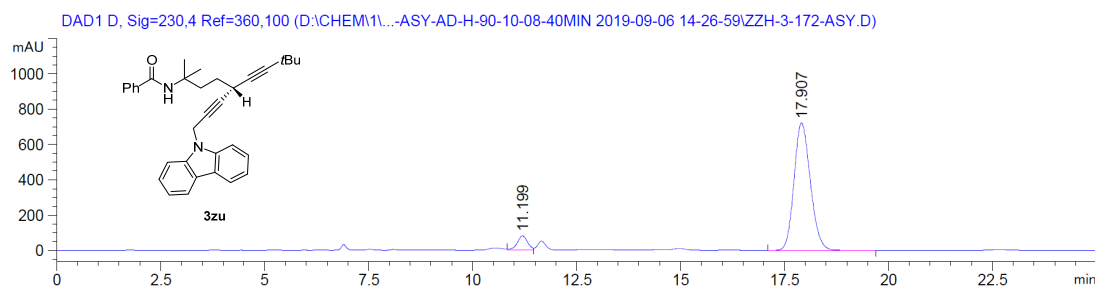

Signal 4: DAD1 D, Sig=230,4 Ref=360,100

| Peak # | RetTime [min] | Type | Width [min] | Area [mAU*s] | Height [mAU] | Area %  |
|--------|---------------|------|-------------|--------------|--------------|---------|
| 1      | 11.199        | VV   | 0.2689      | 1408.55432   | 80.19509     | 6.6620  |
| 2      | 17.907        | BB   | 0.4256      | 1.97344e4    | 720.48608    | 93.3380 |

Totals : 2.11430e4 800.68118

**Supplementary Figure 229** HPLC spectra for racemic and chiral **3zu**. HPLC analysis: Chiralcel AD-H (*n*-hexane/*i*-PrOH = 90/10, flow rate 0.8 mL/min,  $\lambda = 230$  nm),  $t_R$  (minor) = 11.20 min,  $t_R$  (major) = 17.91 min, 87% ee.

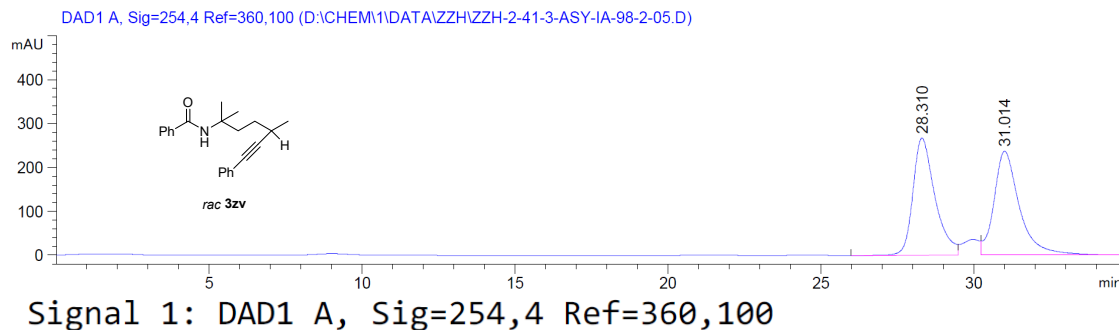

| Peak # | RetTime [min] | Type | Width [min] | Area [mAU*s] | Height [mAU] | Area %  |
|--------|---------------|------|-------------|--------------|--------------|---------|
| 1      | 28.310        | BV   | 0.7529      | 1.34369e4    | 267.11981    | 49.3258 |
| 2      | 31.014        | VBA  | 0.8636      | 1.38042e4    | 236.98091    | 50.6742 |

Totals : 2.72412e4 504.10072

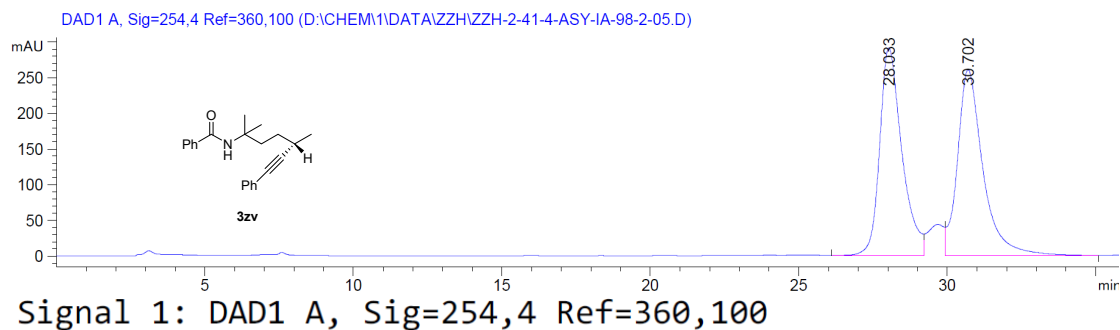

| Peak # | RetTime [min] | Type | Width [min] | Area [mAU*s] | Height [mAU] | Area %  |
|--------|---------------|------|-------------|--------------|--------------|---------|
| 1      | 28.033        | BV   | 0.7756      | 1.51256e4    | 291.38507    | 49.3574 |
| 2      | 30.702        | VB   | 0.8790      | 1.55195e4    | 260.51135    | 50.6426 |

Totals : 3.06452e4 551.89642

**Supplementary Figure 230** HPLC spectra for racemic and chiral **3zv**. HPLC analysis: Chiralcel IA (*n*-hexane/*i*-PrOH = 98/2, flow rate 0.8 mL/min,  $\lambda$  = 254 nm),  $t_R$  (minor) = 28.03 min,  $t_R$  (major) = 30.70 min, 0% ee.

DAD1 B, Sig=254,4 Ref=360,100 (ZZHZZH-3-160-2-ASY-98-2-08-AD-H 2019-08-30 17-34-07ZZH-3-160-1-RAC.D)

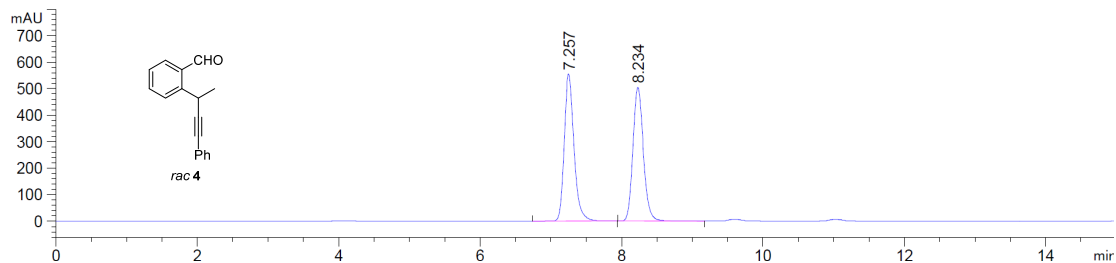

Signal 2: DAD1 B, Sig=254,4 Ref=360,100

| Peak # | RetTime [min] | Type | Width [min] | Area [mAU*s] | Height [mAU] | Area %  |
|--------|---------------|------|-------------|--------------|--------------|---------|
| 1      | 7.257         | BB   | 0.1530      | 5367.48486   | 554.18671    | 50.9526 |
| 2      | 8.234         | BV   | 0.1638      | 5166.77881   | 503.35782    | 49.0474 |

Totals : 1.05343e4 1057.54453

DAD1 B, Sig=254,4 Ref=360,100 (ZZHZZH-3-160-2-ASY-AD-H-90-10-08.D)

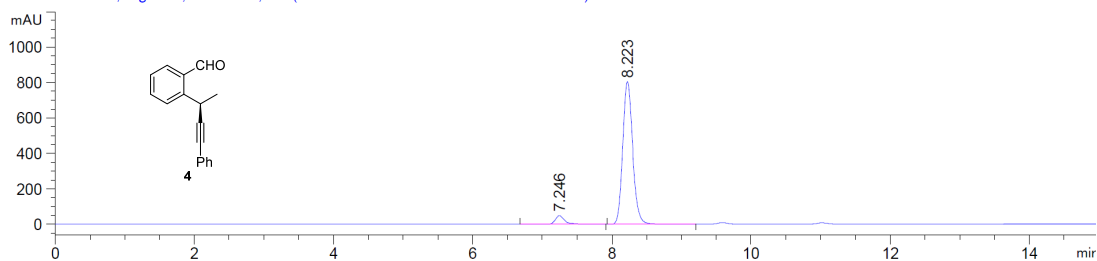

Signal 2: DAD1 B, Sig=254,4 Ref=360,100

| Peak # | RetTime [min] | Type | Width [min] | Area [mAU*s] | Height [mAU] | Area %  |
|--------|---------------|------|-------------|--------------|--------------|---------|
| 1      | 7.246         | BB   | 0.1478      | 480.85794    | 50.19764     | 5.6807  |
| 2      | 8.223         | BV   | 0.1519      | 7983.93896   | 803.61041    | 94.3193 |

Totals : 8464.79691 853.80806

**Supplementary Figure 231** HPLC spectra for racemic and chiral **4**. HPLC analysis: Chiralcel AD-H (*n*-hexane/*i*-PrOH = 90/10, flow rate 0.8 mL/min,  $\lambda = 254$  nm),  $t_R$  (minor) = 7.25 min,  $t_R$  (major) = 8.22 min, 89% ee.

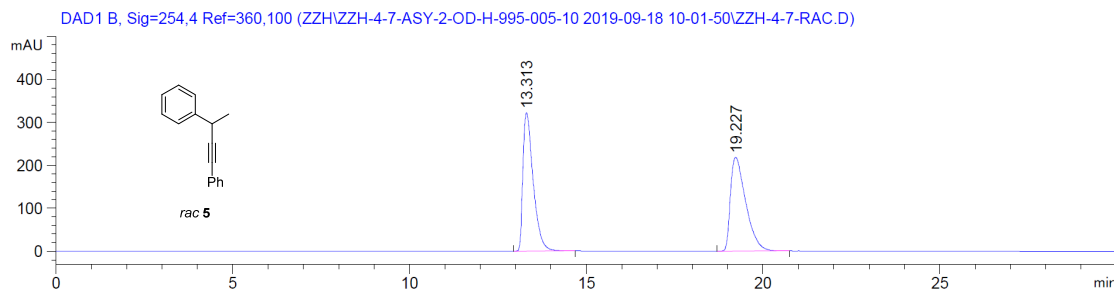

Signal 2: DAD1 B, Sig=254,4 Ref=360,100

| Peak # | RetTime [min] | Type | Width [min] | Area [mAU*s] | Height [mAU] | Area %  |
|--------|---------------|------|-------------|--------------|--------------|---------|
| 1      | 13.313        | BB   | 0.3076      | 6513.43213   | 322.48468    | 49.7764 |
| 2      | 19.227        | BB   | 0.4488      | 6571.94531   | 218.56802    | 50.2236 |

Totals : 1.30854e4 541.05270

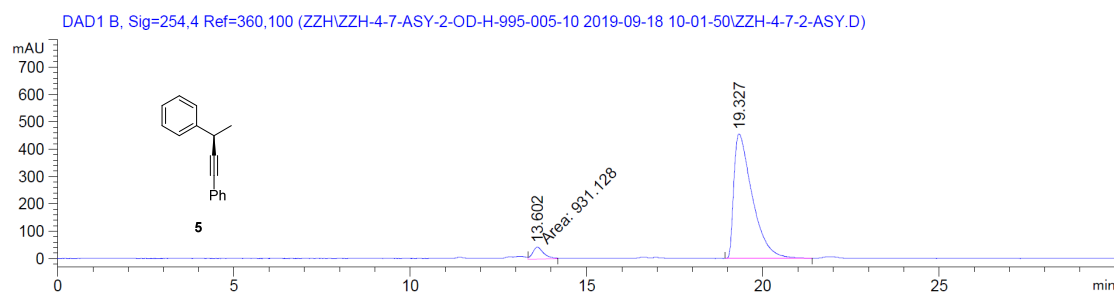

Signal 2: DAD1 B, Sig=254,4 Ref=360,100

| Peak # | RetTime [min] | Type | Width [min] | Area [mAU*s] | Height [mAU] | Area %  |
|--------|---------------|------|-------------|--------------|--------------|---------|
| 1      | 13.602        | MM   | 0.3598      | 931.12799    | 43.13540     | 5.3580  |
| 2      | 19.327        | BB   | 0.5217      | 1.64473e4    | 455.01566    | 94.6420 |

Totals : 1.73784e4 498.15106

**Supplementary Figure 232** HPLC spectra for racemic and chiral **5**. HPLC analysis: Chiralcel OD-H (*n*-hexane/*i*-PrOH = 99.5/0.5, flow rate 1.0 mL/min,  $\lambda$  = 254 nm),  $t_R$  (minor) = 13.60 min,  $t_R$  (major) = 19.33 min, 89% ee.



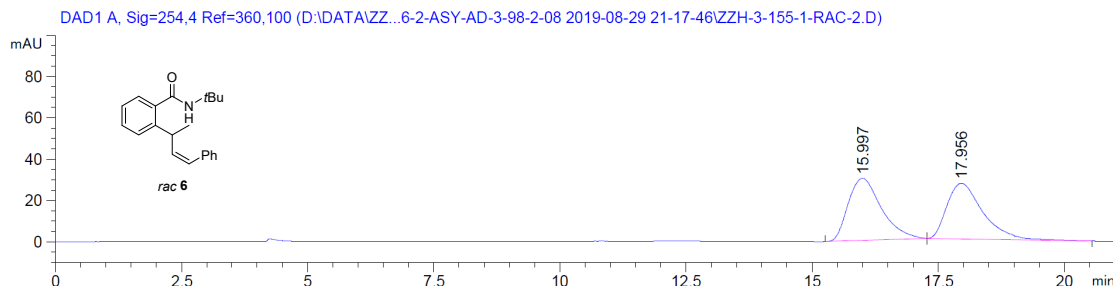

Signal 1: DAD1 A, Sig=254,4 Ref=360,100

| Peak # | RetTime [min] | Type | Width [min] | Area [mAU*s] | Height [mAU] | Area %  |
|--------|---------------|------|-------------|--------------|--------------|---------|
| 1      | 15.997        | BB   | 0.7107      | 1372.46777   | 30.05979     | 50.6360 |
| 2      | 17.956        | BB   | 0.7599      | 1337.98816   | 26.91745     | 49.3640 |

Totals : 2710.45593 56.97723

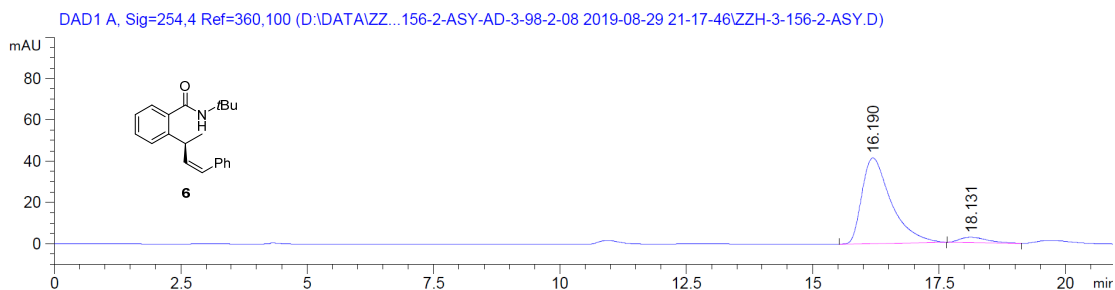

Signal 1: DAD1 A, Sig=254,4 Ref=360,100

| Peak # | RetTime [min] | Type | Width [min] | Area [mAU*s] | Height [mAU] | Area %  |
|--------|---------------|------|-------------|--------------|--------------|---------|
| 1      | 16.190        | BB   | 0.6033      | 1660.53430   | 41.45330     | 94.4607 |
| 2      | 18.131        | BB   | 0.5127      | 97.37547     | 2.62540      | 5.5393  |

Totals : 1757.90977 44.07869

**Supplementary Figure 233** HPLC spectra for racemic and chiral **6**. HPLC analysis: Chiralcel AD3 (*n*-hexane/*i*-PrOH = 98/2, flow rate 0.8 mL/min,  $\lambda$  = 254 nm),  $t_R$  (minor) = 16.19 min,  $t_R$  (major) = 18.13 min, 89% ee.

DAD1 C, Sig=214.4 Ref=360,100 (D:\DATA\ZZ...-3-126-ASY-AD-H-90-10-08 2019-08-07 22-12-14\ZZH-2-107-RAC.D)

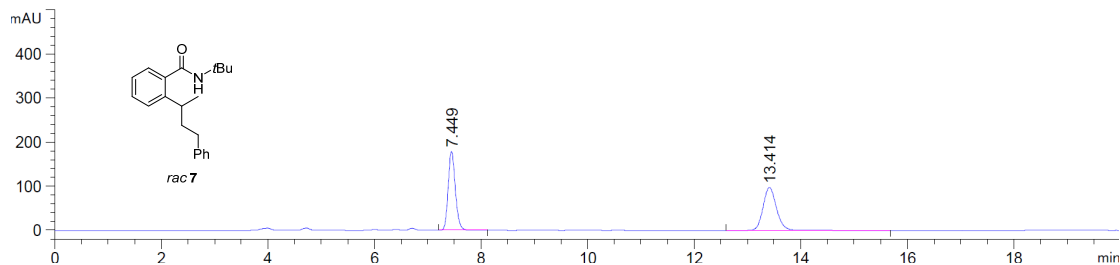

Signal 3: DAD1 C, Sig=214,4 Ref=360,100

| Peak # | RetTime [min] | Type | Width [min] | Area [mAU*s] | Height [mAU] | Area %  |
|--------|---------------|------|-------------|--------------|--------------|---------|
| 1      | 7.449         | BV   | 0.1450      | 1669.81152   | 178.74265    | 49.6147 |
| 2      | 13.414        | BB   | 0.2674      | 1695.74951   | 97.26457     | 50.3853 |

Totals : 3365.56104 276.00722

DAD1 C, Sig=214.4 Ref=360,100 (D:\DATA\ZZ...-126-ASY-AD-H-90-10-08 2019-08-07 22-12-14\ZZH-3-126-ASY-3.D)

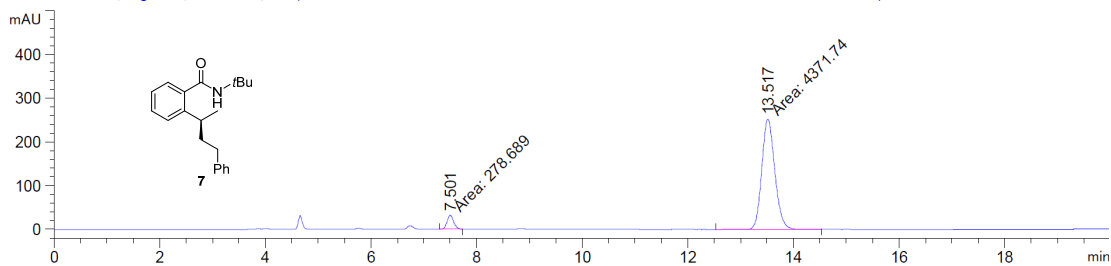

Signal 3: DAD1 C, Sig=214,4 Ref=360,100

| Peak # | RetTime [min] | Type | Width [min] | Area [mAU*s] | Height [mAU] | Area %  |
|--------|---------------|------|-------------|--------------|--------------|---------|
| 1      | 7.501         | MM   | 0.1449      | 278.68906    | 32.05468     | 5.9928  |
| 2      | 13.517        | MM   | 0.2882      | 4371.73779   | 252.79807    | 94.0072 |

Totals : 4650.42685 284.85275

**Supplementary Figure 234** HPLC spectra for racemic and chiral 7. HPLC analysis: Chiralcel AD-H (*n*-hexane/*i*-PrOH = 90/10, flow rate 0.8 mL/min,  $\lambda = 214$  nm),  $t_R$  (minor) = 7.50 min,  $t_R$  (major) = 13.52 min, 88% ee.

DAD1 C, Sig=214,4 Ref=360,100 (D:\DATA\ZZH\ZZH-3-98-ASY-OD-3-98-2-08 2019-09-18 21-25-33\ZZH-2-98-RAC.D)

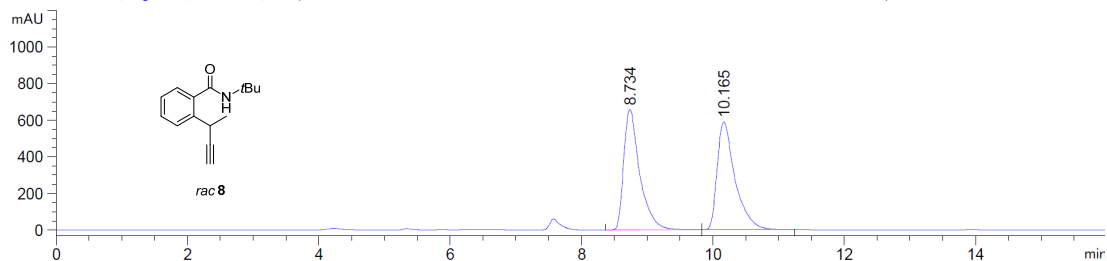

Signal 3: DAD1 C, Sig=214,4 Ref=360,100

| Peak # | RetTime [min] | Type | Width [min] | Area [mAU*s] | Height [mAU] | Area %  |
|--------|---------------|------|-------------|--------------|--------------|---------|
| 1      | 8.734         | BB   | 0.2538      | 1.11358e4    | 656.71204    | 49.9839 |
| 2      | 10.165        | BB   | 0.2828      | 1.11429e4    | 588.80389    | 50.0161 |

Totals : 2.22787e4 1245.51593

DAD1 C, Sig=214,4 Ref=360,100 (D:\DATA\ZZH\ZZH-3-98-ASY-OD-3-98-2-08 2019-09-18 21-25-33\ZZH-2-98-ASY.D)

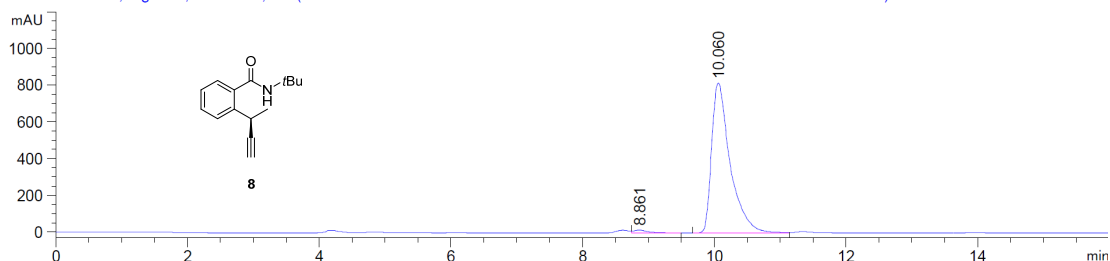

Signal 3: DAD1 C, Sig=214,4 Ref=360,100

| Peak # | RetTime [min] | Type | Width [min] | Area [mAU*s] | Height [mAU] | Area %  |
|--------|---------------|------|-------------|--------------|--------------|---------|
| 1      | 8.861         | VB   | 0.2127      | 225.50345    | 15.23015     | 1.4011  |
| 2      | 10.060        | BV   | 0.2891      | 1.58697e4    | 815.42804    | 98.5989 |

Totals : 1.60952e4 830.65819

**Supplementary Figure 235** HPLC spectra for racemic and chiral **8**. HPLC analysis: Chiralcel OD-3 (*n*-hexane/*i*-PrOH = 98/2, flow rate 0.8 mL/min,  $\lambda$  = 214 nm),  $t_R$  (minor) = 8.86 min,  $t_R$  (major) = 10.06 min, 97% ee.

DAD1 A, Sig=254,4 Ref=360,100 (D:\DATA\ZZ...9-ASY-OZ-3-80-20-08-30MIN 2019-06-30 19-20-49\ZZH-3-60-RAC.D)

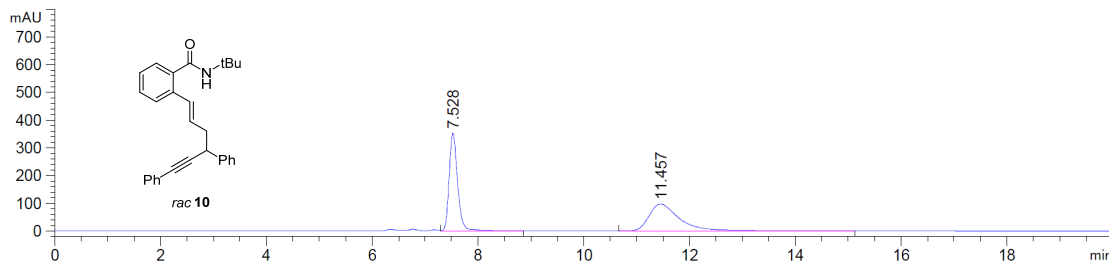

Signal 1: DAD1 A, Sig=254,4 Ref=360,100

| Peak # | RetTime [min] | Type | Width [min] | Area [mAU*s] | Height [mAU] | Area %  |
|--------|---------------|------|-------------|--------------|--------------|---------|
| 1      | 7.528         | VB   | 0.1675      | 3847.63843   | 352.16974    | 50.1541 |
| 2      | 11.457        | BB   | 0.5948      | 3823.98901   | 96.39348     | 49.8459 |

Totals : 7671.62744 448.56322

DAD1 A, Sig=254,4 Ref=360,100 (D:\DATA\ZZ...ASY-OZ-3-80-20-08-30MIN 2019-06-30 19-20-49\ZZH-3-59-ASY-2.D)

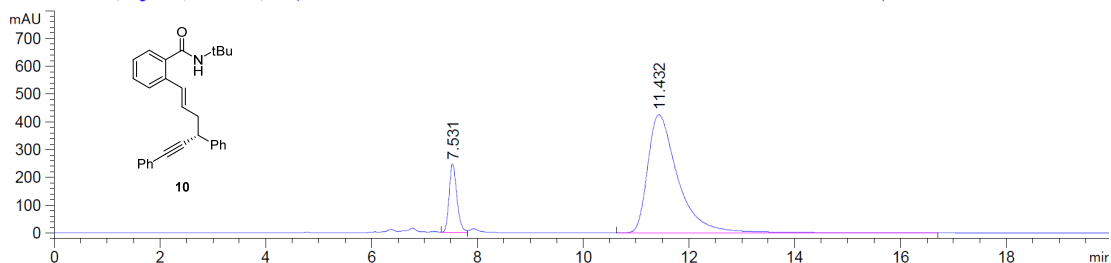

Signal 1: DAD1 A, Sig=254,4 Ref=360,100

| Peak # | RetTime [min] | Type | Width [min] | Area [mAU*s] | Height [mAU] | Area %  |
|--------|---------------|------|-------------|--------------|--------------|---------|
| 1      | 7.531         | BV   | 0.1574      | 2524.48267   | 246.66464    | 13.0781 |
| 2      | 11.432        | BB   | 0.5902      | 1.67786e4    | 425.35782    | 86.9219 |

Totals : 1.93031e4 672.02246

**Supplementary Figure 236** HPLC spectra for racemic and chiral **10**. HPLC analysis: Chiralcel OZ3 (*n*-hexane/*i*-PrOH = 80/20, flow rate 0.8 mL/min,  $\lambda$  = 254 nm),  $t_R$  (minor) = 7.53 min,  $t_R$  (major) = 11.43 min, 74% ee.

## Supplementary Methods

Most of reactions were carried out under argon atmosphere using Schlenk techniques. Reagents were purchased at the highest commercial quality and used without further purification, unless otherwise stated. CuI was purchased from Sigma-Aldrich. Analytical thin layer chromatography (TLC) was performed on precoated silica gel 60 GF254 plates. Flash column chromatography was performed using Tsingdao silica gel (60, particle size 0.040–0.063 mm). Visualization on TLC was achieved by use of UV light (254 nm) or iodine. NMR spectra were recorded on Bruker DRX-400 and DPX-500 spectrometers at 400 or 500 MHz for  $^1\text{H}$  NMR, 100 or 125 MHz for  $^{13}\text{C}$  NMR and 376 MHz for  $^{19}\text{F}$  NMR, respectively, in  $\text{CDCl}_3$  with tetramethylsilane (TMS) as internal standard. The chemical shifts are expressed in ppm and coupling constants are given in Hz. Data for  $^1\text{H}$  NMR are recorded as follows: chemical shift (ppm), multiplicity (s, singlet; d, doublet; t, triplet; q, quarter; p, pentet, m, multiplet; br, broad), coupling constant (Hz), integration. Data for  $^{13}\text{C}$  NMR are reported in terms of chemical shift ( $\delta$ , ppm). Mass spectrometric data were obtained using Bruker Apex IV RTMS. Enantiomeric excess (ee) was determined using Agilent high-performance liquid chromatography (HPLC) with a Hatachi detector (at appropriate wavelength). Column conditions are reported in the experimental section below. Specific optical rotation was measured on a Rudolph-Autopol I.

## General synthesis of *N*-(*tert*-butyl)benzamides S-1a–S-1l.

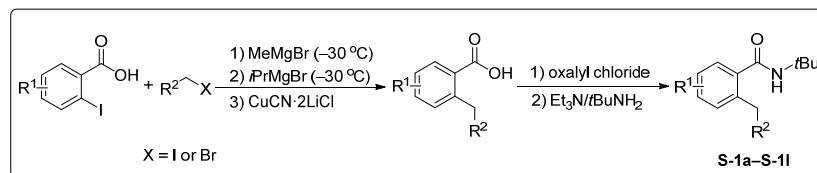

### Supplementary Figure 237 General synthesis of *N*-(*tert*-butyl)benzamides S-1a–S-1l

According to the literature procedures.<sup>5,6</sup>

To a stirred solution of 2-iodobenzoic acid in THF (0.33 M) in an oven-dried flask was added MeMgBr (1 equiv.) at  $-30\text{ }^{\circ}\text{C}$  under argon and the reaction mixture was stirred under the same conditions for 5 mins. Next, *i*PrMgCl (1.2 equiv.) was added slowly and the stirring was continued under the same conditions for another 1 h. Then, the reaction mixture was cooled to  $-40\text{ }^{\circ}\text{C}$  and a solution of CuCN·2LiCl in THF (5 mol%, 0.34 M) was added slowly. The reaction mixture was stirred for 10 mins while being warmed to  $-30\text{ }^{\circ}\text{C}$ . Subsequently, alkyl bromide or alkyl iodide (3.0 equiv.) was added in one portion and the reaction was allowed to warm to ambient temperature overnight while stirring. Upon completion, the reaction was diluted with EtOAc, acidified with 1 M HCl to pH = 3, and extracted with EtOAc. The combined organic layers were washed with brine and dried over Na<sub>2</sub>SO<sub>4</sub>. The crude mixture was concentrated and purified by column chromatography on silica gel to yield 2-substituted benzoic acid.

To a solution of 2-substituted benzoic acid (1.0 equiv.) and DMF (0.05 equiv.) in DCM (0.3 M) was added oxalyl chloride (1.50 equiv.) dropwise at rt. The reaction was stirred under the same conditions until bubbling stopped. Then, volatiles were removed by rotary evaporation under high vacuum. The crude reaction product was dissolved in DCM (0.3 M) and *tert*-butylamine (1.5 equiv.) as well as triethylamine (2.0 equiv.) were sequentially added at room temperature. The reaction was stirred for 1 to 3 h before being quenched with 1.0 M aqueous HCl. The crude mixture was diluted with DCM (0.1 M) and water (0.1 M). The organic layer was removed and then, the aqueous layer was extracted with DCM. The combined organic layers were washed with saturated aqueous NaHCO<sub>3</sub> and brine, dried with NaSO<sub>4</sub>, filtered, and concentrated by rotary evaporation. The residue thus obtained was purified by silica gel column chromatography (typically 20% EtOAc in hexanes) to afford the pure amide.

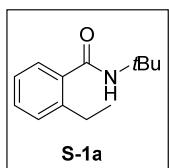

#### *N*-(*tert*-butyl)-2-ethylbenzamide (S-1a)

White powder, 1.86 g (91% yield). <sup>1</sup>H NMR (400 MHz, CDCl<sub>3</sub>): δ 7.35-7.27 (m, 2H), 7.23 (dd, *J* = 7.6, 1.4 Hz, 1H), 7.17 (td, *J* = 7.4, 1.4 Hz, 1H), 5.57 (s, 1H), 2.79 (q, *J* = 7.5 Hz, 2H), 1.46 (s, 9H), 1.25 (t, *J* = 7.6 Hz, 3H); <sup>13</sup>C NMR (100 MHz, CDCl<sub>3</sub>): δ 169.8, 141.8, 137.5, 129.5, 129.3, 126.6, 125.7, 51.8, 28.8, 26.3, 15.9.

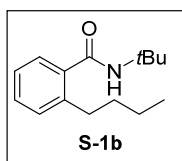

#### *N*-(*tert*-butyl)-2-butylbenzamide (S-1b)

White powder, 1.00 g (43% yield).  $^1\text{H NMR}$  (400 MHz,  $\text{CDCl}_3$ ):  $\delta$  7.33-7.25 (m, 2H), 7.23-7.10 (m, 2H), 5.57 (s, 1H), 2.81-2.71 (m, 2H), 1.64-1.54 (m, 2H), 1.46 (s, 9H), 1.42-1.35 (m, 2H), 0.92 (t,  $J = 7.4$  Hz, 3H);  $^{13}\text{C NMR}$  (100 MHz,  $\text{CDCl}_3$ ):  $\delta$  169.9, 140.4, 137.8, 130.0, 129.3, 126.6, 125.6, 51.7, 33.9, 33.0, 28.8, 22.8, 14.0.

**HRMS** (ESI)  $m/z$  calcd. for  $\text{C}_{15}\text{H}_{24}\text{NO}$   $[\text{M}+\text{H}]^+$  234.1852, found 234.1851.

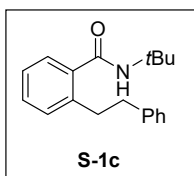

***N*-(*tert*-butyl)-2-phenethylbenzamide (S-1c)**

White powder, 1.55 g (55% yield).  $^1\text{H NMR}$  (400 MHz,  $\text{CDCl}_3$ ):  $\delta$  7.33-7.23 (m, 4H), 7.22-7.14 (m, 5H), 5.47 (s, 1H), 3.11-3.00 (m, 2H), 2.96-2.88 (m, 2H), 1.44 (s, 9H);  $^{13}\text{C NMR}$  (100 MHz,  $\text{CDCl}_3$ ):  $\delta$  169.8, 141.9, 139.5, 138.0, 130.2, 129.5, 128.6, 128.3, 126.6, 126.0, 125.9, 51.7, 38.1, 35.5, 28.8.

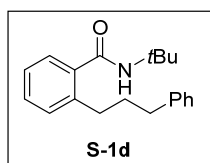

***N*-(*tert*-butyl)-2-(3-phenylpropyl)benzamide (S-1d)**

White powder, 1.13 g (38% yield).  $^1\text{H NMR}$  (400 MHz,  $\text{CDCl}_3$ ):  $\delta$  7.33-7.24 (m, 4H), 7.23-7.14 (m, 5H), 5.53 (s, 1H), 2.86-2.78 (m, 2H), 2.71-2.63 (m, 2H), 2.01-1.90 (m, 2H), 1.44 (s, 9H);  $^{13}\text{C NMR}$  (100 MHz,  $\text{CDCl}_3$ ):  $\delta$  169.8, 142.2, 140.0, 137.9, 130.0, 129.4, 128.4, 128.3, 126.6, 125.8, 125.7, 51.8, 35.9, 33.2, 32.9, 28.8.

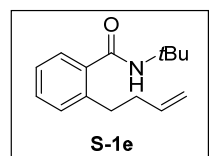

**2-(but-3-en-1-yl)-*N*-(*tert*-butyl)benzamide (S-1e)**

White powder, 0.80 g (35% yield).  $^1\text{H NMR}$  (400 MHz,  $\text{CDCl}_3$ ):  $\delta$  7.38-7.27 (m, 2H), 7.25-7.11 (m, 2H), 5.91-5.79 (m, 1H), 5.57 (s, 1H), 5.06-4.99 (m, 1H), 4.98-4.93 (m, 1H), 2.94-2.82 (m, 2H), 2.45-2.29 (m, 2H), 1.46 (s, 9H);  $^{13}\text{C NMR}$  (100 MHz,  $\text{CDCl}_3$ ):  $\delta$  169.8, 139.4, 138.1, 137.9, 130.1, 129.4, 126.6, 125.9, 115.0, 51.8, 35.6, 32.6, 28.8.

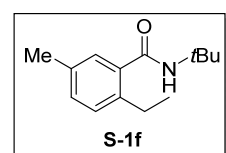

***N*-(*tert*-butyl)-2-ethyl-5-methylbenzamide (S-1f)**

White powder, 1.60 g (73% yield).  $^1\text{H NMR}$  (400 MHz,  $\text{CDCl}_3$ ):  $\delta$  7.14-7.08 (m, 3H), 5.55 (s, 1H), 2.74 (q,  $J = 7.5$  Hz, 2H), 2.31 (s, 3H), 1.46 (s, 9H), 1.22 (t,  $J = 7.6$  Hz, 3H);  $^{13}\text{C NMR}$  (100 MHz,  $\text{CDCl}_3$ ):  $\delta$  170.0, 138.7, 137.5, 135.2, 130.2, 129.2, 127.2, 51.7, 28.8, 25.8, 20.8, 16.0.

**HRMS** (ESI)  $m/z$  calcd. for  $\text{C}_{14}\text{H}_{22}\text{NO}$   $[\text{M}+\text{H}]^+$  220.1696, found 220.1695.

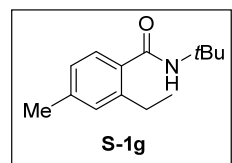

***N*-(*tert*-butyl)-2-ethyl-4-methylbenzamide (S-1g)**

White powder, 1.51 g (69% yield).  $^1\text{H NMR}$  (400 MHz,  $\text{CDCl}_3$ ):  $\delta$  7.17 (d,  $J = 7.8$  Hz, 1H), 7.02 (d,  $J = 1.8$  Hz, 1H), 6.95 (dd,  $J = 7.8, 1.8$  Hz, 1H), 5.61 (s, 1H), 2.76 (q,  $J = 7.6$  Hz, 2H), 2.32 (s, 3H), 1.44 (s, 9H), 1.22 (t,  $J = 7.6$  Hz, 3H);  $^{13}\text{C NMR}$  (100 MHz,  $\text{CDCl}_3$ ):  $\delta$  169.9, 141.9, 139.4, 134.8, 130.1, 126.7, 126.2, 51.6, 28.8, 26.3, 21.3, 15.9.

**HRMS** (ESI)  $m/z$  calcd. for  $\text{C}_{14}\text{H}_{22}\text{NO}$   $[\text{M}+\text{H}]^+$  220.1696, found 220.1695.

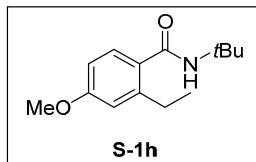

***N*-(*tert*-butyl)-2-ethyl-4-methoxybenzamide (S-1h)**

White powder, 1.12 g (48% yield).  $^1\text{H NMR}$  (400 MHz,  $\text{CDCl}_3$ ):  $\delta$  7.24 (d,  $J = 8.4$  Hz, 1H), 6.74 (d,  $J = 2.6$  Hz, 1H), 6.67 (dd,  $J = 8.4, 2.6$  Hz, 1H), 5.59 (s, 1H), 3.79 (s, 3H), 2.79 (q,  $J = 7.6$  Hz, 2H), 1.44 (s, 9H), 1.23 (t,  $J = 7.6$  Hz, 3H);  $^{13}\text{C NMR}$  (100 MHz,  $\text{CDCl}_3$ ):  $\delta$  169.6, 160.4, 144.2, 130.2,

128.3, 115.0, 110.5, 55.2, 51.6, 28.8, 26.6, 15.7.

**HRMS** (ESI)  $m/z$  calcd. for  $\text{C}_{14}\text{H}_{22}\text{NO}_2$   $[\text{M}+\text{H}]^+$  236.1645, found 236.1643.

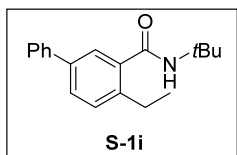

***N*-(*tert*-butyl)-4-ethyl-[1,1'-biphenyl]-3-carboxamide (S-1i)**

Orange powder, 0.67 g (48 % yield).  $^1\text{H NMR}$  (400 MHz,  $\text{CDCl}_3$ ):  $\delta$  7.57-7.48 (m, 4H), 7.46-7.39 (m, 2H), 7.37-7.31 (m, 1H), 7.29 (d,  $J = 8.0$  Hz, 1H), 5.65 (s, 1H), 2.82 (q,  $J = 7.6$  Hz, 2H), 1.47 (s, 9H), 1.28 (t,  $J = 7.6$  Hz, 3H);  $^{13}\text{C NMR}$  (100 MHz,  $\text{CDCl}_3$ ):  $\delta$  169.8, 140.8, 140.4, 138.8, 138.1,

129.8, 128.8, 128.1, 127.4, 127.0, 125.3, 51.9, 28.9, 26.0, 15.8.

**HRMS** (ESI)  $m/z$  calcd. for  $\text{C}_{19}\text{H}_{24}\text{NO}$   $[\text{M}+\text{H}]^+$  282.1852, found 282.1851.

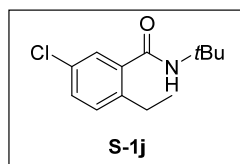

***N*-(*tert*-butyl)-5-chloro-2-ethylbenzamide (S-1j)**

White powder, 1.25 g (53% yield).  $^1\text{H NMR}$  (400 MHz,  $\text{CDCl}_3$ ):  $\delta$  7.23-7.19 (m, 2H), 7.14 (dd,  $J = 8.2, 2.0$  Hz, 1H), 5.57 (s, 1H), 2.76 (q,  $J = 7.6$  Hz, 2H), 1.45 (s, 9H), 1.23 (t,  $J = 7.6$  Hz, 3H);  $^{13}\text{C NMR}$  (100 MHz,  $\text{CDCl}_3$ ):  $\delta$  168.8, 144.0, 135.9, 135.3, 129.3, 127.9, 125.8, 51.9, 28.8, 26.1,

15.5.

**HRMS** (ESI)  $m/z$  calcd. for  $\text{C}_{13}\text{H}_{19}^{34.9689}\text{ClNO}$   $[\text{M}+\text{H}]^+$  240.1150, found 240.1149; calcd. for  $\text{C}_{13}\text{H}_{19}^{36.9659}\text{ClNO}$   $[\text{M}+\text{H}]^+$  242.1120, found 240.1118.

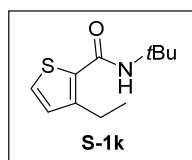

***N*-(*tert*-butyl)-3-ethylthiophene-2-carboxamide (S-1k)**

Orange powder, 1.40 g (66% yield).  $^1\text{H NMR}$  (400 MHz,  $\text{CDCl}_3$ ):  $\delta$  7.22 (d,  $J = 5.1$  Hz, 1H), 6.93 (d,  $J = 5.1$  Hz, 1H), 5.66 (s, 1H), 2.92 (q,  $J = 7.6$  Hz, 2H), 1.45 (s, 9H), 1.26 (t,  $J = 7.6$  Hz, 3H);  $^{13}\text{C NMR}$  (100 MHz,  $\text{CDCl}_3$ ):  $\delta$  162.5, 146.8, 131.8, 130.2, 125.8, 51.9, 28.9, 22.8, 15.0.

**HRMS** (ESI)  $m/z$  calcd. for  $\text{C}_{11}\text{H}_{18}\text{NOS}$   $[\text{M}+\text{H}]^+$  212.1104, found 212.1103.

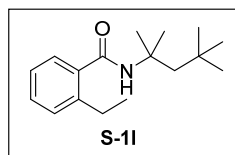

**2-ethyl-*N*-(2,4,4-trimethylpentan-2-yl)benzamide (S-1l)**

White powder, 2.09 g (80% yield).  $^1\text{H NMR}$  (400 MHz,  $\text{CDCl}_3$ ):  $\delta$  7.37-7.29 (m, 2H), 7.28-7.24 (m, 1H), 7.20 (td,  $J = 7.4, 1.4$  Hz, 1H), 5.59 (s, 1H), 2.83 (q,  $J = 7.6$  Hz, 2H), 1.88 (s, 2H), 1.54 (s, 6H), 1.27 (t,  $J = 7.6$  Hz, 3H), 1.08 (s, 9H);  $^{13}\text{C NMR}$  (100 MHz,  $\text{CDCl}_3$ ):  $\delta$  169.4, 142.1, 137.7, 129.5,

129.4, 126.3, 125.7, 55.8, 51.9, 31.7, 31.6, 29.2, 26.2, 15.9.

**HRMS** (ESI)  $m/z$  calcd. for  $\text{C}_{17}\text{H}_{28}\text{NO}$   $[\text{M}+\text{H}]^+$  262.2165, found 262.2164.



## General synthesis of *N*-alkylbenzamides S-1m–S-1q

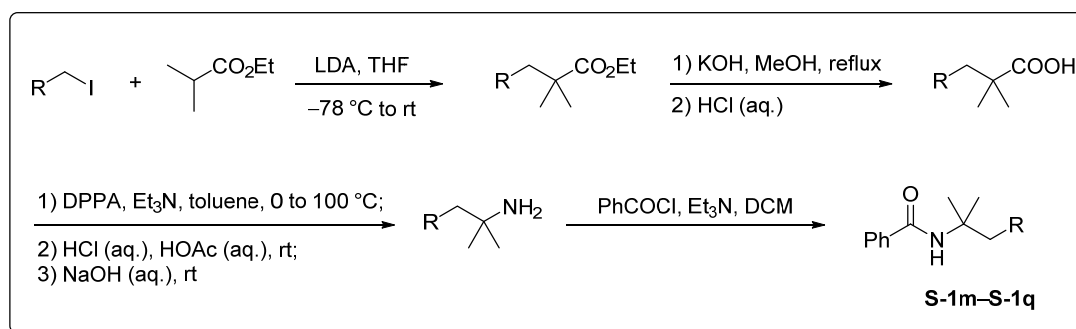

**Supplementary Figure 238** General synthesis of *N*-alkylbenzamides S-1m–S-1q

According to the literature procedures.<sup>5,7</sup>

To a solution of freshly distilled diisopropylamine (1.05 equiv.) in anhydrous THF (0.33 M) was added *n*-butyllithium (2.4 M, 1.05 equiv.) dropwise at -78 °C under argon. Upon completion, the reaction mixture was allowed to warm to 0 °C and stirred for 0.5 h. Next, the reaction solution was cooled to -78 °C and ethyl isobutyrate (1.0 equiv.) was added dropwise. The stirring was continued for 1 h at -78 °C and then, alkyl iodide (1.0 equiv.) was added. The stirring was continued overnight at room temperature. Upon completion, the reaction mixture was poured into ice-water and extracted with diethyl ether. The combined organic phase was washed with brine and dried over anhydrous MgSO<sub>4</sub>. Evaporation of organic solvent gave the crude product ester without further purification for the next step.

The crude ester was dissolved in methanol (1.0 M) and 30% aqueous NaOH (2.5 equiv.) was added. The reaction solution was then refluxed for 2 h. After being cooled, the mixture was diluted with water and extracted once with diethyl ether. Then, the aqueous solution was acidified with 10% HCl at 0 °C until pH = 1. The mixture was extracted with diethyl ether. The combined organic phase was washed with brine and dried over anhydrous Na<sub>2</sub>SO<sub>4</sub>. Evaporation of organic solvent gave the crude acid without further purification for the next step.

To a stirred solution of the crude acid (1.0 equiv.) and triethylamine (1.05 equiv.) in dry toluene (0.2 M) was added diphenylphosphoryl azide (DPPA) (1.05 equiv) at 0 °C for 1 h under argon. The reaction was stirred for 1 h at rt and then refluxed for 12 h (evolution of N<sub>2</sub>) under argon. Upon completion, the solution was cooled and washed with water. The toluene phase was separated and dried over anhydrous Na<sub>2</sub>SO<sub>4</sub>. Next, toluene was removed by evaporation and a mixture of 15 % HCl (10 mL) and acetic acid (10 mL) was added. After about 10 mins of a rapid evolution of CO<sub>2</sub>, the reaction mixture was stirred at rt overnight. Upon completion, the mixture was extracted once with diethyl ether and then, the aqueous solution was basified by a cooled 10% aqueous solution of NaOH until pH =13. The mixture was extracted with diethyl ether. The combined extracts were washed with water and brine and dried over anhydrous Na<sub>2</sub>SO<sub>4</sub>. Evaporation of organic solvent gave the crude amine without further purification for the next

step.

To a solution of the crude amine in DCM (0.3 M) were sequentially added benzoyl chloride (1.5 equiv.) and triethylamine (1.5 equiv.) at rt. The reaction mixture was stirred for 1 to 3 h under the same conditions. Upon completion, the mixture was quenched with 1 M aqueous HCl and transferred to a separatory funnel. The crude mixture was diluted with DCM and water. The organic layer was removed and the aqueous layer was extracted with DCM. The combined organic layers were washed with saturated aqueous NaHCO<sub>3</sub> and then brine. The organic layer was dried with NaSO<sub>4</sub>, filtered, and concentrated by rotary evaporation. The residue thus obtained was purified by silica gel column chromatography (typically 20% EtOAc in hexanes) to afford the pure amide.

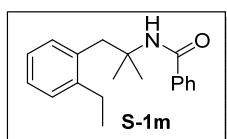

***N*-(1-(2-ethylphenyl)-2-methylpropan-2-yl)benzamide (S-1m)**

White powder, 1.46 g (26% yield). <sup>1</sup>H NMR (400 MHz, CDCl<sub>3</sub>): δ 7.71-7.64 (m, 2H), 7.49-7.44 (m, 1H), 7.42-7.37 (m, 2H), 7.25-7.11 (m, 3H), 7.07 (td, *J* = 7.2, 1.6 Hz, 1H), 5.84 (s, 1H), 3.23 (s, 2H), 2.75 (q, *J* = 7.5 Hz, 2H), 1.47 (s, 6H), 1.20 (t, *J* = 7.5 Hz, 3H); <sup>13</sup>C NMR (100 MHz, CDCl<sub>3</sub>): δ 167.3, 143.4, 136.0, 135.4, 131.5, 131.2, 128.7, 128.5, 126.8, 126.7, 125.4, 55.2, 40.4, 27.5, 26.0, 15.6.

**HRMS** (ESI) *m/z* calcd. for C<sub>19</sub>H<sub>24</sub>NO [M+H]<sup>+</sup> 282.1852, found 282.1851.

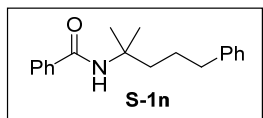

***N*-(2-methyl-5-phenylpentan-2-yl)benzamide (S-1n)**

White powder, 2.18 g (39% yield). <sup>1</sup>H NMR (400 MHz, CDCl<sub>3</sub>): δ 7.70-7.67 (m, 2H), 7.49-7.44 (m, 1H), 7.43-7.37 (m, 2H), 7.29-7.26 (m, 2H), 7.20-7.14 (m, 3H), 5.81 (s, 1H), 2.63 (t, *J* = 7.7 Hz, 2H), 1.93-1.86 (m, 2H), 1.69-1.60 (m, 2H), 1.42 (s, 6H); <sup>13</sup>C NMR (100 MHz, CDCl<sub>3</sub>) δ 166.9, 142.5, 135.9, 131.1, 128.5, 128.40, 128.36, 126.7, 125.8, 54.1, 39.9, 36.2, 27.1, 26.4.

**HRMS** (ESI) *m/z* calcd. for C<sub>19</sub>H<sub>24</sub>NO [M+H]<sup>+</sup> 282.1852, found 282.1850.

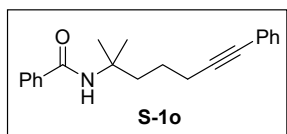

***N*-(2-methyl-7-phenylhept-6-yn-2-yl)benzamide (S-1o)**

Yellow oil, 1.35 g (22% yield). <sup>1</sup>H NMR (400 MHz, CDCl<sub>3</sub>): δ 7.76-7.69 (m, 2H), 7.49-7.35 (m, 5H), 7.29-7.24 (m, 3H), 5.96 (s, 1H), 2.54-2.34 (m, 2H), 2.12-1.92 (m, 2H), 1.78-1.59 (m, 2H), 1.47 (s, 6H); <sup>13</sup>C NMR (100 MHz, CDCl<sub>3</sub>): δ 167.0, 135.8, 131.6, 131.2, 128.5, 128.2, 127.6, 126.7, 123.9, 90.0, 81.0, 54.0, 39.6, 27.1, 23.9, 19.7.

**HRMS** (ESI) *m/z* calcd. for C<sub>21</sub>H<sub>24</sub>NO [M+H]<sup>+</sup> 306.1852, found 306.1850.

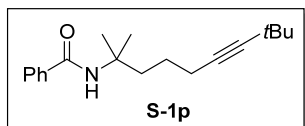

***N*-fluoro-*N*-(2,8,8-trimethylnon-6-yn-2-yl)benzamide (S-1p)**

Yellow oil, 2.00 g (35% yield). <sup>1</sup>H NMR (400 MHz, CDCl<sub>3</sub>): δ 7.75-7.69 (m, 2H), 7.52-7.37 (m, 3H), 5.89 (s, 1H), 2.17 (t, *J* = 7.1 Hz, 2H), 1.93-1.84 (m, 2H), 1.59-1.47 (m, 2H), 1.45 (s, 6H), 1.19 (s, 9H); <sup>13</sup>C

**NMR** (100 MHz, CDCl<sub>3</sub>):  $\delta$  166.8, 135.9, 131.1, 128.5, 126.7, 89.5, 78.2, 54.0, 39.7, 31.4, 27.3, 27.0, 24.3, 19.0.

**HRMS** (ESI)  $m/z$  calcd. for C<sub>19</sub>H<sub>28</sub>NO [M+H]<sup>+</sup> 286.2165, found 286.2164.

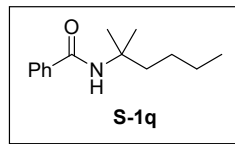

***N*-(2-methylhexan-2-yl)benzamide (S-1q)**

White powder, 1.75 g (40% yield). <sup>1</sup>H NMR (400 MHz, CDCl<sub>3</sub>):  $\delta$  7.75-7.66 (m, 2H), 7.51-7.37 (m, 3H), 5.84 (s, 1H), 1.85-1.76 (m, 2H), 1.43 (s, 6H), 1.41-1.23 (m, 4H), 0.91 (t,  $J$  = 7.0 Hz, 3H); <sup>13</sup>C NMR (100 MHz, CDCl<sub>3</sub>):  $\delta$  166.8, 136.1, 131.1, 128.5, 126.7, 54.1, 40.2, 27.0, 26.4, 23.1, 14.1.

**HRMS** (ESI)  $m/z$  calcd. for C<sub>14</sub>H<sub>22</sub>NO [M+H]<sup>+</sup> 220.1696, found 220.1695.

**General synthesis of *N*-alkylbenzamides [D<sub>1</sub>]-S-1aa and [D<sub>2</sub>]-S-1aa**

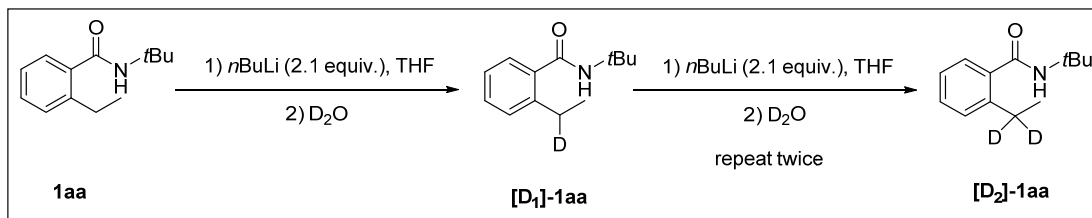

**Supplementary Figure 239** General synthesis of [D<sub>1</sub>]-S-1aa and [D<sub>2</sub>]-S-1aa

To a flame-dried 50 mL round-bottom flask with a stir bar was added **S-1aa** (10 mmol). The contents were evacuated and backfilled three times with argon. THF (20 mL, 0.2 M) was added via syringe and the flask was cooled on an ice bath for 15 minutes. *n*-Butyllithium (2.8 mL, 2.1 equiv., 2.2 M in hexanes) was added dropwise. The blood-red solution was stirred at 0 °C for 45 minutes, and then quenched with D<sub>2</sub>O (4 mL). The biphasic mixture was transferred to a separatory funnel and diluted with DCM and brine. The organic layer was removed, and the aqueous layer was extracted with DCM. The combined organic layers were dried with MgSO<sub>4</sub>, filtered, and concentrated by rotary evaporation to afford [D<sub>1</sub>]-S-1aa. <sup>1</sup>H NMR analysis showed >95% D-incorporation. The compound [D<sub>2</sub>]-S-1aa was prepared following the same procedure described above using [D<sub>1</sub>]-S-1aa (5 mmol) as substrate, and <sup>1</sup>H NMR analysis showed >95% D-incorporation after the procedure was repeated twice.

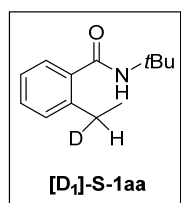

***N*-(*tert*-butyl)-2-(ethyl-1-*d*)benzamide ([D<sub>1</sub>]-S-1aa)**

White powder, 2.06 g (100% yield). <sup>1</sup>H NMR (400 MHz, CDCl<sub>3</sub>):  $\delta$  7.34-7.27 (m, 2H), 7.25-7.21 (m, 1H), 7.17 (td,  $J$  = 7.4, 1.4 Hz, 1H), 5.56 (s, 1H), 2.82-2.72 (m, 1H), 1.46 (s, 9H), 1.24 (d,  $J$  = 7.6 Hz, 2H); <sup>13</sup>C NMR (100 MHz, CDCl<sub>3</sub>):  $\delta$  169.8, 141.8, 137.6, 129.5, 129.3, 126.5, 125.6, 51.7, 28.8, 25.9 (t,  $J$  = 19.5 Hz), 15.8.

**HRMS** (ESI)  $m/z$  calcd. for C<sub>13</sub>H<sub>19</sub>DNO [M+H]<sup>+</sup> 207.1602, found 207.1602.

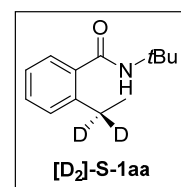

***N*-(*tert*-butyl)-2-(ethyl-1,1-*d*<sub>2</sub>)benzamide ([D<sub>2</sub>]-S-1aa)**

White powder, 1.01 g (97% yield).  $^1\text{H NMR}$  (400 MHz,  $\text{CDCl}_3$ ):  $\delta$  7.34-7.25 (m, 2H), 7.24-7.21 (m, 1H), 7.17 (td,  $J = 7.4, 1.2$  Hz, 1H), 5.56 (s, 1H), 1.46 (s, 9H), 1.23 (s, 3H);  $^{13}\text{C NMR}$  (100 MHz,  $\text{CDCl}_3$ ):  $\delta$  169.8, 141.8, 137.6, 129.6, 129.3, 126.5, 125.7, 51.7, 28.84, 28.82, 25.6 (p,  $J = 18.8$  Hz), 15.7.

**HRMS** (ESI)  $m/z$  calcd. for  $\text{C}_{13}\text{H}_{18}\text{D}_2\text{NO}$   $[\text{M}+\text{H}]^+$  208.1665, found 208.1664.

### General procedure for the synthesis of *N*-fluoro-*N*-alkylcarboxamides.

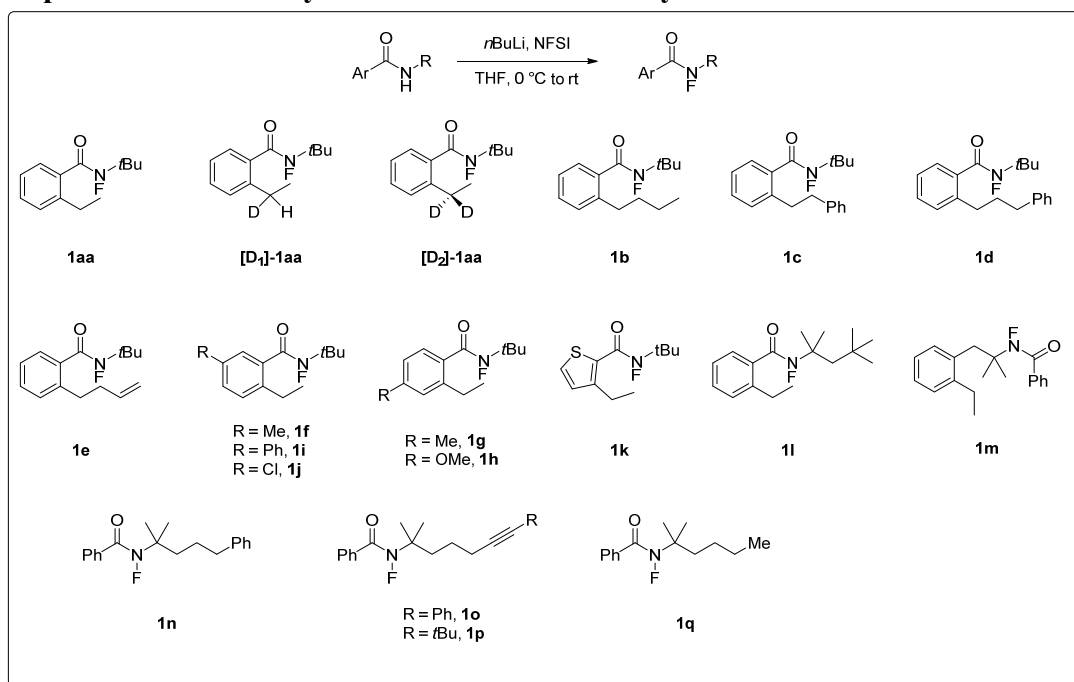

**Supplementary Figure 240** General synthesis of *N*-fluoro-*N*-alkylcarboxamides.

All the *N*-fluoro-*N*-alkylcarboxamides were prepared by *N*-fluorination of their parent carboxamides according to conventional methods.<sup>5,8</sup> To a flame-dried round-bottom flask with a stir bar was added amide (1.0 equiv.). The contents were evacuated and backfilled three times with argon. Anhydrous THF (0.13 M) was added and the stirred solution was cooled on an ice bath for 15 min. *n*-Butyllithium (1.1 equiv., 2.4 M in hexanes) was added dropwise. The reaction was maintained at  $0\text{ }^\circ\text{C}$  for 1.5 h. NFSI (1.5 equiv., 0.6 M in THF) was added dropwise. The reaction was left overnight in the ice bath and allowed to warm to rt. After 10 to 14 h, the reaction was quenched with 1 M aqueous HCl and transferred to a separatory funnel. The crude mixture was diluted with DCM (0.1 M) and water (0.1 M). The organic layer was removed, and the aqueous layer was extracted with DCM. The combined organic layers were washed with saturated aqueous  $\text{NaHCO}_3$  and then brine, dried with  $\text{MgSO}_4$ , filtered, and concentrated by rotary evaporation. The residue thus obtained was purified by silica gel column chromatography (15% EtOAc in hexanes) to afford pure fluoroamides.

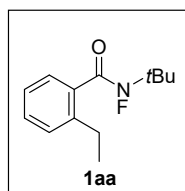

*N*-(*tert*-butyl)-2-ethyl-*N*-fluorobenzamide (**1aa**)

**1aa** was synthesized according to the procedures.<sup>5</sup>

Yellow oil, 590 mg (27% yield). <sup>1</sup>H NMR (400 MHz, CDCl<sub>3</sub>): δ 7.38 (td, *J* = 7.4, 1.4 Hz, 1H), 7.34-7.28 (m, 2H), 7.24 (td, *J* = 7.4, 1.4 Hz, 1H), 2.77 (q, *J* = 7.6 Hz, 2H), 1.58 (d, *J* = 2.0 Hz, 9H), 1.27 (t, *J* = 7.6 Hz, 3H); <sup>13</sup>C NMR (100 MHz, CDCl<sub>3</sub>): δ 175.0 (d, *J* = 10.9 Hz), 141.6 (d, *J* = 2.2 Hz), 134.6, 130.0 (d, *J* = 1.1 Hz), 128.9, 127.1 (d, *J* = 4.4 Hz), 125.4, 64.3 (d, *J* = 10.5 Hz), 27.1 (d, *J* = 5.6 Hz), 26.1, 15.7; <sup>19</sup>F NMR (376 MHz, CDCl<sub>3</sub>): δ -63.36.

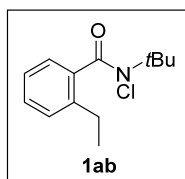

***N*-(*tert*-butyl)-*N*-chloro-2-ethylbenzamide (**1ab**)**

**1ab** was synthesized according to the procedures.<sup>5</sup>

Colorless oil, 370 mg (21% yield). <sup>1</sup>H NMR (400 MHz, CDCl<sub>3</sub>): δ 7.36-7.31 (m, 1H), 7.28-7.20 (m, 3H), 2.73 (q, *J* = 7.6 Hz, 2H), 1.64 (s, 9H), 1.28 (t, *J* = 7.6 Hz, 3H); <sup>13</sup>C NMR (100 MHz, CDCl<sub>3</sub>): δ 174.6, 140.5, 137.2, 129.3, 128.7,

126.3, 125.5, 64.5, 28.6, 26.0, 15.1.

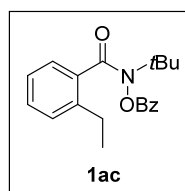

***N*-(benzoyloxy)-*N*-(*tert*-butyl)-2-ethylbenzamide (**1ac**)**

**1ab** was synthesized according to the procedures.<sup>9</sup>

Colorless oil, 490 mg (41% yield). <sup>1</sup>H NMR (400 MHz, CDCl<sub>3</sub>): δ 7.55-7.51 (m, 2H), 7.43-7.34 (m, 2H), 7.32-7.26 (m, 3H), 7.23-7.18 (m, 1H), 7.13 (td, *J* = 7.6, 1.2 Hz, 1H), 2.70-2.60 (m, 2H), 1.61 (s, 9H), 1.00 (t, *J* = 7.5 Hz, 3H); <sup>13</sup>C NMR (100 MHz, CDCl<sub>3</sub>): δ 171.7, 166.0, 146.8, 136.4, 132.9, 130.2, 130.0,

129.7, 127.9, 127.2, 125.9, 125.6, 62.8, 27.7, 26.7, 15.6.

**HRMS** (ESI) *m/z* calcd. for C<sub>20</sub>H<sub>24</sub>NO<sub>3</sub> [M+H]<sup>+</sup> 326.1751, found 326.1746.

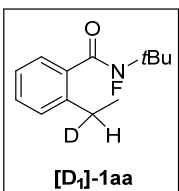

***N*-(*tert*-butyl)-2-(ethyl-1-*d*)-*N*-fluorobenzamide ([D<sub>1</sub>]-**1aa**)**

Yellow oil, 390 mg (35% yield). <sup>1</sup>H NMR (400 MHz, CDCl<sub>3</sub>): δ 7.37-7.32 (m, 1H), 7.31-7.24 (m, 2H), 7.20 (td, *J* = 7.5, 1.4 Hz, 1H), 2.76-2.67 (m, 1H), 1.55 (d, *J* = 2.0 Hz, 9H), 1.25-1.21 (m, 3H); <sup>13</sup>C NMR (100 MHz, CDCl<sub>3</sub>): δ 175.0 (d, *J* = 10.8 Hz), 141.6 (d, *J* = 2.0 Hz), 134.7, 130.0 (d, *J* = 1.4 Hz), 128.9, 127.1 (d, *J* = 4.4 Hz), 125.4, 64.3 (d, *J* = 10.5 Hz), 27.2 (d, *J* = 5.5 Hz), 25.8 (t, *J* = 19.5

Hz), 15.6; <sup>19</sup>F NMR (376 MHz, CDCl<sub>3</sub>) δ -63.39.

**HRMS** (ESI) *m/z* calcd. for C<sub>13</sub>H<sub>18</sub>DFNO [M+H]<sup>+</sup> 225.1508, found 225.1505.

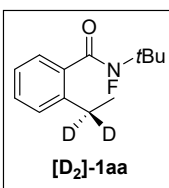

***N*-(*tert*-butyl)-2-(ethyl-1,1-*d*<sub>2</sub>)-*N*-fluorobenzamide ([D<sub>2</sub>]-**1aa**)**

Yellow oil, 310 mg (29% yield). <sup>1</sup>H NMR (400 MHz, CDCl<sub>3</sub>): δ 7.37-7.32 (m, 1H), 7.31-7.23 (m, 2H), 7.23-7.18 (m, 1H), 1.55 (d, *J* = 2.0 Hz, 9H), 1.22 (s, 3H); <sup>13</sup>C NMR (100 MHz, CDCl<sub>3</sub>): δ 175.0 (d, *J* = 10.9 Hz), 141.6, 134.6, 130.0 (d, *J* = 1.4 Hz), 128.9, 127.1 (d, *J* = 4.4 Hz), 125.4, 64.3 (d, *J* = 10.5 Hz), 27.2 (d, *J* = 5.7 Hz), 25.4 (p, *J* = 18.7 Hz), 15.5; <sup>19</sup>F NMR (376 MHz, CDCl<sub>3</sub>) δ -63.4.

**HRMS** (ESI) *m/z* calcd. for C<sub>13</sub>H<sub>17</sub>D<sub>2</sub>FNO [M+H]<sup>+</sup> 226.1571, found 226.1568.

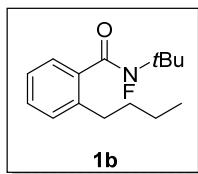

***N*-(*tert*-butyl)-2-butyl-*N*-fluorobenzamide (1b)**

Yellow oil, 440 mg (41% yield).  $^1\text{H NMR}$  (400 MHz,  $\text{CDCl}_3$ ):  $\delta$  7.35-7.27 (m, 2H), 7.26-7.17 (m, 2H), 2.77-2.65 (m, 2H), 1.62-1.56 (m, 2H), 1.55 (d,  $J = 2.0$  Hz, 9H), 1.42-1.32 (m, 2H), 0.92 (t,  $J = 7.3$  Hz, 3H);  $^{13}\text{C NMR}$  (100 MHz,  $\text{CDCl}_3$ ):  $\delta$  175.0 (d,  $J = 10.9$  Hz), 140.4 (d,  $J = 2.1$  Hz), 134.8, 129.8, 129.6, 127.2 (d,  $J = 4.3$  Hz), 125.3, 64.2 (d,  $J = 10.5$  Hz), 33.7, 32.8, 27.2 (d,  $J = 5.6$  Hz), 22.7, 13.9;  $^{19}\text{F NMR}$  (376 MHz,  $\text{CDCl}_3$ ):  $\delta$  -63.35.

**HRMS** (ESI)  $m/z$  calcd. for  $\text{C}_{15}\text{H}_{23}\text{FNO}$   $[\text{M}+\text{H}]^+$  252.1758, found 252.1754.

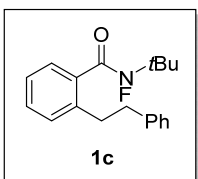

***N*-(*tert*-butyl)-*N*-fluoro-2-phenethylbenzamide (1c)**

Yellow oil, 420 mg (26% yield).  $^1\text{H NMR}$  (400 MHz,  $\text{CDCl}_3$ ):  $\delta$  7.44-7.08 (m, 9H), 3.05-2.96 (m, 2H), 2.96-2.86 (m, 2H), 1.56 (d,  $J = 1.8$  Hz, 9H);  $^{13}\text{C NMR}$  (100 MHz,  $\text{CDCl}_3$ ):  $\delta$  174.9 (d,  $J = 10.8$  Hz), 141.7, 139.3 (d,  $J = 2.0$  Hz), 134.8, 130.0, 129.9, 128.45, 128.38, 127.5 (d,  $J = 4.5$  Hz), 126.0, 125.7, 64.3 (d,  $J = 10.5$  Hz), 38.0, 35.5, 27.2 (d,  $J = 5.6$  Hz);  $^{19}\text{F NMR}$  (376 MHz,  $\text{CDCl}_3$ ):  $\delta$  -63.08.

**HRMS** (ESI)  $m/z$  calcd. for  $\text{C}_{19}\text{H}_{23}\text{FNO}$   $[\text{M}+\text{H}]^+$  300.1758, found 300.1755.

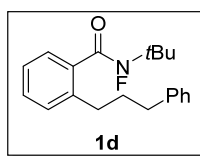

***N*-(*tert*-butyl)-*N*-fluoro-2-(3-phenylpropyl)benzamide (1d)**

Yellow oil, 430 mg (26% yield).  $^1\text{H NMR}$  (400 MHz,  $\text{CDCl}_3$ ):  $\delta$  7.37-7.20 (m, 6H), 7.20-7.14 (m, 3H), 2.79-2.70 (m, 2H), 2.66 (t,  $J = 7.7$  Hz, 2H), 2.01-1.90 (m, 2H), 1.52 (d,  $J = 1.8$  Hz, 9H);  $^{13}\text{C NMR}$  (100 MHz,  $\text{CDCl}_3$ ):  $\delta$  174.9 (d,  $J = 10.9$  Hz), 142.1, 139.8 (d,  $J = 2.0$  Hz), 134.9, 129.9, 129.6, 128.5, 128.3, 127.3 (d,  $J = 4.4$  Hz), 125.8, 125.5, 64.3 (d,  $J = 10.4$  Hz), 35.8, 33.0, 32.8, 27.1 (d,  $J = 5.6$  Hz);  $^{19}\text{F NMR}$  (376 MHz,  $\text{CDCl}_3$ ):  $\delta$  -63.28.

**HRMS** (ESI)  $m/z$  calcd. for  $\text{C}_{20}\text{H}_{25}\text{FNO}$   $[\text{M}+\text{H}]^+$  314.1915, found 314.1911.

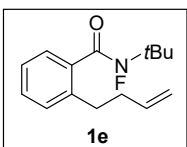

**2-(but-3-en-1-yl)-*N*-(*tert*-butyl)-*N*-fluorobenzamide (1e)**

Yellow oil, 250 mg (29% yield).  $^1\text{H NMR}$  (400 MHz,  $\text{CDCl}_3$ ):  $\delta$  7.38-7.29 (m, 2H), 7.27-7.18 (m, 2H), 5.90-5.78 (m, 1H), 5.08-5.93 (m, 2H), 2.85-2.75 (m, 2H), 2.43-2.29 (m, 2H), 1.55 (d,  $J = 1.9$  Hz, 9H);  $^{13}\text{C NMR}$  (100 MHz,  $\text{CDCl}_3$ ):  $\delta$  174.8 (d,  $J = 10.9$  Hz), 139.3 (d,  $J = 2.1$  Hz), 137.9, 134.9, 129.9 (d,  $J = 1.4$  Hz), 129.7, 127.3 (d,  $J = 4.4$  Hz), 125.6, 115.0, 64.3 (d,  $J = 10.5$  Hz), 35.5, 32.5, 27.2 (d,  $J = 5.6$  Hz);  $^{19}\text{F NMR}$  (376 MHz,  $\text{CDCl}_3$ )  $\delta$  -63.26.

**HRMS** (ESI)  $m/z$  calcd. for  $\text{C}_{15}\text{H}_{21}\text{FNO}$   $[\text{M}+\text{H}]^+$  250.1602, found 250.1599.

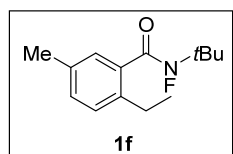

***N*-(*tert*-butyl)-2-ethyl-*N*-fluoro-5-methylbenzamide (1f)**

Yellow oil, 730 mg (42% yield).  $^1\text{H NMR}$  (400 MHz,  $\text{CDCl}_3$ ):  $\delta$  7.18-7.07 (m, 3H), 2.69 (q,  $J = 7.5$  Hz, 2H), 2.32 (s, 3H), 1.55 (d,  $J = 2.0$  Hz, 9H), 1.21 (t,  $J = 7.6$  Hz, 3H);  $^{13}\text{C NMR}$  (100 MHz,  $\text{CDCl}_3$ ):  $\delta$  175.2 (d,  $J = 11.2$  Hz), 138.5 (d,  $J = 2.2$  Hz), 135.0, 134.6, 130.8, 128.8, 127.5 (d,  $J = 4.2$  Hz),

64.3 (d,  $J = 10.5$  Hz), 27.2 (d,  $J = 5.6$  Hz), 25.7, 20.8, 15.7;  $^{19}\text{F}$  NMR (376 MHz,  $\text{CDCl}_3$ ):  $\delta$  -63.49.

**HRMS** (ESI)  $m/z$  calcd. for  $\text{C}_{14}\text{H}_{21}\text{FNO}$   $[\text{M}+\text{H}]^+$  238.1602, found 238.1598.

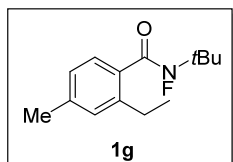

***N*-(*tert*-butyl)-2-ethyl-*N*-fluoro-4-methylbenzamide (1g)**

610 mg (39% yield).  $^1\text{H}$  NMR (400 MHz,  $\text{CDCl}_3$ ):  $\delta$  7.22 (d,  $J = 7.8$  Hz, 1H), 7.06 (s, 1H), 7.04-6.98 (m, 1H), 2.71 (q,  $J = 7.6$  Hz, 2H), 2.34 (s, 3H), 1.54 (d,  $J = 2.0$  Hz, 9H), 1.23 (t,  $J = 7.6$  Hz, 3H);  $^{13}\text{C}$  NMR (100 MHz,  $\text{CDCl}_3$ ):  $\delta$  175.4 (d,  $J = 10.5$  Hz), 141.9 (d,  $J = 1.9$  Hz), 140.2, 131.7, 129.8,

127.5 (d,  $J = 4.7$  Hz), 126.1, 64.2 (d,  $J = 10.5$  Hz), 27.2 (d,  $J = 5.6$  Hz), 26.1, 21.4, 15.8;  $^{19}\text{F}$  NMR (376 MHz,  $\text{CDCl}_3$ ):  $\delta$  -62.95.

**HRMS** (ESI)  $m/z$  calcd. for  $\text{C}_{14}\text{H}_{21}\text{FNO}$   $[\text{M}+\text{H}]^+$  238.1602, found 238.1598.

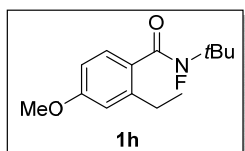

***N*-(*tert*-butyl)-2-ethyl-*N*-fluoro-4-methoxybenzamide (1h)**

Yellow oil, 520 mg (43% yield).  $^1\text{H}$  NMR (400 MHz,  $\text{CDCl}_3$ ):  $\delta$  7.32 (d,  $J = 8.5$  Hz, 1H), 6.81-6.66 (m, 2H), 3.82 (s, 3H), 2.75 (q,  $J = 7.6$  Hz, 2H), 1.53 (d,  $J = 1.9$  Hz, 9H), 1.24 (t,  $J = 7.7$  Hz, 3H);  $^{13}\text{C}$  NMR (100 MHz,  $\text{CDCl}_3$ ):  $\delta$  175.3 (d,  $J = 10.5$  Hz), 161.0, 144.7 (d,  $J = 1.9$  Hz), 129.8 (d,  $J =$

5.0 Hz), 126.9, 114.7, 110.4, 64.11 (d,  $J = 10.6$  Hz), 55.2, 27.1 (d,  $J = 5.7$  Hz), 26.4, 15.7;  $^{19}\text{F}$  NMR (376 MHz,  $\text{CDCl}_3$ ):  $\delta$  -62.16.

**HRMS** (ESI)  $m/z$  calcd. for  $\text{C}_{14}\text{H}_{21}\text{FNO}_2$   $[\text{M}+\text{H}]^+$  254.1551, found 254.1547.

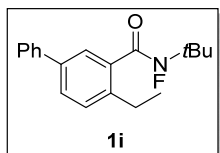

***N*-(*tert*-butyl)-4-ethyl-*N*-fluoro-[1,1'-biphenyl]-3-carboxamide (1i)**

Yellow oil, 330 mg (46% yield).  $^1\text{H}$  NMR (400 MHz,  $\text{CDCl}_3$ ):  $\delta$  7.59-7.55 (m, 3H), 7.54-7.50 (m, 1H), 7.45-7.40 (m, 2H), 7.36-7.30 (m, 2H), 2.77 (q,  $J = 7.6$  Hz, 2H), 1.57 (d,  $J = 1.9$  Hz, 9H), 1.27 (t,  $J = 7.6$  Hz, 3H);  $^{13}\text{C}$  NMR (100 MHz,  $\text{CDCl}_3$ ):  $\delta$  174.9 (d,  $J = 10.9$  Hz), 140.6 (d,  $J = 2.1$  Hz), 140.3,

138.5, 135.1, 129.4, 128.8, 128.7, 127.4, 127.1, 125.8 (d,  $J = 4.3$  Hz), 64.4 (d,  $J = 10.5$  Hz), 27.2 (d,  $J = 5.5$  Hz), 25.8, 15.6;  $^{19}\text{F}$  NMR (376 MHz,  $\text{CDCl}_3$ )  $\delta$  -63.19.

**HRMS** (ESI)  $m/z$  calcd. for  $\text{C}_{19}\text{H}_{23}\text{FNO}$   $[\text{M}+\text{H}]^+$  300.1758, found 300.1755.

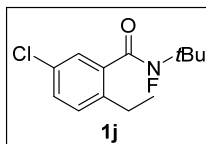

***N*-(*tert*-butyl)-5-chloro-2-ethyl-*N*-fluorobenzamide (1j)**

Yellow oil, 650 mg (48% yield).  $^1\text{H}$  NMR (400 MHz,  $\text{CDCl}_3$ ):  $\delta$  7.27-7.23 (m, 2H), 7.18 (dd,  $J = 8.2, 2.0$  Hz, 1H), 2.71 (q,  $J = 7.6$  Hz, 2H), 1.54 (d,  $J = 2.0$  Hz, 9H), 1.23 (t,  $J = 7.6$  Hz, 3H);  $^{13}\text{C}$  NMR (100 MHz,  $\text{CDCl}_3$ ):  $\delta$  174.0 (d,  $J = 10.9$  Hz), 143.8 (d,  $J = 2.2$  Hz), 135.9 (d,  $J = 1.7$  Hz), 133.0, 129.0,

128.7 (d,  $J = 4.6$  Hz), 125.6, 64.4 (d,  $J = 10.5$  Hz), 27.1 (d,  $J = 5.6$  Hz), 26.0, 15.3;  $^{19}\text{F}$  NMR (376 MHz,  $\text{CDCl}_3$ )  $\delta$  -63.23.

**HRMS** (ESI)  $m/z$  calcd. for  $\text{C}_{13}\text{H}_{18}^{34,9689}\text{ClFNO}$   $[\text{M}+\text{H}]^+$  258.1055, found 258.1052; calcd. for  $\text{C}_{13}\text{H}_{18}^{36,9659}\text{ClFNO}$   $[\text{M}+\text{H}]^+$  260.1026, found 260.1023.

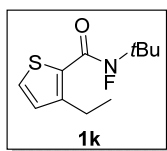

***N*-(*tert*-butyl)-3-ethyl-*N*-fluorothiophene-2-carboxamide (1k)**

Yellow oil, 670 mg (44% yield).  $^1\text{H NMR}$  (400 MHz,  $\text{CDCl}_3$ ):  $\delta$  7.43 (d,  $J = 5.1$  Hz, 1H), 6.97 (dd,  $J = 5.1, 1.7$  Hz, 1H), 2.93 (q,  $J = 7.5$  Hz, 2H), 1.51 (d,  $J = 2.0$  Hz, 9H), 1.25 (t,  $J = 7.5$  Hz, 3H);  $^{13}\text{C NMR}$  (100 MHz,  $\text{CDCl}_3$ ):  $\delta$  169.2 (d,  $J = 7.0$  Hz), 152.2, 129.9 (d,  $J = 6.3$  Hz), 129.2, 127.5 (d,  $J = 2.6$  Hz), 64.5 (d,  $J = 10.7$  Hz), 26.9 (d,  $J = 6.2$  Hz), 23.4, 14.8;  $^{19}\text{F NMR}$  (376 MHz,  $\text{CDCl}_3$ ):  $\delta$  -64.22.

**HRMS** (ESI)  $m/z$  calcd. for  $\text{C}_{11}\text{H}_{17}\text{FNOS}$   $[\text{M}+\text{H}]^+$  230.1009, found 230.1007.

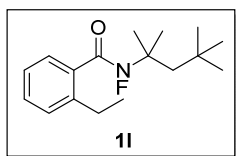

**2-ethyl-*N*-fluoro-*N*-(2,4,4-trimethylpentan-2-yl)benzamide (1l)**

Yellow oil, 690 mg (31% yield).  $^1\text{H NMR}$  (400 MHz,  $\text{CDCl}_3$ ):  $\delta$  7.38-7.30 (m, 1H), 7.26 (dd,  $J = 7.2, 1.6$  Hz, 2H), 7.20 (td,  $J = 7.4, 1.2$  Hz, 1H), 2.73 (q,  $J = 7.6$  Hz, 2H), 1.90 (d,  $J = 2.0$  Hz, 2H), 1.62 (d,  $J = 2.2$  Hz, 6H), 1.24 (t,  $J = 7.6$  Hz, 3H), 1.08 (s, 9H);  $^{13}\text{C NMR}$  (100 MHz,  $\text{CDCl}_3$ ):  $\delta$  173.8 (d,  $J = 11.4$  Hz), 141.5 (d,  $J = 2.2$  Hz), 134.9, 129.9 (d,  $J = 1.5$  Hz), 128.9, 126.8 (d,  $J = 4.5$  Hz), 125.4, 68.1 (d,  $J = 9.6$  Hz), 51.3 (d,  $J = 3.6$  Hz), 31.6, 31.3, 27.6 (d,  $J = 6.0$  Hz), 26.0, 15.7;  $^{19}\text{F NMR}$  (376 MHz,  $\text{CDCl}_3$ ):  $\delta$  -61.33.

**HRMS** (ESI)  $m/z$  calcd. for  $\text{C}_{17}\text{H}_{27}\text{FNO}$   $[\text{M}+\text{H}]^+$  280.2071, found 280.2069.

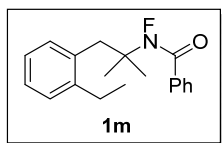

***N*-(1-(2-ethylphenyl)-2-methylpropan-2-yl)-*N*-fluorobenzamide (1m)**

Yellow oil, 430 mg (28% yield).  $^1\text{H NMR}$  (400 MHz,  $\text{CDCl}_3$ ):  $\delta$  7.73-7.67 (m, 2H), 7.52-7.47 (m, 1H), 7.41 (dd,  $J = 8.2, 6.8$  Hz, 2H), 7.25-7.18 (m, 3H), 7.15-7.09 (m, 1H), 3.28 (s, 2H), 2.76 (q,  $J = 7.5$  Hz, 2H), 1.51 (d,  $J = 2.3$  Hz, 6H), 1.20 (t,  $J = 7.5$  Hz, 3H);  $^{13}\text{C NMR}$  (100 MHz,  $\text{CDCl}_3$ ):  $\delta$  174.1 (d,  $J = 7.8$  Hz), 143.5, 134.6, 134.3, 131.8, 131.6, 128.9 (d,  $J = 6.0$  Hz), 128.7, 128.1, 127.0, 125.4, 68.1 (d,  $J = 9.4$  Hz), 38.9 (d,  $J = 3.7$  Hz), 26.0, 25.2 (d,  $J = 6.5$  Hz), 16.0;  $^{19}\text{F NMR}$  (376 MHz,  $\text{CDCl}_3$ ):  $\delta$  -63.82.

**HRMS** (ESI)  $m/z$  calcd. for  $\text{C}_{19}\text{H}_{23}\text{FNO}$   $[\text{M}+\text{H}]^+$  300.1758, found 300.1755.

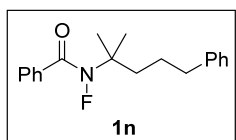

***N*-fluoro-*N*-(2-methyl-5-phenylpentan-2-yl)benzamide (1n)**

Yellow oil, 910 mg (39% yield).  $^1\text{H NMR}$  (400 MHz,  $\text{CDCl}_3$ ):  $\delta$  7.70-7.65 (m, 2H), 7.53 – 7.45 (m, 1H), 7.42 – 7.37 (m, 2H), 7.30-7.25 (m, 2H), 7.22-7.15 (m, 3H), 2.64 (t,  $J = 7.6$  Hz, 2H), 1.94-1.87 (m, 2H), 1.82-1.73 (m, 2H), 1.49 (d,  $J = 1.9$  Hz, 6H);  $^{13}\text{C NMR}$  (100 MHz,  $\text{CDCl}_3$ ):  $\delta$  174.3 (d,  $J = 7.7$  Hz), 142.3, 134.2 (d,  $J = 1.3$  Hz), 131.7, 129.7, 128.8 (d,  $J = 6.1$  Hz), 128.4 (d,  $J = 4.0$  Hz), 128.0, 125.8, 66.7 (d,  $J = 9.7$  Hz), 39.8 (d,  $J = 4.8$  Hz), 36.2, 26.1, 25.1 (d,  $J = 6.2$  Hz);  $^{19}\text{F NMR}$  (376 MHz,  $\text{CDCl}_3$ )  $\delta$  -66.11.

**HRMS** (ESI)  $m/z$  calcd. for  $\text{C}_{19}\text{H}_{23}\text{FNO}$   $[\text{M}+\text{H}]^+$  300.1758, found 300.1755.

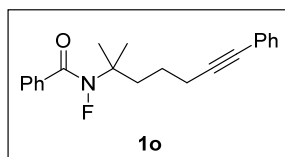

***N*-fluoro-*N*-(2-methyl-7-phenylhept-6-yn-2-yl) benzamide (1o)**



Yellow oil, 310 mg (23% yield).  $^1\text{H NMR}$  (400 MHz,  $\text{CDCl}_3$ ):  $\delta$  7.73-7.67 (m, 2H), 7.55-7.47 (m, 1H), 7.44-7.37 (m, 4H), 7.30-7.24 (m, 3H), 2.45 (t,  $J = 7.1$  Hz, 2H), 2.07-1.99 (m, 2H), 1.84-1.72 (m, 2H), 1.55 (d,  $J = 1.9$  Hz, 6H);  $^{13}\text{C NMR}$  (100 MHz,  $\text{CDCl}_3$ ):  $\delta$  174.3 (d,  $J = 7.6$  Hz), 134.1, 131.8, 131.6, 128.9 (d,  $J = 6.2$  Hz), 128.2, 128.0, 127.6, 123.9, 89.8, 81.0, 66.6 (d,  $J = 9.9$  Hz), 39.5 (d,  $J = 5.0$  Hz), 25.1 (d,  $J = 6.1$  Hz), 23.7, 19.7;  $^{19}\text{F NMR}$  (376 MHz,  $\text{CDCl}_3$ ):  $\delta$  -66.08. **HRMS** (ESI)  $m/z$  calcd. for  $\text{C}_{21}\text{H}_{23}\text{FNO}$   $[\text{M}+\text{H}]^+$  324.1758, found 324.1756.

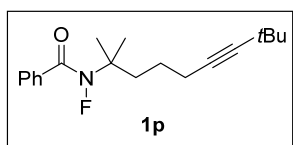

**N-fluoro-N-(2,8,8-trimethylnon-6-yn-2-yl)benzamide (1p)**

Yellow oil, 410 mg (19% yield).  $^1\text{H NMR}$  (400 MHz,  $\text{CDCl}_3$ ):  $\delta$  7.73-7.65 (m, 2H), 7.53-7.46 (m, 1H), 7.45-7.37 (m, 2H), 2.17 (t,  $J = 7.1$  Hz, 2H), 1.98-1.89 (m, 2H), 1.67-1.60 (m, 2H), 1.52 (d,  $J = 1.9$  Hz, 6H), 1.20 (s, 9H);  $^{13}\text{C NMR}$  (100 MHz,  $\text{CDCl}_3$ ):  $\delta$  174.3 (d,  $J = 7.7$  Hz), 134.2, 131.7, 128.9 (d,  $J = 6.1$  Hz), 128.0, 89.5, 78.0, 66.6 (d,  $J = 9.8$  Hz), 39.3 (d,  $J = 5.0$  Hz), 31.4, 27.3, 25.1 (d,  $J = 6.0$  Hz), 24.1, 19.0;  $^{19}\text{F NMR}$  (376 MHz,  $\text{CDCl}_3$ ):  $\delta$  -66.15.

**HRMS** (ESI)  $m/z$  calcd. for  $\text{C}_{19}\text{H}_{26}\text{FNO}$   $[\text{M}+\text{H}]^+$  304.2071, found 304.2069.

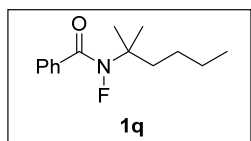

**N-fluoro-N-(2-methylhexan-2-yl)benzamide (1q)**

Yellow oil, 870 mg (46% yield).  $^1\text{H NMR}$  (400 MHz,  $\text{CDCl}_3$ ):  $\delta$  7.72-7.66 (m, 2H), 7.53-7.44 (m, 1H), 7.43-7.36 (m, 2H), 1.92-1.80 (m, 2H), 1.51 (d,  $J = 2.1$  Hz, 6H), 1.47-1.27 (m, 4H), 0.92 (t,  $J = 7.2$  Hz, 3H);  $^{13}\text{C NMR}$  (100 MHz,  $\text{CDCl}_3$ ):  $\delta$  174.1 (d,  $J = 7.8$  Hz), 134.3 (d,  $J = 1.4$  Hz), 131.6, 128.8 (d,  $J = 6.2$  Hz), 128.0, 66.8 (d,  $J = 9.6$  Hz), 39.7 (d,  $J = 4.9$  Hz), 26.3, 25.1 (d,  $J = 6.1$  Hz), 23.1, 14.1;  $^{19}\text{F NMR}$  (376 MHz,  $\text{CDCl}_3$ ):  $\delta$  -66.25.

**HRMS** (ESI)  $m/z$  calcd. for  $\text{C}_{14}\text{H}_{21}\text{FNO}$   $[\text{M}+\text{H}]^+$  238.1602, found 238.1598.

**General procedure for enantioselective Sonogashira-type oxidative cross-coupling of unactivated C(sp<sup>3</sup>)-H bonds with terminal alkynes**

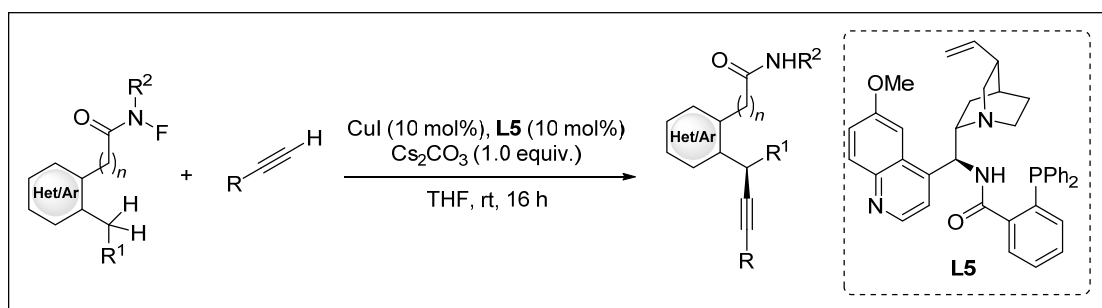

**Supplementary Figure 241** General procedure for enantioselective reaction

**General procedure A:**

Under argon atmosphere, an oven-dried resealable Schlenk tube equipped with a magnetic stir bar was charged with CuI (3.8 mg, 0.020 mmol, 10 mol%), **L5** (12.2 mg, 0.020 mmol, 10 mol%), Cs<sub>2</sub>CO<sub>3</sub> (65.2 mg, 0.20 mmol, 1.0 equiv.), and anhydrous THF (2.4 mL). Then, *N*-fluorocarboxamide (0.20 mmol, 1.0 equiv.) and alkyne (0.40 mmol, 2.0 equiv.) were sequentially added into the mixture and the reaction mixture was stirred at rt for 16 h. Upon completion (monitored by TLC), the precipitate was filtered off and washed by DCM. The filtrate was evaporated and the residue was purified by column chromatography on silica gel to afford the desired product.

**General procedure B:**

Under argon atmosphere, an oven-dried resealable Schlenk tube equipped with a magnetic stir bar was charged with CuTc (5.7 mg, 0.030 mmol, 15 mol%), **L5** (12.2 mg, 0.020 mmol, 10 mol%), Cs<sub>2</sub>CO<sub>3</sub> (130.4 mg, 0.40 mmol, 2.0 equiv.), and anhydrous THF (2.4 mL). Then, *N*-fluorocarboxamide (0.20 mmol, 1.0 equiv.) and alkyne (0.40 mmol, 2.0 equiv.) were sequentially added into the mixture and the reaction mixture was stirred at rt for 24 h. Upon completion (monitored by TLC), the precipitate was filtered off and washed by DCM. The filtrate was evaporated and the residue was purified by column chromatography on silica gel to afford the desired product.

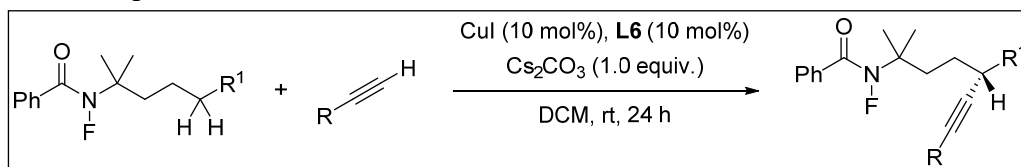

**Supplementary Figure 242** General procedure for enantioselective reaction

**General procedure C:**

Under argon atmosphere, an oven-dried resealable Schlenk tube equipped with a magnetic stir bar was charged with CuI (3.8 mg, 0.020 mmol, 10 mol%), **L6** (16.7 mg, 0.020 mmol, 10 mol%), Cs<sub>2</sub>CO<sub>3</sub> (65.2 mg, 0.20 mmol, 1.0 equiv.), and anhydrous DCM (2.4 mL). Then, *N*-

fluorocarboxamide (0.20 mmol, 1.0 equiv.) and alkyne (0.40 mmol, 2.0 equiv.) were sequentially added into the mixture and the reaction mixture was stirred at rt for 24 h. Upon completion (monitored by TLC), the precipitate was filtered off and washed by DCM. The filtrate was evaporated and the residue was purified by column chromatography on silica gel to afford the desired product.

#### General procedure D:

Under argon atmosphere, an oven-dried resealable Schlenk tube equipped with a magnetic stir bar was charged with CuI (3.8 mg, 0.020 mmol, 10 mol%), **L7** (13.9 mg, 0.020 mmol, 10 mol%), Cs<sub>2</sub>CO<sub>3</sub> (65.2 mg, 0.20 mmol, 1.0 equiv.), and anhydrous chloroform (2.4 mL). Then, *N*-fluorocarboxamide (0.20 mmol, 1.0 equiv.) and alkyne (0.40 mmol, 2.0 equiv.) were sequentially added into the mixture and the reaction mixture was stirred at rt for 24 h. Upon completion (monitored by TLC), the precipitate was filtered off and washed by DCM. The filtrate was evaporated and the residue was purified by column chromatography on silica gel to afford the desired product.

Since the reaction is sensitive to water and air, Schlenk tubes and the reagents must be dried prior to use.

#### General procedure for preparation of the racemates:

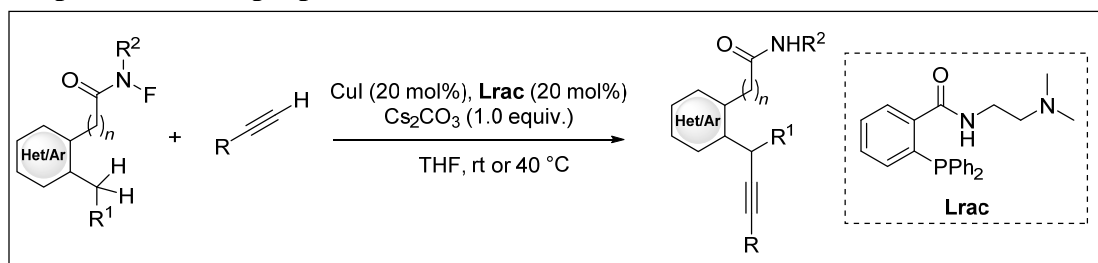

**Supplementary Figure 243** General procedure for racemic reaction

The racemates of products were prepared following the same procedure described above using CuI (0.020 mmol, 20 mol%) and **Lrac** (0.020 mmol, 20 mol%) as catalyst and ligand, respectively, at rt or 40 °C in anhydrous THF (1.2 mL) for 16 to 24 h. Upon completion (monitored by TLC), the precipitate was filtered off and washed with DCM. The filtrate was concentrated, and the residue was purified by column chromatography on silica gel to afford the desired product.

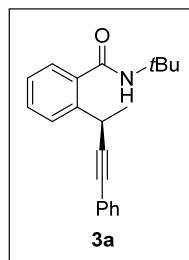

#### (*S*)-*N*-(*tert*-butyl)-2-(4-phenylbut-3-yn-2-yl)benzamide (**3a**)

According to general procedure A: Colorless oil, 50.8 mg (83%, 94% ee).

**HPLC** analysis: Chiralcel AD-H (*n*-hexane/*i*-PrOH = 90/10, flow rate 0.8 mL/min,  $\lambda$  = 254 nm),  $t_R$  (minor) = 5.96 min,  $t_R$  (major) = 8.93 min.

**<sup>1</sup>H NMR** (400 MHz, CDCl<sub>3</sub>):  $\delta$  7.72 (dd,  $J$  = 7.9, 1.2 Hz, 1H), 7.51-7.38 (m, 3H), 7.33 (dd,  $J$  = 7.6, 1.5 Hz, 1H), 7.30-7.21 (m, 4H), 5.76 (s, 1H), 4.48 (q,  $J$  = 7.0 Hz, 1H), 1.61 (d,  $J$  = 7.0 Hz, 3H), 1.47 (s, 9H); **<sup>13</sup>C NMR** (100 MHz,

CDCl<sub>3</sub>):  $\delta$  169.3, 141.1, 136.6, 131.6, 130.1, 128.2, 127.9, 127.8, 126.8, 126.7, 123.6, 93.1, 82.1, 52.0, 29.0, 28.8, 24.1.

**HRMS** (ESI)  $m/z$  calcd. for C<sub>21</sub>H<sub>24</sub>NO [M+H]<sup>+</sup> 306.1852, found 306.1849.

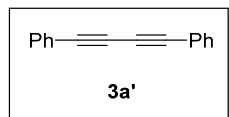

**1,4-diphenylbuta-1,3-diyne (3a')**

**3a'** matched the reported spectra.<sup>10</sup>

**<sup>1</sup>H NMR** (400 MHz, CDCl<sub>3</sub>):  $\delta$  7.57-7.49 (m, 2H), 7.39-7.29 (m, 3H); **<sup>13</sup>C NMR** (100 MHz, CDCl<sub>3</sub>):  $\delta$  132.5, 129.3, 128.5, 121.8, 81.6, 74.0.

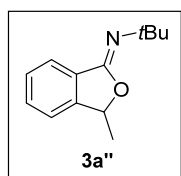

**(Z)-N-(tert-butyl)-3-methylisobenzofuran-1(3H)-imine (3a'')**

Colorless oil, **<sup>1</sup>H NMR** (400 MHz, CDCl<sub>3</sub>):  $\delta$  7.64-7.40 (m, 3H), 7.35-7.28 (m, 1H), 5.68 (q,  $J$  = 6.6 Hz, 1H), 1.62 (d,  $J$  = 6.6 Hz, 3H), 1.47 (s, 9H); **<sup>13</sup>C NMR** (100 MHz, CDCl<sub>3</sub>):  $\delta$  147.3, 132.2, 129.0, 128.3, 125.1, 120.7, 81.8, 54.7, 29.5, 20.9.

**HRMS** (ESI)  $m/z$  calcd. for C<sub>13</sub>H<sub>18</sub>NO [M+H]<sup>+</sup> 204.1383, found 204.1380.

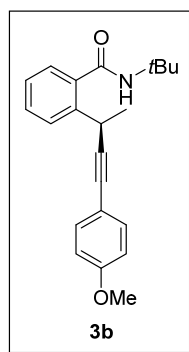

**(S)-N-(tert-butyl)-2-(4-(4-methoxyphenyl)but-3-yn-2-yl)benzamide (3b)**

According to general procedure A: Colorless oil, 47.3 mg (71%, 93% ee).

**HPLC** analysis: Chiralcel AD-H (*n*-hexane/*i*-PrOH = 90/10, flow rate 0.8 mL/min,  $\lambda$  = 254 nm),  $t_R$  (minor) = 7.30 min,  $t_R$  (major) = 15.69 min.

**<sup>1</sup>H NMR** (400 MHz, CDCl<sub>3</sub>):  $\delta$  7.71 (dd,  $J$  = 8.0, 1.2 Hz, 1H), 7.41 (td,  $J$  = 7.6, 1.6 Hz, 1H), 7.36-7.30 (m, 3H), 7.27-7.21 (m, 1H), 6.83-6.77 (m, 2H), 5.78 (s, 1H), 4.45 (q,  $J$  = 7.0 Hz, 1H), 3.79 (s, 3H), 1.60 (d,  $J$  = 7.0 Hz, 3H), 1.47 (s, 9H); **<sup>13</sup>C NMR** (100 MHz, CDCl<sub>3</sub>):  $\delta$  169.3, 159.2, 141.2, 136.6, 133.0, 130.1, 127.9, 126.9, 126.7, 115.8, 113.8, 91.6, 81.8, 55.3, 52.0, 29.0, 28.8, 24.1.

**HRMS** (ESI)  $m/z$  calcd. for C<sub>22</sub>H<sub>26</sub>NO<sub>2</sub> [M+H]<sup>+</sup> 336.1958, found 336.1953.

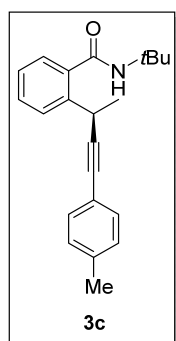

**(S)-N-(tert-butyl)-2-(4-(p-tolyl)but-3-yn-2-yl)benzamide (3c)**

According to general procedure A: Colorless oil, 46.2 mg (73%, 94% ee).

**HPLC** analysis: Chiralcel AD-H (*n*-hexane/*i*-PrOH = 90/10, flow rate 0.8 mL/min,  $\lambda$  = 254 nm),  $t_R$  (minor) = 5.69 min,  $t_R$  (major) = 10.25 min.

**<sup>1</sup>H NMR** (400 MHz, CDCl<sub>3</sub>):  $\delta$  7.71 (dd,  $J$  = 8.0, 1.2 Hz, 1H), 7.40 (td,  $J$  = 7.6, 1.6 Hz, 1H), 7.35-7.27 (m, 3H), 7.24 (td,  $J$  = 8.0, 1.6 Hz, 1H), 7.12-7.05 (m, 2H), 5.78 (s, 1H), 4.46 (d,  $J$  = 7.0 Hz, 1H), 2.32 (s, 3H), 1.60 (d,  $J$  = 7.0 Hz, 3H), 1.46 (s, 9H); **<sup>13</sup>C NMR** (100 MHz, CDCl<sub>3</sub>):  $\delta$  169.3, 141.2, 137.8, 136.6, 131.5, 130.1, 129.0, 127.9, 126.9, 126.7, 120.5, 92.4, 82.1, 52.0, 29.0, 28.8, 24.1, 21.4.

**HRMS** (ESI)  $m/z$  calcd. for C<sub>22</sub>H<sub>26</sub>NO [M+H]<sup>+</sup> 320.2009, found 320.2006.

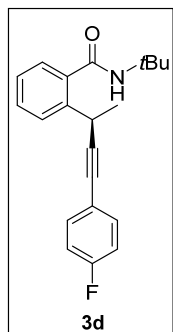

**(S)-N-(tert-butyl)-2-(4-(4-fluorophenyl)but-3-yn-2-yl)benzamide (3d)**

According to general procedure A: Colorless oil, 50.1 mg (78%, 93% ee).

**HPLC** analysis: Chiralcel AD-H (*n*-hexane/*i*-PrOH = 90/10, flow rate 0.8 mL/min,  $\lambda$  = 254 nm),  $t_R$  (minor) = 6.45 min,  $t_R$  (major) = 12.19 min.

**$^1\text{H}$  NMR** (400 MHz,  $\text{CDCl}_3$ ):  $\delta$  7.70 (dd,  $J$  = 8.0, 1.2 Hz, 1H), 7.45-7.36 (m, 3H), 7.33 (dd,  $J$  = 7.6, 1.6 Hz, 1H), 7.28-7.22 (m, 1H), 7.00-6.94 (m, 2H), 5.75 (s, 1H), 4.48 (q,  $J$  = 7.0 Hz, 1H), 1.60 (d,  $J$  = 7.1 Hz, 3H), 1.47 (s, 9H);  **$^{13}\text{C}$  NMR** (100 MHz,  $\text{CDCl}_3$ ):  $\delta$  169.2, 162.2 (d,  $J$  = 248.6 Hz), 141.1, 136.5, 133.4 (d,  $J$  = 8.2 Hz), 130.1, 127.9, 126.83, 126.75, 119.7 (d,  $J$  = 3.5 Hz), 115.4 (d,  $J$  = 22.0 Hz), 92.8, 80.9, 52.0, 28.9, 28.8, 24.1;  **$^{19}\text{F}$  NMR** (376 MHz,  $\text{CDCl}_3$ ):  $\delta$  -111.84.

**HRMS** (ESI)  $m/z$  calcd. for  $\text{C}_{21}\text{H}_{23}\text{FNO}$   $[\text{M}+\text{H}]^+$  324.1758, found 324.1755.

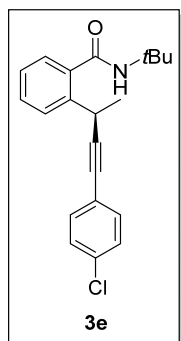

**(S)-N-(tert-butyl)-2-(4-(4-chlorophenyl)but-3-yn-2-yl)benzamide (3e)**

According to general procedure A: Colorless oil, 56.4 mg (83%, 92% ee).

**HPLC** analysis: Chiralcel AD-H (*n*-hexane/*i*-PrOH = 90/10, flow rate 0.8 mL/min,  $\lambda$  = 254 nm),  $t_R$  (minor) = 6.46 min,  $t_R$  (major) = 14.36 min.

**$^1\text{H}$  NMR** (400 MHz,  $\text{CDCl}_3$ ):  $\delta$  7.69 (dd,  $J$  = 7.9, 1.2 Hz, 1H), 7.41 (td,  $J$  = 7.6, 1.5 Hz, 1H), 7.36 -7.30 (m, 3H), 7.28 -7.23 (m, 3H), 5.75 (s, 1H), 4.50 (q,  $J$  = 7.0 Hz, 1H), 1.60 (d,  $J$  = 7.0 Hz, 3H), 1.46 (s, 9H);  **$^{13}\text{C}$  NMR** (100 MHz,  $\text{CDCl}_3$ ):  $\delta$  169.2, 140.9, 136.5, 133.7, 132.8, 130.2, 128.5, 127.9, 126.84, 126.78, 122.1, 94.2, 80.9, 52.0, 29.0, 28.8, 24.1.

**HRMS** (ESI)  $m/z$  calcd. for  $\text{C}_{21}\text{H}_{23}^{34.9689}\text{ClNO}$   $[\text{M}+\text{H}]^+$  340.1463, found 340.1460; calcd. for  $\text{C}_{21}\text{H}_{23}^{36.9659}\text{ClNO}$   $[\text{M}+\text{H}]^+$  342.1433, found 342.1430.

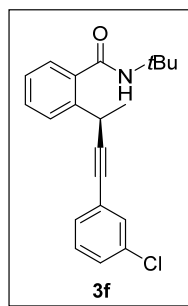

**(S)-N-(tert-butyl)-2-(4-(3-chlorophenyl)but-3-yn-2-yl)benzamide (3f)**

According to general procedure A: Colorless oil, 51.6 mg (76%, 92% ee).

**HPLC** analysis: Chiralcel AD-H (*n*-hexane/*i*-PrOH = 98/2, flow rate 0.8 mL/min,  $\lambda$  = 254 nm),  $t_R$  (minor) = 10.69 min,  $t_R$  (major) = 15.99 min.

**$^1\text{H}$  NMR** (400 MHz,  $\text{CDCl}_3$ ):  $\delta$  7.69 (dd,  $J$  = 8.0, 1.2 Hz, 1H), 7.46-7.38 (m, 2H), 7.33 (dd,  $J$  = 7.6, 1.6 Hz, 1H), 7.31-7.18 (m, 4H), 5.74 (s, 1H), 4.51 (q,  $J$  = 7.0 Hz, 1H), 1.60 (d,  $J$  = 7.0 Hz, 3H), 1.47 (s, 9H);  **$^{13}\text{C}$  NMR** (100 MHz,  $\text{CDCl}_3$ ):  $\delta$  169.2, 140.9, 136.5, 134.0, 131.5, 130.2, 129.7, 129.5, 128.1, 127.9,

126.82, 126.81, 125.4, 94.6, 80.7, 52.0, 28.9, 28.8, 24.0.

**HRMS** (ESI)  $m/z$  calcd. for  $\text{C}_{21}\text{H}_{23}^{34.9689}\text{ClNO}$   $[\text{M}+\text{H}]^+$  340.1463, found 340.1459; calcd. for  $\text{C}_{21}\text{H}_{23}^{36.9659}\text{ClNO}$   $[\text{M}+\text{H}]^+$  342.1433, found 342.1430.

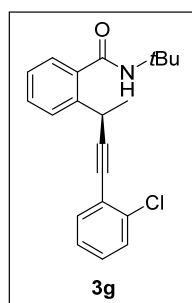

**(S)-N-(tert-butyl)-2-(4-(2-chlorophenyl)but-3-yn-2-yl)benzamide (3g)**

According to general procedure A: Colorless oil, 66.5 mg (98%, 93% ee).

**HPLC** analysis: Chiralcel AD-H (*n*-hexane/*i*-PrOH = 95/5, flow rate 0.8 mL/min,  $\lambda$  = 254 nm),  $t_R$  (minor) = 7.07 min,  $t_R$  (major) = 8.73 min.

**$^1\text{H}$  NMR** (400 MHz,  $\text{CDCl}_3$ ):  $\delta$  7.80 (dd,  $J$  = 8.0, 1.2 Hz, 1H), 7.46-7.39 (m, 2H), 7.38-7.30 (m, 2H), 7.25-7.14 (m, 3H), 5.76 (s, 1H), 4.56 (q,  $J$  = 7.0 Hz,

1H), 1.64 (d,  $J = 7.0$  Hz, 3H), 1.47 (s, 9H);  $^{13}\text{C}$  NMR (100 MHz,  $\text{CDCl}_3$ ):  $\delta$  169.3, 140.9, 136.5, 136.0, 133.2, 130.1, 129.2, 128.8, 128.1, 126.8, 126.4, 123.5, 98.7, 79.1, 52.0, 29.3, 28.8, 24.2.

**HRMS** (ESI)  $m/z$  calcd. for  $\text{C}_{21}\text{H}_{23}^{34.9689}\text{ClNO}$   $[\text{M}+\text{H}]^+$  340.1463, found 340.1460; calcd. for  $\text{C}_{21}\text{H}_{23}^{36.9659}\text{ClNO}$   $[\text{M}+\text{H}]^+$  342.1433, found 342.1431.

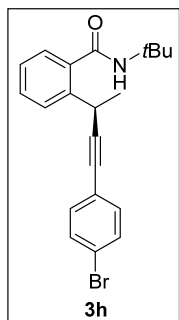

**(S)-2-(4-(4-bromophenyl)but-3-yn-2-yl)-N-(tert-butyl)benzamide (3h)**

According to general procedure A: White powder, 64.7 mg (84%, 92% ee).

**HPLC** analysis: Chiralcel AD-H (*n*-hexane/*i*-PrOH = 90/10, flow rate 0.8 mL/min,  $\lambda = 254$  nm),  $t_R$  (minor) = 6.60 min,  $t_R$  (major) = 15.87 min.

$^1\text{H}$  NMR (400 MHz,  $\text{CDCl}_3$ ):  $\delta$  7.69 (dd,  $J = 7.9, 1.2$  Hz, 1H), 7.44 -7.39 (m, 3H), 7.33 (dd,  $J = 7.6, 1.5$  Hz, 1H), 7.29 -7.23 (m, 3H), 5.74 (s, 1H), 4.49 (q,  $J = 7.0$  Hz, 1H), 1.60 (d,  $J = 7.0$  Hz, 3H), 1.46 (s, 9H);  $^{13}\text{C}$  NMR (100 MHz,  $\text{CDCl}_3$ ):  $\delta$  169.2, 140.9, 136.5, 133.1, 131.5, 130.2, 127.9, 126.83, 126.79, 122.6,

121.9, 94.5, 81.0, 52.0, 29.0, 28.8, 24.0.

**HRMS** (ESI)  $m/z$  calcd. for  $\text{C}_{21}\text{H}_{23}^{78.9183}\text{BrNO}$   $[\text{M}+\text{H}]^+$  384.0958, found 384.0954; calcd. for  $\text{C}_{21}\text{H}_{23}^{80.9163}\text{BrNO}$   $[\text{M}+\text{H}]^+$  386.0937, found 386.0932.

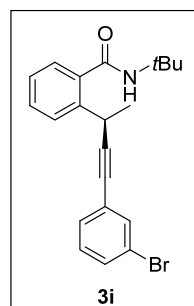

**(S)-2-(4-(3-bromophenyl)but-3-yn-2-yl)-N-(tert-butyl)benzamide (3i)**

According to general procedure A: White powder, 63.3 mg (83%, 92% ee).

**HPLC** analysis: Chiralcel AD-H (*n*-hexane/*i*-PrOH = 90/10, flow rate 0.8 mL/min,  $\lambda = 254$  nm),  $t_R$  (minor) = 5.81 min,  $t_R$  (major) = 6.80 min.

$^1\text{H}$  NMR (400 MHz,  $\text{CDCl}_3$ ):  $\delta$  7.69 (dd,  $J = 7.8, 1.2$  Hz, 1H), 7.56 (t,  $J = 1.8$  Hz, 1H), 7.45-7.38 (m, 2H), 7.35-7.30 (m, 2H), 7.28-7.23 (m, 1H), 7.15 (t,  $J = 7.9$  Hz, 1H), 5.74 (s, 1H), 4.51 (q,  $J = 7.0$  Hz, 1H), 1.60 (d,  $J = 7.1$  Hz, 3H), 1.47 (s, 9H);  $^{13}\text{C}$  NMR (100 MHz,  $\text{CDCl}_3$ ):  $\delta$  169.2, 140.9, 136.5, 134.4, 131.0,

130.19, 130.15, 129.7, 127.9, 126.8, 125.7, 122.0, 94.7, 80.6, 52.0, 28.9, 28.8, 24.0.

**HRMS** (ESI)  $m/z$  calcd. for  $\text{C}_{21}\text{H}_{23}^{78.9183}\text{BrNO}$   $[\text{M}+\text{H}]^+$  384.0958, found 384.0954; calcd. for  $\text{C}_{21}\text{H}_{23}^{80.9163}\text{BrNO}$   $[\text{M}+\text{H}]^+$  386.0937, found 386.0932.

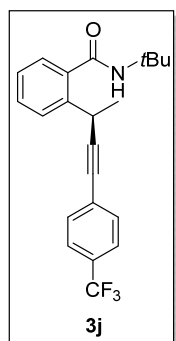

**(S)-N-(tert-butyl)-2-(4-(4-(trifluoromethyl)phenyl)but-3-yn-2-yl)benzamide (3j)**

According to general procedure A: Colorless oil, 56.8 mg (76%, 92% ee).

**HPLC** analysis: Chiralcel AD-H (*n*-hexane/*i*-PrOH = 90/10, flow rate 0.8 mL/min,  $\lambda = 254$  nm),  $t_R$  (minor) = 5.92 min,  $t_R$  (major) = 15.01 min.

$^1\text{H}$  NMR (400 MHz,  $\text{CDCl}_3$ ):  $\delta$  7.70 (d,  $J = 8.0$  Hz, 1H), 7.57-7.48 (m, 4H), 7.43 (td,  $J = 7.6, 1.6$  Hz, 1H), 7.34 (dd,  $J = 7.6, 1.6$  Hz, 1H), 7.29-7.23 (m, 1H), 5.73 (s, 1H), 4.55 (q,  $J = 7.0$  Hz, 1H), 1.62 (d,  $J = 7.1$  Hz, 3H), 1.48 (s, 9H);  $^{13}\text{C}$  NMR (100 MHz,  $\text{CDCl}_3$ ):  $\delta$  169.2, 140.8, 136.5, 131.8, 130.2, 129.0 (q,  $J = 32.5$

Hz), 127.9, 127.5, 126.9, 126.8, 125.1 (q,  $J = 3.8$  Hz), 124.0 (q,  $J = 271.0$  Hz), 95.9, 80.8, 52.0, 28.9, 28.8, 24.0;  $^{19}\text{F}$  NMR (376 MHz,  $\text{CDCl}_3$ ):  $\delta$  -62.73.

**HRMS** (ESI)  $m/z$  calcd. for  $C_{22}H_{23}F_3NO$   $[M+H]^+$  374.1726, found 374.1722.

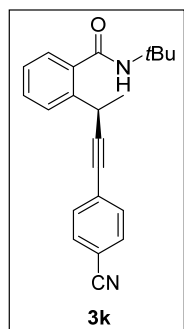

**(S)-N-(tert-butyl)-2-(4-(4-cyanophenyl)but-3-yn-2-yl)benzamide (3k)**

According to general procedure A: Colorless oil, 45.9 mg (70%, 89% ee).

**HPLC** analysis: Chiralcel AD-H (*n*-hexane/*i*-PrOH = 90/10, flow rate 0.8 mL/min,  $\lambda$  = 254 nm),  $t_R$  (minor) = 13.07 min,  $t_R$  (major) = 23.37 min.

**$^1H$  NMR** (400 MHz,  $CDCl_3$ ):  $\delta$  7.68 (dd,  $J$  = 7.8, 1.3 Hz, 1H), 7.59-7.54 (m, 2H), 7.51-7.46 (m, 2H), 7.43 (td,  $J$  = 7.6, 1.6 Hz, 1H), 7.34 (dd,  $J$  = 7.6, 1.5 Hz, 1H), 7.30-7.23 (m, 1H), 5.76 (s, 1H), 4.59 (q,  $J$  = 7.0 Hz, 1H), 1.61 (d,  $J$  = 7.1 Hz, 3H), 1.47 (s, 9H);  **$^{13}C$  NMR** (100 MHz,  $CDCl_3$ ):  $\delta$  169.1, 140.6, 136.4, 132.2, 131.9, 130.2, 128.7, 127.9, 126.92, 126.86, 118.6, 111.1, 98.2, 80.6, 52.0,

29.0, 28.8, 24.0.

**HRMS** (ESI)  $m/z$  calcd. for  $C_{22}H_{23}N_2O$   $[M+H]^+$  331.1805, found 331.1802.

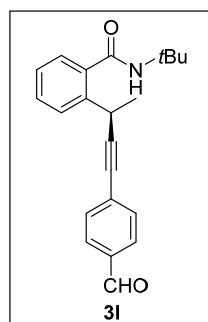

**(S)-N-(tert-butyl)-2-(4-(4-formylphenyl)but-3-yn-2-yl)benzamide (3l)**

According to general procedure A: White powder, 40.8 mg (62%, 91% ee).

**HPLC** analysis: Chiralcel AD-H (*n*-hexane/*i*-PrOH = 90/10, flow rate 0.8 mL/min,  $\lambda$  = 254 nm),  $t_R$  (minor) = 11.70 min,  $t_R$  (major) = 21.85 min.

**$^1H$  NMR** (400 MHz,  $CDCl_3$ ):  $\delta$  10.0 (s, 1H), 7.80 (d,  $J$  = 8.0 Hz, 2H), 7.71 (dd,  $J$  = 8.0, 1.2 Hz, 1H), 7.55 (d,  $J$  = 8.0 Hz, 2H), 7.43 (td,  $J$  = 7.6, 1.6 Hz, 1H), 7.35 (dd,  $J$  = 7.6, 1.6 Hz, 1H), 7.27 (t,  $J$  = 6.4 Hz, 1H), 5.77 (s, 1H), 4.58 (q,  $J$  = 7.0 Hz, 1H), 1.62 (d,  $J$  = 7.0 Hz, 3H), 1.48 (s, 9H);  **$^{13}C$  NMR** (100 MHz,  $CDCl_3$ ):  $\delta$  191.5, 169.2, 140.7, 136.4, 135.1, 132.2, 130.2, 130.1, 129.5,

127.9, 126.88, 126.85, 97.8, 81.3, 52.0, 29.1, 28.8, 24.0.

**HRMS** (ESI)  $m/z$  calcd. for  $C_{22}H_{24}NO_2$   $[M+H]^+$  334.1802, found 334.1798.

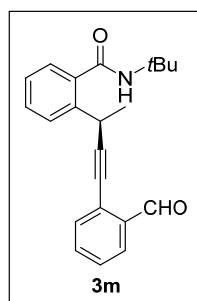

**(S)-N-(tert-butyl)-2-(4-(2-formylphenyl)but-3-yn-2-yl)benzamide (3m)**

According to general procedure A: Colorless oil, 50.3 mg (76%, 87% ee).

**HPLC** analysis: Chiralcel AD-H (*n*-hexane/*i*-PrOH = 90/10, flow rate 0.8 mL/min,  $\lambda$  = 254 nm),  $t_R$  (minor) = 8.40 min,  $t_R$  (major) = 11.80 min.

**$^1H$  NMR** (400 MHz,  $CDCl_3$ ):  $\delta$  10.51 (s, 1H), 7.89 (d,  $J$  = 7.8 Hz, 1H), 7.70 (dd,  $J$  = 8.0, 1.2 Hz, 1H), 7.55-7.50 (m, 2H), 7.47-7.37 (m, 2H), 7.34 (dd,  $J$  = 7.6, 1.6 Hz, 1H), 7.27 (td,  $J$  = 7.6, 1.2 Hz, 1H), 5.77 (s, 1H), 4.64 (q,  $J$  = 7.0 Hz, 1H), 1.64 (d,  $J$  = 7.1 Hz, 3H), 1.48 (s, 9H);  **$^{13}C$  NMR** (100 MHz,  $CDCl_3$ ):  $\delta$

192.0, 169.1, 140.7, 136.3, 136.1, 133.8, 133.4, 130.3, 128.2, 127.9, 127.4, 127.1, 126.93, 126.85, 100.7, 77.7, 52.0, 29.1, 28.8, 24.1.

**HRMS** (ESI)  $m/z$  calcd. for  $C_{22}H_{24}NO_2$   $[M+H]^+$  334.1802, found 334.1798.

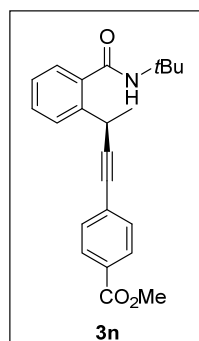

**methyl-(S)-4-(3-(2-(tert-butylcarbamoyl)phenyl)but-1-yn-1-yl)benzoate (3n)**

According to general procedure A: Colorless oil, 54.7 mg (76%, 92% ee).

**HPLC** analysis: Chiralcel AD-H (*n*-hexane/*i*-PrOH = 90/10, flow rate 0.8 mL/min,  $\lambda$  = 254 nm),  $t_R$  (minor) = 8.27 min,  $t_R$  (major) = 19.26 min.

**$^1\text{H}$  NMR** (400 MHz,  $\text{CDCl}_3$ ):  $\delta$  7.99-7.91 (m, 2H), 7.70 (dd,  $J$  = 8.0, 1.2 Hz, 1H), 7.49-7.45 (m, 2H), 7.42 (td,  $J$  = 7.6, 1.6 Hz, 1H), 7.33 (dd,  $J$  = 7.6, 1.6 Hz, 1H), 7.25 (td,  $J$  = 7.4, 1.2 Hz, 1H), 5.80 (s, 1H), 4.55 (q,  $J$  = 7.0 Hz, 1H), 3.89 (s, 3H), 1.62 (d,  $J$  = 7.0 Hz, 3H), 1.47 (s, 9H);  **$^{13}\text{C}$  NMR** (100 MHz,  $\text{CDCl}_3$ ):  $\delta$  169.2, 166.6, 140.8, 136.5, 131.5, 130.2, 129.4, 129.1, 128.5, 127.9, 126.85, 126.82, 96.6, 81.4, 52.2, 52.0, 29.0, 28.8, 24.0.

**HRMS** (ESI)  $m/z$  calcd. for  $\text{C}_{23}\text{H}_{26}\text{NO}_3$   $[\text{M}+\text{H}]^+$  364.1907, found 364.1904.

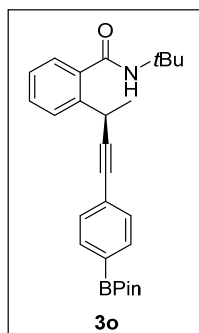

**(S)-N-(tert-butyl)-2-(4-(4-(4,4,5,5-tetramethyl-1,3,2-dioxaborolan-2-yl)phenyl)but-3-yn-2-yl)benzamide (3o)**

According to general procedure A: Colorless oil, 61.9 mg (72%, 94% ee).

**HPLC** analysis: Chiralcel AD-H (*n*-hexane/*i*-PrOH = 90/10, flow rate 0.8 mL/min,  $\lambda$  = 254 nm),  $t_R$  (minor) = 5.35 min,  $t_R$  (major) = 14.91 min.

**$^1\text{H}$  NMR** (400 MHz,  $\text{CDCl}_3$ ):  $\delta$  7.74-7.67 (m, 3H), 7.45-7.38 (m, 3H), 7.33 (dd,  $J$  = 7.6, 1.6 Hz, 1H), 7.27-7.22 (m, 1H), 5.78 (s, 1H), 4.49 (q,  $J$  = 7.0 Hz, 1H), 1.61 (d,  $J$  = 7.0 Hz, 3H), 1.46 (s, 9H), 1.33 (s, 12H);  **$^{13}\text{C}$  NMR** (100 MHz,  $\text{CDCl}_3$ ):  $\delta$  169.3, 140.9, 136.6, 134.5, 130.8, 130.1, 127.9, 126.9, 126.7,

126.4, 94.6, 83.9, 82.2, 52.0, 29.1, 28.8, 24.9, 24.0.

**HRMS** (ESI)  $m/z$  calcd. for  $\text{C}_{27}\text{H}_{35}\text{BNO}_3$   $[\text{M}+\text{H}]^+$  432.2705, found 432.2700.

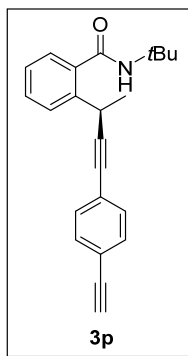

**(S)-N-(tert-butyl)-2-(4-(4-ethynylphenyl)but-3-yn-2-yl)benzamide (3p)**

According to general procedure A: Colorless oil, 47.2 mg (72%, 92% ee).

**HPLC** analysis: Chiralcel AD-H (*n*-hexane/*i*-PrOH = 90/10, flow rate 0.8 mL/min,  $\lambda$  = 254 nm),  $t_R$  (minor) = 6.53 min,  $t_R$  (major) = 12.38 min.

**$^1\text{H}$  NMR** (400 MHz,  $\text{CDCl}_3$ ):  $\delta$  7.70 (dd,  $J$  = 7.8, 1.2 Hz, 1H), 7.45-7.38 (m, 3H), 7.38-7.31 (m, 3H), 7.29-7.22 (m, 1H), 5.75 (s, 1H), 4.51 (q,  $J$  = 7.0 Hz, 1H), 3.14 (s, 1H), 1.60 (d,  $J$  = 7.1 Hz, 3H), 1.46 (s, 9H);  **$^{13}\text{C}$  NMR** (100 MHz,  $\text{CDCl}_3$ ):  $\delta$  169.2, 140.9, 136.5, 132.0, 131.5, 130.2, 127.9, 126.84, 126.79, 124.2, 121.4, 95.4, 83.3, 81.5, 78.7, 52.0, 29.0, 28.8, 24.0.

**HRMS** (ESI)  $m/z$  calcd. for  $\text{C}_{23}\text{H}_{24}\text{NO}$   $[\text{M}+\text{H}]^+$  330.1852, found 330.1848.

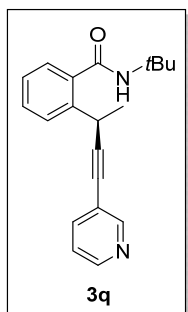

**(S)-N-(tert-butyl)-2-(4-(pyridin-3-yl)but-3-yn-2-yl)benzamide (3q)**

According to general procedure B: Colorless oil, 34.7 mg (57%, 86% ee).

**HPLC** analysis: Chiralcel AD-H (*n*-hexane/*i*-PrOH = 80/20, flow rate 0.8 mL/min,  $\lambda$  = 254 nm),  $t_R$  (minor) = 5.91 min,  $t_R$  (major) = 15.28 min.

**$^1\text{H}$  NMR** (400 MHz,  $\text{CDCl}_3$ ):  $\delta$  8.68-8.60 (m, 1H), 8.53-8.45 (m, 1H), 7.76-7.65 (m, 2H), 7.43 (td,  $J$  = 7.6, 1.6 Hz, 1H), 7.34 (dd,  $J$  = 7.6, 1.6 Hz, 1H), 7.30-7.15 (m, 2H), 5.77 (s, 1H), 4.55 (q,  $J$  = 7.0 Hz, 1H), 1.62 (d,  $J$  = 7.0 Hz, 3H), 1.48 (s, 9H);  **$^{13}\text{C}$  NMR** (100 MHz,  $\text{CDCl}_3$ ):  $\delta$  169.2, 152.3, 148.2, 140.8, 138.5, 136.5,



130.2, 127.9, 126.9, 126.8, 123.0, 120.8, 96.8, 78.7, 52.0, 28.9, 28.8, 24.0.

**HRMS** (ESI)  $m/z$  calcd. for  $C_{20}H_{23}N_2O$   $[M+H]^+$  307.1805, found 307.1800.

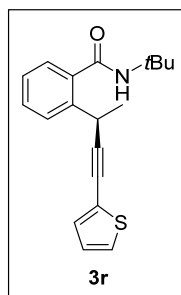

**(S)-N-(tert-butyl)-2-(4-(thiophen-2-yl)but-3-yn-2-yl)benzamide (3r)**

According to general procedure A: Colorless oil, 38.8 mg (63%, 95% ee).

**HPLC** analysis: Chiralcel AD-H (*n*-hexane/*i*-PrOH = 90/10, flow rate 0.8 mL/min,  $\lambda$  = 254 nm),  $t_R$  (minor) = 6.24 min,  $t_R$  (major) = 8.40 min.

**$^1H$  NMR** (400 MHz,  $CDCl_3$ ):  $\delta$  7.67 (dd,  $J$  = 8.0, 1.2 Hz, 1H), 7.45-7.38 (m, 1H), 7.33 (dd,  $J$  = 7.6, 1.6 Hz, 1H), 7.26 (td,  $J$  = 8.0, 1.2 Hz, 1H), 7.18 (dd,  $J$  = 5.2, 1.2 Hz, 1H), 7.14 (dd,  $J$  = 3.6, 1.2 Hz, 1H), 6.93 (dd,  $J$  = 5.2, 3.6 Hz, 1H), 5.75 (s, 1H), 4.50 (q,  $J$  = 7.0 Hz, 1H), 1.61 (d,  $J$  = 7.0 Hz, 3H), 1.47 (s, 9H);  **$^{13}C$**

**NMR** (100 MHz,  $CDCl_3$ ):  $\delta$  169.2, 140.7, 136.6, 131.3, 130.2, 127.9, 126.84, 126.80, 126.3, 123.7, 97.1, 75.2, 52.0, 29.2, 28.8, 23.8.

**HRMS** (ESI)  $m/z$  calcd. for  $C_{19}H_{22}NOS$   $[M+H]^+$  312.1417, found 312.1412.

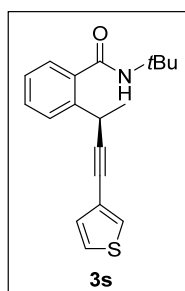

**(S)-N-(tert-butyl)-2-(4-(thiophen-2-yl)but-3-yn-2-yl)benzamide (3s)**

According to general procedure A: Colorless oil, 51.6 mg (83%, 94% ee).

**HPLC** analysis: Chiralcel AD-H (*n*-hexane/*i*-PrOH = 90/10, flow rate 0.8 mL/min,  $\lambda$  = 254 nm),  $t_R$  (minor) = 7.09 min,  $t_R$  (major) = 14.33 min.

**$^1H$  NMR** (400 MHz,  $CDCl_3$ ):  $\delta$  7.70 (dd,  $J$  = 8.0, 1.2 Hz, 1H), 7.41 (td,  $J$  = 7.6, 1.6 Hz, 1H), 7.36 (dd,  $J$  = 3.0, 1.2 Hz, 1H), 7.32 (dd,  $J$  = 7.6, 1.6 Hz, 1H), 7.27-7.21 (m, 2H), 7.07 (dd,  $J$  = 5.0, 1.2 Hz, 1H), 5.77 (s, 1H), 4.46 (q,  $J$  = 7.0 Hz, 1H), 1.60 (d,  $J$  = 7.0 Hz, 3H), 1.46 (s, 9H);  **$^{13}C$  NMR** (100 MHz,  $CDCl_3$ ):  $\delta$

169.3, 141.0, 136.6, 130.1, 130.0, 128.0, 127.9, 126.9, 126.7, 125.1, 122.6, 92.7, 77.1, 52.0, 29.0, 28.8, 24.0.

**HRMS** (ESI)  $m/z$  calcd. for  $C_{19}H_{22}NOS$   $[M+H]^+$  312.1417, found 312.1412.

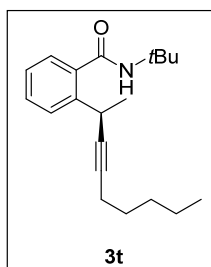

**(S)-N-(tert-butyl)-2-(non-3-yn-2-yl)benzamide (3t)**

According to general procedure B: White powder, 34.7 mg (58%, 94% ee).

**HPLC** analysis: Chiralcel AD-H (*n*-hexane/*i*-PrOH = 98/2, flow rate 0.8 mL/min,  $\lambda$  = 214 nm),  $t_R$  (minor) = 7.25 min,  $t_R$  (major) = 10.10 min.

**$^1H$  NMR** (400 MHz,  $CDCl_3$ ):  $\delta$  7.64 (dd,  $J$  = 8.0, 1.2 Hz, 1H), 7.38 (td,  $J$  = 7.6, 1.6 Hz, 1H), 7.31 (dd,  $J$  = 7.6, 1.6 Hz, 1H), 7.22 (td,  $J$  = 7.6, 1.2 Hz, 1H), 5.77 (s, 1H), 4.22-4.14 (m, 1H), 2.18 (td,  $J$  = 7.2, 2.3 Hz, 2H), 1.53-1.44 (m,

14H), 1.39-1.28 (m, 4H), 0.89 (t,  $J$  = 7.1 Hz, 3H);  **$^{13}C$  NMR** (100 MHz,  $CDCl_3$ ):  $\delta$  169.3, 141.7, 136.5, 129.9, 127.7, 126.8, 126.5, 83.5, 82.2, 51.9, 31.1, 28.8, 28.7, 28.5, 24.3, 22.2, 18.8, 14.0.

**HRMS** (ESI)  $m/z$  calcd. for  $C_{20}H_{30}NO$   $[M+H]^+$  300.2322, found 300.2317.

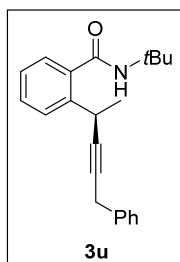

**(S)-N-(tert-butyl)-2-(5-phenylpent-3-yn-2-yl)benzamide (3u)**

According to general procedure B: Colorless oil, 38.4 mg (60%, 93% ee).

**HPLC** analysis: Chiralcel AD-H (*n*-hexane/*i*-PrOH = 95/5, flow rate 0.8 mL/min,  $\lambda = 214$  nm),  $t_R$  (minor) = 8.32 min,  $t_R$  (major) = 10.33 min.

**$^1\text{H}$  NMR** (400 MHz,  $\text{CDCl}_3$ ):  $\delta$  7.68 (dd,  $J = 8.0, 1.2$  Hz, 1H), 7.39 (td,  $J = 7.6, 1.6$  Hz, 1H), 7.35-7.28 (m, 5H), 7.25-7.19 (m, 2H), 5.72 (s, 1H), 4.34-4.25 (m, 1H), 3.63 (d,  $J = 2.4$  Hz, 2H), 1.54 (d,  $J = 7.0$  Hz, 3H), 1.45 (s, 9H);  **$^{13}\text{C}$  NMR** (100 MHz,  $\text{CDCl}_3$ ):  $\delta$  169.3, 141.5, 137.3, 136.5, 130.0, 128.4, 127.9, 127.8, 126.8, 126.6, 126.5, 85.9, 79.4, 51.9, 28.8, 28.5, 25.2, 24.3.

**HRMS** (ESI)  $m/z$  calcd. for  $\text{C}_{22}\text{H}_{26}\text{NO}$   $[\text{M}+\text{H}]^+$  320.2009, found 320.2006.

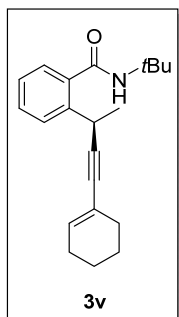

**(S)-N-(tert-butyl)-2-(4-(cyclohex-1-en-1-yl)but-3-yn-2-yl)benzamide (3v)**

According to general procedure A: Colorless oil, 39.2 mg (64%, 90% ee).

**HPLC** analysis: Chiralcel AD-H (*n*-hexane/*i*-PrOH = 98/2, flow rate 0.8 mL/min,  $\lambda = 214$  nm),  $t_R$  (minor) = 8.38 min,  $t_R$  (major) = 12.18 min.

**$^1\text{H}$  NMR** (400 MHz,  $\text{CDCl}_3$ ):  $\delta$  7.64 (dd,  $J = 8.0, 1.2$  Hz, 1H), 7.38 (td,  $J = 7.6, 1.6$  Hz, 1H), 7.31 (dd,  $J = 7.6, 1.6$  Hz, 1H), 7.22 (td,  $J = 7.4, 1.2$  Hz, 1H), 6.04 (dt,  $J = 4.0, 2.0$  Hz, 1H), 5.75 (s, 1H), 4.33 (q,  $J = 7.0$  Hz, 1H), 2.13-2.03 (m, 4H), 1.67-1.55 (m, 4H), 1.52 (d,  $J = 7.0$  Hz, 3H), 1.46 (s, 9H);  **$^{13}\text{C}$  NMR** (100

MHz,  $\text{CDCl}_3$ ):  $\delta$  169.3, 141.3, 136.5, 133.9, 130.0, 127.8, 126.8, 126.6, 120.8, 90.3, 83.9, 51.9, 29.5, 28.9, 28.8, 25.6, 24.2, 22.4, 21.6.

**HRMS** (ESI)  $m/z$  calcd. for  $\text{C}_{21}\text{H}_{28}\text{NO}$   $[\text{M}+\text{H}]^+$  310.2165, found 310.2161.

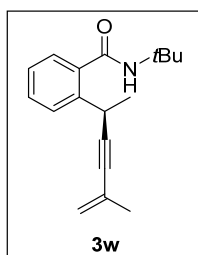

**(S)-N-(tert-butyl)-2-(5-methylhex-5-en-3-yn-2-yl)benzamide (3w)**

According to general procedure B: Colorless oil, 44.0 mg (81%, 94% ee).

**HPLC** analysis: Chiralcel AD-H (*n*-hexane/*i*-PrOH = 98/2, flow rate 0.8 mL/min,  $\lambda = 214$  nm),  $t_R$  (minor) = 7.51 min,  $t_R$  (major) = 10.03 min.

**$^1\text{H}$  NMR** (400 MHz,  $\text{CDCl}_3$ ):  $\delta$  7.63 (dd,  $J = 8.0, 1.2$  Hz, 1H), 7.40 (td,  $J = 7.6, 1.6$  Hz, 1H), 7.31 (dd,  $J = 7.6, 1.6$  Hz, 1H), 7.23 (td,  $J = 7.4, 1.2$  Hz, 1H), 5.73 (s, 1H), 5.26-5.13 (m, 2H), 4.35 (q,  $J = 7.0$  Hz, 1H), 1.88 (t,  $J = 1.2$  Hz, 3H),

1.53 (d,  $J = 7.0$  Hz, 3H), 1.47 (s, 9H);  **$^{13}\text{C}$  NMR** (100 MHz,  $\text{CDCl}_3$ ):  $\delta$  169.2, 141.1, 136.5, 130.1, 127.8, 127.1, 126.8, 126.6, 120.9, 92.2, 83.3, 51.9, 28.9, 28.8, 24.1, 23.8.

**HRMS** (ESI)  $m/z$  calcd. for  $\text{C}_{18}\text{H}_{24}\text{NO}$   $[\text{M}+\text{H}]^+$  270.1852, found 270.1848.

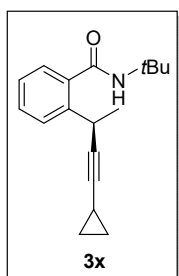

**(S)-N-(tert-butyl)-2-(4-cyclopropylbut-3-yn-2-yl)benzamide (3x)**

According to general procedure B: Colorless oil, 45.9 mg (85%, 94% ee).

**HPLC** analysis: Chiralcel AD-H (*n*-hexane/*i*-PrOH = 95/5, flow rate 0.8 mL/min,  $\lambda = 214$  nm),  $t_R$  (minor) = 6.98 min,  $t_R$  (major) = 10.08 min.

**$^1\text{H}$  NMR** (400 MHz,  $\text{CDCl}_3$ ):  $\delta$  7.60 (d,  $J = 7.8$  Hz, 1H), 7.37 (td,  $J = 7.6, 1.6$  Hz, 1H), 7.33-7.26 (m, 1H), 7.21 (td,  $J = 7.6, 1.2$  Hz, 1H), 5.79 (s, 1H), 4.15 (qd,  $J = 7.0, 2.0$  Hz, 1H), 1.47 (m,  $J = 6.0$  Hz, 12H), 1.25-1.19 (m, 1H), 0.74-0.67 (m, 2H), 0.67-0.58 (m, 2H);  **$^{13}\text{C}$  NMR** (100 MHz,  $\text{CDCl}_3$ ):  $\delta$  169.7, 141.8, 136.9, 130.3, 128.0, 127.2,

126.9, 85.4, 79.2, 52.3, 29.2, 28.8, 24.6, 8.5, 8.4, 0.0.

**HRMS** (ESI)  $m/z$  calcd. for  $C_{18}H_{24}NO$   $[M+H]^+$  270.1852, found 270.1848.

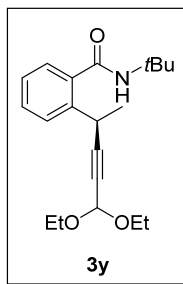

**(S)-N-(tert-butyl)-2-(5,5-diethoxypent-3-yn-2-yl)benzamide (3y)**

According to general procedure A: Colorless oil, 62.5 mg (94%, 94% ee).

**HPLC** analysis: Chiralcel IC (*n*-hexane/*i*-PrOH = 95/5, flow rate 0.8 mL/min,  $\lambda$  = 214 nm),  $t_R$  (minor) = 14.65 min,  $t_R$  (major) = 19.40 min.

**$^1H$  NMR** (400 MHz,  $CDCl_3$ ):  $\delta$  7.64 (dd,  $J$  = 7.8, 1.2 Hz, 1H), 7.39 (td,  $J$  = 7.6, 1.6 Hz, 1H), 7.30 (dd,  $J$  = 7.6, 1.6 Hz, 1H), 7.23 (td,  $J$  = 7.4, 1.2 Hz, 1H), 5.68 (s, 1H), 5.30 (d,  $J$  = 1.6 Hz, 1H), 4.34 (qd,  $J$  = 7.0, 1.6 Hz, 1H), 3.80-3.68 (m, 2H), 3.63-3.52 (m, 2H), 1.53 (d,  $J$  = 7.0 Hz, 3H), 1.46 (s, 9H), 1.23 (td,  $J$  = 7.1,

2.0 Hz, 6H);  **$^{13}C$  NMR** (100 MHz,  $CDCl_3$ ):  $\delta$  169.1, 140.6, 136.4, 130.1, 128.0, 126.72, 126.67, 91.5, 89.1, 77.2, 60.72, 60.70, 52.0, 28.8, 28.4, 24.0, 15.11, 15.10.

**HRMS** (ESI)  $m/z$  calcd. for  $C_{20}H_{29}NO_3Na$   $[M+Na]^+$  354.2040, found 354.2036.

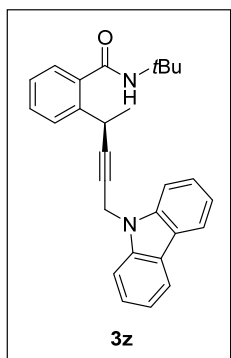

**(S)-2-(5-(9H-carbazol-9-yl)pent-3-yn-2-yl)-N-(tert-butyl)benzamide (3z)**

According to general procedure A: Yellow powder, 65.7 mg (81%, 89% ee).

**HPLC** analysis: Chiralcel AD-H (*n*-hexane/*i*-PrOH = 90/10, flow rate 0.8 mL/min,  $\lambda$  = 214 nm),  $t_R$  (major) = 10.66 min,  $t_R$  (minor) = 13.63 min.

**$^1H$  NMR** (400 MHz,  $CDCl_3$ ):  $\delta$  8.08 (dt,  $J$  = 7.8, 1.0 Hz, 2H), 7.52-7.39 (m, 5H), 7.32-7.22 (m, 4H), 7.17 (td,  $J$  = 7.4, 1.2 Hz, 1H), 5.54 (s, 1H), 5.05 (d,  $J$  = 2.1 Hz, 2H), 4.22 (dt,  $J$  = 7.0, 2.1 Hz, 1H), 1.43 (d,  $J$  = 7.0 Hz, 3H), 1.34 (s, 9H);  **$^{13}C$  NMR** (100 MHz,  $CDCl_3$ ):  $\delta$  169.2, 140.8, 140.0, 136.4, 130.0, 127.9, 126.7, 125.8, 123.2, 120.4, 119.3, 109.0, 87.8, 75.8, 51.9, 32.9, 28.7,

28.3, 24.1.

**HRMS** (ESI)  $m/z$  calcd. for  $C_{28}H_{29}N_2O$   $[M+H]^+$  409.2274, found 409.2269.

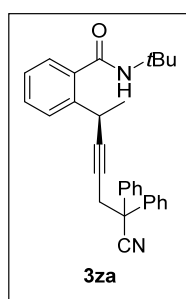

**(S)-N-(tert-butyl)-2-(6-cyano-6,6-diphenylhex-3-yn-2-yl)benzamide (3za)**

According to general procedure A: Yellow oil, 42.4 mg (49%, 88% ee).

**HPLC** analysis: Chiralcel AD-H (*n*-hexane/*i*-PrOH = 99/1, flow rate 0.8 mL/min,  $\lambda$  = 214 nm),  $t_R$  (minor) = 48.66 min,  $t_R$  (major) = 52.79 min.

**$^1H$  NMR** (400 MHz,  $CDCl_3$ ):  $\delta$  7.41-7.30 (m, 11H), 7.29-7.23 (m, 2H), 7.20-7.15 (m, 1H), 5.62 (s, 1H), 4.20-4.11 (m, 1H), 3.35-3.12 (m, 2H), 1.41 (s, 9H), 1.38 (d,  $J$  = 6.9 Hz, 3H);  **$^{13}C$  NMR** (100 MHz,  $CDCl_3$ ):  $\delta$  169.3, 140.8, 139.19, 139.16, 136.3, 130.0, 128.8, 128.20, 128.16, 127.9, 127.2, 126.6, 126.5, 121.9,

88.8, 76.4, 51.9, 51.7, 31.4, 28.8, 28.3, 23.9.

**HRMS** (ESI)  $m/z$  calcd. for  $C_{30}H_{31}N_2O$   $[M+H]^+$  435.2431, found 435.2427.

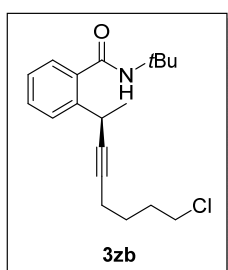

**(S)-N-(tert-butyl)-2-(8-chlorooct-3-yn-2-yl)benzamide (3zb)**

According to general procedure B: Colorless oil, 52.6 mg (82%, 93% ee).

**HPLC** analysis: Chiralcel AD-H (*n*-hexane/*i*-PrOH = 95/5, flow rate 0.8 mL/min,  $\lambda$  = 214 nm),  $t_R$  (minor) = 8.70 min,  $t_R$  (major) = 11.37 min.

**$^1\text{H}$  NMR** (400 MHz,  $\text{CDCl}_3$ ):  $\delta$  7.63 (dd,  $J$  = 8.0, 1.2 Hz, 1H), 7.39 (td,  $J$  = 7.6, 1.5 Hz, 1H), 7.30 (dd,  $J$  = 7.6, 1.6 Hz, 1H), 7.22 (td,  $J$  = 7.4, 1.2 Hz, 1H), 5.75 (s, 1H), 4.29-4.16 (m, 1H), 3.55 (t,  $J$  = 6.6 Hz, 2H), 2.24 (td,  $J$  = 6.9, 2.4 Hz, 2H), 1.94-1.81 (m, 2H), 1.66 (dt,  $J$  = 14.6, 7.2 Hz, 2H), 1.48 (d,  $J$  = 7.0 Hz, 3H), 1.46 (s, 9H);  **$^{13}\text{C}$  NMR** (100 MHz,  $\text{CDCl}_3$ ):  $\delta$  169.3, 141.6, 136.5, 130.0, 127.7, 126.8, 126.5, 84.3, 81.1, 51.9, 44.6, 31.6, 28.8, 28.4, 26.1, 24.4, 18.2.

**HRMS** (ESI)  $m/z$  calcd. for  $\text{C}_{19}\text{H}_{27}^{34.9689}\text{ClNO}$   $[\text{M}+\text{H}]^+$  320.1776, found 320.1772; calcd. for  $\text{C}_{19}\text{H}_{27}^{36.9659}\text{ClNO}$   $[\text{M}+\text{H}]^+$  322.1746, found 322.1742.

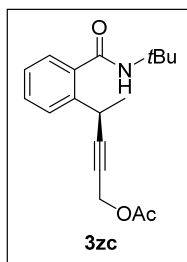

**(S)-4-(2-(*tert*-butylcarbamoyl)phenyl)pent-2-yn-1-yl acetate (3zc)**

According to general procedure A: Colorless oil, 41.6 mg (69%, 93% ee).

**HPLC** analysis: Chiralcel AD-H (*n*-hexane/*i*-PrOH = 90/10, flow rate 0.8 mL/min,  $\lambda$  = 214 nm),  $t_R$  (minor) = 10.38 min,  $t_R$  (major) = 17.83 min.

**$^1\text{H}$  NMR** (400 MHz,  $\text{CDCl}_3$ ):  $\delta$  7.61 (dd,  $J$  = 8.0, 1.2 Hz, 1H), 7.40 (td,  $J$  = 7.6, 1.6 Hz, 1H), 7.31 (dd,  $J$  = 7.6, 1.6 Hz, 1H), 7.24 (td,  $J$  = 7.6, 1.2 Hz, 1H), 5.72 (s, 1H), 4.70 (d,  $J$  = 2.1 Hz, 2H), 4.32 (dt,  $J$  = 7.1, 2.1 Hz, 1H), 2.08 (s, 3H),

1.52 (d,  $J$  = 7.1 Hz, 3H), 1.46 (s, 9H);  **$^{13}\text{C}$  NMR** (100 MHz,  $\text{CDCl}_3$ ):  $\delta$  170.3, 169.1, 140.6, 136.5, 130.1, 127.8, 126.8, 90.5, 75.5, 52.8, 52.0, 28.8, 28.4, 23.8, 20.8.

**HRMS** (ESI)  $m/z$  calcd. for  $\text{C}_{18}\text{H}_{24}\text{NO}_3$   $[\text{M}+\text{H}]^+$  302.1751, found 302.1746.

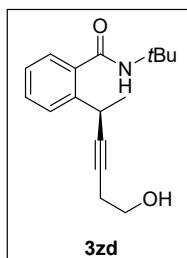

**(S)-*N*-(*tert*-butyl)-2-(6-hydroxyhex-3-yn-2-yl)benzamide (3zd)**

According to general procedure B: Colorless oil, 50.7 mg (92%, 93% ee).

**HPLC** analysis: Chiralcel AD-H (*n*-hexane/*i*-PrOH = 80/20, flow rate 0.8 mL/min,  $\lambda$  = 214 nm),  $t_R$  (minor) = 5.55 min,  $t_R$  (major) = 7.97 min.

**$^1\text{H}$  NMR** (400 MHz,  $\text{CDCl}_3$ ):  $\delta$  7.61 (dd,  $J$  = 7.8, 1.2 Hz, 1H), 7.39 (td,  $J$  = 7.6, 1.6 Hz, 1H), 7.30 (dd,  $J$  = 7.6, 1.6 Hz, 1H), 7.23 (td,  $J$  = 7.6, 1.2 Hz, 1H), 5.75 (s, 1H), 4.28-4.17 (m, 1H), 3.67 (q,  $J$  = 6.0 Hz, 2H), 2.45 (td,  $J$  = 6.4, 2.4 Hz,

2H), 2.17 (s, 1H), 1.50 (d,  $J$  = 7.0 Hz, 3H), 1.46 (s, 9H);  **$^{13}\text{C}$  NMR** (100 MHz,  $\text{CDCl}_3$ ):  $\delta$  169.3, 141.3, 136.5, 130.1, 127.6, 126.8, 126.6, 85.8, 78.3, 61.2, 52.0, 28.8, 28.4, 24.1, 23.3.

**HRMS** (ESI)  $m/z$  calcd. for  $\text{C}_{17}\text{H}_{24}\text{NO}_2$   $[\text{M}+\text{H}]^+$  274.1802, found 274.1797.

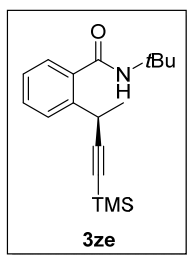

**(R)-*N*-(*tert*-butyl)-2-(4-(trimethylsilyl)but-3-yn-2-yl)benzamide (3ze)**

According to general procedure B: White powder, 46.9 mg (78%, 97% ee).

**HPLC** analysis: Chiralcel AS3 (*n*-hexane/*i*-PrOH = 99/1, flow rate 0.6 mL/min,  $\lambda$  = 214 nm),  $t_R$  (minor) = 7.52 min,  $t_R$  (major) = 7.98 min.

**$^1\text{H}$  NMR** (400 MHz,  $\text{CDCl}_3$ ):  $\delta$  7.65 (dd,  $J$  = 7.8, 1.2 Hz, 1H), 7.40 (td,  $J$  = 7.6, 1.6 Hz, 1H), 7.31 (dd,  $J$  = 7.6, 1.6 Hz, 1H), 7.23 (td,  $J$  = 7.6, 1.2 Hz, 1H), 5.74 (s, 1H), 4.25 (q,  $J$  = 7.0 Hz, 1H), 1.51 (d,  $J$  = 7.0 Hz, 3H), 1.46 (s, 9H), 0.16 (s,

9H);  $^{13}\text{C}$  NMR (100 MHz,  $\text{CDCl}_3$ ):  $\delta$  169.2, 140.8, 136.5, 130.1, 127.8, 126.8, 126.7, 110.1, 85.9, 52.0, 29.4, 28.8, 24.3, 0.2.

HRMS (ESI)  $m/z$  calcd. for  $\text{C}_{18}\text{H}_{28}\text{NOSi}$   $[\text{M}+\text{H}]^+$  302.1935, found 302.1930.

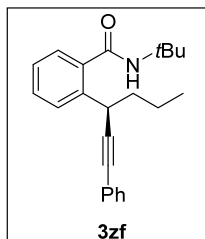

**(S)-N-(tert-butyl)-2-(1-phenylhex-1-yn-3-yl)benzamide (3zf)**

According to general procedure A: Colorless oil, 52.1 mg (78%, 94% ee).

HPLC analysis: Chiralcel AD-H (*n*-hexane/*i*-PrOH = 90/10, flow rate 0.8 mL/min,  $\lambda$  = 254 nm),  $t_R$  (minor) = 5.51 min,  $t_R$  (major) = 7.57 min.

$^1\text{H}$  NMR (400 MHz,  $\text{CDCl}_3$ ):  $\delta$  7.69 (dd,  $J$  = 7.8, 1.2 Hz, 1H), 7.44-7.36 (m, 3H), 7.32 (dd,  $J$  = 7.6, 1.6 Hz, 1H), 7.29-7.21 (m, 4H), 5.74 (s, 1H), 4.39 (dd,  $J$  = 8.8, 5.7 Hz, 1H), 1.89-1.78 (m, 2H), 1.69-1.52 (m, 2H), 1.46 (s, 9H), 0.96 (t,  $J$  = 7.3 Hz, 3H);  $^{13}\text{C}$  NMR (100 MHz,  $\text{CDCl}_3$ ):  $\delta$  169.3, 140.1, 136.9, 131.6, 129.9, 128.4, 128.2, 127.8, 126.8, 126.6, 123.8, 92.1, 83.0, 51.9, 40.2, 34.4, 28.8, 21.0, 13.8.

HRMS (ESI)  $m/z$  calcd. for  $\text{C}_{23}\text{H}_{28}\text{NO}$   $[\text{M}+\text{H}]^+$  334.2165, found 334.2161.

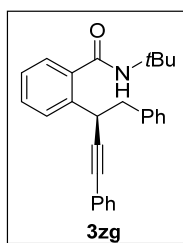

**(S)-N-(tert-butyl)-2-(1,4-diphenylbut-3-yn-2-yl)benzamide (3zg)**

According to general procedure A: Colorless oil, 43.7 mg (58%, 94% ee).

HPLC analysis: Chiralcel AD-H (*n*-hexane/*i*-PrOH = 90/10, flow rate 0.8 mL/min,  $\lambda$  = 254 nm),  $t_R$  (minor) = 6.52 min,  $t_R$  (major) = 9.66 min.

$^1\text{H}$  NMR (400 MHz,  $\text{CDCl}_3$ ):  $\delta$  7.70 (dd,  $J$  = 8.0, 1.2 Hz, 1H), 7.43-7.37 (m, 1H), 7.36-7.30 (m, 3H), 7.29-7.18 (m, 9H), 5.56 (s, 1H), 4.62 (dd,  $J$  = 9.2, 5.3 Hz, 1H), 3.29 (dd,  $J$  = 12.9, 5.3 Hz, 1H), 3.01 (dd,  $J$  = 12.9, 9.2 Hz, 1H), 1.45 (s, 9H);  $^{13}\text{C}$  NMR (100 MHz,  $\text{CDCl}_3$ ):  $\delta$  169.3, 139.5, 139.3, 136.9, 131.6, 129.9, 129.7, 128.9, 128.2, 128.1, 127.8, 126.9, 126.7, 126.4, 123.7, 91.4, 84.0, 51.9, 44.6, 37.3, 28.8.

HRMS (ESI)  $m/z$  calcd. for  $\text{C}_{27}\text{H}_{28}\text{NO}$   $[\text{M}+\text{H}]^+$  382.2165, found 382.2160.

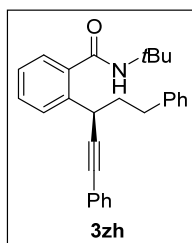

**(R)-N-(tert-butyl)-2-(1,5-diphenylpent-1-yn-3-yl)benzamide (3zh)**

According to general procedure A: Colorless oil, 66.8 mg (85%, 92% ee).

HPLC analysis: Chiralcel AD-H (*n*-hexane/*i*-PrOH = 96/4, flow rate 0.8 mL/min,  $\lambda$  = 254 nm),  $t_R$  (minor) = 17.78 min,  $t_R$  (major) = 20.22 min.

$^1\text{H}$  NMR (400 MHz,  $\text{CDCl}_3$ ):  $\delta$  7.71 (dd,  $J$  = 8.0, 1.2 Hz, 1H), 7.48-7.38 (m, 3H), 7.35-7.20 (m, 9H), 7.18-7.12 (m, 1H), 5.71 (s, 1H), 4.41 (dd,  $J$  = 9.4, 5.2 Hz, 1H), 2.99-2.89 (m, 1H), 2.87-2.77 (m, 1H), 2.29-2.06 (m, 2H), 1.41 (s, 9H);  $^{13}\text{C}$  NMR (100 MHz,  $\text{CDCl}_3$ ):  $\delta$  169.1, 141.7, 139.5, 136.9, 131.7, 130.0, 128.6, 128.39, 128.38, 128.3, 127.9, 127.0, 126.8, 125.9, 123.6, 91.6, 83.7, 51.9, 39.5, 34.4, 34.1, 28.8.

HRMS (ESI)  $m/z$  calcd. for  $\text{C}_{28}\text{H}_{30}\text{NO}$   $[\text{M}+\text{H}]^+$  396.2322, found 396.2317.

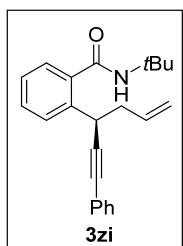

**(S)-N-(tert-butyl)-2-(1-phenylhex-5-en-1-yn-3-yl)benzamide (3zi)**

According to general procedure A: Colorless oil, 51.7 mg (78%, 96% ee).

**HPLC analysis:** Chiralcel AD-H (*n*-hexane/*i*-PrOH = 90/10, flow rate 0.8 mL/min,  $\lambda = 254$  nm),  $t_R$  (minor) = 5.60 min,  $t_R$  (major) = 9.17 min.

**$^1\text{H NMR}$**  (400 MHz,  $\text{CDCl}_3$ ):  $\delta$  7.69 (dd,  $J = 7.9, 1.2$  Hz, 1H), 7.44-7.37 (m, 3H), 7.33 (dd,  $J = 7.6, 1.5$  Hz, 1H), 7.30-7.22 (m, 4H), 6.04-5.85 (m, 1H), 5.74 (s, 1H), 5.19-5.00 (m, 2H), 4.48 (dd,  $J = 8.6, 5.4$  Hz, 1H), 2.75-2.47 (m, 2H), 1.46 (s, 9H);  **$^{13}\text{C NMR}$**  (100 MHz,  $\text{CDCl}_3$ ):  $\delta$  169.2, 139.2, 136.8, 135.5, 131.7, 129.9, 128.6, 128.2, 127.9, 126.83, 126.82, 123.6, 117.2, 91.4, 83.5, 52.0, 42.1, 34.7, 28.8.

**HRMS** (ESI)  $m/z$  calcd. for  $\text{C}_{23}\text{H}_{26}\text{NO}$   $[\text{M}+\text{H}]^+$  332.2009, found 332.2003.

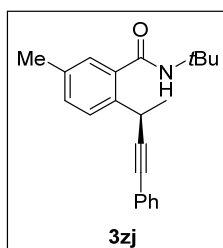

**(S)-N-(tert-butyl)-5-methyl-2-(4-phenylbut-3-yn-2-yl)benzamide (3zj)**

According to general procedure A: Colorless oil, 53.9 mg (85%, 93% ee).

**HPLC analysis:** Chiralcel AD-H (*n*-hexane/*i*-PrOH = 90/10, flow rate 0.8 mL/min,  $\lambda = 254$  nm),  $t_R$  (minor) = 6.26 min,  $t_R$  (major) = 14.59 min.

**$^1\text{H NMR}$**  (400 MHz,  $\text{CDCl}_3$ ):  $\delta$  7.58 (d,  $J = 7.9$  Hz, 1H), 7.42-7.36 (m, 2H), 7.29-7.20 (m, 4H), 7.14 (s, 1H), 5.77 (s, 1H), 4.42 (q,  $J = 7.0$  Hz, 1H), 2.33 (s, 3H), 1.59 (d,  $J = 7.0$  Hz, 3H), 1.46 (s, 9H);  **$^{13}\text{C NMR}$**  (100 MHz,  $\text{CDCl}_3$ ):

$\delta$  169.4, 138.0, 136.52, 136.45, 131.6, 130.8, 128.2, 127.8, 127.4, 123.7, 93.4, 82.0, 51.9, 28.8, 28.7, 24.1, 20.9.

**HRMS** (ESI)  $m/z$  calcd. for  $\text{C}_{22}\text{H}_{26}\text{NO}$   $[\text{M}+\text{H}]^+$  320.2009, found 320.2005.

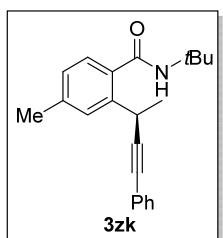

**(S)-N-(tert-butyl)-4-methyl-2-(4-phenylbut-3-yn-2-yl)benzamide (3zk)**

According to general procedure A: Colorless oil, 38.2 mg (60%, 90% ee).

**HPLC analysis:** Chiralcel AD-H (*n*-hexane/*i*-PrOH = 90/10, flow rate 0.8 mL/min,  $\lambda = 254$  nm),  $t_R$  (minor) = 5.82 min,  $t_R$  (major) = 11.10 min.

**$^1\text{H NMR}$**  (400 MHz,  $\text{CDCl}_3$ ):  $\delta$  7.50 (d,  $J = 1.1$  Hz, 1H), 7.44-7.39 (m, 2H), 7.30-7.22 (m, 4H), 7.07-7.02 (m, 1H), 5.76 (s, 1H), 4.49 (q,  $J = 7.0$  Hz, 1H), 2.38 (s, 3H), 1.60 (d,  $J = 7.0$  Hz, 3H), 1.46 (s, 9H);  **$^{13}\text{C NMR}$**  (100 MHz,  $\text{CDCl}_3$ ):  $\delta$  169.4, 141.1, 140.2, 133.8, 131.6, 128.5, 128.2, 127.8, 127.4, 126.9, 123.7, 93.4, 82.0, 51.9, 28.84, 28.82, 24.1, 21.5.

**HRMS** (ESI)  $m/z$  calcd. for  $\text{C}_{22}\text{H}_{26}\text{NO}$   $[\text{M}+\text{H}]^+$  320.2009, found 320.2006.

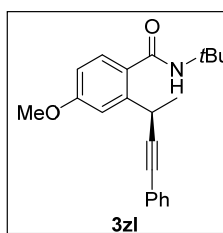

**(S)-N-(tert-butyl)-4-methoxy-2-(4-phenylbut-3-yn-2-yl)benzamide (3zl)**

According to general procedure A: White powder, 36.9 mg (55%, 90% ee).

**HPLC analysis:** Chiralcel AD-H (*n*-hexane/*i*-PrOH = 90/10, flow rate 0.8 mL/min,  $\lambda = 254$  nm),  $t_R$  (minor) = 8.04 min,  $t_R$  (major) = 14.57 min.

**$^1\text{H NMR}$**  (400 MHz,  $\text{CDCl}_3$ ):  $\delta$  7.44-7.37 (m, 2H), 7.30-7.22 (m, 5H), 6.75 (dd,  $J = 8.4, 2.6$  Hz, 1H), 5.75 (s, 1H), 4.57 (q,  $J = 7.0$  Hz, 1H), 3.83 (s, 3H), 1.60 (d,  $J = 7.0$  Hz, 3H), 1.46 (s, 9H);  **$^{13}\text{C NMR}$**  (100 MHz,  $\text{CDCl}_3$ ):  $\delta$  169.1, 160.8, 143.5, 131.6, 129.1, 128.6, 128.2, 127.8, 123.6, 113.6, 111.6, 93.1, 82.2, 55.3, 51.8, 29.1, 28.8, 24.1.

**HRMS** (ESI)  $m/z$  calcd. for  $\text{C}_{22}\text{H}_{26}\text{NO}_2$   $[\text{M}+\text{H}]^+$  336.1958, found 336.1954.

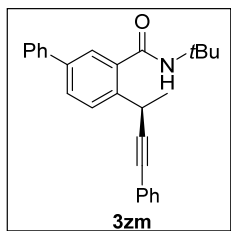

**(S)-N-(tert-butyl)-4-(4-phenylbut-3-yn-2-yl)-[1,1'-biphenyl]-3-carboxamide (3zm)**

According to general procedure A: White powder, 62.1 mg (81%, 92% ee).

**HPLC** analysis: Chiralcel AD-H (*n*-hexane/*i*-PrOH = 95/5, flow rate 0.8 mL/min,  $\lambda$  = 254 nm),  $t_R$  (minor) = 13.86 min,  $t_R$  (major) = 38.41 min.

**<sup>1</sup>H NMR** (400 MHz, CDCl<sub>3</sub>):  $\delta$  7.78 (d,  $J$  = 8.0 Hz, 1H), 7.62 (dd,  $J$  = 8.1, 2.1 Hz, 1H), 7.59-7.53 (m, 3H), 7.47-7.40 (m, 4H), 7.38-7.32 (m, 1H), 7.30-7.25 (m, 3H), 5.82 (s, 1H), 4.49 (q,  $J$  = 7.0 Hz, 1H), 1.65 (d,  $J$  = 7.0 Hz, 3H), 1.48 (s, 9H); **<sup>13</sup>C NMR** (100 MHz, CDCl<sub>3</sub>):  $\delta$  169.2, 140.2, 140.0, 139.9, 137.1, 131.6, 128.9, 128.7, 128.4, 128.3, 127.9, 127.6, 127.1, 125.6, 123.6, 93.1, 82.2, 52.1, 28.8, 24.0.

**HRMS** (ESI)  $m/z$  calcd. for C<sub>27</sub>H<sub>28</sub>NO [M+H]<sup>+</sup> 382.2165, found 382.2161.

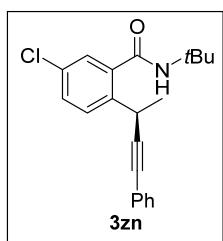

**(S)-N-(tert-butyl)-5-chloro-2-(4-phenylbut-3-yn-2-yl)benzamide (3zn)**

According to general procedure A: Colorless oil, 56.4 mg (83%, 93% ee).

**HPLC** analysis: Chiralcel AD-H (*n*-hexane/*i*-PrOH = 90/10, flow rate 0.8 mL/min,  $\lambda$  = 254 nm),  $t_R$  (minor) = 5.79 min,  $t_R$  (major) = 10.13 min.

**<sup>1</sup>H NMR** (400 MHz, CDCl<sub>3</sub>):  $\delta$  7.69 (d,  $J$  = 2.0 Hz, 1H), 7.45-7.38 (m, 2H), 7.32-7.25 (m, 4H), 7.21 (dd,  $J$  = 8.0, 2.0 Hz, 1H), 5.78 (s, 1H), 4.48 (q,  $J$  = 7.0 Hz, 1H), 1.59 (d,  $J$  = 7.0 Hz, 3H), 1.45 (s, 9H); **<sup>13</sup>C NMR** (101 MHz, CDCl<sub>3</sub>):  $\delta$  168.3, 143.2, 136.0, 134.9, 131.6, 128.32, 128.27, 128.1, 128.0, 126.9, 123.3, 92.2, 82.7, 52.1, 28.9, 28.8, 23.9.

**HRMS** (ESI)  $m/z$  calcd. for C<sub>21</sub>H<sub>23</sub><sup>34,9689</sup>ClNO [M+H]<sup>+</sup> 340.1463, found 340.1459; calcd. for C<sub>21</sub>H<sub>23</sub><sup>36,9659</sup>ClNO [M+H]<sup>+</sup> 342.1433, found 342.1429.

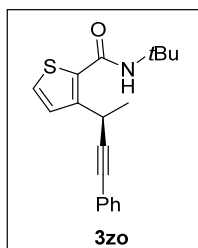

**(S)-N-(tert-butyl)-3-(4-phenylbut-3-yn-2-yl)thiophene-2-carboxamide (3zo)**

According to general procedure A: Colorless oil, 42.7 mg (69%, 88% ee).

**HPLC** analysis: Chiralcel AD-H (*n*-hexane/*i*-PrOH = 98/2, flow rate 0.8 mL/min,  $\lambda$  = 254 nm),  $t_R$  (minor) = 7.37 min,  $t_R$  (major) = 7.95 min.

**<sup>1</sup>H NMR** (400 MHz, CDCl<sub>3</sub>):  $\delta$  7.39 (dd,  $J$  = 6.7, 3.0 Hz, 2H), 7.33-7.18 (m, 5H), 6.02 (s, 1H), 4.74 (q,  $J$  = 7.1 Hz, 1H), 1.61 (d,  $J$  = 7.1 Hz, 3H), 1.45 (s, 9H); **<sup>13</sup>C NMR** (100 MHz, CDCl<sub>3</sub>):  $\delta$  162.1, 145.5, 132.2, 131.6, 129.0, 128.2, 127.9, 126.1, 123.4, 92.4, 82.1, 52.1, 28.9, 26.4, 23.0.

**HRMS** (ESI)  $m/z$  calcd. for C<sub>19</sub>H<sub>22</sub>NOS [M+H]<sup>+</sup> 312.1417, found 312.1413.

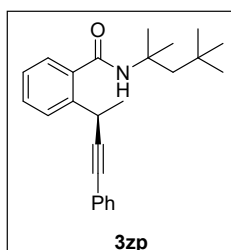

**(S)-2-(4-phenylbut-3-yn-2-yl)-N-(2,4,4-trimethylpentan-2-yl)benzamide (3zp)**

According to general procedure A: Colorless oil, 60.9 mg (84%, 93% ee).

**HPLC** analysis: Chiralcel AD-H (*n*-hexane/*i*-PrOH = 98/2, flow rate 0.8 mL/min,  $\lambda$  = 254 nm),  $t_R$  (minor) = 12.87 min,  $t_R$  (major) = 20.06 min.

**<sup>1</sup>H NMR** (400 MHz, CDCl<sub>3</sub>): δ 7.73 (dd, *J* = 8.0, 1.2 Hz, 1H), 7.44-7.38 (m, 3H), 7.32 (dd, *J* = 7.6, 1.6 Hz, 1H), 7.28 -7.22 (m, 4H), 5.74 (s, 1H), 4.53 (q, *J* = 7.0 Hz, 1H), 1.92 (d, *J* = 15.0 Hz, 1H), 1.80 (d, *J* = 15.0 Hz, 1H), 1.61 (d, *J* = 7.0 Hz, 3H), 1.54 (s, 3H), 1.51 (s, 3H), 1.05 (s, 9H); **<sup>13</sup>C NMR** (100 MHz, CDCl<sub>3</sub>): δ 168.9, 141.5, 136.6, 131.6, 130.1, 128.2, 128.1, 127.8, 126.7, 126.5, 123.7, 93.3, 81.9, 56.0, 51.9, 31.7, 31.6, 29.2, 29.1, 28.9, 24.3.

**HRMS** (ESI) *m/z* calcd. for C<sub>25</sub>H<sub>32</sub>NO [M+H]<sup>+</sup> 362.2478, found 362.2474.

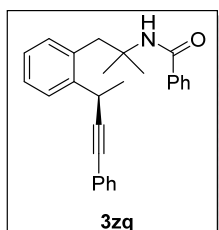

**(S)-N-(2-methyl-1-(2-(4-phenylbut-3-yn-2-yl)phenyl)propan-2-yl)benzamide (3zq)**

According to general procedure A: Colorless oil, 52.8 mg (69%, 89% ee).

**HPLC** analysis: Chiralcel AD-H (*n*-hexane/*i*-PrOH = 96/4, flow rate 0.8 mL/min, λ = 254 nm), *t<sub>R</sub>* (major) = 16.54 min, *t<sub>R</sub>* (minor) = 19.30 min.

**<sup>1</sup>H NMR** (400 MHz, CDCl<sub>3</sub>): δ 7.73-7.66 (m, 3H), 7.46-7.41 (m, 1H), 7.39-7.33 (m, 4H), 7.28-7.23 (m, 4H), 7.15-7.09 (m, 2H), 5.84 (s, 1H), 4.38 (q, *J* = 7.0 Hz, 1H), 3.32-3.24 (m, 2H), 1.56 (s, 3H), 1.51 (d, *J* = 7.0 Hz, 3H), 1.47 (s, 3H); **<sup>13</sup>C NMR** (100 MHz, CDCl<sub>3</sub>): δ 167.5, 143.2, 135.9, 134.1, 131.8, 131.6, 131.2, 128.5, 128.1, 127.70, 127.67, 127.3, 126.8, 126.3, 123.8, 93.5, 81.5, 55.1, 40.1, 28.8, 27.9, 27.4, 24.6.

**HRMS** (ESI) *m/z* calcd. for C<sub>27</sub>H<sub>28</sub>NO [M+H]<sup>+</sup> 382.2165, found 382.2161.

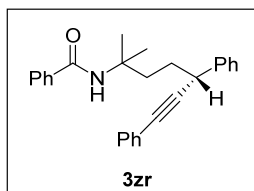

**(R)-N-(2-methyl-5,7-diphenylhept-6-yn-2-yl)benzamide (3zr)**

According to general procedure C: Colorless oil, 57.6 mg (72%, 91% ee).

**HPLC** analysis: Chiralcel AD-H (*n*-hexane/*i*-PrOH = 90/10, flow rate 0.8 mL/min, λ = 254 nm), *t<sub>R</sub>* (minor) = 9.59 min, *t<sub>R</sub>* (major) = 13.82 min.

**<sup>1</sup>H NMR** (400 MHz, CDCl<sub>3</sub>): δ 7.71-7.64 (m, 2H), 7.47-7.40 (m, 5H), 7.40-7.24 (m, 8H), 5.86 (s, 1H), 3.85 (t, *J* = 7.1 Hz, 1H), 2.07-1.99 (m, 2H), 1.91-1.84 (m, 2H), 1.44 (s, 3H), 1.43 (s, 3H); **<sup>13</sup>C NMR** (100 MHz, CDCl<sub>3</sub>): δ 166.9, 141.9, 135.8, 131.7, 131.1, 128.6, 128.5, 128.3, 127.9, 127.5, 126.9, 126.7, 123.6, 91.3, 83.7, 54.0, 38.5, 38.3, 33.6, 27.1, 27.0.

**HRMS** (ESI) *m/z* calcd. for C<sub>27</sub>H<sub>28</sub>NO [M+H]<sup>+</sup> 382.2165, found 382.2161.

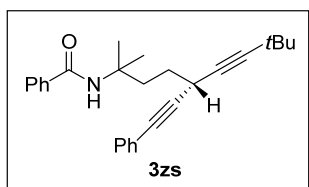

**(S)-N-(2,8,8-trimethyl-5-(phenylethynyl)non-6-yn-2-yl)benzamide (3zs)**

According to general procedure C: Colorless oil, 52.9 mg (69%, 78% ee).

**HPLC** analysis: Chiralcel AD3 (*n*-hexane/*i*-PrOH = 98/2, flow rate 0.8 mL/min, λ = 254 nm), *t<sub>R</sub>* (minor) = 13.31 min, *t<sub>R</sub>* (major) = 13.63 min.

**<sup>1</sup>H NMR** (400 MHz, CDCl<sub>3</sub>): δ 7.77-7.66 (m, 2H), 7.47-7.35 (m, 6H), 7.30-7.26 (m, 2H), 5.94 (s, 1H), 3.57 (t, *J* = 6.8 Hz, 1H), 2.13-2.02 (m, 2H), 1.86-1.77 (m, 2H), 1.48 (d, *J* = 1.7 Hz, 6H), 1.22 (s, 9H); **<sup>13</sup>C NMR** (100 MHz, CDCl<sub>3</sub>): δ 166.9, 135.8, 131.8, 131.1, 128.5, 128.2, 128.0, 126.8, 123.3, 90.2, 88.7, 80.9, 76.5, 53.9, 37.9, 31.4, 31.1, 27.4, 27.0, 24.1.



**HRMS** (ESI)  $m/z$  calcd. for  $C_{27}H_{32}NO$   $[M+H]^+$  386.2478, found 386.2476.

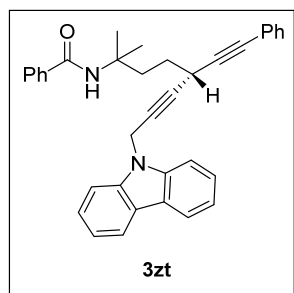

**(R)-N-(8-(9H-carbazol-9-yl)-2-methyl-5-(phenylethynyl)oct-6-yn-2-yl)benzamide (3zt)**

According to general procedure C: Yellow oil, 54.7 mg (56%, 87% ee).

**HPLC** analysis: Chiralcel AD-H (*n*-hexane/*i*-PrOH = 90/10, flow rate 0.8 mL/min,  $\lambda$  = 230 nm),  $t_R$  (major) = 26.30 min,  $t_R$  (minor) = 32.30 min.

**$^1H$  NMR** (400 MHz,  $CDCl_3$ ):  $\delta$  8.07 (d,  $J$  = 7.7 Hz, 2H), 7.68-7.62 (m, 2H), 7.54-7.49 (m, 2H), 7.48-7.42 (m, 3H), 7.41-7.36 (m, 4H), 7.31-7.25 (m, 3H), 7.23 (t,  $J$  = 7.4 Hz, 2H), 5.71 (s, 1H), 5.08 (d,  $J$  = 2.1 Hz, 2H), 3.54 (td,  $J$  = 6.6, 5.7, 3.3 Hz, 1H), 2.02-1.89 (m, 2H), 1.78-1.68 (m, 2H), 1.32 (d,  $J$  = 2.5 Hz, 6H);  **$^{13}C$  NMR** (100 MHz,  $CDCl_3$ ):  $\delta$  166.9, 140.0, 135.8, 131.8, 131.2, 128.5, 128.2, 128.1, 126.7, 125.8, 123.2, 122.8, 120.4, 119.4, 109.0, 87.0, 82.8, 81.1, 75.8, 53.7, 37.4, 32.8, 30.8, 26.9, 24.1.

**HRMS** (ESI)  $m/z$  calcd. for  $C_{36}H_{33}N_2O$   $[M+H]^+$  509.2587, found 509.2586.

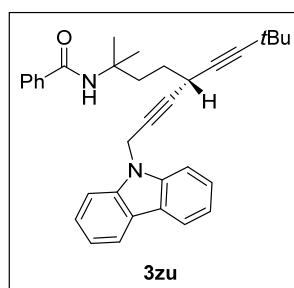

**(R)-N-(5-(3-(9H-carbazol-9-yl)prop-1-yn-1-yl)-2,8,8-trimethylnon-6-yn-2-yl)benzamide (3zu)**

According to general procedure D: Yellow oil, 58.4 mg (72%, 75% ee).

**HPLC** analysis: Chiralcel AD-H (*n*-hexane/*i*-PrOH = 90/10, flow rate 0.8 mL/min,  $\lambda$  = 230 nm),  $t_R$  (minor) = 11.20 min,  $t_R$  (major) = 17.91 min.

**$^1H$  NMR** (400 MHz,  $CDCl_3$ ):  $\delta$  8.06 (dt,  $J$  = 7.7, 0.9 Hz, 2H), 7.70-7.62 (m, 2H), 7.54-7.36 (m, 7H), 7.22 (dd  $J$  = 7.9, 7.0 Hz, 2H), 5.69 (s, 1H), 5.03 (d,  $J$  = 2.1 Hz, 2H), 3.27 (td,  $J$  = 5.7, 4.7, 3.4 Hz, 1H), 1.85-1.76 (m, 2H), 1.63-1.52 (m, 2H), 1.30 (s, 6H), 1.17 (s, 9H);  **$^{13}C$  NMR** (100 MHz,  $CDCl_3$ ):  $\delta$  166.8, 140.0, 135.9, 131.1, 128.5, 126.7, 125.8, 123.2, 120.3, 119.4, 109.0, 90.1, 83.4, 76.2, 75.0, 53.7, 37.6, 32.9, 31.1, 27.3, 26.79, 26.77, 23.4.

**HRMS** (ESI)  $m/z$  calcd. for  $C_{34}H_{37}N_2O$   $[M+H]^+$  489.2900, found 489.2898.

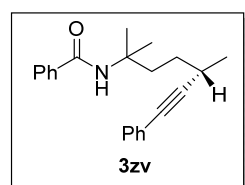

**(S)-N-(2,5-dimethyl-7-phenylhept-6-yn-2-yl)benzamide (3zv)**

According to general procedure C: Colorless oil, 32.1 mg (50%, 0% ee).

**HPLC** analysis: Chiralcel IA (*n*-hexane/*i*-PrOH = 98/2, flow rate 0.8 mL/min,  $\lambda$  = 254 nm),  $t_R$  (minor) = 28.03 min,  $t_R$  (major) = 30.70 min.

**$^1H$  NMR** (400 MHz,  $CDCl_3$ ):  $\delta$  7.75-7.64 (m, 2H), 7.48-7.36 (m, 5H), 7.31-7.24 (m, 3H), 5.91 (s, 1H), 2.66 (q,  $J$  = 6.9 Hz, 1H), 2.15-1.90 (m, 2H), 1.60-1.52 (m, 2H), 1.47 (d,  $J$  = 6.5 Hz, 6H), 1.27 (d,  $J$  = 6.9 Hz, 3H);  **$^{13}C$  NMR** (100 MHz,  $CDCl_3$ ):  $\delta$  166.9, 135.9, 131.6, 131.1, 128.5, 128.2, 127.6, 126.7, 123.9, 94.4, 81.1, 54.0, 38.3, 31.7, 27.1, 27.0, 26.8, 21.1.

**HRMS** (ESI)  $m/z$  calcd. for  $C_{22}H_{26}NO$   $[M+H]^+$  320.2009, found 320.2006.

## Removing the amide group to afford indirect enantioselective oxidative $C(sp^3)$ - $C(sp)$ coupling

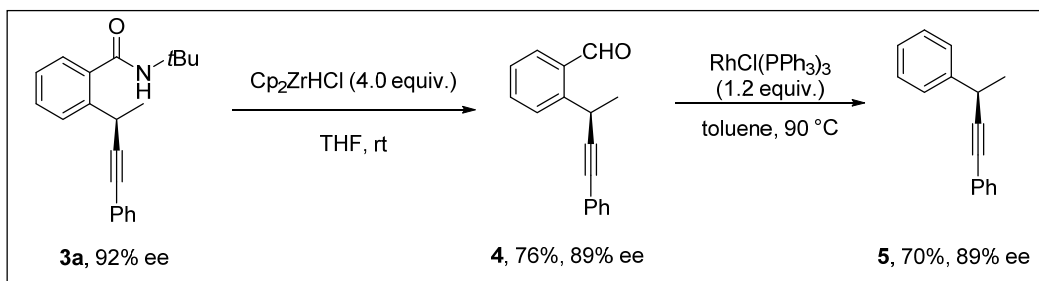

Supplementary Figure 244 Removing the amide group

In a glovebox, the Schwartz reagent (103.2 mg, 0.4 mmol) and a stir bar were added to a Schlenk tube, which was then sealed with a rubber septum and removed from the box. Next, amide **3a** (30.5 mg, 0.10 mmol) in anhydrous THF (2.0 mL) was added into the tube via syringe and the heterogeneous mixture was stirred vigorously at rt for 4 h. The resulting reaction mixture was then transferred to a separatory funnel and diluted with 20 mL water. The resulting mixture was extracted with DCM and the combined organic layers were dried over anhydrous  $MgSO_4$ . After removal of the solvent under reduced pressure, the crude product was purified by column chromatography on silica gel to give the corresponding aldehyde **4** (17.8 mg, 76%, 89% ee) as a colorless oil.

Under argon atmosphere, an oven-dried Schlenk tube equipped with a magnetic stir bar was charged with aldehyde **4** (11.7 mg, 0.050 mmol),  $RhCl(PPh_3)_3$  (55.5 mg, 0.060 mmol), and anhydrous toluene (1.0 mL). Then, the mixture was stirred at 90 °C for 12 h. The reaction mixture was filtered through celite and washed with EtOAc. After removal of solvent, the residue was purified by silica gel column chromatography to give alkyne **5** (7.1 mg, 70%, 89% ee) as a colorless oil.

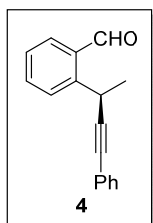

### $(S)$ -2-(4-phenylbut-3-yn-2-yl)benzaldehyde (**4**)

**HPLC** analysis: Chiralcel AD-H (*n*-hexane/*i*-PrOH = 90/10, flow rate 0.8 mL/min,  $\lambda = 254$  nm),  $t_R$  (minor) = 7.25 min,  $t_R$  (major) = 8.22 min.

**$^1H$  NMR** (400 MHz,  $CDCl_3$ ):  $\delta$  10.30 (s, 1H), 7.89 (dd,  $J = 7.8, 1.2$  Hz, 1H), 7.82 (dd,  $J = 7.6, 1.5$  Hz, 1H), 7.62 (td,  $J = 7.6, 1.5$  Hz, 1H), 7.50-7.40 (m, 3H), 7.34-7.26 (m, 3H), 5.09 (q,  $J = 7.0$  Hz, 1H), 1.59 (d,  $J = 7.0$  Hz, 3H);  **$^{13}C$  NMR** (100

MHz,  $CDCl_3$ ):  $\delta$  192.7, 145.6, 134.2, 133.6, 132.4, 131.6, 128.8, 128.3, 127.9, 127.3, 123.5, 92.3, 82.7, 28.2, 24.6.

**HRMS** (ESI)  $m/z$  calcd. for  $C_{17}H_{15}O$   $[M+H]^+$  235.1117, found 235.1114.

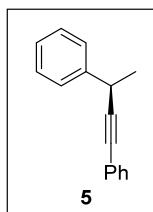

### $(-)$ - $(R)$ -but-1-yne-1,3-diylidibenzene (**5**)

**HPLC** analysis: Chiralcel OD-H (*n*-hexane/*i*-PrOH = 99.5/0.5, flow rate 1.0 mL/min,  $\lambda = 254$  nm),  $t_R$  (minor) = 13.60 min,  $t_R$  (major) = 19.33 min.

$[\alpha]_D^{27} = -12.8$  ( $c$  0.71,  $\text{CHCl}_3$ ).

$^1\text{H NMR}$  (400 MHz,  $\text{CDCl}_3$ ):  $\delta$  7.49-7.41 (m, 4H), 7.39-7.27 (m, 5H), 7.27-7.21 (m, 1H), 3.98 (q,  $J = 7.1$  Hz, 1H), 1.58 (d,  $J = 7.2$  Hz, 3H);  $^{13}\text{C NMR}$  (100 MHz,  $\text{CDCl}_3$ )  $\delta$  143.4, 131.7, 128.6, 128.2, 127.8, 127.0, 126.7, 123.7, 92.6, 82.5, 32.5, 24.6.

**HRMS** (ESI)  $m/z$  calcd. for  $\text{C}_{16}\text{H}_{15}$   $[\text{M}+\text{H}]^+$  207.1168, found 207.1161.

### Versatile transformations for construction of chiral $\text{C}(sp^3)\text{--C}(sp^2)$ and $\text{C}(sp^3)\text{--C}(sp^3)$ bonds

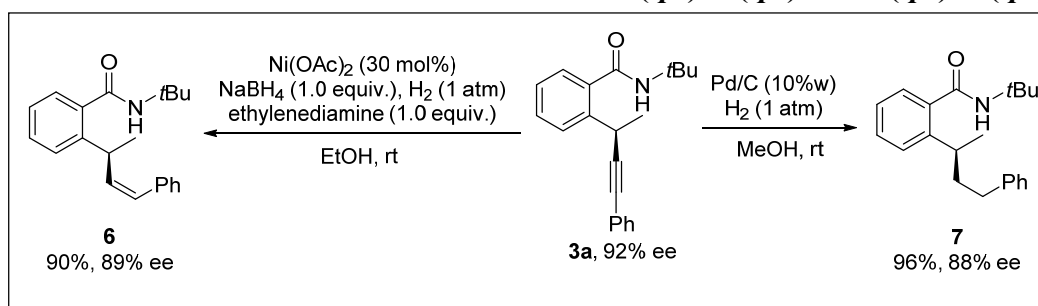

### Supplementary Figure 245 Construction of chiral $\text{C}(sp^3)\text{--C}(sp^2)$ and $\text{C}(sp^3)\text{--C}(sp^3)$ bonds

To a solution of  $\text{Ni}(\text{OAc})_2 \cdot \text{H}_2\text{O}$  (3.7 mg, 0.015 mmol) in EtOH (0.5 mL) under  $\text{H}_2$  atmosphere (1 atm) was added a solution of  $\text{NaBH}_4$  (1.9 mg, 0.05 mmol) in EtOH (0.5 mL) at rt. After stirring for 1 h, a solution of amide **3a** (15.3 mg, 0.05 mmol) and ethylenediamine (3.0 mg, 0.05 mmol) in EtOH (0.5 mL) was added and the reaction was stirred overnight. Solvent was evaporated and the residue was purified by column chromatography on silica gel to give product **6** (13.8 mg, 90%, 89% ee) as a colorless oil.

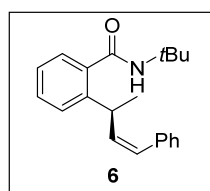

#### $(S,Z)\text{-}N\text{-}(tert\text{-butyl})\text{-}2\text{-}(4\text{-phenylbut-}3\text{-en-}2\text{-yl})\text{benzamide}$ (**6**)

**HPLC** analysis: Chiralcel AD3 ( $n\text{-hexane}/i\text{-PrOH} = 98/2$ , flow rate 0.8 mL/min,  $\lambda = 254$  nm),  $t_R$  (minor) = 16.19 min,  $t_R$  (major) = 18.13 min.

$^1\text{H NMR}$  (400 MHz,  $\text{CDCl}_3$ ):  $\delta$  7.44 (dd,  $J = 8.0, 1.2$  Hz, 1H), 7.35 (td,  $J = 7.6, 1.6$  Hz, 1H), 7.31-7.25 (m, 3H), 7.24-7.15 (m, 4H), 6.42 (d,  $J = 11.6$  Hz, 1H), 5.95 (dd,  $J = 11.6, 9.8$  Hz, 1H), 5.40 (s, 1H), 4.49-4.36 (m, 1H), 1.45 (d,  $J = 6.8$  Hz, 3H), 1.27 (s, 9H);  $^{13}\text{C NMR}$  (100 MHz,  $\text{CDCl}_3$ ):  $\delta$  169.6, 144.3, 137.5, 137.2, 136.7, 129.8, 128.7, 128.4, 128.3, 127.10, 127.06, 126.8, 125.9, 51.6, 35.0, 28.6, 24.4.

**HRMS** (ESI)  $m/z$  calcd. for  $\text{C}_{21}\text{H}_{26}\text{NO}$   $[\text{M}+\text{H}]^+$  308.2009, found 308.2006.

A 10 mL Schlenk tube was charged with amide **3a** (15.3 mg, 0.050 mmol) and palladium on carbon (10%w, 2.0 mg). The tube was evacuated and refilled with hydrogen through a hydrogen balloon. After addition of 0.5 mL of methanol, the mixture was stirred at rt for 24 h under hydrogen. The reaction mixture was filtered through celite and washed with EtOAc. After removal of solvent, the residue was purified by silica gel chromatography to give 14.8 mg (96%, 88% ee) of amide **7** as a colorless oil.

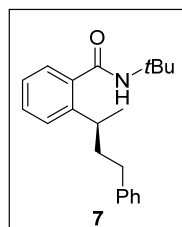

**(S)-N-(tert-butyl)-2-(4-phenylbutan-2-yl)benzamide (7)**

**HPLC** analysis: Chiralcel AD-H (*n*-hexane/*i*-PrOH = 90/10, flow rate 0.8 mL/min,  $\lambda = 214$  nm),  $t_R$  (minor) = 7.50 min,  $t_R$  (major) = 13.52 min.

**$^1\text{H}$  NMR** (400 MHz,  $\text{CDCl}_3$ ):  $\delta$  7.40-7.31 (m, 2H), 7.29-7.21 (m, 3H), 7.20-7.09 (m, 4H), 5.50 (s, 1H), 3.28-3.17 (m, 1H), 2.66-2.53 (m, 1H), 2.51-2.40 (m, 1H), 2.04-1.83 (m, 2H), 1.43 (s, 9H), 1.30 (d,  $J = 6.9$  Hz, 3H);  **$^{13}\text{C}$  NMR** (100 MHz,

$\text{CDCl}_3$ ):  $\delta$  170.0, 144.8, 142.5, 138.1, 129.7, 128.29, 128.27, 126.4, 126.3, 125.68, 125.66, 51.8, 39.8, 35.2, 34.2, 28.9, 22.8.

**HRMS** (ESI)  $m/z$  calcd. for  $\text{C}_{21}\text{H}_{28}\text{NO}$   $[\text{M}+\text{H}]^+$  310.2165, found 310.2160.

**Synthesis of chiral terminal alkyne building blocks**

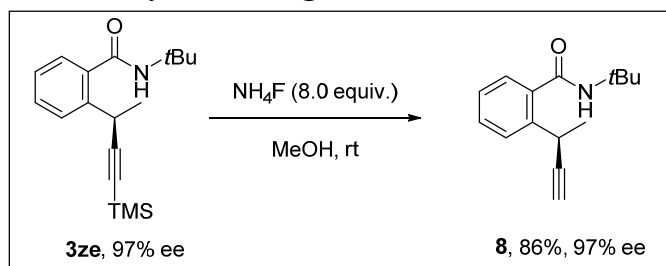

**Supplementary Figure 246** Synthesis of chiral terminal alkyne building blocks

To a solution of **3ze** (30.1 mg, 0.10 mmol) in MeOH (2.0 mL) was added  $\text{NH}_4\text{F}$  (29.6 mg, 0.8 mmol), and the reaction was stirred at rt for 24 h. After removal of solvent, the residue was purified by silica gel chromatography to give amide **8** (19.7 mg, 86%, 97% ee) as a colorless solid.

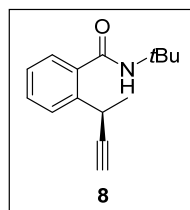

**(S)-2-(but-3-yn-2-yl)-N-(tert-butyl)benzamide (8)**

**HPLC** analysis: Chiralcel OD-3 (*n*-hexane/*i*-PrOH = 98/2, flow rate 0.8 mL/min,  $\lambda = 214$  nm),  $t_R$  (minor) = 8.86 min,  $t_R$  (major) = 10.06 min.

**$^1\text{H}$  NMR** (400 MHz,  $\text{CDCl}_3$ ):  $\delta$  7.65 (d,  $J = 7.8$  Hz, 1H), 7.40 (t,  $J = 7.6$  Hz, 1H), 7.31 (d,  $J = 7.4$  Hz, 1H), 7.26-7.21 (m, 1H), 5.72 (s, 1H), 4.29 (dd,  $J = 7.1$ , 2.7 Hz, 1H), 2.22 (d,  $J = 2.6$  Hz, 1H), 1.54 (d,  $J = 7.0$  Hz, 3H), 1.47 (s, 9H);  **$^{13}\text{C}$**

**NMR** (100 MHz,  $\text{CDCl}_3$ ):  $\delta$  169.2, 140.5, 136.5, 130.1, 127.7, 126.8, 87.7, 69.8, 52.0, 28.8, 28.1, 23.8.

**HRMS** (ESI)  $m/z$  calcd. for  $\text{C}_{15}\text{H}_{20}\text{NO}$   $[\text{M}+\text{H}]^+$  230.1539, found 230.1536.

**Radical inhibition experiments**

**Supplementary Table 2** Radical inhibition experiments

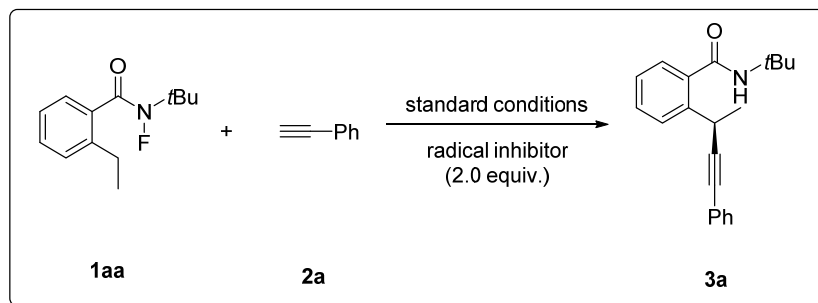

| entry | additive | yield |
|-------|----------|-------|
| 1     | no       | 88%   |
| 2     | BHT      | trace |
| 3     | TEMPO    | trace |

Under argon atmosphere, an oven-dried resealable Schlenk tube equipped with a magnetic stir bar was charged with CuI (1.9 mg, 0.010 mmol, 10 mol%), **L5** (6.1 mg, 0.010 mmol, 10 mol%), Cs<sub>2</sub>CO<sub>3</sub> (32.3 mg, 0.10 mmol, 1.0 equiv.), additive (0.20 mmol), and anhydrous THF (1.2 mL). Then, *N*-fluorocarboxamide **1aa** (0.10 mmol, 1.0 equiv.) and alkyne (0.20 mmol, 2.0 equiv.) were sequentially added into the mixture and the reaction mixture was stirred at rt for 16 h. Then, the precipitate was filtered off and washed by DCM. The filtrate was evaporated and the yield of product **3a** was determined by <sup>1</sup>H NMR analysis using CH<sub>2</sub>Br<sub>2</sub> as an internal standard.

### Synthesis of the clock substrate (±)-**9**:

(±)-**9** was synthesized according to the literature procedures.<sup>5</sup>

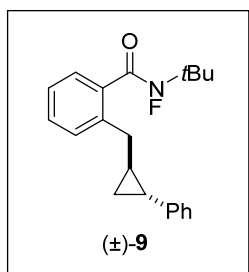

### *N*-(tert-butyl)-*N*-fluoro-2-((*trans*-2-phenylcyclopropyl)methyl)benzamide ((±)-**9**)

Yellow oil, 400 mg (27% yield). <sup>1</sup>H NMR (400 MHz, CDCl<sub>3</sub>): δ 7.42-7.30 (m, 3H), 7.26-7.19 (m, 3H), 7.14-7.09 (m, 1H), 7.07-7.01 (m, 2H), 2.94-2.76 (m, 2H), 1.81 (dt, *J* = 8.6, 4.9 Hz, 1H), 1.54 (d, *J* = 1.9 Hz, 9H), 1.45-1.34 (m, 1H), 1.01-0.91 (m, 2H); <sup>13</sup>C NMR (100 MHz, CDCl<sub>3</sub>): δ 174.9 (d, *J* = 10.7 Hz), 143.2, 138.8 (d, *J* = 2.0 Hz), 134.8, 130.1, 129.2, 128.3, 127.2 (d, *J* = 4.5 Hz), 125.8, 125.7, 125.4, 64.4 (d, *J* = 10.5 Hz), 36.8, 27.2 (d, *J* = 5.7 Hz), 23.6, 23.5, 16.2; <sup>19</sup>F NMR (376 MHz, CDCl<sub>3</sub>): δ -63.28.

HRMS (ESI) *m/z* calcd. for C<sub>21</sub>H<sub>25</sub>FNO [M+H]<sup>+</sup> 325.1915, found 325.1912.

### Radical clock experiment

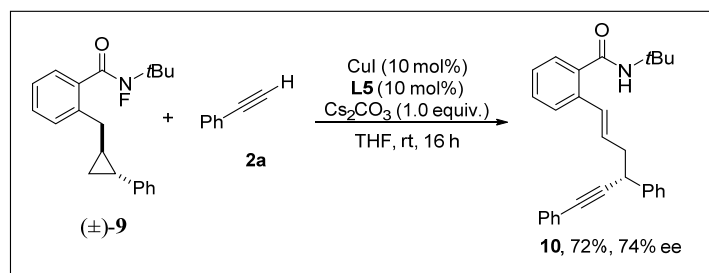

### Supplementary Figure 247 Radical clock experiment

Under argon atmosphere, an oven-dried resealable Schlenk tube equipped with a magnetic stir bar was charged with CuI (3.8 mg, 0.020 mmol, 10 mol%), **L5** (12.2 mg, 0.020 mmol, 10 mol%), Cs<sub>2</sub>CO<sub>3</sub> (65.2 mg, 0.20 mmol, 1.0 equiv.), and anhydrous THF (2.4 mL). Then, *N*-fluorocarboxamide (±)-**9** (65 mg, 0.20 mmol, 1.0 equiv.) and phenylacetylene **2a** (40.8 mg, 0.40 mmol, 2.0 equiv.) were sequentially added into the mixture and the reaction mixture was stirred at rt for 16 h. Upon completion (monitored by TLC), the precipitate was filtered off and washed by DCM. The filtrate was evaporated and the residue was purified by column chromatography on silica gel to afford the desired product **10** (58.9 mg, 72%, 74% ee).

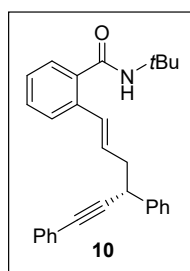

### (*R,E*)-*N*-(*tert*-butyl)-2-(4,6-diphenylhex-1-en-5-yn-1-yl)benzamide (**10**)

**HPLC** analysis: Chiralcel OZ3 (*n*-hexane/*i*-PrOH = 80/20, flow rate 0.8 mL/min,  $\lambda = 254$  nm),  $t_R$  (minor) = 7.53 min,  $t_R$  (major) = 11.43 min.

Colorless oil, <sup>1</sup>H NMR (400 MHz, CDCl<sub>3</sub>):  $\delta$  7.51-7.41 (m, 5H), 7.40-7.31 (m, 4H), 7.31-7.18 (m, 5H), 6.80-6.74 (m, 1H), 6.28 (dt,  $J = 15.7, 7.1$  Hz, 1H), 5.55 (s, 1H), 4.00 (t,  $J = 7.1$  Hz, 1H), 2.77 (td,  $J = 7.2, 1.5$  Hz, 2H), 1.41 (s, 9H); <sup>13</sup>C NMR (100 MHz, CDCl<sub>3</sub>):  $\delta$  169.0, 141.3, 136.4, 135.1, 131.7, 130.1, 129.73,

129.70, 128.6, 128.3, 127.9, 127.6, 127.3, 127.2, 127.0, 126.5, 123.6, 90.8, 84.1, 51.9, 42.2, 38.9, 28.9.

**HRMS** (ESI)  $m/z$  calcd. for C<sub>29</sub>H<sub>30</sub>NO [M+H]<sup>+</sup> 408.2322, found 408.2314.

### Intramolecular kinetic isotope effect (KIE) study

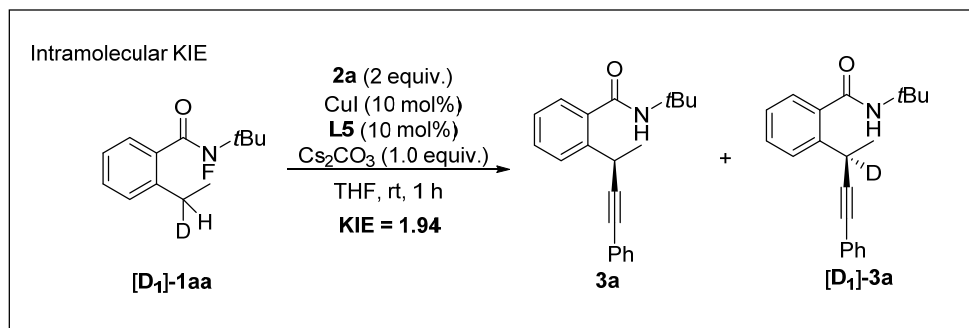

### Supplementary Figure 248 Intramolecular kinetic isotope effect (KIE) study

According to the General Procedure A, the intramolecular KIE experiment was performed using

**[D<sub>1</sub>]-1aa** (0.1 mmol, run in triplicate) for 1 h. The crude reaction mixture was analyzed by <sup>1</sup>H NMR, and the intramolecular KIE was calculated by the observed ratio of **[D<sub>1</sub>]-3a/3a**, with a range from 1.78 to 2.14.

### Intermolecular KIE study

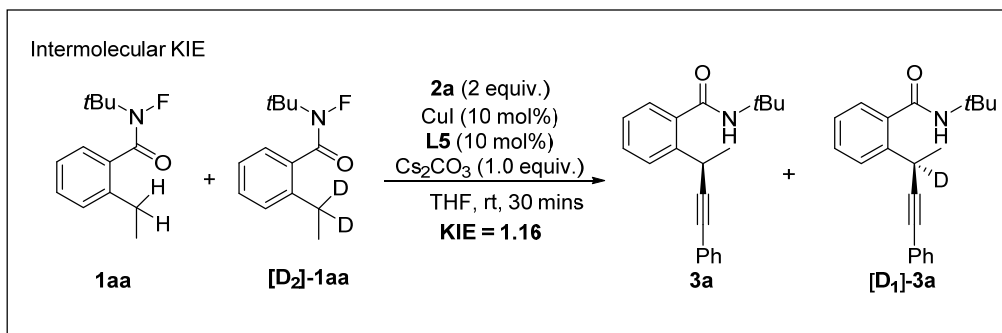

**Supplementary Figure 249** Intermolecular KIE study

According to the General Procedure A, the intermolecular KIE experiment was performed using a 1:1 mixture of **1aa** and **[D<sub>2</sub>]-1aa** (0.05 mmol each, run in triplicate) for 30 mins. The crude reaction mixture was analyzed by <sup>1</sup>H NMR, and the intramolecular KIE was calculated by the observed ratio of **3a/[D<sub>1</sub>]-3a**, with a range from 1.11 to 1.27.

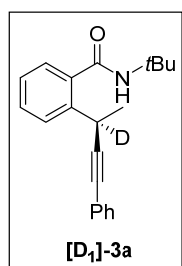

### **(S)-N-(tert-butyl)-2-(4-phenylbut-3-yn-2-yl-2-d)benzamide ([D<sub>1</sub>]-3a)**

According to general procedure A: 55.0 mg (85% yield).

Colorless oil, <sup>1</sup>H NMR (400 MHz, CDCl<sub>3</sub>): δ 7.72 (dd, *J* = 8.0, 1.2 Hz, 1H), 7.46-7.36 (m, 3H), 7.33 (dd, *J* = 7.6, 1.6 Hz, 1H), 7.30-7.23 (m, 4H), 5.76 (s, 1H), 1.60 (s, 3H), 1.47 (s, 9H); <sup>13</sup>C NMR (100 MHz, CDCl<sub>3</sub>): δ 169.3, 141.1, 136.6, 131.6, 130.1, 128.2, 127.9, 127.8, 126.8, 126.7, 123.7, 93.2, 82.1, 52.0, 28.8, 28.4(t, *J* = 19.5 Hz), 24.0.

**HRMS** (ESI) *m/z* calcd. for C<sub>21</sub>H<sub>23</sub>DNO [M+H]<sup>+</sup> 307.1915, found 307.1911.

### Control experiment with copper phenylacetylide

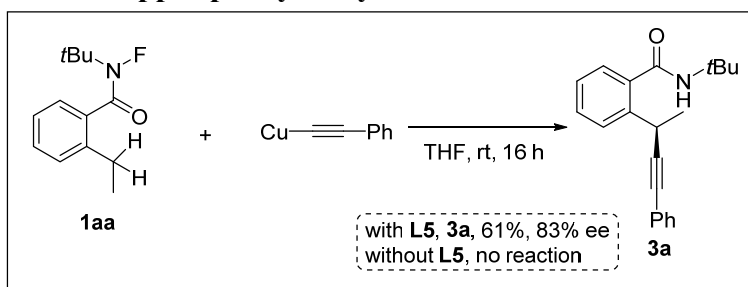

**Supplementary Figure 250** Control experiment with copper phenylacetylide

Copper phenylacetylide was synthesized according to literature procedures.<sup>11</sup>

Under argon atmosphere, an oven-dried resealable Schlenk tube equipped with a magnetic stir bar was charged with copper phenylacetylide (16.5 mg, 0.10 mmol, 1.0 equiv.), *N*-fluorocarboxamide **1aa** (22.3 mg, 0.10 mmol, 1.0 equiv.), **L5** (61.1 mg, 0.10 mmol, 1.0 equiv.), and anhydrous THF (1.2 mL). The resulting reaction mixture was stirred at rt for 16 h. Then, the reaction mixture was filtered and washed by DCM. The filtrate was concentrated and the residue was purified by column chromatography on silica gel (petroleum ether) to afford **3a** (18.3 mg, 61% yield, 83% ee).

The procedure for the reaction without **L5** was the same with that described above except that **L5** was not added. No desired product **3a** was observed.



## Supplementary References:

- 1 Guisán-Ceinos, M., Martín-Heras, V. & Tortosa, M. Regio- and stereospecific copper-catalyzed substitution reaction of propargylic ammonium salts with aryl Grignard reagents. *J. Am. Chem. Soc.* **139**, 8448–8451 (2017).
- 2 García Ruano, J. L., Marzo, L., Marcos, V., Alvarado, C. & Alemán, J. Highly stereoselective synthesis of tertiary propargylic centers and their isomerization to enantiomerically enriched allenes. *Chem. Eur. J.* **18**, 9775–9779 (2012).
- 3 Caeiro, J., Sestelo, J. P. & Sarandeses, L. A. Enantioselective nickel-catalyzed cross-coupling reactions of trialkynylindium reagents with racemic secondary benzyl bromides. *Chem. Eur. J.* **14**, 741–746 (2008).
- 4 Osako, T., Nagaosa, M., Hamasaka, G. & Uozumi, Y. Asymmetric copper-catalyzed C(sp)<sup>3</sup>–H bond insertion of carbenoids derived from N-tosylhydrazones. *synlett* **29**, 2551–2556 (2018).
- 5 Groendyke, B. J., AbuSalim, D. I. & Cook, S. P. Iron-catalyzed, fluoroamide-directed C–H fluorination. *J. Am. Chem. Soc.* **138**, 12771–12774 (2016).
- 6 Miles, K. C., Le, C. C. & Stambuli, J. P. Direct carbocyclizations of benzoic acids: catalyst-controlled synthesis of cyclic ketones and the development of tandem aHH (acyl Heck–Heck) reactions. *Chem. Eur. J.* **20**, 11336–11339 (2014).
- 7 Ling, P.-X. et al. Palladium-catalyzed arylation of unactivated  $\gamma$ -methylene C(sp<sup>3</sup>)–H and  $\delta$ -C–H bonds with an oxazoline-carboxylate auxiliary. *Chem. Eur. J.* **21**, 17503–17507 (2015).
- 8 Wang, D. et al. Asymmetric copper-catalyzed intermolecular aminoarylation of styrenes: efficient access to optical 2,2-diarylethylamines. *J. Am. Chem. Soc.* **139**, 6811–6814 (2017).
- 9 Chen, H. Guo, L. & Yu, S. Primary, secondary, and tertiary  $\gamma$ -C(sp<sup>3</sup>)–H vinylation of amides via organic photoredox-catalyzed hydrogen atom transfer. *Org. Lett.* **20**, 6255–6259 (2018).
- 10 Kamata, K., Yamaguchi, S., Kotani, M., Yamaguchi, K. & Mizuno, N. Efficient oxidative alkyne homocoupling catalyzed by a monomeric dicopper-substituted silicotungstate. *Angew. Chem., Int. Ed.* **47**, 2407–2410 (2008).
- 11 Sagadevan, A., Ragupathi, A. & Hwang, K. C. Photoinduced copper-catalyzed regioselective synthesis of indoles: three-component coupling of arylamines, terminal alkynes, and quinones. *Angew. Chem., Int. Ed.* **54**, 13896–13901 (2015).
